# Supplementary material for: N-Glycoproteomic Profiling Reveals Alteration In Extracellular Matrix Organization In Non-Type Bladder Carcinoma
Source: MDPI journal article supplement (doi:10.3390/jcm8091303), 2019-08-24
Supplement: s1 [file s1]

**N-Glycosylation profile reveals alteration in extracellular matrix organization pathway  
in non-type bladder carcinoma**

Barnali Deb, Krishna Patel, Gajanan Sathe\* and Prashant Kumar\*

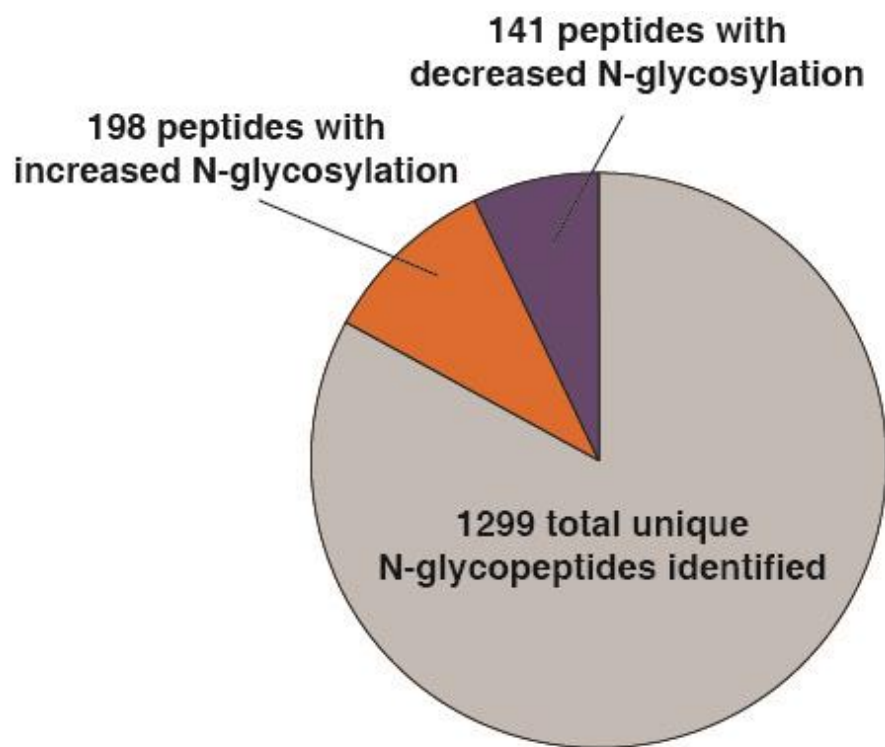

Supplementary figure S1: Identification of dysregulated N-glycosylation in bladder carcinoma cell lines.

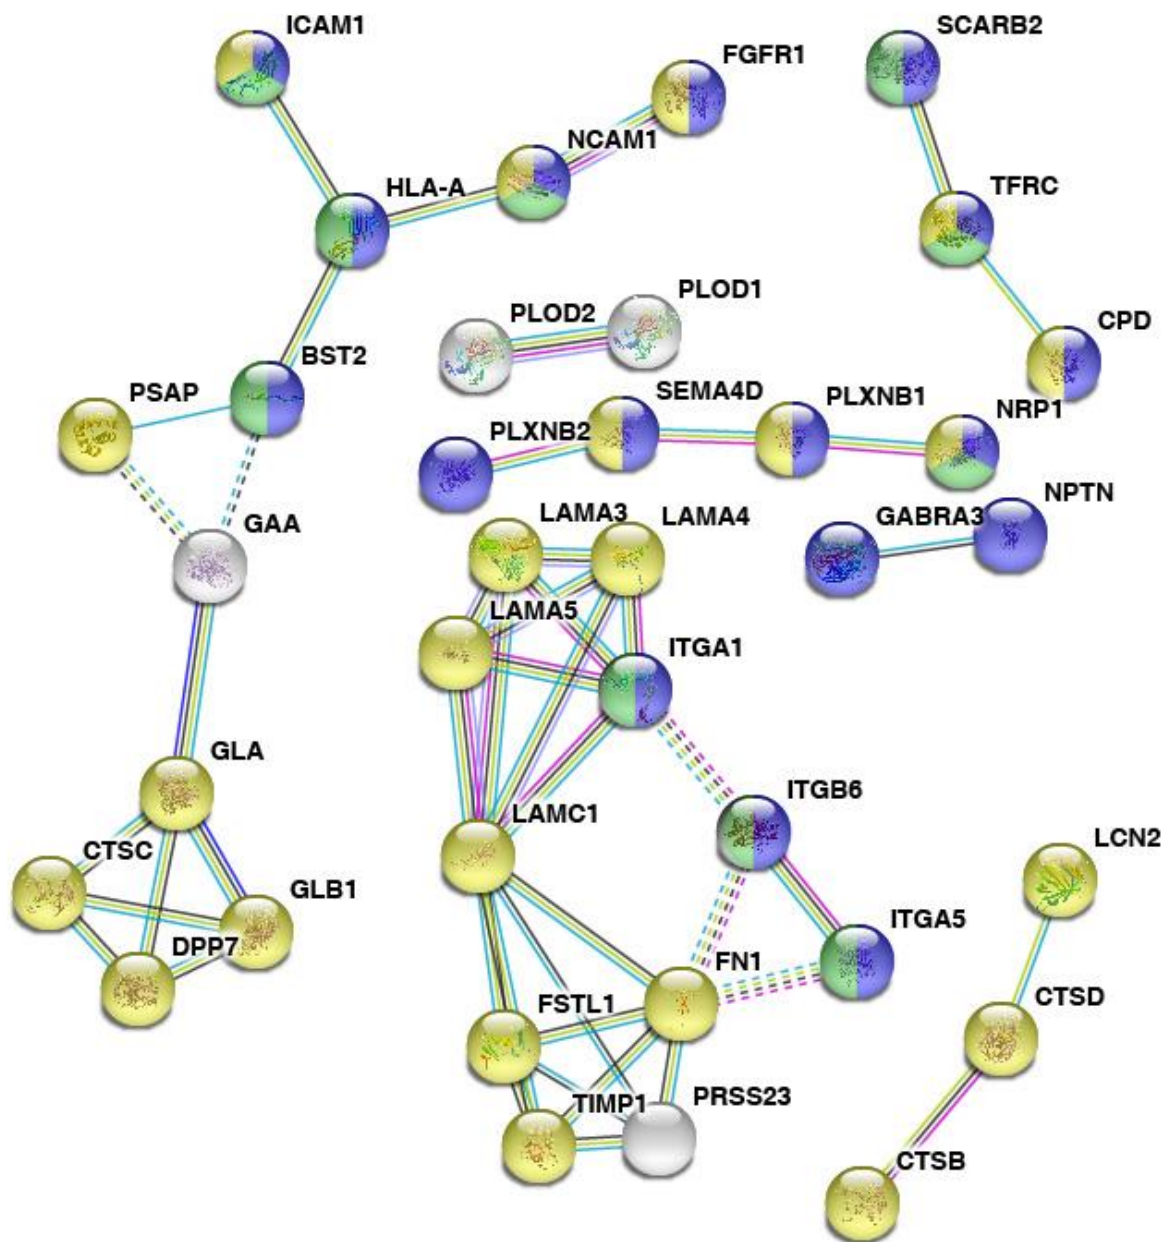

Supplementary figure S2: Interaction of 32 proteins identified to be a part of integral part of the membrane or/and cell surface protein or/and a part of the extracellular region.
