# Supplementary material for: N-Glycoproteomic Profiling Reveals Alteration In Extracellular Matrix Organization In Non-Type Bladder Carcinoma
Source: J Clin Med. 2019 Aug 24;8(9):1303. doi: 10.3390/jcm8091303 (PMC6780497; doi:10.3390/jcm8091303)
Supplement: Supplementary file 1 [file jcm-08-01303-s001.zip › jcm-557887-supplementary/Supplementary tables_JCM_Deb et al_2019.xlsx]

## Sheet: S1
Supplementary table S1 : Quantification of N-glycopeptides and their total protein expression fold change in bladder carcinoma cell lines
Deb et al., 2019. N-Glycosylation profile reveals alteration in extracellular matrix organization pathway in Non-type bladder carcinoma
Gene symbol	Gene ID	Protein GI Accession	Protein RefSeq accession	Position of Glycosylation in protein	Glycosylation motif	ptmRS: Best site probabilities>=70	Position of Glycosylation in peptid	Motif string	Upstream	Downstream	Reported in Uniprot	Confidence	Annotated Sequence	Modifications	Qvality PEP	Qvality q-value	# Protein Groups	# Proteins	# PSMs	Master Protein Accessions	Positions in Master Proteins	# Missed Cleavages	Theo. MH+ [Da]	ptmRS: Best Site Probabilities	Grouped abundance_SW780	Grouped abundance_RT112	Grouped abundance_VMCUB1	Grouped abundance_J82	Grouped abundance_T24	Grouped abundance_UMUC3	Avg luminal/basal	Avg non-type	Fold change_N-glycosylation	Fold change_Global proteome	Quan Info	XCorr Sequest HT	Confidence Sequest HT	Percolator q-Value Sequest HT	Percolator PEP Sequest HT
A2M	2	578822814	XP_006719119.1	869	Yes	Yes	7	NFT	PKSLGNV	FTVSAEA	No	High	[K].SLGNVNFTVSAEALESQELCGTEVPSVPEHGR.[K]	1xCarbamidomethyl [C20]; 1xTMT6plex [N-Term]; 1xDeamidated [N6(100)]	7.20945e-06	0	1	2	7	578822814	578822814 [864-895]	0	3643.77	N6(Deamidated): 100	133.4	118.5	120.3	324.6	141.2	131	124.067	198.933	1.60344	1.48	Unique	5.90917	High	0	4.704e-07
A2M	2	578822814	XP_006719119.1	869	Yes	Yes	7	NFT	PKSLGNV	FTVSAEA	No	High	[K].SLGNVNFTVSAEALESQELCGTEVPSVPEHGRK.[D]	1xCarbamidomethyl [C20]; 2xTMT6plex [N-Term; K33]; 1xDeamidated [N6(99.5)]	4.13407e-08	0	1	2	2	578822814	578822814 [864-896]	1	4001.03	N6(Deamidated): 99.51	41.9	34.5	30.1	46.5	37.6	42.7	35.5	42.2667	1.19061	1.48	Unique	3.94156	High	0	1.755e-11
A4GALT	53947	578837271	XP_006724329.1	121	Yes	Yes	7	NAS	MKGLPGG	ASLPRHL	No	High	[K].GLPGGNASLPR.[H]	1xTMT6plex [N-Term]; 1xDeamidated [N6(100)]	0.0252344	0	1	1	4	578837271	578837271 [116-126]	0	1268.72	N6(Deamidated): 100	12.7	11.2	8.8	10.3	28.7	8	10.9	15.6667	1.43731	#N/A	Unique	2.31613	High	0	0.00262
ABCA1	19	767956548	XP_011516641.1	503	Yes	Yes	10	NGS	PEDVQSS	GSVYTWR	No	High	[K].HPEDVQSSNGSVYTWR.[E]	1xTMT6plex [N-Term]; 1xDeamidated [N9(100)]	0.0732403	0.00117085	1	8	1	767956548	767956548 [495-510]	0	2091.99	N9(Deamidated): 100	11.2	10.1	11.4	7	10.9	15.3	10.9	11.0667	1.01529	#N/A	Unique	1.30744	High	0.0003202	0.0122
ABCA1	19	767956548	XP_011516641.1	514	Yes	Yes	5	NET	YTWREAF	ETNQAIR	No	High	[R].EAFNETNQAIR.[T]	1xTMT6plex [N-Term]; 1xDeamidated [N4(100)]	0.000141756	0	1	8	5	767956548	767956548 [511-521]	0	1522.77	N4(Deamidated): 100	50.5	11.2	24	85.8	34.5	20.2	28.5667	46.8333	1.63944	#N/A	Unique	3.2004	High	0	1.723e-06
ABCA1	19	767956548	XP_011516641.1	269	Yes	Yes	4	NST	KPILRTL	STSPFPS	No	High	[R].TLNSTSPFPSK.[E]	1xTMT6plex [K11]; 1xDeamidated [N3(100)]	0.0293524	0	1	8	3	767956548	767956548 [267-277]	0	1408.75	N3(Deamidated): 100	12.9	10.8	9.4	12.7	15.5	10.1	11.0333	12.7667	1.1571	#N/A	Unique	1.7631	High	0	0.003249
ACP2	53	4557010	NP_001601.1	439	Yes	Yes	5	NIS	PVLSRTQ	FTLLVQG	No	High	[R].FNPNISWQPIPVHTVPITEDR.[QL]	1xTMT6plex [N-Term]; 1xDeamidated [N4(99.7)]	9.94021e-05	0	1	4	1	4557010	4557010 [130-150]	0	2690.41	N4(Deamidated): 99.66	10.4	5.8	9.3	11.4	9.1	11.7	8.5	10.7333	1.26275	#DIV/0!	Unique	3.04945	High	0	1.045e-06
ACP2	53	4557010	NP_001601.1	267	Yes	Yes	3	NLT	LLAQIRK	LTLMATT	Yes	High	[R].KNLTLMATTSQLPK.[L]	3xTMT6plex [K1; N-Term; K14]; 1xOxidation [M6(100)]; 1xDeamidated [N2(100)]	5.2522e-05	0	1	5	3	4557010	4557010 [266-279]	1	2250.33	N2(Deamidated): 100; M6(Oxidation): 100	17.7	12.6	15	11.7	17.7	15.1	15.1	14.8333	0.98234	#DIV/0!	Unique	3.56807	High	0	4.225e-07
ACP2	53	4557010	NP_001601.1	267	Yes	Yes	3	NLT	LLAQIRK	LTLMATT	Yes	High	[R].KNLTLMATTSQLPK.[L]	2xTMT6plex [K1; K14]; 1xOxidation [M6(100)]; 1xDeamidated [N2(100)]	0.000667317	0	1	5	3	4557010	4557010 [266-279]	1	2021.17	N2(Deamidated): 100; M6(Oxidation): 100	10.2	6.2	8.9	9.4	12.7	8.1	8.43333	10.0667	1.19368	#DIV/0!	Unique	2.11289	High	0	1.53e-05
ACP2	53	4557010	NP_001601.1	177	Yes	Yes	8	NES	RQTPEYQ	ESSRNAQ	Yes	High	[R].QTPEYQNESSR.[N]	1xTMT6plex [N-Term]; 1xDeamidated [N7(100)]	0.000201189	0	1	3	9	4557010	4557010 [171-181]	0	1568.74	N7(Deamidated): 100	35.4	12.5	30.2	38.7	30.6	21.4	26.0333	30.2333	1.16133	#DIV/0!	Unique	2.80551	High	0	2.811e-06
ACP2	53	4557010	NP_001601.1	167	Yes	Yes	7	NET	PRYEQLQ	ETRQTPE	Yes	High	[R].YEQLQNETR.[Q]	1xTMT6plex [N-Term]; 1xDeamidated [N6(100)]	5.03029e-05	0	1	3	4	4557010	4557010 [162-170]	0	1410.71	N6(Deamidated): 100	38	16.9	29.9	48.9	34.6	32.3	28.2667	38.6	1.36557	#DIV/0!	Unique	3.09209	High	0	3.989e-07
ACP2	53	4557010	NP_001601.1	92	Yes	Yes	7	NTS	QRYHGFL	TSYHRQE	Yes	High	[R].YHGFLNTSYHR.[Q]	1xTMT6plex [N-Term]; 1xDeamidated [N6(100)]	0.000143811	0	1	4	3	4557010	4557010 [87-97]	0	1624.81	N6(Deamidated): 100	7.2	4.7	5.1	5	4.2	7.8	5.66667	5.66667	1	#DIV/0!	Unique	2.51728	High	0	1.752e-06
ADAM10	102	4557251	NP_001101.1	278	Yes	Yes	3	NTT	MVKRIRI	TTADEKD	Yes	High	[R].INTTADEKDPTNPFR.[F]	2xTMT6plex [N-Term; K8]; 1xDeamidated [N2(100)]	3.71838e-05	0	1	2	4	4557251	4557251 [277-291]	1	2178.14	N2(Deamidated): 100	10.9	17.8	20	6.1	17.5	17.8	16.2333	13.8	0.850103	0.92	Unique	2.26455	High	0	8.276e-07
ADAM10	102	4557251	NP_001101.1	278	Yes	Yes	3	NTT	MVKRIRI	TTADEKD	Yes	High	[R].INTTADEKDPTNPFR.[F]	1xTMT6plex [K8]; 1xDeamidated [N2(100)]	0.00028011	0	1	2	1	4557251	4557251 [277-291]	1	1948.98	N2(Deamidated): 100	11.7	14.1	16.7	10.7	15.7	14.2	14.1667	13.5333	0.955294	0.92	Unique	2.46294	High	0	4.503e-06
ADAM10	102	4557251	NP_001101.1	278	Yes	Yes	3	NTT	MVKRIRI	TTADEKD	Yes	High	[R].INTTADEKDPTNPFRFPNIGVEK.[F]	2xTMT6plex [K8; K23]; 1xDeamidated [N2(99.7)]	0.000467952	0	1	2	2	4557251	4557251 [277-299]	2	3062.62	N2(Deamidated): 99.69	10.6	21.4	23.5	10	19.8	14.3	18.5	14.7	0.794595	0.92	Unique	2.54768	High	0	9.276e-06
ADAM10	102	4557251	NP_001101.1	278	Yes	Yes	3	NTT	MVKRIRI	TTADEKD	Yes	High	[R].INTTADEKDPTNPFRFPNIGVEK.[F]	2xTMT6plex [K8; K23]; 2xDeamidated [N2(100); N]	0.0752912	0.00173548	1	2	1	4557251	4557251 [277-299]	2	3063.6	N2(Deamidated): 100; N12(Deamidated): 50; N18(Deamidated): 50	4.2	14.4	16.7	4.9	8.3	5.6	11.7667	6.26667	0.532578	0.92	Unique	1.42785	High	0.0004721	0.01269
ADAM10	102	4557251	NP_001101.1	278	Yes	Yes	3	NTT	MVKRIRI	TTADEKD	Yes	High	[R].INTTADEKDPTNPFRFPNIGVEK.[F]	3xTMT6plex [N-Term; K8; K23]; 1xDeamidated [N2(100)]	8.36381e-05	0	1	2	2	4557251	4557251 [277-299]	2	3291.78	N2(Deamidated): 100	14.7	27.5	32.1	12.4	19.5	16.6	24.7667	16.1667	0.652759	0.92	Unique	2.4047	High	0	8.142e-07
ADAM10	102	4557251	NP_001101.1	278	Yes	Yes	3	NTT	MVKRIRI	TTADEKD	Yes	High	[R].INTTADEKDPTNPFRFPNIGVEK.[F]	3xTMT6plex [N-Term; K8; K23]; 2xDeamidated [N2(100); N12(100)]	1.11551e-05	0	1	2	1	4557251	4557251 [277-299]	2	3292.77	N2(Deamidated): 100; N12(Deamidated): 100	19.1	56.5	51.4	16	33.8	28.4	42.3333	26.0667	0.615748	0.92	Unique	2.46124	High	0	4.753e-08
ADAM17	6868	73747889	NP_003174.3	452	Yes	Yes	5	NCS	ENNKMFS	CSKQSIY	No	High	[K].MFSNCSK.[Q]	1xCarbamidomethyl [C5]; 1xTMT6plex [K7]; 1xOxidation [M1(100)]; 1xDeamidated [N4(100)]	0.209726	0.00926046	1	4	1	73747889	73747889 [449-455]	0	1119.5	M1(Oxidation): 100; N4(Deamidated): 100	9.1	11.1	7.9	4.8	9	9.4	9.36667	7.73333	0.825623	#N/A	Unique	1.63031	High	0.002989	0.05827
ADAM17	6868	73747889	NP_003174.3	174	Yes	Yes	7	NVS	YKSEDIK	VSRLQSP	No	High	[K].SEDIKNVSR.[L]	1xTMT6plex [K5]; 1xDeamidated [N6(100)]	0.0462766	0.000598249	1	2	2	73747889	73747889 [169-177]	1	1277.69	N6(Deamidated): 100	4.4	7.2	2.9	5.1	5.4	5.2	4.83333	5.23333	1.08276	#N/A	Unique	1.48459	High	0.000164	0.006231
ADAM17	6868	73747889	NP_003174.3	103	Yes	Yes	9	NES	VVVVDGK	ESEYTVK	No	High	[K].VVVVDGKNESEYTVK.[W]	3xTMT6plex [N-Term; K7; K15]; 1xDeamidated [N8(100)]	0.0146118	0	1	2	3	73747889	73747889 [96-110]	1	2354.34	N8(Deamidated): 100	20.5	33.4	11.1	21.1	24.5	26.3	21.6667	23.9667	1.10615	#N/A	Unique	1.78404	High	0	0.0012
ADAM17	6868	73747889	NP_003174.3	264	Yes	Yes	2	NTS	RVDDIYR	TSWDNAG	No	High	[R].NTSWDNAGFK.[G]	1xTMT6plex [K10]; 1xDeamidated [N6(99.5)]	0.180416	0.00650338	1	3	2	73747889	73747889 [264-273]	0	1369.66	N1(Deamidated): 99.61	16.1	18	14	11.5	17.7	16.7	16.0333	15.3	0.954262	#N/A	Unique	1.70673	High	0.007215	0.1218
ADAM8	101	1034565902	XP_016870954.1	156	Yes	Yes	16	NGS	TETYTAA	GSEVTEQ	No	High	[R].DLLGSGYTETYTAANGSEVTEQPR.[G]	1xTMT6plex [N-Term]; 1xDeamidated [N15(100)]	0.000951608	0	1	5	3	1034565902	1034565902 [142-165]	0	2789.33	N15(Deamidated): 100	4.1	4.8	5.8	6.1	5.4	3.7	4.9	5.06667	1.03401	#N/A	Unique	2.30118	High	0	3.284e-05
ADAM9	8754	1034661881	XP_016869431.1	146	Yes	Yes	8	NAS	RGLLHLE	ASYGIEP	No	High	[R].GLLHLENASYGIEPLQNSSHFEHIIYR.[M]	1xTMT6plex [N-Term]; 2xDeamidated [N7(100); N17(100)]	0.176532	0.00554469	1	3	1	1034661881	1034661881 [140-166]	0	3368.71	N7(Deamidated): 100; N17(Deamidated): 100	8.3	6.9	7.9	13.9	7.9	10.1	7.7	10.6333	1.38095	#N/A	Unique	1.1771	High	0.001833	0.04481
ADAMTSL1	92949	767955388	XP_011516365.1	1150	Yes	Yes	9	NLS	RLDDILG	LSQQPEE	No	High	[R].RLDDILGNLSQQPEELR.[D]	1xTMT6plex [N-Term]; 1xDeamidated [N8(100)]	8.86353e-08	0	1	10	3	767955388	767955388 [1143-1159]	1	2226.19	N8(Deamidated): 100	14.6	4.4	4.4	6.1	4.7	7.2	7.8	6	0.769231	#N/A	Unique	3.79545	High	0	5.143e-11
ADGRE5	976	17978491	NP_510966.1	237	Yes	Yes	15	NQT	WSLLKKF	STQIAAM	No	High	[K].YSEFTSTTSGTGHNQTR.[AN]	1xTMT6plex [N-Term]; 1xDeamidated [N14(100)]	0.00074872	0	1	4	3	17978491	17978491 [810-826]	0	2103.98	N14(Deamidated): 100	10.5	6.7	5.6	9.5	6.4	7.7	7.6	7.86667	1.03509	1.13	Unique	2.39046	High	0	3.648e-05
ADGRE5	976	17978491	NP_510966.1	371	Yes	Yes	5	NVT	IQERGDK	VTMGQSS	Yes	High	[R].GDKNVTMGQSSAR.[M]	1xTMT6plex [K3]; 1xOxidation [M7(100)]; 1xDeamidated [N4(100)]	0.0014305	0	1	4	3	17978491	17978491 [368-380]	1	1596.78	N4(Deamidated): 100; M7(Oxidation): 100	15.2	7.5	8.9	8.8	14.6	16.2	10.5333	13.2	1.25316	1.13	Unique	2.31156	High	0	4.49e-05
ADGRE5	976	17978491	NP_510966.1	371	Yes	Yes	5	NVT	IQERGDK	VTMGQSS	Yes	High	[R].GDKNVTMGQSSAR.[M]	2xTMT6plex [N-Term; K3]; 1xOxidation [M7(100)]; 1xDeamidated [N4(100)]	0.0236164	0	1	4	4	17978491	17978491 [368-380]	1	1825.95	N4(Deamidated): 100; M7(Oxidation): 100	204	28.9	51.2	4	112.9	154.7	94.7	90.5333	0.956001	1.13	Unique	1.98656	High	0	0.002813
ADGRE5	976	17978491	NP_510966.1	453	Yes	Yes	13	NNT	NSIFLSH	NTKELNS	Yes	High	[R].LSAVNSIFLSHNNTK.[E]	2xTMT6plex [N-Term; K15]; 2xDeamidated [N5(100); N]	3.84594e-06	0	1	4	4	17978491	17978491 [442-456]	0	2105.16	N5(Deamidated): 100; N12(Deamidated): 99.88	22.4	9.8	8.7	15.9	12.8	17.9	13.6333	15.5333	1.13936	1.13	Unique	3.67069	High	0	1.057e-08
ADGRE5	976	17978491	NP_510966.1	453	Yes	Yes	13	NNT	NSIFLSH	NTKELNS	Yes	High	[R].LSAVNSIFLSHNNTK.[E]	2xTMT6plex [N-Term; K15]; 1xDeamidated [N12(99.4)]	3.791e-06	0	1	4	5	17978491	17978491 [442-456]	0	2104.18	N12(Deamidated): 99.78	13.1	6.7	6.3	11.3	8.9	13.3	8.7	11.1667	1.28352	1.13	Unique	3.66832	High	0	1.039e-08
ADGRE5	976	17978491	NP_510966.1	453	Yes	Yes	13	NNT	NSIFLSH	NTKELNS	Yes	High	[R].LSAVNSIFLSHNNTK.[E]	1xTMT6plex [K15]; 2xDeamidated [N5(100); N]	0.0200043	0	1	4	1	17978491	17978491 [442-456]	0	1876	N5(Deamidated): 100; N12(Deamidated): 50; N13(Deamidated): 50	8.8	4.2	6	4.6	5.9	4.9	6.33333	5.13333	0.810526	1.13	Unique	2.12636	High	0	0.001878
ADGRE5	976	17978491	NP_510966.1	453	Yes	Yes	13	NNT	NSIFLSH	NTKELNS	Yes	High	[R].LSAVNSIFLSHNNTK.[E]	1xTMT6plex [K15]; 1xDeamidated [N12(99.7)]	0.000166865	0	1	4	6	17978491	17978491 [442-456]	0	1875.02	N12(Deamidated): 99.7	12.7	5.9	6.2	9.1	8.4	9.7	8.26667	9.06667	1.09677	1.13	Unique	3.44452	High	0	3.823e-06
ADGRE5	976	17978491	NP_510966.1	453	Yes	Yes	14	NNT	NSIFLSH	NTKELNS	Yes	High	[R].RLSAVNSIFLSHNNTK.[E]	1xTMT6plex [K16]; 1xDeamidated [N13(99.4)]	0.0860121	0.00222925	1	4	5	17978491	17978491 [441-456]	1	2031.12	N13(Deamidated): 99.33	12.9	9.7	8.4	13.5	8.8	11.5	10.3333	11.2667	1.09032	1.13	Unique	1.42778	High	0.004728	0.0837
ADGRG1	9289	578829377	XP_006721403.1	329	Yes	Yes	4	NLT	VQNTKVA	LTEPVVL	No	High	[K].VANLTEPVVLTFQHQLQPK.[N]	2xTMT6plex [N-Term; K19]; 1xDeamidated [N3(100)]	8.81854e-06	0	1	7	1	578829377	578829377 [327-345]	0	2621.51	N3(Deamidated): 100	282.4	453.6	238.4	290.9	243.4	279	324.8	271.1	0.834667	#N/A	Unique	5.42756	High	0	3.421e-08
ADGRG1	9289	578829377	XP_006721403.1	329	Yes	Yes	4	NLT	VQNTKVA	LTEPVVL	No	High	[K].VANLTEPVVLTFQHQLQPK.[N]	1xTMT6plex [K19]; 1xDeamidated [N3(100)]	0.0105091	0	1	7	4	578829377	578829377 [327-345]	0	2392.34	N3(Deamidated): 100	8.9	20.8	8.2	10.4	9.3	9.9	12.6333	9.86667	0.781003	#N/A	Unique	2.2332	High	0	0.003718
ADGRG6	57211	578812844	XP_006715579.1	668	Yes	Yes	5	NST	LAFKIDL	STSHVNI	No	High	[K].IDLNSTSHVNITTR.[N]	1xTMT6plex [N-Term]; 2xDeamidated [N4(100); N10(100)]	0.0229546	0	1	10	2	578812844	578812844 [665-678]	0	1801.95	N4(Deamidated): 100; N10(Deamidated): 100	10.7	6.1	8.2	6	3.9	6.5	8.33333	5.46667	0.656	#N/A	Unique	1.82834	High	0	0.002281
ADGRG6	57211	578812844	XP_006715579.1	506	Yes	Yes	6	NES	QQKLLKN	ESLDEGL	No	High	[K].LLKNNESLDEGLR.[L]	2xTMT6plex [N-Term; K3]; 1xDeamidated [N5(99.7)]	0.0013505	0	1	10	7	578812844	578812844 [502-514]	1	1960.11	N5(Deamidated): 99.71	20.1	11.6	47	16.5	10.4	8.2	26.2333	11.7	0.445997	#N/A	Unique	1.90311	High	0.0003202	0.01139
ADGRG6	57211	578812844	XP_006715579.1	506	Yes	Yes	3	NES	QQKLLKN	ESLDEGL	No	High	[K].NNESLDEGLR.[L]	1xTMT6plex [N-Term]; 1xDeamidated [N2(99.7)]	0.0643627	0.000598249	1	10	2	578812844	578812844 [505-514]	0	1376.69	N2(Deamidated): 99.77	38.5	21.6	42.4	34.4	26.6	20.1	34.1667	27.0333	0.79122	#N/A	Unique	1.93369	High	0.000164	0.01009
ADGRG6	57211	578812844	XP_006715579.1	751	Yes	Yes	8	NKT	RAQFTFF	KTGLFQD	No	High	[R].AQFTFFNK.[T]	2xTMT6plex [N-Term; K8]; 1xDeamidated [N7(100)]	0.0016127	0	1	10	4	578812844	578812844 [745-752]	0	1461.81	N7(Deamidated): 100	26.5	18.4	73.6	16.7	16.4	12	39.5	15.0333	0.380591	#N/A	Unique	2.64223	High	0	5.322e-05
ADGRL2	23266	1034556984	XP_016856271.1	736	Yes	Yes	11	NAT	GQFLSTE	ATIKLGA	No	High	[R].SLGQFLSTENATIK.[L]	2xTMT6plex [N-Term; K14]; 1xDeamidated [N10(100)]	0.000793073	0	1	17	1	1034556984	1034556984 [727-740]	0	1968.11	N10(Deamidated): 100	7.3	3.4	4.9	6.3		13.6	5.2	9.95	1.91346	#N/A	Unique	2.25224	High	0	1.957e-05
ALCAM	214	68163411	NP_001618.2	499	Yes	Yes	7	NVS	ERTVNSL	VSAISIP	Yes	High	[R].TVNSLNVSAISIPEHDEADEISDENR.[E]	1xTMT6plex [N-Term]; 2xDeamidated [N3(100); N6(100)]	0.00504879	0	1	2	1	68163411	68163411 [494-519]	0	3085.46	N3(Deamidated): 100; N6(Deamidated): 100	9.9	5.9	5.6	6.3	2.6	11.5	7.13333	6.8	0.953271	1.64	Unique	2.03331	High	0	0.0002675
ALCAM	214	68163411	NP_001618.2	499	Yes	Yes	7	NVS	ERTVNSL	VSAISIP	Yes	High	[R].TVNSLNVSAISIPEHDEADEISDENR.[E]	1xTMT6plex [N-Term]; 1xDeamidated [N]	4.88836e-06	0	1	2	9	68163411	68163411 [494-519]	0	3084.48	N6(Deamidated): 100	8.8	9.2	11	12.4	8.7	14.1	9.66667	11.7333	1.21379	1.64	Unique	3.6615	High	0	1.711e-08
ALCAM	214	68163411	NP_001618.2	499	Yes	Yes	7	NVS	ERTVNSL	VSAISIP	Yes	High	[R].TVNSLNVSAISIPEHDEADEISDENREK.[V]	2xTMT6plex [N-Term; K28]; 3xDeamidated [N3(100); N6(100); N25(100)]	0.00194436	0	1	2	4	68163411	68163411 [494-521]	1	3572.75	N3(Deamidated): 100; N6(Deamidated): 100; N25(Deamidated): 100	7.6	6.1	4.9	7.2	6.6	10.2	6.2	8	1.29032	1.64	Unique	2.13843	High	0	6.931e-05
ALCAM	214	68163411	NP_001618.2	499	Yes	Yes	7	NVS	ERTVNSL	VSAISIP	Yes	High	[R].TVNSLNVSAISIPEHDEADEISDENREK.[V]	2xTMT6plex [N-Term; K28]; 2xDeamidated [N6(100); N25(100)]	2.25988e-11	0	1	2	1	68163411	68163411 [494-521]	1	3571.77	N3(Deamidated): 50; N6(Deamidated): 100; N25(Deamidated): 50	10.3	7.6	8.6	9.8	14.3	37	8.83333	20.3667	2.30566	1.64	Unique	3.8084	High	0	4.358e-16
ALCAM	214	68163411	NP_001618.2	499	Yes	Yes	7	NVS	ERTVNSL	VSAISIP	Yes	High	[R].TVNSLNVSAISIPEHDEADEISDENREK.[V]	2xTMT6plex [N-Term; K28]; 1xDeamidated [N6(100)]	1.59178e-09	0	1	2	1	68163411	68163411 [494-521]	1	3570.78	N6(Deamidated): 100	8	8	6.1	8.9	7.7	26.9	7.36667	14.5	1.96833	1.64	Unique	3.81789	High	0	1.765e-13
ALCAM	214	68163411	NP_001618.2	499	Yes	Yes	7	NVS	ERTVNSL	VSAISIP	Yes	High	[R].TVNSLNVSAISIPEHDEADEISDENREK.[V]	1xTMT6plex [K28]; 2xDeamidated [N25(100); N]	0.0892198	0.00222925	1	2	1	68163411	68163411 [494-521]	1	3342.6	N3(Deamidated): 50; N6(Deamidated): 50; N25(Deamidated): 100	9.3	10.2	10.7	11.2	11.8	20.3	10.0667	14.4333	1.43377	1.64	Unique	1.69434	High	0.0005939	0.01625
ALCAM	214	68163411	NP_001618.2	499	Yes	Yes	7	NVS	ERTVNSL	VSAISIP	Yes	High	[R].TVNSLNVSAISIPEHDEADEISDENREK.[V]	1xTMT6plex [K28]; 1xDeamidated [N]	0.0071302	0	1	2	2	68163411	68163411 [494-521]	1	3341.62	N25(Deamidated): 100	9.9	7.9	10.9	8.4	14.4	23.2	9.56667	15.3333	1.60279	1.64	Unique	2.42787	High	0	0.0004346
ALCAM	214	343168770	NP_001230209.1	499	Yes	Yes	7	NVS	ERTVNSL	VSANENR	Yes	High	[R].TVNSLNVSANENR.[E]	1xTMT6plex [N-Term]; 2xDeamidated [N3(100); N]	0.00414772	0	1	1	2	343168770	343168770 [494-506]	0	1648.83	N3(Deamidated): 100; N6(Deamidated): 100	14.2	11.6	10.8	21.8	16.2	26.5	12.2	21.5	1.7623	#N/A	Unique	2.16575	High	0	0.002648
ALCAM	214	343168770	NP_001230209.1	499	Yes	Yes	7	NVS	ERTVNSL	VSANENR	Yes	High	[R].TVNSLNVSANENR.[E]	1xTMT6plex [N-Term]; 1xDeamidated [N6(99.4)]	0.000654638	0	1	1	7	343168770	343168770 [494-506]	0	1647.85	N6(Deamidated): 100	20.6	16.1	10.7	16.4	16.5	27.5	15.8	20.1333	1.27426	#N/A	Unique	2.42649	High	0	1.492e-05
AMIGO2	347902	219521831	NP_001137140.1	104	Yes	Yes	4	NIT	TLILRHN	ITSISTG	No	High	[R].HNNITSISTGSFSTTPNLK.[C]	2xTMT6plex [N-Term; K19]; 2xDeamidated [N2(100); N3(100)]	3.11508e-08	0	1	1	7	219521831	219521831 [102-120]	0	2479.31	N2(Deamidated): 100; N3(Deamidated): 100	21	36.6	15.9	38.6	18.1	25	24.5	27.2333	1.11156	#N/A	Unique	4.17402	High	0	1.174e-11
AMIGO2	347902	219521831	NP_001137140.1	104	Yes	No	4	NIT	TLILRHN	ITSISTG	No	High	[R].HNNITSISTGSFSTTPNLK.[C]	2xTMT6plex [N-Term; K19]; 1xDeamidated [N]	0.000255713	0	1	1	2	219521831	219521831 [102-120]	0	2478.32	N2(Deamidated): 50; N3(Deamidated): 50	12.4	17	10.7	17.7	7.9	13.3	13.3667	12.9667	0.970075	#N/A	Unique	2.67208	High	0	3.957e-06
AMIGO2	347902	219521831	NP_001137140.1	104	Yes	Yes	4	NIT	TLILRHN	ITSISTG	No	High	[R].HNNITSISTGSFSTTPNLK.[C]	1xTMT6plex [K19]; 2xDeamidated [N2(100); N3(100)]	0.000144502	0	1	1	9	219521831	219521831 [102-120]	0	2250.15	N2(Deamidated): 100; N3(Deamidated): 100	18.3	25.7	13	25.2	14	15.3	19	18.1667	0.95614	#N/A	Unique	2.79903	High	0	2.265e-06
AMIGO2	347902	219521831	NP_001137140.1	104	Yes	Yes	4	NIT	TLILRHN	ITSISTG	No	High	[R].HNNITSISTGSFSTTPNLK.[C]	1xTMT6plex [K19]; 1xDeamidated [N3(99.5)]	0.0193501	0	1	1	4	219521831	219521831 [102-120]	0	2249.16	N3(Deamidated): 99.54	11.7	14.6	5.3	12.5	9.9	11	10.5333	11.1333	1.05696	#N/A	Unique	1.94669	High	0	0.002523
AMIGO2	347902	219521831	NP_001137140.1	345	Yes	Yes	17	NGS	ENFYVFH	GSLVIES	No	High	[R].LLEPDKEMENFYVFHNGSLVIESPR.[F]	2xTMT6plex [N-Term; K6]; 1xOxidation [M8(100)]; 2xDeamidated [N10(100); N16(100)]	9.20893e-07	0	1	1	1	219521831	219521831 [330-354]	1	3439.75	M8(Oxidation): 100; N10(Deamidated): 100; N16(Deamidated): 100	8.6	23	7.5	21.9	6.1	10.1	13.0333	12.7	0.974425	#N/A	Unique	4.60892	High	0	1.405e-09
AMIGO2	347902	219521831	NP_001137140.1	345	Yes	Yes	17	NGS	ENFYVFH	GSLVIES	No	High	[R].LLEPDKEMENFYVFHNGSLVIESPR.[F]	2xTMT6plex [N-Term; K6]; 1xOxidation [M8(100)]; 1xDeamidated [N16(100)]	1.18798e-09	0	1	1	3	219521831	219521831 [330-354]	1	3438.77	M8(Oxidation): 100; N16(Deamidated): 100	136.4	231.7	77.8	314.6	98.1	108.9	148.633	173.867	1.16977	#N/A	Unique	8.36964	High	0	1.167e-13
ANGPTL4	51129	530427514	XP_005272541.1	177	Yes	Yes	15	NVS	QPVDPAH	VSRLHRL	Yes	High	[K].RLPEMAQPVDPAHNVSR.[L]	1xTMT6plex [N-Term]; 1xOxidation [M5(100)]; 1xDeamidated [N14(100)]	0.00233299	0	1	4	6	530427514	530427514 [164-180]	1	2163.12	M5(Oxidation): 100; N14(Deamidated): 100	10.3	6.4	5.9	8	8.5	8.3	7.53333	8.26667	1.09735	#N/A	Unique	1.85213	High	0	8.995e-05
ANGPTL4	51129	530427514	XP_005272541.1	177	Yes	Yes	14	NVS	QPVDPAH	VSRLHRL	Yes	High	[R].LPEMAQPVDPAHNVSR.[L]	1xTMT6plex [N-Term]; 1xOxidation [M4(100)]; 1xDeamidated [N13(100)]	1.5985e-05	0	1	4	4	530427514	530427514 [165-180]	0	2007.02	M4(Oxidation): 100; N13(Deamidated): 100	8.9	5.2	7	7.8	6.9	7	7.03333	7.23333	1.02844	#N/A	Unique	2.96914	High	0	7.923e-08
ANO6	196527	325651853	NP_001191732.1	382	Yes	Yes	3	NIT	LCPFWKL	ITCESSK	No	High	[K].LNITCESSK.[K]	1xCarbamidomethyl [C5]; 2xTMT6plex [N-Term; K9]; 1xDeamidated [N2(100)]	0.043754	0	1	6	2	325651853	325651853 [381-389]	0	1510.82	N2(Deamidated): 100	28	37.9	28.1	10.2	24.3	48.1	31.3333	27.5333	0.878723	0.91	Unique	2.1282	High	0	0.00577
ANO6	196527	325651853	NP_001191732.1	382	Yes	Yes	3	NIT	LCPFWKL	ITCESSK	No	High	[K].LNITCESSK.[K]	1xCarbamidomethyl [C5]; 1xTMT6plex [K9]; 1xDeamidated [N2(100)]	0.185175	0.00650338	1	6	1	325651853	325651853 [381-389]	0	1281.66	N2(Deamidated): 100	11.5	13.2	12.7	8.4	11.3	11.7	12.4667	10.4667	0.839572	0.91	Unique	1.29071	High	0.002073	0.048
ANO6	196527	325651853	NP_001191732.1	514	Yes	Yes	4	NGT	AKLPKNI	GTDPIQK	No	High	[K].NINGTDPIQK.[Y]	2xTMT6plex [N-Term; K10]; 1xDeamidated [N3(99.7)]	0.000988826	0	1	6	5	325651853	325651853 [512-521]	0	1558.88	N3(Deamidated): 100	24.8	44.6	27.3	16.6	20.1	55.3	32.2333	30.6667	0.951396	0.91	Unique	2.81641	High	0	0.0001656
ANO6	196527	325651853	NP_001191732.1	514	Yes	Yes	4	NGT	AKLPKNI	GTDPIQK	No	High	[K].NINGTDPIQK.[Y]	1xTMT6plex [K10]; 1xDeamidated [N3(100)]	0.0102607	0	1	6	5	325651853	325651853 [512-521]	0	1329.72	N3(Deamidated): 100	28.4	46.8	34.6	23.3	27.6	54.2	36.6	35.0333	0.957195	0.91	Unique	2.73159	High	0	0.0007271
ANO6	196527	325651853	NP_001191732.1	811	Yes	Yes	7	NKS	FKVADFK	KSKGNPY	No	High	[K].VADFKNK.[S]	2xTMT6plex [K5; K7]; 1xDeamidated [N6(100)]	0.0206803	0	1	6	2	325651853	325651853 [806-812]	1	1280.76	N6(Deamidated): 100	3.1	15.3	6.6	5.4	4.5	8.8	8.33333	6.23333	0.748	0.91	Unique	1.60993	High	0	0.001964
ANPEP	290	530407092	XP_005254949.1	234	Yes	Yes	5	NIT	PAMKAEF	ITLIHPK	Yes	High	[K].AEFNITLIHPK.[D]	2xTMT6plex [N-Term; K11]; 1xDeamidated [N4(100)]	0.000439667	0	1	1	9	530407092	530407092 [231-241]	0	1742.03	N4(Deamidated): 100	138	10.4	11.9	15.8	10.5	15.1	53.4333	13.8	0.258266	0.41	Unique	2.88373	High	0	4.248e-05
ANPEP	290	530407092	XP_005254949.1	265	Yes	Yes	14	NVT	LPEDPNW	VTEFHTT	Yes	High	[K].GPSTPLPEDPNWNVTEFHTTPK.[M]	2xTMT6plex [N-Term; K22]; 1xDeamidated [N]	8.20633e-06	0	1	1	12	530407092	530407092 [253-274]	0	2923.49	N13(Deamidated): 99.72	60	6.8	5.2	8.8	7.8	5.9	24	7.5	0.3125	0.41	Unique	3.35434	High	0	3.089e-08
ANPEP	290	530407092	XP_005254949.1	128	Yes	Yes	4	NYT	IIHSKKL	YTLSQGH	Yes	High	[K].KLNYTLSQGHR.[V]	1xTMT6plex [K1]; 1xDeamidated [N3(100)]	0.00136352	0	1	1	12	530407092	530407092 [126-136]	1	1546.85	N3(Deamidated): 100	62.3	10.2	7.7	13.3	10.8	15.5	26.7333	13.2	0.493766	0.41	Unique	2.79255	High	0	6.205e-05
ANPEP	290	530407092	XP_005254949.1	128	Yes	Yes	4	NYT	IIHSKKL	YTLSQGH	Yes	High	[K].KLNYTLSQGHR.[V]	2xTMT6plex [K1; N-Term]; 1xDeamidated [N3(100)]	0.000174226	0	1	1	16	530407092	530407092 [126-136]	1	1776.02	N3(Deamidated): 100	615.5	17.3	21.3	13.8	17.3	23.4	218.033	18.1667	0.0833206	0.41	Unique	2.99399	High	0	2.301e-06
ANPEP	290	530407092	XP_005254949.1	128	Yes	Yes	3	NYT	IIHSKKL	YTLSQGH	Yes	High	[K].LNYTLSQGHR.[V]	1xTMT6plex [N-Term]; 1xDeamidated [N2(100)]	0.0274755	0	1	1	3	530407092	530407092 [127-136]	0	1418.76	N2(Deamidated): 100	24.9	8.1	9.4	11.5	6	7.9	14.1333	8.46667	0.599057	0.41	Unique	1.89921	High	0	0.002949
ANPEP	290	530407092	XP_005254949.1	681	Yes	Yes	9	NNT	VPVTLAL	NTLFLIE	Yes	High	[K].VPVTLALNNTLFLIEER.[Q]	1xTMT6plex [N-Term]; 1xDeamidated [N8(99.8)]	2.83053e-09	0	1	1	8	530407092	530407092 [674-690]	0	2172.25	N8(Deamidated): 99.82	181.7	19.2	22.7	23.5	24.9	28.3	74.5333	25.5667	0.343023	0.41	Unique	6.76379	High	0	2.184e-12
ANPEP	290	530407092	XP_005254949.1	818	Yes	Yes	2	NAT	FAWEQFR	ATLVNEA	Yes	High	[R].NATLVNEADK.[L]	1xTMT6plex [K10]; 1xDeamidated [N1(100)]	0.013538	0	1	1	4	530407092	530407092 [818-827]	0	1304.69	N1(Deamidated): 100	59.2	9.9	8.3	11.4	10.8	12.8	25.8	11.6667	0.452196	0.41	Unique	2.39833	High	0	0.005733
ANPEP	290	530407092	XP_005254949.1	818	Yes	Yes	2	NAT	FAWEQFR	ATLVNEA	Yes	High	[R].NATLVNEADKLR.[A]	1xTMT6plex [K10]; 2xDeamidated [N1(100); N6(100)]	0.00507305	0	1	1	11	530407092	530407092 [818-829]	1	1574.86	N1(Deamidated): 100; N6(Deamidated): 100	108	16.2	13.2	17.1	19.7	20.9	45.8	19.2333	0.419942	0.41	Unique	2.11386	High	0	0.0002683
ANPEP	290	530407092	XP_005254949.1	818	Yes	Yes	2	NAT	FAWEQFR	ATLVNEA	Yes	High	[R].NATLVNEADKLR.[A]	1xTMT6plex [K10]; 1xDeamidated [N1(100)]	2.76183e-05	0	1	1	11	530407092	530407092 [818-829]	1	1573.87	N1(Deamidated): 100	271	19.1	13.7	11.9	13.8	18.5	101.267	14.7333	0.14549	0.41	Unique	3.00519	High	0	1.706e-07
ANTXR1	84168	14149904	NP_115584.1	184	Yes	Yes	4	NET	CVGVKDF	ETQLARI	Yes	High	[K].DFNETQLAR.[I]	1xTMT6plex [N-Term]; 1xDeamidated [N3(100)]	0.012423	0	1	6	2	14149904	14149904 [182-190]	0	1323.67	N3(Deamidated): 100	27.1	14.4	22.2	13.3	24.6	15.8	21.2333	17.9	0.843014	#N/A	Unique	2.47666	High	0	0.000951
APLP2	334	4502147	NP_001633.1	541	Yes	Yes	3	NQS	HVIEERR	QSLSLLY	No	High	[R].RNQSLSLLYK.[V]	2xTMT6plex [N-Term; K10]; 1xDeamidated [N2(100)]	0.0247613	0	1	5	2	4502147	4502147 [540-549]	1	1681	N2(Deamidated): 100	14	9.9	8.4	4.1	15.8	11.5	10.7667	10.4667	0.972136	#N/A	Unique	2.44284	High	0	0.002547
APMAP	57136	24308201	NP_065392.1	196	Yes	Yes	2	NMS	ETPIEGK	MSFVNDL	Yes	High	[K].NMSFVNDLTVTQDGR.[K]	1xTMT6plex [N-Term]; 1xOxidation [M2(100)]; 1xDeamidated [N1(100)]	0.000191767	0	1	2	17	24308201	24308201 [196-210]	0	1942.94	N1(Deamidated): 100; M2(Oxidation): 100	114.9	132.9	118.5	114.8	93.1	256.5	122.1	154.8	1.26781	1.06	Unique	3.19155	High	0	1.713e-05
APMAP	57136	24308201	NP_065392.1	196	Yes	Yes	2	NMS	ETPIEGK	MSFVNDL	Yes	High	[K].NMSFVNDLTVTQDGRK.[I]	2xTMT6plex [N-Term; K16]; 1xOxidation [M2(100)]; 1xDeamidated [N1(100)]	0.0120145	0	1	2	2	24308201	24308201 [196-211]	1	2300.2	N1(Deamidated): 100; M2(Oxidation): 100	22.1	31.9	24.4	35.5	17.4	45.4	26.1333	32.7667	1.25383	1.06	Unique	1.31699	High	0	0.0009123
APMAP	57136	24308201	NP_065392.1	196	Yes	Yes	2	NMS	ETPIEGK	MSFVNDL	Yes	High	[K].NMSFVNDLTVTQDGRK.[I]	1xTMT6plex [K16]; 1xOxidation [M2(100)]; 2xDeamidated [N1(100); N6(100)]	0.000199268	0	1	2	4	24308201	24308201 [196-211]	1	2072.02	N1(Deamidated): 100; M2(Oxidation): 100; N6(Deamidated): 100	10.3	12.8	13.3	11.4	9.9	14.6	12.1333	11.9667	0.986264	1.06	Unique	2.96937	High	0	2.776e-06
APMAP	57136	24308201	NP_065392.1	196	Yes	Yes	2	NMS	ETPIEGK	MSFVNDL	Yes	High	[K].NMSFVNDLTVTQDGRK.[I]	1xTMT6plex [K16]; 1xOxidation [M2(100)]; 1xDeamidated [N1(100)]	1.282e-05	0	1	2	7	24308201	24308201 [196-211]	1	2071.03	N1(Deamidated): 100; M2(Oxidation): 100	15.4	16.2	14.3	18.5	14	22.1	15.3	18.2	1.18954	1.06	Unique	2.83536	High	0	5.796e-08
APMAP	57136	24308201	NP_065392.1	160	Yes	Yes	5	NGT	LGIRAGP	GTLFVAD	Yes	High	[R].AGPNGTLFVADAYK.[G]	2xTMT6plex [N-Term; K14]; 1xDeamidated [N4(100)]	1.5837e-07	0	1	2	7	24308201	24308201 [157-170]	0	1883.03	N4(Deamidated): 100	46.4	29	45.6	31.5	44.9	52.8	40.3333	43.0667	1.06777	1.06	Unique	5.11825	High	0	1.17e-10
APMAP	57136	24308201	NP_065392.1	160	Yes	Yes	5	NGT	LGIRAGP	GTLFVAD	Yes	High	[R].AGPNGTLFVADAYK.[G]	1xTMT6plex [K14]; 1xDeamidated [N4(100)]	3.2824e-05	0	1	2	9	24308201	24308201 [157-170]	0	1653.87	N4(Deamidated): 100	103.7	166.6	141.5	179.5	103.6	219	137.267	167.367	1.21928	1.06	Unique	3.48124	High	0	2.176e-07
APP	351	4502167	NP_000475.1	571	Yes	Yes	4	NYS	ELLQKEQ	YSDDVLA	No	High	[K].EQNYSDDVLANMISEPR.[I]	1xTMT6plex [N-Term]; 1xOxidation [M12(100)]; 1xDeamidated [N3(100)]	0.00138993	0	1	10	4	4502167	4502167 [569-585]	0	2227.04	N3(Deamidated): 100; M12(Oxidation): 100	17.1	19.1	19.1	22.9	15.6	21.1	18.4333	19.8667	1.07776	0.85	Unique	2.27462	High	0	4.319e-05
ASAH1	427	189011546	NP_004306.3	364	Yes	Yes	6	NIS	LNRTSQE	ISFETMY	No	High	[R].TSQENISFETMYDVLSTKPVLNK.[L]	3xTMT6plex [N-Term; K18; K23]; 1xOxidation [M11(100)]; 1xDeamidated [N5(100)]	0.0990973	0.00222925	1	4	1	189011546	189011546 [360-382]	0	3348.79	N5(Deamidated): 100; M11(Oxidation): 100	8.2	10.7	16.3	19.4	10.5	19	11.7333	16.3	1.3892	0.8	Unique	2.19385	High	0.0005939	0.01902
ASAH1	427	189011546	NP_004306.3	275	Yes	Yes	6	NST	LTRTVLE	STSYEEA	No	High	[R].TVLENSTSYEEAK.[N]	2xTMT6plex [N-Term; K13]; 1xDeamidated [N5(100)]	3.54581e-08	0	1	4	9	189011546	189011546 [271-283]	0	1930.01	N5(Deamidated): 100	107.3	141.4	347.5	52	137.3	100.5	198.733	96.6	0.486078	0.8	Unique	5.76506	High	0	1.411e-11
ASAH1	427	189011546	NP_004306.3	275	Yes	Yes	6	NST	LTRTVLE	STSYEEA	No	High	[R].TVLENSTSYEEAK.[N]	1xTMT6plex [K13]; 1xDeamidated [N5(100)]	0.000230106	0	1	4	10	189011546	189011546 [271-283]	0	1700.84	N5(Deamidated): 100	48.7	56.7	154.9	30.8	69	33.3	86.7667	44.3667	0.511333	0.8	Unique	4.08324	High	0	3.407e-06
ASPH	444	1034660280	XP_016868908.1	93	Yes	Yes	6	NLS	KAKDFRY	LSEVLQG	No	High	[K].DFRYNLSEVLQGK.[L]	2xTMT6plex [N-Term; K13]; 1xDeamidated [N5(100)]	0.00340746	0	1	29	1	1034660280	1034660280 [89-101]	1	2028.12	N5(Deamidated): 100	5.1	6.8	5.3	21.5	5.8	13.9	5.73333	13.7333	2.39535	1.18	Unique	1.92233	High	0	0.0001532
ASPH	444	1034660280	XP_016868908.1	12	Yes	Yes	5	NSS	KNAKSSG	SSSSGSG	No	High	[K].SSGNSSSSGSGSGSTSAGSSSPGAR.[R]	1xTMT6plex [N-Term]; 1xDeamidated [N4(100)]	4.72833e-08	0	1	32	3	1034660280	1034660280 [9-33]	0	2333.03	N4(Deamidated): 100			3.4	5	3.5		3.4	4.25	1.25	1.18	Unique	4.69659	High	0	2.121e-11
ASPH	444	1034660280	XP_016868908.1	467	Yes	Yes	8	NDT	RLVQLFP	DTSLKND	No	High	[R].LVQLFPNDTSLK.[N]	2xTMT6plex [N-Term; K12]; 1xDeamidated [N7(100)]	4.01499e-05	0	1	40	2	1034660280	1034660280 [461-472]	0	1834.07	N7(Deamidated): 100	286.3	571.3	404.6	203.7	816.1	359.2	420.733	459.667	1.09254	1.18	Unique	4.619	High	0	2.892e-07
ASPH	444	1034660280	XP_016868908.1	467	Yes	Yes	8	NDT	RLVQLFP	DTSLKND	No	High	[R].LVQLFPNDTSLK.[N]	1xTMT6plex [K12]; 1xDeamidated [N7(100)]	0.000583463	0	1	40	4	1034660280	1034660280 [461-472]	0	1604.91	N7(Deamidated): 100	15.3	16.2	14.4	12	23.7	15.6	15.3	17.1	1.11765	1.18	Unique	2.71087	High	0	3.57e-05
ASPH	444	1034660280	XP_016868908.1	93	Yes	Yes	3	NLS	KAKDFRY	LSEVLQG	No	High	[R].YNLSEVLQGK.[L]	2xTMT6plex [N-Term; K10]; 1xDeamidated [N2(100)]	5.20289e-06	0	1	29	5	1034660280	1034660280 [92-101]	0	1609.92	N2(Deamidated): 100	16.8	41	25.5	31.9	61.1	25.9	27.7667	39.6333	1.42737	1.18	Unique	3.46205	High	0	1.617e-08
ASPH	444	1034660280	XP_016868908.1	93	Yes	Yes	3	NLS	KAKDFRY	LSEVLQG	No	High	[R].YNLSEVLQGK.[L]	1xTMT6plex [K10]; 1xDeamidated [N2(100)]	0.013282	0	1	29	4	1034660280	1034660280 [92-101]	0	1380.76	N2(Deamidated): 100	9.4	12.9	11	11	19.1	9.1	11.1	13.0667	1.17718	1.18	Unique	2.21954	High	0	0.001049
ATP1B1	481	4502277	NP_001668.1	265	Yes	Yes	13	NLT	LLAVQFT	LTMDTEI	Yes	High	[K].YLQPLLAVQFTNLTMDTEIR.[I]	1xTMT6plex [N-Term]; 1xOxidation [M15(100)]; 1xDeamidated [N12(100)]	2.84331e-07	0	1	1	2	4502277	4502277 [254-273]	0	2612.38	N12(Deamidated): 100; M15(Oxidation): 100	48.3	37.3	35.5	33.1	52	53.3	40.3667	46.1333	1.14286	0.94	Unique	5.22263	High	0	2.672e-10
ATP6AP1	537	17136148	NP_001174.2	261	Yes	Yes	15	NDT	IHPPVSY	DTAPRIL	Yes	High	[K].QPVSPVIHPPVSYNDTAPR.[I]	1xTMT6plex [N-Term]; 1xDeamidated [N14(100)]	8.0539e-09	0	1	2	6	17136148	17136148 [248-266]	0	2304.22	N14(Deamidated): 100	24.4	18.5	22.4	18.9	22.1	22.1	21.7667	21.0333	0.966309	#N/A	Unique	4.67368	High	0	1.75e-12
ATRN	8455	21450861	NP_647537.1	416	Yes	Yes	7	NVT	GKIDSTG	VTNELRV	Yes	High	[K].IDSTGNVTNELR.[V]	1xTMT6plex [N-Term]; 2xDeamidated [N6(100); N9(100)]	0.0106101	0	1	4	4	21450861	21450861 [411-422]	0	1549.79	N6(Deamidated): 100; N9(Deamidated): 100	11.8	16.2	11	11.5	14.5	18.3	13	14.7667	1.1359	#N/A	Unique	1.90284	High	0	0.0007632
ATRN	8455	21450861	NP_647537.1	416	Yes	Yes	7	NVT	GKIDSTG	VTNELRV	Yes	High	[K].IDSTGNVTNELR.[V]	1xTMT6plex [N-Term]; 1xDeamidated [N6(100)]	4.93692e-08	0	1	4	5	21450861	21450861 [411-422]	0	1548.81	N6(Deamidated): 100	41.3	64.8	47.1	28.8	50	99.7	51.0667	59.5	1.16514	#N/A	Unique	4.04065	High	0	2.252e-11
ATRN	8455	21450861	NP_647537.1	1198	Yes	Yes	8	NAS	RDLDMFI	ASKNFNL	Yes	High	[R].DLDMFINASK.[N]	2xTMT6plex [N-Term; K10]; 1xOxidation [M4(100)]; 1xDeamidated [N7(100)]	0.0735783	0.00117085	1	4	1	21450861	21450861 [1192-1201]	0	1628.86	M4(Oxidation): 100; N7(Deamidated): 100	22.4	25.4	22	11.5	25.1	37.4	23.2667	24.6667	1.06017	#N/A	Unique	1.41651	High	0.0003202	0.01231
ATRN	8455	21450861	NP_647537.1	300	Yes	Yes	5	NSS	FPHRGIC	SSDVRGC	Yes	High	[R].GICNSSDVR.[G]	1xCarbamidomethyl [C3]; 1xTMT6plex [N-Term]; 1xDeamidated [N4(100)]	0.195019	0.00742786	1	4	1	21450861	21450861 [297-305]	0	1237.6	N4(Deamidated): 100	16.6	19.3	17.4	6.9	20.3	23.4	17.7667	16.8667	0.949343	#N/A	Unique	1.61818	High	0.002301	0.05209
B3GALT6	126792	116268097	NP_542172.2	131	Yes	Yes	6	NLT	ALRDAYE	LTAKVLA	No	High	[R].DAYENLTAK.[V]	2xTMT6plex [N-Term; K9]; 1xDeamidated [N5(100)]	0.00190742	0	1	1	3	116268097	116268097 [127-135]	0	1483.8	N5(Deamidated): 100	28.4	30.5	16.2	15.4	40.8	23.9	25.0333	26.7	1.06658	#N/A	Unique	2.29595	High	0	6.764e-05
B3GALT6	126792	116268097	NP_542172.2	131	Yes	Yes	6	NLT	ALRDAYE	LTAKVLA	No	High	[R].DAYENLTAK.[V]	1xTMT6plex [K9]; 1xDeamidated [N5(100)]	0.0763374	0.00173548	1	1	4	116268097	116268097 [127-135]	0	1254.64	N5(Deamidated): 100	12.8	18.9	11.6	13.5	15.6	16.5	14.4333	15.2	1.05312	#N/A	Unique	1.97682	High	0.0005939	0.01536
B4GAT1	11041	5802984	NP_006867.1	204	Yes	Yes	14	NVS	INYALGT	VSYPNNL	Yes	High	[R].VAQPGINYALGTNVSYPNNLLR.[N]	1xTMT6plex [N-Term]; 1xDeamidated [N13(100)]	1.84618e-06	0	1	1	1	5802984	5802984 [192-213]	0	2604.4	N13(Deamidated): 100	338.4	282.7	317.9	683.6	313.6	320	313	439.067	1.40277	#N/A	Unique	4.98756	High	0	3.756e-09
BCAM	4059	31543106	NP_005572.2	439	Yes	Yes	4	NFT	PVLSRTQ	FTLLVQG	Yes	High	[R].TQNFTLLVQGSPELK.[T]	1xTMT6plex [K15]; 1xDeamidated [N3(100)]	0.00349014	0	1	2	8	31543106	31543106 [437-451]	0	1905.05	N3(Deamidated): 100	19.6	6	35.5	29	16.2	14.3	20.3667	19.8333	0.973813	#N/A	Unique	2.80034	High	0	0.0001615
BSG	682	38372919	NP_001719.2	268	Yes	Yes	5	NGS	SEDKALM	GSESRFF	Yes	High	[K].ALMNGSESR.[F]	1xTMT6plex [N-Term]; 1xOxidation [M3(100)]; 1xDeamidated [N4(100)]	0.0253541	0	1	4	9	38372919	38372919 [265-273]	0	1210.59	M3(Oxidation): 100; N4(Deamidated): 100	324.1	92.2	388.7	158.8	281.1	389.9	268.333	276.6	1.03081	1.02	Unique	2.56803	High	0.00826	0.1337
BSG	682	38372919	NP_001719.2	160	Yes	Yes	9	NDS	ILLTCSL	DSATEVT	Yes	High	[K].ILLTCSLNDSATEVTGHR.[W]	1xCarbamidomethyl [C5]; 1xTMT6plex [N-Term]; 1xDeamidated [N8(100)]	4.9133e-08	0	1	2	4	38372919	38372919 [153-170]	0	2217.14	N8(Deamidated): 100	11	5.8	6.8	7.5	6.2	9.1	7.86667	7.6	0.966102	1.02	Unique	4.3331	High	0	4.952e-10
BSG	682	38372919	NP_001719.2	268	Yes	Yes	12	NGS	SEDKALM	GSESRFF	Yes	High	[K].ITDSEDKALMNGSESR.[F]	2xTMT6plex [N-Term; K7]; 1xOxidation [M10(100)]; 1xDeamidated [N11(100)]	0.000130031	0	1	4	22	38372919	38372919 [258-273]	1	2228.11	M10(Oxidation): 100; N11(Deamidated): 100	647	237.6	781	2143	504.5	520.7	555.2	1056.07	1.90214	1.02	Unique	3.32501	High	0	7.923e-06
BSG	682	38372919	NP_001719.2	268	Yes	Yes	12	NGS	SEDKALM	GSESRFF	Yes	High	[K].ITDSEDKALMNGSESR.[F]	1xTMT6plex [K7]; 1xOxidation [M10(100)]; 1xDeamidated [N11(100)]	1.02831e-06	0	1	4	14	38372919	38372919 [258-273]	1	1998.95	M10(Oxidation): 100; N11(Deamidated): 100	102.4	52	171.7	244.2	121.6	63.9	108.7	143.233	1.31769	1.02	Unique	4.08285	High	0	3.826e-08
BST2	684	4757876	NP_004326.1	65	Yes	Yes	2	NVT	RAVMECR	VTHLLQQ	Yes	High	[R].NVTHLLQQELTEAQK.[G]	1xTMT6plex [K15]; 1xDeamidated [N1(100)]	0.000423118	0	1	1	6	4757876	4757876 [65-79]	0	1982.08	N1(Deamidated): 100	11	9.3	6.2	15.8	25.7	7.4	8.83333	16.3	1.84528	1.77	Unique	3.07061	High	0	0.0001174
BTD	686	528524481	NP_001268652.1	351	Yes	Yes	11	NAT	VGLIGAE	ATGETDP	No	High	[K].NPVGLIGAENATGETDPSHSK.[F]	2xTMT6plex [N-Term; K21]; 1xDeamidated [N10(100)]	1.66128e-06	0	1	4	7	528524481	528524481 [342-362]	0	2553.32	N10(Deamidated): 100	17.7	17.2	10.8	18.9	11.5	10.4	15.2333	13.6	0.892779	#N/A	Unique	3.52019	High	0	3.226e-09
BTD	686	528524481	NP_001268652.1	351	Yes	Yes	11	NAT	VGLIGAE	ATGETDP	No	High	[K].NPVGLIGAENATGETDPSHSK.[F]	1xTMT6plex [K21]; 1xDeamidated [N10(100)]	3.02714e-09	0	1	4	4	528524481	528524481 [342-362]	0	2324.16	N10(Deamidated): 100	14.4	11.4	8.9	8.9	10.4	8.3	11.5667	9.2	0.795389	#N/A	Unique	4.33203	High	0	4.391e-13
BTD	686	528524481	NP_001268652.1	152	Yes	Yes	3	NDT	CLEPHRF	DTEVLQR	No	High	[R].FNDTEVLQR.[L]	1xTMT6plex [N-Term]; 1xDeamidated [N2(100)]	0.00893089	0	1	4	3	528524481	528524481 [151-159]	0	1351.71	N2(Deamidated): 100	49.2	22.7	21.8	15.8	20.5	13.6	31.2333	16.6333	0.532551	#N/A	Unique	2.80443	High	0	0.0005992
BTN2A1	11120	5921461	NP_008980.1	114	Yes	Yes	10	NIT	SVALVIH	ITAQENG	No	High	[R].GSVALVIHNITAQENGTYR.[C]	1xTMT6plex [N-Term]; 2xDeamidated [N9(100); N15(100)]	5.56429e-06	0	1	4	3	5921461	5921461 [106-124]	0	2274.19	N9(Deamidated): 100; N15(Deamidated): 100	9.4	4.5	6.5	8.1	6	10.1	6.8	8.06667	1.18627	#N/A	Unique	3.99237	High	0	1.78e-08
BTN3A3	10384	5901908	NP_008925.1	115	Yes	Yes	4	NVT	KAALRIH	VTASDSG	No	High	[R].IHNVTASDSGK.[Y]	2xTMT6plex [N-Term; K11]; 1xDeamidated [N3(100)]	1.66927e-06	0	1	18	8	5901908	5901908 [113-123]	0	1587.87	N3(Deamidated): 100	24.7	20.3	17.8	40.1	33.5	32	20.9333	35.2	1.68153	#N/A	Unique	3.5213	High	0	1.276e-07
BTN3A3	10384	5901908	NP_008925.1	115	Yes	Yes	4	NVT	KAALRIH	VTASDSG	No	High	[R].IHNVTASDSGK.[Y]	1xTMT6plex [K11]; 1xDeamidated [N3(100)]	0.000265715	0	1	18	9	5901908	5901908 [113-123]	0	1358.71	N3(Deamidated): 100	15.9	15.1	10.5	19.6	25.2	21.8	13.8333	22.2	1.60482	#N/A	Unique	2.73132	High	0	4.165e-06
C1QTNF3	114899	62739183	NP_852100.3	70	Yes	Yes	7	NNT	PKTGTVD	NTSTDLK	No	High	[K].TGTVDNNTSTDLK.[S]	1xTMT6plex [K13]; 1xDeamidated [N6(99.7)]	0.00286722	0	1	1	2	62739183	62739183 [65-77]	0	1595.8	N6(Deamidated): 99.74	15.3	17.3	15	7.7	13.1	23.6	15.8667	14.8	0.932773	#N/A	Unique	2.39608	High	0	0.0004888
C3	718	115298678	NP_000055.2	85	Yes	Yes	13	NVT	PATNHMG	VTFTIPA	Yes	High	[K].TVLTPATNHMGNVTFTIPANR.[E]	1xTMT6plex [N-Term]; 1xOxidation [M10(100)]; 2xDeamidated [N8(100); N12(100)]	0.0128454	0	1	1	2	115298678	115298678 [74-94]	0	2502.29	N8(Deamidated): 100; M10(Oxidation): 100; N12(Deamidated): 100	9.8	8.2	10.9	12	9.1	10.1	9.63333	10.4	1.07958	#N/A	Unique	1.9368	High	0	0.001
C3	718	115298678	NP_000055.2	85	Yes	Yes	13	NVT	PATNHMG	VTFTIPA	Yes	High	[K].TVLTPATNHMGNVTFTIPANR.[E]	1xTMT6plex [N-Term]; 1xOxidation [M10(100)]; 1xDeamidated [N12(100)]	5.78101e-05	0	1	1	4	115298678	115298678 [74-94]	0	2501.3	M10(Oxidation): 100; N12(Deamidated): 99.55	13.6	12.2	19.9	25.7	21.6	12.6	15.2333	19.9667	1.31072	#N/A	Unique	4.18349	High	0	4.859e-07
CACNA2D1	781	578814598	XP_006716181.1	324	Yes	Yes	6	NIT	VLKDAVN	ITAKGIT	Yes	High	[K].DAVNNITAK.[G]	2xTMT6plex [N-Term; K9]; 2xDeamidated [N4(100); N5(100)]	0.00127498	0	1	12	7	578814598	578814598 [320-328]	0	1405.79	N4(Deamidated): 100; N5(Deamidated): 100	81.9	37	52.1	35.5	46.9	73	57	51.8	0.908772	#N/A	Unique	2.62305	High	0	0.0001175
CACNA2D1	781	578814598	XP_006716181.1	324	Yes	No	6	NIT	VLKDAVN	ITAKGIT	Yes	High	[K].DAVNNITAK.[G]	2xTMT6plex [N-Term; K9]; 1xDeamidated [N]	0.0129687	0	1	12	7	578814598	578814598 [320-328]	0	1404.81	N4(Deamidated): 50; N5(Deamidated): 50	41.6	27.6	29.7	24.2	28.5	56.4	32.9667	36.3667	1.10313	#N/A	Unique	2.3337	High	0	0.002362
CACNA2D1	781	578814598	XP_006716181.1	324	Yes	Yes	6	NIT	VLKDAVN	ITAKGIT	Yes	High	[K].DAVNNITAK.[G]	1xTMT6plex [K9]; 2xDeamidated [N4(100); N5(100)]	0.12657	0.00315632	1	12	2	578814598	578814598 [320-328]	0	1176.63	N4(Deamidated): 100; N5(Deamidated): 100	12.8	7.1	10.8	12.4	7.4	17.4	10.2333	12.4	1.21173	#N/A	Unique	1.58054	High	0.001958	0.04569
CACNA2D1	781	578814598	XP_006716181.1	324	Yes	Yes	6	NIT	VLKDAVN	ITAKGIT	Yes	High	[K].DAVNNITAK.[G]	1xTMT6plex [K9]; 1xDeamidated [N]	0.0689803	0.00117085	1	12	4	578814598	578814598 [320-328]	0	1175.65	N5(Deamidated): 99.78	22.5	11.9	17.9	12.5	18.4	25.7	17.4333	18.8667	1.08222	#N/A	Unique	1.98311	High	0.001716	0.04157
CACNA2D1	781	578814598	XP_006716181.1	136	Yes	Yes	9	NDS	DDLDPEK	DSEPGSQ	Yes	High	[K].DDLDPEKNDSEPGSQR.[I]	2xTMT6plex [N-Term; K7]; 1xDeamidated [N8(100)]	0.00550388	0	1	13	4	578814598	578814598 [129-144]	1	2261.09	N8(Deamidated): 100	32	5.1	15.9	10	16.4	35.1	17.6667	20.5	1.16038	#N/A	Unique	2.14796	High	0	0.0003019
CACNA2D1	781	578814598	XP_006716181.1	136	Yes	Yes	9	NDS	DDLDPEK	DSEPGSQ	Yes	High	[K].DDLDPEKNDSEPGSQR.[I]	1xTMT6plex [K7]; 1xDeamidated [N8(100)]	1.76817e-06	0	1	13	2	578814598	578814598 [129-144]	1	2031.93	N8(Deamidated): 100	19.2	4	11.9	7.3	10.9	14.1	11.7	10.7667	0.920228	#N/A	Unique	3.00934	High	0	3.517e-09
CACNA2D1	781	578814598	XP_006716181.1	136	Yes	Yes	23	NDS	DDLDPEK	DSEPGSQ	Yes	High	[R].EDFASNEVVYYNAKDDLDPEKNDSEPGSQR.[I]	3xTMT6plex [N-Term; K14; K21]; 2xDeamidated [N12(100); N22(100)]	0.00188017	0	1	13	1	578814598	578814598 [115-144]	2	4120.97	N12(Deamidated): 100; N22(Deamidated): 100	15.5		11.7	3.2	6.1	12	13.6	7.1	0.522059	#N/A	Unique	2.43602	High	0	6.617e-05
CACNA2D1	781	578814598	XP_006716181.1	136	Yes	Yes	23	NDS	DDLDPEK	DSEPGSQ	Yes	High	[R].EDFASNEVVYYNAKDDLDPEKNDSEPGSQR.[I]	3xTMT6plex [N-Term; K14; K21]; 1xDeamidated [N22(100)]	0.000357733	0	1	13	3	578814598	578814598 [115-144]	2	4119.99	N22(Deamidated): 100	13.8		4.7	3.5	3.6	8.8	9.25	5.3	0.572973	#N/A	Unique	3.04345	High	0	6.341e-06
CADM1	23705	1034572786	XP_016872946.1	119	Yes	Yes	6	NVS	ELKVSLT	VSISDEG	No	High	[K].VSLTNVSISDEGR.[Y]	1xTMT6plex [N-Term]; 1xDeamidated [N5(100)]	3.54581e-08	0	1	8	4	1034572786	1034572786 [115-127]	0	1606.85	N5(Deamidated): 100	8.3	79	6.6	18.2	91	14	31.3	41.0667	1.31203	#N/A	Unique	4.67453	High	0	1.418e-11
CADM1	23705	1034572786	XP_016872946.1	310	Yes	Yes	23	NKT	NLFINNL	KTDNGTY	No	High	[R].VDDEMPQHAVLSGPNLFINNLNKTDNGTYR.[C]	1xTMT6plex [K23]; 1xOxidation [M5(100)]; 2xDeamidated [N26(99.1); N]	0.116697	0.00315632	1	11	1	1034572786	1034572786 [289-318]	1	3619.75	M5(Oxidation): 100; N19(Deamidated): 33.64; N20(Deamidated): 33.64; N22(Deamidated): 33.64; N26(Deamidated): 99.08	5.6	13.3	4.5	7.3	9.9	7.4	7.8	8.2	1.05128	#N/A	Unique	1.41026	High	0.00084	0.02414
CADM4	199731	21686977	NP_660339.1	262	Yes	Yes	3	NES	QIRWNRG	ESLPERA	No	High	[R].GNESLPER.[A]	1xTMT6plex [N-Term]; 1xDeamidated [N2(100)]	0.130031	0.00315632	1	3	1	21686977	21686977 [261-268]	0	1131.58	N2(Deamidated): 100	20.7	24.2	27.7	16.7	18.4	36.6	24.2	23.9	0.987603	#N/A	Unique	1.71407	High	0.00084	0.02838
CADM4	199731	21686977	NP_660339.1	67	Yes	Yes	7	NGT	ARQTLFF	GTRALKD	Yes	High	[R].QTLFFNGTR.[A]	1xTMT6plex [N-Term]; 1xDeamidated [N6(100)]	0.205306	0.00881471	1	3	1	21686977	21686977 [62-70]	0	1313.71	N6(Deamidated): 100	17.5	17	25.6	11.6	7.4	14.7	20.0333	11.2333	0.560732	#N/A	Unique	1.75707	High	0.00277	0.05637
CALU	813	314122177	NP_001186600.1	139	Yes	Yes	18	NAT	VSWEEYK	ATYGYVL	No	High	[K].GHDLNEDGLVSWEEYKNATYGYVLDDPDPDDGFNYK.[Q]	3xTMT6plex [N-Term; K16; K36]; 1xDeamidated [N17(100)]	2.96787e-05	0	1	3	2	314122177	314122177 [123-158]	1	4839.28	N17(Deamidated): 99.96	209.7	226.7	199.7	239	180.1	184.6	212.033	201.233	0.949065	0.9	Unique	4.14722	High	0.0005939	0.01448
CALU	813	314122177	NP_001186600.1	139	Yes	Yes	2	NAT	VSWEEYK	ATYGYVL	No	High	[K].NATYGYVLDDPDPDDGFNYK.[Q]	1xTMT6plex [K20]; 1xDeamidated [N1(100)]	0.000727483	0	1	3	12	314122177	314122177 [139-158]	0	2509.12	N1(Deamidated): 100	77.2	45.8	73.3	53.7	60.5	69.7	65.4333	61.3	0.936831	0.9	Unique	3.76312	High	0	1.729e-05
CALU	813	314122177	NP_001186600.1	139	Yes	Yes	2	NAT	VSWEEYK	ATYGYVL	No	High	[K].NATYGYVLDDPDPDDGFNYK.[Q]	1xTMT6plex [K20]; 2xDeamidated [N1(100); N18(100)]	0.010919	0	1	3	5	314122177	314122177 [139-158]	0	2510.11	N1(Deamidated): 100; N18(Deamidated): 100	26.3	10.8	21.7	20	20.7	20.1	19.6	20.2667	1.03401	0.9	Unique	1.94618	High	0	0.002157
CALU	813	314122179	NP_001186601.1	139	Yes	Yes	2	NVT	ISWDEYR	VTYGTYL	No	High	[R].NVTYGTYLDDPDPDDGFNYK.[Q]	1xTMT6plex [K20]; 2xDeamidated [N1(100); N18(100)]	0.0715725	0.00117085	1	2	1	314122179	314122179 [139-158]	0	2540.12	N1(Deamidated): 100; N18(Deamidated): 100	11.2	8.1	8.5	11.1	10.2	14.8	9.26667	12.0333	1.29856	#N/A	Unique	1.55756	High	0.0003202	0.01176
CALU	813	314122179	NP_001186601.1	139	Yes	Yes	2	NVT	ISWDEYR	VTYGTYL	No	High	[R].NVTYGTYLDDPDPDDGFNYK.[Q]	1xTMT6plex [K20]; 1xDeamidated [N1(100)]	0.00420782	0	1	2	6	314122179	314122179 [139-158]	0	2539.14	N1(Deamidated): 100	24.9	23.2	24.4	26.9	22.1	26.4	24.1667	25.1333	1.04	#N/A	Unique	2.54268	High	0	0.000207
CASC4	113201	29826289	NP_612432.2	115	Yes	Yes	5	NIS	DKVKLQN	ISYQMAD	No	High	[K].LQNNISYQMADIHHLK.[E]	2xTMT6plex [N-Term; K16]; 1xOxidation [M9(100)]; 1xDeamidated [N4(99.7)]	2.10114e-05	0	1	3	4	29826289	29826289 [112-127]	0	2400.27	N4(Deamidated): 99.7; M9(Oxidation): 100	14	6.7	4.8	4	5.4	7.2	8.5	5.53333	0.65098	#N/A	Unique	2.98397	High	0	1.158e-07
CASC4	113201	29826289	NP_612432.2	115	Yes	No	5	NIS	DKVKLQN	ISYQMAD	No	High	[K].LQNNISYQMADIHHLK.[E]	1xTMT6plex [K16]; 1xOxidation [M9(100)]; 1xDeamidated [N]	0.0203879	0	1	3	4	29826289	29826289 [112-127]	0	2171.11	N3(Deamidated): 50; N4(Deamidated): 50; M9(Oxidation): 100	8.4	6.2	6.8	8.7	5	6.3	7.13333	6.66667	0.934579	#N/A	Unique	1.55146	High	0	0.001935
CASC4	113201	29826289	NP_612432.2	150	Yes	Yes	3	NNT	QLQDYRK	NTYLVKR	No	High	[R].KNNTYLVK.[R]	2xTMT6plex [K1; K8]; 1xDeamidated [N]	0.119905	0.00315632	1	3	5	29826289	29826289 [149-156]	1	1438.87	N2(Deamidated): 100	22.2	15.7	13.4	10.6	16.7	15.1	17.1	14.1333	0.826511	#N/A	Unique	1.94001	High	0.00084	0.0251
CASC4	113201	29826289	NP_612432.2	150	Yes	Yes	12	NNT	QLQDYRK	NTYLVKR	No	High	[R].QEDQLQDYRKNNTYLVK.[R]	2xTMT6plex [K10; K17]; 1xDeamidated [N11(99.5)]	0.0218918	0	1	3	1	29826289	29826289 [140-156]	2	2614.39	N11(Deamidated): 99.5	15.6	13.1	8.2	12.9	9.2	14	12.3	12.0333	0.97832	#N/A	Unique	1.56116	High	0	0.002132
CASC4	113201	29826289	NP_612432.2	150	Yes	Yes	12	NNT	QLQDYRK	NTYLVKR	No	High	[R].QEDQLQDYRKNNTYLVK.[R]	3xTMT6plex [N-Term; K10; K17]; 1xDeamidated [N]	0.00334273	0	1	3	4	29826289	29826289 [140-156]	2	2843.55	N12(Deamidated): 99.61	19.6	17.9	9.7	25.3	11.3	11.9	15.7333	16.1667	1.02754	#N/A	Unique	1.4534	High	0	0.0001488
CD109	135228	115529484	NP_598000.2	247	Yes	Yes	4	NGT	SMNSKHL	GTITAKY	Yes	High	[K].HLNGTITAK.[Y]	2xTMT6plex [N-Term; K9]; 1xDeamidated [N3(100)]	0.00126281	0	1	5	8	115529484	115529484 [245-253]	0	1413.85	N3(Deamidated): 100	51.9	15.4	43.3	37	21.6	52.2	36.8667	36.9333	1.00181	0.85	Unique	2.45356	High	0	3.783e-05
CD109	135228	115529484	NP_598000.2	247	Yes	Yes	4	NGT	SMNSKHL	GTITAKY	Yes	High	[K].HLNGTITAK.[Y]	1xTMT6plex [K9]; 1xDeamidated [N3(100)]	0.00532222	0	1	5	5	115529484	115529484 [245-253]	0	1184.68	N3(Deamidated): 100	28.4	8.3	22.5	13.7	13.1	24.2	19.7333	17	0.861486	0.85	Unique	2.81082	High	0	0.0002876
CD109	135228	115529484	NP_598000.2	287	Yes	Yes	3	NGS	ITKTFKI	GSANFSF	No	High	[K].INGSANFSFNDEEMK.[N]	2xTMT6plex [N-Term; K15]; 1xOxidation [M14(100)]; 1xDeamidated [N2(100)]	0.130031	0.00315632	1	5	1	115529484	115529484 [286-300]	0	2178.04	N2(Deamidated): 100; M14(Oxidation): 100	21.5	6.5	13.4	14.9	11.5	22.7	13.8	16.3667	1.18599	0.85	Unique	1.53716	High	0.00084	0.02825
CD109	135228	115529484	NP_598000.2	287	Yes	Yes	3	NGS	ITKTFKI	GSANFSF	No	High	[K].INGSANFSFNDEEMK.[N]	2xTMT6plex [N-Term; K15]; 1xOxidation [M14(100)]; 2xDeamidated [N2(100); N6(100)]	0.000770577	0	1	5	5	115529484	115529484 [286-300]	0	2179.03	N2(Deamidated): 100; N6(Deamidated): 100; M14(Oxidation): 100	15.6	8.1	11.3	7.4	7.3	16	11.6667	10.2333	0.877143	0.85	Unique	2.19074	High	0	0.0003151
CD109	135228	115529484	NP_598000.2	419	Yes	Yes	3	NYT	MEAVQKI	YTVPQSG	Yes	High	[K].INYTVPQSGTFK.[I]	2xTMT6plex [N-Term; K12]; 1xDeamidated [N2(100)]	0.00073098	0	1	5	7	115529484	115529484 [418-429]	0	1814.01	N2(Deamidated): 100	47.6	8.5	29.6	14.6	20.3	54.6	28.5667	29.8333	1.04434	0.85	Unique	2.54096	High	0	1.741e-05
CD109	135228	115529484	NP_598000.2	419	Yes	Yes	3	NYT	MEAVQKI	YTVPQSG	Yes	High	[K].INYTVPQSGTFK.[I]	1xTMT6plex [K12]; 1xDeamidated [N2(100)]	0.00441449	0	1	5	5	115529484	115529484 [418-429]	0	1584.85	N2(Deamidated): 100	77.8	21.4	59.5	38.7	39.3	81.3	52.9	53.1	1.00378	0.85	Unique	2.92727	High	0	0.001041
CD109	135228	115529484	NP_598000.2	419	Yes	Yes	9	NYT	MEAVQKI	YTVPQSG	Yes	High	[K].MEAVQKINYTVPQSGTFK.[I]	2xTMT6plex [K6; K18]; 1xOxidation [M1(100)]; 1xDeamidated [N8(100)]	0.00420782	0	1	5	3	115529484	115529484 [412-429]	1	2516.35	M1(Oxidation): 100; N8(Deamidated): 100	17.2	11.9	18.2	16.3	13.8	12.5	15.7667	14.2	0.900634	0.85	Unique	2.1141	High	0	0.0002059
CD109	135228	115529484	NP_598000.2	1086	Yes	Yes	6	NYT	FSRGISD	YTLALIT	Yes	High	[R].GISDNYTLALITYALSSVGSPK.[A]	2xTMT6plex [N-Term; K22]; 1xDeamidated [N5(100)]	1.50187e-05	0	1	5	1	115529484	115529484 [1082-1103]	0	2729.5	N5(Deamidated): 100	20.5	16.1	19	20.4	16.2	21.1	18.5333	19.2333	1.03777	0.85	Unique	3.58746	High	0	7.224e-08
CD109	135228	115529484	NP_598000.2	118	Yes	Yes	10	NST	QDEILFS	STRLSFE	Yes	High	[R].TQDEILFSNSTR.[L]	1xTMT6plex [N-Term]; 1xDeamidated [N9(100)]	0.000359453	0	1	3	10	115529484	115529484 [110-121]	0	1640.83	N9(Deamidated): 100	39.4	12.6	30.9	36	22.5	45.3	27.6333	34.6	1.25211	0.85	Unique	2.61634	High	0	0.0003618
CD164	8763	21361274	NP_006007.2	146	Yes	Yes	10	NNT	VTTSGTT	NTVTPTS	No	High	[K].TVTTSGTTNNTVTPTSQPVR.[K]	1xTMT6plex [N-Term]; 1xDeamidated [N9(99.8)]	1.15394e-07	0	1	3	4	21361274	21361274 [138-157]	0	2292.19	N9(Deamidated): 99.81	7.2	5.4	6.5	6.4	8.8	6.8	6.36667	7.33333	1.15183	#N/A	Unique	4.34047	High	0	7.499e-11
CD164	8763	21361274	NP_006007.2	146	Yes	Yes	10	NNT	VTTSGTT	NTVTPTS	No	High	[K].TVTTSGTTNNTVTPTSQPVRK.[S]	1xTMT6plex [K21]; 1xDeamidated [N9(99.8)]	3.9393e-06	0	1	3	6	21361274	21361274 [138-158]	1	2420.28	N9(Deamidated): 99.76	9.3	8	7	5.4	9.5	12	8.1	8.96667	1.107	#N/A	Unique	3.42965	High	0	1.097e-08
CD276	80381	767985482	XP_011520398.1	91	Yes	Yes	19	NRT	DQGSAYA	RTALFPD	No	High	[K].QLVHSFAEGQDQGSAYANR.[T]	1xTMT6plex [N-Term]; 1xDeamidated [N18(100)]	3.83201e-14	0	1	2	12	767985482	767985482 [74-92]	0	2308.12	N18(Deamidated): 100	27.5	28.2	24	58.4	41.2	44.5	26.5667	48.0333	1.80803	1.36	Unique	6.50356	High	0	5.33e-20
CD276	80381	767985482	XP_011520398.1	131	Yes	Yes	10	NRT	ALRDAYE	LTAKVLA	No	High	[QR].DQGSAYANR.[T]	1xTMT6plex [N-Term]; 1xDeamidated [N8(100)]	0.0110768	0	1	1	6	767985482	767985482 [84-92]; [302-310]	0	1211.59	N8(Deamidated): 100	37.7	35.4	27.9	34.6	60.9	40.9	33.6667	45.4667	1.3505	1.36	Unique	2.53109	High	0	0.001148
CD276	80381	767985482	XP_011520398.1	104	Yes	Yes	13	NAS	PDLLAQG	ASLRLQR	Yes	High	[R].TALFPDLLAQGNASLR.[L]	1xTMT6plex [N-Term]; 1xDeamidated [N12(100)]	1.93717e-07	0	1	2	3	767985482	767985482 [93-108]; [311-326]	0	1917.06	N12(Deamidated): 100	100.2	117.2	104.4	141	145.5	120.3	107.267	135.6	1.26414	1.36	Unique	5.00219	High	0	1.552e-10
CD276	80381	767985482	XP_011520398.1	215	Yes	Yes	7	NGT	LRVVLGA	GTYSCLV	Yes	High	[R].VVLGANGTYSCLVR.[N]	1xCarbamidomethyl [C11]; 1xTMT6plex [N-Term]; 1xDeamidated [N6(100)]	0.00897376	0	1	2	4	767985482	767985482 [210-223]; [428-441]	0	1738.94	N6(Deamidated): 100	14.5	14.3	11.5	15.4	18.4	17.9	13.4333	17.2333	1.28288	1.36	Unique	2.40181	High	0	0.0006004
CD40	958	1034626062	XP_016883624.1	180	Yes	Yes	11	NKT	VVQQAGT	KTDVVCG	No	High	[K].DLVVQQAGTNK.[T]	2xTMT6plex [N-Term; K11]; 1xDeamidated [N10(100)]	5.9498e-05	0	1	5	5	1034626062	1034626062 [171-181]	0	1631.94	N10(Deamidated): 100	17.9	13	44.7	17.8	47.6	34.4	25.2	33.2667	1.32011	0.97	Unique	3.1267	High	0	5.064e-07
CD40	958	1034626062	XP_016883624.1	180	Yes	Yes	11	NKT	VVQQAGT	KTDVVCG	No	High	[K].DLVVQQAGTNK.[T]	1xTMT6plex [K11]; 1xDeamidated [N10(100)]	0.0316516	0	1	5	4	1034626062	1034626062 [171-181]	0	1402.77	N10(Deamidated): 100	12	9.1	15.2	11.2	18.9	15	12.1	15.0333	1.24242	0.97	Unique	2.2528	High	0	0.003619
CD44	960	530396004	XP_005253288.1	57	Yes	Yes	4	NST	ADLCKAF	STLPTMA	Yes	High	[K].AFNSTLPTMAQMEK.[A]	2xTMT6plex [N-Term; K14]; 2xOxidation [M9(100); M12(100)]; 1xDeamidated [N3(100)]	2.58284e-06	0	1	29	49	530396004	530396004 [55-68]	0	2060.04	N3(Deamidated): 100; M9(Oxidation): 100; M12(Oxidation): 100	385.8	291	1053	795.1	630.4	827.4	576.6	750.967	1.3024	1.16	Unique	4.74673	High	0	1.74e-07
CD44	960	530396004	XP_005253288.1	57	Yes	Yes	4	NST	ADLCKAF	STLPTMA	Yes	High	[K].AFNSTLPTMAQMEK.[A]	1xTMT6plex [K14]; 2xOxidation [M9(100); M12(100)]; 1xDeamidated [N3(100)]	0.00021828	0	1	29	11	530396004	530396004 [55-68]	0	1830.88	N3(Deamidated): 100; M9(Oxidation): 100; M12(Oxidation): 100	66.4	66.6	231.6	174.4	148.2	157	121.533	159.867	1.31541	1.16	Unique	3.09757	High	0	3.162e-06
CD47	961	4502673	NP_001768.1	73	Yes	Yes	13	NKS	YTFDGAL	KSTVPTD	Yes	High	[K].GRDIYTFDGALNK.[S]	2xTMT6plex [N-Term; K13]; 1xDeamidated [N12(100)]	7.74594e-05	0	1	4	5	4502673	4502673 [62-74]	1	1929.05	N12(Deamidated): 100	33.7	16.7	14.7	16.2	24.8	30.7	21.7	23.9	1.10138	1.22	Unique	2.87823	High	0	7.343e-07
CD47	961	4502673	NP_001768.1	73	Yes	Yes	13	NKS	YTFDGAL	KSTVPTD	Yes	High	[K].GRDIYTFDGALNKSTVPTDFSSAK.[I]	3xTMT6plex [N-Term; K13; K24]; 1xDeamidated [N12(100)]	8.61207e-08	0	1	4	3	4502673	4502673 [62-85]	2	3278.75	N12(Deamidated): 100	23.7	11.4	9.2	68.2	16.3	17	14.7667	33.8333	2.2912	1.22	Unique	3.90439	High	0	4.954e-11
CD47	961	4502673	NP_001768.1	111	Yes	Yes	13	NYT	DAVSHTG	YTCEVTE	Yes	High	[K].MDKSDAVSHTGNYTCEVTELTR.[E]	1xCarbamidomethyl [C15]; 1xTMT6plex [K3]; 1xOxidation [M1(100)]; 1xDeamidated [N12(100)]	0.000633026	0	1	4	2	4502673	4502673 [100-121]	1	2760.27	M1(Oxidation): 100; N12(Deamidated): 100	5.3	5.8	4.4	4.1	5		5.16667	4.55	0.880645	1.22	Unique	2.29142	High	0	1.426e-05
CD47	961	4502673	NP_001768.1	111	Yes	Yes	10	NYT	DAVSHTG	YTCEVTE	Yes	High	[K].SDAVSHTGNYTCEVTELTR.[E]	1xCarbamidomethyl [C12]; 1xTMT6plex [N-Term]; 1xDeamidated [N9(100)]	3.99756e-08	0	1	4	4	4502673	4502673 [103-121]	0	2370.11	N9(Deamidated): 100	12.6	11	9.8	6.5	12.3	15.8	11.1333	11.5333	1.03593	1.22	Unique	4.84672	High	0	1.671e-11
CD47	961	4502673	NP_001768.1	73	Yes	Yes	11	NKS	YTFDGAL	KSTVPTD	Yes	High	[R].DIYTFDGALNK.[S]	2xTMT6plex [N-Term; K11]; 1xDeamidated [N10(100)]	2.72318e-07	0	1	4	10	4502673	4502673 [64-74]	0	1715.93	N10(Deamidated): 100	366.3	147.2	141.1	110.9	257.7	408.6	218.2	259.067	1.18729	1.22	Unique	4.69483	High	0	1.157e-08
CD47	961	4502673	NP_001768.1	73	Yes	Yes	11	NKS	YTFDGAL	KSTVPTD	Yes	High	[R].DIYTFDGALNK.[S]	1xTMT6plex [K11]; 1xDeamidated [N10(100)]	0.00324792	0	1	4	4	4502673	4502673 [64-74]	0	1486.76	N10(Deamidated): 100	29.5	22.3	19.1	20.1	27.4	29.8	23.6333	25.7667	1.09027	1.22	Unique	2.76186	High	0	0.0007848
CD47	961	4502673	NP_001768.1	73	Yes	Yes	11	NKS	YTFDGAL	KSTVPTD	Yes	High	[R].DIYTFDGALNKSTVPTDFSSAK.[I]	3xTMT6plex [N-Term; K11; K22]; 1xDeamidated [N10(100)]	6.39366e-05	0	1	4	4	4502673	4502673 [64-85]	1	3065.63	N10(Deamidated): 100	11.2	7.7	5.1	34.5	6.8	10.2	8	17.1667	2.14583	1.22	Unique	3.35116	High	0	5.577e-07
CD59	966	187829070	NP_001120697.1	43	Yes	Yes	5	NCS	ADCKTAV	CSSDFDA	Yes	High	[K].TAVNCSSDFDACLITK.[A]	2xCarbamidomethyl [C5; C12]; 2xTMT6plex [N-Term; K16]; 1xDeamidated [N4(100)]	0.0512742	0.000598249	1	1	1	187829070	187829070 [40-55]	0	2261.12	N4(Deamidated): 100	9.6	6.9	9.9	5.9	9.4	8.8	8.8	8.03333	0.912879	0.8	Unique	0.964478	High	0.000164	0.007246
CD63	967	4502679	NP_001771.1	130	Yes	Yes	3	NHT	MENYPKN	HTASILD	Yes	High	[K].NNHTASILDR.[M]	1xTMT6plex [N-Term]; 1xDeamidated [N]	5.45766e-05	0	1	3	17	4502679	4502679 [129-138]	0	1370.72	N2(Deamidated): 100	130.1	138.1	86.5	68.9	149.9	109.4	118.233	109.4	0.925289	0.96	Unique	3.77316	High	0	4.464e-07
CD63	967	4502679	NP_001771.1	130	Yes	Yes	11	NHT	MENYPKN	HTASILD	Yes	High	[R].QQMENYPKNNHTASILDR.[M]	2xTMT6plex [N-Term; K8]; 1xOxidation [M3(100)]; 2xDeamidated [N9(100); N10(100)]	3.23789e-10	0	1	3	19	4502679	4502679 [121-138]	1	2635.32	M3(Oxidation): 100; N9(Deamidated): 100; N10(Deamidated): 100	181	157	108.1	308.7	171	95.9	148.7	191.867	1.29029	0.96	Unique	5.89114	High	0	4.036e-14
CD63	967	4502679	NP_001771.1	130	Yes	No	11	NHT	MENYPKN	HTASILD	Yes	High	[R].QQMENYPKNNHTASILDR.[M]	1xTMT6plex [K8]; 1xOxidation [M3(100)]; 2xDeamidated [N]	0.0649607	0.000598249	1	3	11	4502679	4502679 [121-138]	1	2406.16	M3(Oxidation): 100; N5(Deamidated): 66.67; N9(Deamidated): 66.67; N10(Deamidated): 66.67	12.4	12	8.8	16.5	14.5	16	11.0667	15.6667	1.41566	0.96	Unique	1.62686	High	0.0004721	0.01355
CD63	967	4502679	NP_001771.1	130	Yes	Yes	11	NHT	MENYPKN	HTASILD	Yes	High	[R].QQMENYPKNNHTASILDR.[M]	2xTMT6plex [N-Term; K8]; 1xOxidation [M3(100)]; 1xDeamidated [N10(99.4)]	1.00423e-08	0	1	3	40	4502679	4502679 [121-138]	1	2634.33	M3(Oxidation): 100; N10(Deamidated): 99.66	368.3	333.9	203.5	594.9	328.6	162.9	301.9	362.133	1.19951	0.96	Unique	6.2699	High	0	1.016e-11
CD63	967	4502679	NP_001771.1	130	Yes	Yes	11	NHT	MENYPKN	HTASILD	Yes	High	[R].QQMENYPKNNHTASILDR.[M]	1xTMT6plex [K8]; 1xOxidation [M3(100)]; 1xDeamidated [N]	4.41993e-06	0	1	3	42	4502679	4502679 [121-138]	1	2405.17	M3(Oxidation): 100; N10(Deamidated): 99.33	98.4	99.7	83.9	179.3	125.3	59.7	94	121.433	1.29184	0.96	Unique	4.44314	High	0	4.269e-06
CD70	970	4507605	NP_001243.1	170	Yes	Yes	8	NLT	RGDTLCT	LTGTLLP	No	High	[R].GDTLCTNLTGTLLPSR.[N]	1xCarbamidomethyl [C5]; 1xTMT6plex [N-Term]; 1xDeamidated [N7(100)]	0.0112368	0	1	1	1	4507605	4507605 [164-179]	0	1949.02	N7(Deamidated): 100	4.6	5.3	17	24.4	29.5	11.9	8.96667	21.9333	2.4461	#N/A	Unique	1.11851	High	0	0.000826
CD82	3732	578820516	XP_006718286.1	198	Yes	Yes	10	NRT	GFCEAPG	RTQSGNH	Yes	High	[R].KGFCEAPGNR.[T]	1xCarbamidomethyl [C4]; 1xTMT6plex [K1]; 1xDeamidated [N9(100)]	0.103713	0.00222925	1	3	4	578820516	578820516 [190-199]	1	1365.68	N9(Deamidated): 100	4.4	5.1	3	3.7	6.5	6.8	4.16667	5.66667	1.36	1.36	Unique	1.70201	High	0.001833	0.04485
CD83	9308	4757946	NP_004224.1	79	Yes	Yes	4	NGS	HYHQKGQ	GSFDAPN	No	High	[K].GQNGSFDAPNERPYSLK.[I]	2xTMT6plex [N-Term; K17]; 1xDeamidated [N3(100)]	0.180416	0.00650338	1	3	1	4757946	4757946 [77-93]	0	2339.2	N3(Deamidated): 100	14.5	14.8	12.2	17.5	46.4	23.4	13.8333	29.1	2.10361	#N/A	Unique	1.45217	High	0.002073	0.04617
CDC42EP3	10602	19923356	NP_006440.2	88	Yes	Yes	3	NST	HNEFFRA	STSDSVF	No	High	[R].ANSTSDSVFTETPSPVLK.[N]	2xTMT6plex [N-Term; K18]; 1xDeamidated [N2(100)]	0.00147226	0	1	1	1	19923356	19923356 [87-104]	0	2339.24	N2(Deamidated): 100	11.7	13.3	7.9	19.3	14.2	16	10.9667	16.5	1.50456	#N/A	Unique	2.71647	High	0	4.697e-05
CDCP1	64866	30410805	NP_073753.3	39	Yes	Yes	4	NIT	IALPRES	ITVLIKL	No	High	[R].ESNITVLIK.[L]	2xTMT6plex [N-Term; K9]; 1xDeamidated [N3(100)]	3.5784e-05	0	1	4	10	30410805	30410805 [37-45]	0	1475.91	N3(Deamidated): 100	67.1	27.5	60.6	33	74	150.8	51.7333	85.9333	1.66108	1.34	Unique	3.41602	High	0	2.455e-07
CDCP1	64866	30410805	NP_073753.3	180	Yes	Yes	8	NGT	RIGTFCS	GTVSRIK	No	High	[R].IGTFCSNGTVSR.[I]	1xCarbamidomethyl [C5]; 1xTMT6plex [N-Term]; 1xDeamidated [N7(100)]	0.220659	0.00971724	1	4	1	30410805	30410805 [174-185]	0	1528.76	N7(Deamidated): 100	49.7	54.1	40	15	41.3	106.8	47.9333	54.3667	1.13421	1.34	Unique	1.59318	High	0.003103	0.06267
CDCP1	64866	30410805	NP_073753.3	339	Yes	Yes	13	NES	VLVQHPQ	ESNKIYV	No	High	[R].LQFQVLVQHPQNESNK.[I]	1xTMT6plex [K16]; 1xDeamidated [N12(100)]	4.37705e-05	0	1	3	4	30410805	30410805 [328-343]	0	2139.14	N12(Deamidated): 100	16.6	10.4	16	11.3	18	20.2	14.3333	16.5	1.15116	1.34	Unique	3.55795	High	0	3.412e-06
CDCP1	64866	30410805	NP_073753.3	339	Yes	Yes	13	NES	VLVQHPQ	ESNKIYV	No	High	[R].LQFQVLVQHPQNESNK.[I]	2xTMT6plex [N-Term; K16]; 1xDeamidated [N12(100)]	6.39366e-05	0	1	3	7	30410805	30410805 [328-343]	0	2368.3	N12(Deamidated): 100	31.4	8.5	17.4	10.8	22.3	40	19.1	24.3667	1.27574	1.34	Unique	3.59699	High	0	8.896e-07
CDCP1	64866	30410805	NP_073753.3	339	Yes	Yes	13	NES	VLVQHPQ	ESNKIYV	No	High	[R].LQFQVLVQHPQNESNK.[I]	2xTMT6plex [N-Term; K16]; 2xDeamidated [N12(100); N15(100)]	0.056532	0.000598249	1	3	1	30410805	30410805 [328-343]	0	2369.29	N12(Deamidated): 100; N15(Deamidated): 100	22	11.4	22.1	12.4	24.4	31.8	18.5	22.8667	1.23604	1.34	Unique	1.95698	High	0.000164	0.00836
CDCP1	64866	30410805	NP_073753.3	386	Yes	Yes	6	NLT	ESRTCSS	LTLTSGS	No	High	[R].TCSSNLTLTSGSK.[H]	1xCarbamidomethyl [C2]; 2xTMT6plex [N-Term; K13]; 1xDeamidated [N5(100)]	0.00312569	0	1	3	6	30410805	30410805 [382-394]	0	1814.96	N5(Deamidated): 100	20.9	9.6	13.3	5.4	18.9	45.5	14.6	23.2667	1.59361	1.34	Unique	2.11162	High	0	0.0004571
CDCP1	64866	30410805	NP_073753.3	386	Yes	Yes	6	NLT	ESRTCSS	LTLTSGS	No	High	[R].TCSSNLTLTSGSK.[H]	1xCarbamidomethyl [C2]; 1xTMT6plex [K13]; 1xDeamidated [N5(100)]	0.000234563	0	1	3	6	30410805	30410805 [382-394]	0	1585.79	N5(Deamidated): 100	20.5	11.1	16.9	9.5	24.7	32.3	16.1667	22.1667	1.37113	1.34	Unique	2.64186	High	0	1.755e-05
CDH13	1012	333944015	NP_001207417.1	718	Yes	Yes	20	NIT	SGKPPMT	ITDLRVQ	No	High	[K].ANYNLPIMVTDSGKPPMTNITDLR.[V]	2xTMT6plex [N-Term; K14]; 2xOxidation [M8(100); M17(100)]; 1xDeamidated [N19(100)]	1.41807e-06	0	1	5	6	333944015	333944015 [700-723]	0	3152.64	M8(Oxidation): 100; M17(Oxidation): 100; N19(Deamidated): 100	16.7	5.8	6.7	10.1	32.9	6.9	9.73333	16.6333	1.7089	#N/A	Unique	3.32386	High	0	2.575e-09
CDH2	1000	14589889	NP_001783.2	325	Yes	No	19	NET	PNMFTIN	ETGDIIT	Yes	High	[R].IVSQAPSTPSPNMFTINNETGDIITVAAGLDREK.[V]	2xTMT6plex [N-Term; K34]; 1xOxidation [M13(100)]; 1xDeamidated [N]	5.35872e-11	0	1	4	7	14589889	14589889 [308-341]	1	4062.11	M13(Oxidation): 100; N17(Deamidated): 50; N18(Deamidated): 50	129	131	155	295.1	147.4	151	138.333	197.833	1.43012	1.59	Unique	7.77369	High	0	1.119e-12
CDH2	1000	14589889	NP_001783.2	402	Yes	Yes	8	NLT	RVDIIVA	LTVTDKD	Yes	High	[R].VDIIVANLTVTDKDQPHTPAWNAVYR.[I]	1xTMT6plex [K13]; 1xDeamidated [N22(100)]	0.0229546	0	1	4	2	14589889	14589889 [396-421]	1	3166.67	N22(Deamidated): 100	8.8	7.5	10.8	5.7	12.8	10.5	9.03333	9.66667	1.07011	1.59	Unique	1.67009	High	0	0.00229
CDH6	1004	1034643172	XP_016864399.1	399	Yes	Yes	7	NTT	IREDAQI	TTIGSVT	No	High	[R].EDAQINTTIGSVTAQDPDAAR.[N]	1xTMT6plex [N-Term]; 1xDeamidated [N6(100)]	3.36259e-06	0	1	2	3	1034643172	1034643172 [394-414]	0	2403.18	N6(Deamidated): 100	9.2	7.8	5.8	11.4	9	12.2	7.6	10.8667	1.42982	#N/A	Unique	3.40779	High	0	8.715e-09
CDH6	1004	1034643172	XP_016864399.1	437	Yes	Yes	9	NGS	IFNIDSG	GSIFTSK	No	High	[R].IFNIDSGNGSIFTSK.[L]	1xTMT6plex [K15]; 1xDeamidated [N8(100)]	0.00762501	0	1	2	3	1034643172	1034643172 [430-444]	0	1829.95	N8(Deamidated): 100	12	8.8	10	17	26.1	11.7	10.2667	18.2667	1.77922	#N/A	Unique	2.03305	High	0	0.0004778
CEACAM1	634	19923195	NP_001703.2	378	Yes	Yes	6	NTT	RMKLSQG	TTLSINP	Yes	High	[K].LSQGNTTLSINPVK.[R]	1xTMT6plex [K14]; 1xDeamidated [N5(100)]	0.0652616	0.000598249	1	3	1	19923195	19923195 [374-387]	0	1701.96	N5(Deamidated): 100	12.8	36.1	7.8	15.6	7.6	12.9	18.9	12.0333	0.636684	#N/A	Unique	1.47312	High	0.000164	0.01031
CEACAM1	634	19923195	NP_001703.2	378	Yes	Yes	6	NTT	RMKLSQG	TTLSINP	Yes	High	[K].LSQGNTTLSINPVKR.[E]	1xTMT6plex [K14]; 1xDeamidated [N5(100)]	3.5956e-05	0	1	3	5	19923195	19923195 [374-388]	1	1858.06	N5(Deamidated): 100	12.7	27.5	8.1	9.5	9.5	12.6	16.1	10.5333	0.654244	#N/A	Unique	2.70643	High	0	2.482e-07
CEACAM1	634	19923195	NP_001703.2	197	Yes	Yes	8	NRT	RLQLSNG	RTLTLLS	Yes	High	[R].LQLSNGNR.[T]	1xTMT6plex [N-Term]; 2xDeamidated [N5(100); N7(100)]	0.153372	0.00357109	1	18	1	19923195	19923195 [191-198]	0	1132.62	N5(Deamidated): 100; N7(Deamidated): 100	14	132.1	6.1	8.6	14.4	10	50.7333	11	0.21682	#N/A	Unique	2.20247	High	0.001331	0.03608
CELSR1	9620	578837544	XP_006724446.1	2122	Yes	Yes	5	NET	MNEKLSR	ETQVDGA	No	High	[K].LSRNETQVDGAR.[A]	1xTMT6plex [N-Term]; 1xDeamidated [N4(100)]	0.00723346	0	1	4	2	578837544	578837544 [2119-2130]	1	1575.83	N4(Deamidated): 100	7.2	21.9	6.4	10.3	10.1	9	11.8333	9.8	0.828169	#N/A	Unique	2.06064	High	0	0.0004431
CELSR1	9620	578837544	XP_006724446.1	1287	Yes	Yes	17	NRT	LQEQIYL	RTLLTTI	No	High	[R].GQFFPSEDLQEQIYLNR.[T]	1xTMT6plex [N-Term]; 1xDeamidated [N16(100)]	6.15297e-05	0	1	5	1	578837544	578837544 [1272-1288]	0	2314.16	N16(Deamidated): 100	8.4	9	14.4	12.8	11	13.6	10.6	12.4667	1.1761	#N/A	Unique	3.12079	High	0	5.306e-07
CELSR2	1952	13325064	NP_001399.1	2043	Yes	Yes	5	NES	FAERLQR	ESGLDSG	No	High	[R].LQRNESGLDSGR.[S]	1xTMT6plex [N-Term]; 1xDeamidated [N4(100)]	0.00561046	0	1	2	2	13325064	13325064 [2040-2051]	1	1561.81	N4(Deamidated): 100	12.4	39	14	20.2	15.3	16	21.8	17.1667	0.787462	#N/A	Unique	2.24931	High	0	0.0003104
CHPF2	54480	48717495	NP_061888.1	121	Yes	Yes	12	NRT	STLAVAV	RTVAHHF	No	High	[R].ATLSTLAVAVNR.[T]	1xTMT6plex [N-Term]; 1xDeamidated [N11(100)]	0.0896288	0.00222925	1	2	1	48717495	48717495 [111-122]	0	1445.85	N11(Deamidated): 100	20.8	13.8	11.5	10.3	14	11	15.3667	11.7667	0.765727	#N/A	Unique	1.78805	High	0.0005939	0.01634
CHST12	55501	345090974	NP_001230724.1	280	Yes	Yes	5	NHT	PMLRLYA	HTSLPAS	Yes	High	[R].LYANHTSLPASAR.[E]	1xTMT6plex [N-Term]; 1xDeamidated [N4(100)]	0.00823254	0	1	1	4	345090974	345090974 [277-289]	0	1630.88	N4(Deamidated): 100	7	4.8	4.4	6.5	4.8	5.5	5.4	5.6	1.03704	#N/A	Unique	1.68138	High	0	0.0005339
CHST7	56548	23238228	NP_063939.2	186	Yes	Yes	7	NLT	ARAPDTA	LTTAALF	No	High	[R].APDTANLTTAALFR.[W]	1xTMT6plex [N-Term]; 1xDeamidated [N6(100)]	0.188408	0.00695865	1	1	2	23238228	23238228 [181-194]	0	1691.92	N6(Deamidated): 100	13.5	9.5	23.4	33.2	16.8	20.5	15.4667	23.5	1.5194	#N/A	Unique	1.77462	High	0.002187	0.04944
CHST7	56548	23238228	NP_063939.2	88	Yes	Yes	5	NLS	QSPRFPS	LSGAVGE	No	High	[R].FPSNLSGAVGEAVSR.[E]	1xTMT6plex [N-Term]; 1xDeamidated [N4(100)]	0.199251	0.0078852	1	1	1	23238228	23238228 [85-99]	0	1720.91	N4(Deamidated): 100	14.2	11.8	15	21.3	16.2	23.1	13.6667	20.2	1.47805	#N/A	Unique	1.32559	High	0.002411	0.05368
CHSY1	22856	767983626	XP_011519666.1	189	Yes	Yes	4	NSS	ENFLRSL	SSEPLFL	No	High	[R].SLNSSEPLFLGQTGLGTTEEMGK.[L]	2xTMT6plex [N-Term; K23]; 1xOxidation [M21(100)]; 1xDeamidated [N3(100)]	1.50231e-07	0	1	2	2	767983626	767983626 [187-209]	0	2871.47	N3(Deamidated): 100; M21(Oxidation): 100	8	8.4	4.1	12.8	8.7	7.4	6.83333	9.63333	1.40976	#N/A	Unique	3.74475	High	0	1.089e-10
CLCN2	1181	156104869	NP_004357.3	403	Yes	Yes	10	NRT	TLVTLFD	RTWVRQG	No	High	[K].ETLVTLFDNR.[T]	1xTMT6plex [N-Term]; 1xDeamidated [N9(100)]	0.035769	0	1	7	1	156104869	156104869 [395-404]	0	1437.78	N9(Deamidated): 100	17.2	7	7.2	4.6	10.2	10.1	10.4667	8.3	0.792994	#N/A	Unique	1.53396	High	0	0.004299
CLDND1	56650	93588620	NP_001035272.1	65	Yes	Yes	7	NSS	YRSPVQE	SSDLNKS	No	High	[R].SPVQENSSDLNK.[S]	2xTMT6plex [N-Term; K12]; 1xDeamidated [N6(100)]	9.612e-05	0	1	2	6	93588620	93588620 [60-71]	0	1776.94	N6(Deamidated): 100	72.5	41.1	35.4	16.4	36	49.3	49.6667	33.9	0.68255	#N/A	Unique	3.04045	High	0	1.832e-06
CLDND1	56650	93588620	NP_001035272.1	65	Yes	Yes	7	NSS	YRSPVQE	SSDLNKS	No	High	[R].SPVQENSSDLNK.[S]	1xTMT6plex [K12]; 1xDeamidated [N6(99.1)]	0.000308311	0	1	2	3	93588620	93588620 [60-71]	0	1547.78	N6(Deamidated): 100	13.1	12.5	12.2	6.6	12.7	12.8	12.6	10.7	0.849206	#N/A	Unique	3.10379	High	0	5.155e-06
CLMP	79827	13376115	NP_079045.1	74	Yes	Yes	6	NLT	SSRHVYN	LTEEQKG	No	High	[R].HVYNNLTEEQK.[G]	2xTMT6plex [N-Term; K11]; 1xDeamidated [N5(99.8)]	0.000490942	0	1	2	11	13376115	13376115 [70-80]	0	1833.97	N5(Deamidated): 100	89.2	14.7	24.9	217.7	46.9	17.2	42.9333	93.9333	2.18789	#N/A	Unique	3.26154	High	0	1.053e-05
CLMP	79827	13376115	NP_079045.1	74	Yes	Yes	6	NLT	SSRHVYN	LTEEQKG	No	High	[R].HVYNNLTEEQK.[G]	1xTMT6plex [K11]; 1xDeamidated [N5(99.7)]	0.000556141	0	1	2	2	13376115	13376115 [70-80]	0	1604.81	N5(Deamidated): 99.84	55.3	9.9	12.1	30.9	35.4	14.1	25.7667	26.8	1.0401	#N/A	Unique	2.45931	High	0	1.185e-05
CLMP	79827	13376115	NP_079045.1	74	Yes	No	6	NLT	SSRHVYN	LTEEQKG	No	High	[R].HVYNNLTEEQKGR.[V]	2xTMT6plex [N-Term; K11]; 1xDeamidated [N]	0.0951128	0.00222925	1	2	4	13376115	13376115 [70-82]	1	2047.1	N4(Deamidated): 50; N5(Deamidated): 50	4.7	3.5		11.3		5.4	4.1	8.35	2.03659	#N/A	Unique	0.946447	High	0.0005939	0.01781
CLN5	1203	5729772	NP_006484.1	304	Yes	Yes	6	NYT	EFKNIET	YTRIFLY	No	High	[K].NIETNYTR.[I]	1xTMT6plex [N-Term]; 1xDeamidated [N5(100)]	0.0868034	0.00222925	1	1	1	5729772	5729772 [300-307]	0	1240.64	N5(Deamidated): 100	12.5	34.2	18.9	17.1	23.8	20.2	21.8667	20.3667	0.931402	#N/A	Unique	1.79393	High	0.0005939	0.01566
CLPTM1	1209	4502897	NP_001285.1	295	Yes	Yes	7	NES	QKDYYPI	ESLASLP	Yes	High	[K].DYYPINESLASLPLR.[V]	1xTMT6plex [N-Term]; 1xDeamidated [N6(100)]	3.84651e-07	0	1	3	3	4502897	4502897 [290-304]	0	1981.05	N6(Deamidated): 100	173.2	181	175.9	169.9	153.8	341.7	176.7	221.8	1.25523	1.11	Unique	4.38849	High	0	4.097e-10
CLPTM1L	81037	21359965	NP_110409.2	91	Yes	Yes	4	NVS	SKFERTV	VSVPKKT	Yes	High	[R].TVNVSVPK.[K]	2xTMT6plex [N-Term; K8]; 1xDeamidated [N3(100)]	0.00166775	0	1	2	5	21359965	21359965 [89-96]	0	1302.8	N3(Deamidated): 100	46.8	58	77.9	89.6	28.1	64.5	60.9	60.7333	0.997263	1	Unique	2.66181	High	0	0.0005648
CLPTM1L	81037	21359965	NP_110409.2	91	Yes	Yes	4	NVS	SKFERTV	VSVPKKT	Yes	High	[R].TVNVSVPKK.[T]	2xTMT6plex [K8; K9]; 1xDeamidated [N3(100)]	0.00901683	0	1	2	3	21359965	21359965 [89-97]	1	1430.9	N3(Deamidated): 100	13.4	9	9.1	11.4	5.1	8.5	10.5	8.33333	0.793651	1	Unique	1.89572	High	0	0.004671
CLU	1191	578815184	XP_006716347.1	138	Yes	Yes	6	NET	KKKEDAL	ETRESET	No	High	[K].EDALNETR.[E]	1xTMT6plex [N-Term]; 1xDeamidated [N5(100)]	0.0908666	0.00222925	1	2	1	578815184	578815184 [134-141]	0	1177.59	N5(Deamidated): 100	7.4	15.8	14	7.9	9.9	63.1	12.4	26.9667	2.17473	#N/A	Unique	1.53638	High	0.0005939	0.01668
CLU	1191	578815184	XP_006716347.1	138	Yes	Yes	6	NET	KKKEDAL	ETRESET	No	High	[K].EDALNETRESETK.[L]	2xTMT6plex [N-Term; K13]; 1xDeamidated [N5(100)]	0.00132484	0	1	2	3	578815184	578815184 [134-146]	1	1981.01	N5(Deamidated): 100	9.5	27	10.4	15.3	6.4	33.4	15.6333	18.3667	1.17484	#N/A	Unique	1.92668	High	0	0.005725
CLU	1191	578815184	XP_006716347.1	138	Yes	Yes	7	NET	KKKEDAL	ETRESET	No	High	[K].KEDALNETR.[E]	2xTMT6plex [K1; N-Term]; 1xDeamidated [N6(100)]	0.10138	0.00222925	1	2	5	578815184	578815184 [133-141]	1	1534.85	N6(Deamidated): 100	13.3	29.7	17.6	13.9	15.3	87.7	20.2	38.9667	1.92904	#N/A	Unique	1.54461	High	0.0005939	0.01962
CLU	1191	578815184	XP_006716347.1	426	Yes	Yes	4	NLT	NWVSRLA	LTQGEDQ	No	High	[R].LANLTQGEDQYYLR.[V]	1xTMT6plex [N-Term]; 1xDeamidated [N3(100)]	0.000331308	0	1	2	3	578815184	578815184 [424-437]	0	1913.98	N3(Deamidated): 100	14.1	41.9	29.6	55.8	15.4	112.3	28.5333	61.1667	2.14369	#N/A	Unique	2.48504	High	0	5.719e-06
CNN3	1266	4502923	NP_001830.1	240	Yes	Yes	9	NST	LTLQPVD	STISLQM	No	High	[K].LTLQPVDNSTISLQMGTNK.[V]	2xTMT6plex [N-Term; K19]; 1xOxidation [M15(100)]; 1xDeamidated [N8(100)]	1.04321e-06	0	1	3	4	4502923	4502923 [233-251]	0	2535.37	N8(Deamidated): 100; M15(Oxidation): 100	20.4	10.7	25.1	25.7	29.7	32.5	18.7333	29.3	1.56406	1.42	Unique	3.56956	High	0	2.779e-08
CNN3	1266	4502923	NP_001830.1	240	Yes	Yes	9	NST	LTLQPVD	STISLQM	No	High	[K].LTLQPVDNSTISLQMGTNK.[V]	1xTMT6plex [K19]; 1xOxidation [M15(100)]; 1xDeamidated [N8(100)]	0.0702649	0.00117085	1	3	4	4502923	4502923 [233-251]	0	2306.21	N8(Deamidated): 100; M15(Oxidation): 100	9.4	7.2	10	12	13.9	10.2	8.86667	12.0333	1.35714	1.42	Unique	1.87561	High	0.0003202	0.01146
CNNM4	26504	530368584	XP_005263971.1	122	Yes	Yes	10	NVS	LVVQQLV	VSRGNTS	No	High	[K].DLVVQQLVNVSR.[G]	1xTMT6plex [N-Term]; 1xDeamidated [N9(100)]	1.43862e-06	0	1	5	5	530368584	530368584 [114-125]	0	1599.93	N9(Deamidated): 100	52.6	44.6	47.3	32.8	36.3	54.2	48.1667	41.1	0.853287	#N/A	Unique	3.92192	High	0	2.637e-09
CNNM4	26504	530368584	XP_005263971.1	127	Yes	Yes	3	NTS	LVNVSRG	TSGVLVV	No	High	[R].GNTSGVLVVLTK.[F]	2xTMT6plex [N-Term; K12]; 1xDeamidated [N2(100)]	5.97841e-05	0	1	5	4	530368584	530368584 [126-137]	0	1647.01	N2(Deamidated): 100	36.8	39.2	50.6	31.8	28.4	30.8	42.2	30.3333	0.718799	#N/A	Unique	2.82468	High	0	5.08e-07
CNTN1	1272	767973235	XP_011536229.1	494	Yes	Yes	5	NST	ENNRGKA	STGTLVI	Yes	High	[R].GKANSTGTLVITDPTR.[I]	2xTMT6plex [N-Term; K2]; 1xDeamidated [N4(100)]	0.00635531	0	1	4	3	767973235	767973235 [491-506]	1	2090.19	N4(Deamidated): 100	34.5	16.7	7.5	8.1	10.2	12.7	19.5667	10.3333	0.528109	#N/A	Unique	1.95821	High	0	0.0003696
CNTNAP1	8506	1034601759	XP_016880727.1	518	Yes	Yes	8	NLT	KVDGQLV	LTLVEGR	No	High	[K].VDGQLVNLTLVEGR.[R]	1xTMT6plex [N-Term]; 1xDeamidated [N7(100)]	5.27745e-05	0	1	2	3	1034601759	1034601759 [512-525]	0	1742.98	N7(Deamidated): 100	32.5	13.2	28	15.9	22.2	29.2	24.5667	22.4333	0.913161	#N/A	Unique	3.06338	High	0	4.25e-07
CNTNAP1	8506	1034601759	XP_016880727.1	276	Yes	Yes	4	NFT	DRFGRDV	FTLDGYV	No	High	[R].DVNFTLDGYVQR.[F]	1xTMT6plex [N-Term]; 1xDeamidated [N3(100)]	0.00305164	0	1	2	4	1034601759	1034601759 [274-285]	0	1656.84	N3(Deamidated): 100	22.9	10.7	25.8	22.3	20.1	24.1	19.8	22.1667	1.11953	#N/A	Unique	2.51847	High	0	0.0001953
CNTNAP1	8506	1034601759	XP_016880727.1	120	Yes	Yes	4	NST	PFYQRGH	STFFGNV	No	High	[R].GHNSTFFGNVNESAVVR.[H]	1xTMT6plex [N-Term]; 2xDeamidated [N3(100); N11(99.7)]	7.24412e-06	0	1	2	3	1034601759	1034601759 [118-134]	0	2066.01	N3(Deamidated): 100; N11(Deamidated): 100	7.6	5.5	6.8	7.1	7.7	10.1	6.63333	8.3	1.25126	#N/A	Unique	2.56908	High	0	2.584e-08
CNTNAP1	8506	1034601759	XP_016880727.1	843	Yes	Yes	5	NTS	PYVRVEL	TSRDVVF	No	High	[R].VELNTSR.[D]	1xTMT6plex [N-Term]; 1xDeamidated [N4(100)]	0.105137	0.00274374	1	2	1	1034601759	1034601759 [840-846]	0	1048.58	N4(Deamidated): 100	87.3	9.4	97.3	32.3	70.4	76.9	64.6667	59.8667	0.925773	#N/A	Unique	2.4853	High	0.0007256	0.02071
CNTNAP1	8506	1034601759	XP_016880727.1	1147	Yes	Yes	27	NIT	DGQPHSI	ITRVYRN	No	High	[R].YQLGTSPYVYQLTTRPVTDGQPHSINITR.[V]	1xTMT6plex [N-Term]; 1xDeamidated [N26(100)]	6.30232e-05	0	1	2	2	1034601759	1034601759 [1122-1150]	0	3535.84	N26(Deamidated): 100	7.5	4.9	9.9	7.8	6.4	7.8	7.43333	7.33333	0.986547	#N/A	Unique	2.94766	High	0	5.467e-07
COL12A1	1303	767941884	XP_011533736.1	2679	Yes	Yes	5	NIT	KDIKEAG	ITTDGYE	Yes	High	[K].EAGNITTDGYEILGK.[L]	2xTMT6plex [N-Term; K15]; 1xDeamidated [N4(100)]	0.000230106	0	1	6	5	767941884	767941884 [2676-2690]	0	2040.09	N4(Deamidated): 100	9.5	9.9	4.2	10.6	7.4	5.2	7.86667	7.73333	0.983051	#N/A	Unique	2.99093	High	0	4.129e-06
COL12A1	1303	767941884	XP_011533736.1	2528	Yes	Yes	7	NLT	FKMLEAY	LTEKNFA	Yes	High	[K].MLEAYNLTEK.[N]	1xTMT6plex [K10]; 1xOxidation [M1(100)]; 1xDeamidated [N6(100)]	0.0013505	0	1	6	4	767941884	767941884 [2523-2532]	0	1457.74	M1(Oxidation): 100; N6(Deamidated): 100	12.7	16.7	10.8	18.4	13.5	11.4	13.4	14.4333	1.07711	#N/A	Unique	2.49974	High	0	4.158e-05
COL12A1	1303	767941884	XP_011533736.1	1763	Yes	Yes	7	NAT	PRNLQVY	ATSNSLT	Yes	High	[R].NLQVYNATSNSLTVK.[W]	1xTMT6plex [K15]; 2xDeamidated [N6(100); N10(100)]	0.0306248	0	1	6	1	767941884	767941884 [1758-1772]	0	1883	N6(Deamidated): 100; N10(Deamidated): 100	5.8	7.8	6.3	13.9	6.8	7	6.63333	9.23333	1.39196	#N/A	Unique	1.7698	High	0	0.003441
COL12A1	1303	767941884	XP_011533736.1	1763	Yes	Yes	7	NAT	PRNLQVY	ATSNSLT	Yes	High	[R].NLQVYNATSNSLTVK.[W]	1xTMT6plex [K15]; 1xDeamidated [N]	0.0263316	0	1	6	1	767941884	767941884 [1758-1772]	0	1882.01	N6(Deamidated): 100	6.8	8.7	4.4	12.7	6.8	8.6	6.63333	9.36667	1.41206	#N/A	Unique	1.68088	High	0	0.002776
COL7A1	1294	767922263	XP_011531639.1	786	Yes	Yes	6	NAS	VSRLQIL	ASSDVLR	No	High	[R].LQILNASSDVLR.[I]	1xTMT6plex [N-Term]; 1xDeamidated [N5(100)]	4.31582e-07	0	1	6	4	767922263	767922263 [782-793]	0	1558.9	N5(Deamidated): 100	31.8	14.8	54.4	27	101.5	32.8	33.6667	53.7667	1.59703	#N/A	Unique	4.27962	High	0	1.203e-08
COLGALT1	79709	31377697	NP_078932.2	381	Yes	Yes	4	NTS	AVDGKAM	TSQVEAL	Yes	High	[K].AMNTSQVEALGIQMLPGYR.[D]	1xTMT6plex [N-Term]; 2xOxidation [M2(100); M14(100)]; 1xDeamidated [N3(100)]	9.08531e-13	0	1	4	7	31377697	31377697 [379-397]	0	2341.17	M2(Oxidation): 100; N3(Deamidated): 100; M14(Oxidation): 100	27.8	19.6	19.3	20.2	24.4	28.6	22.2333	24.4	1.09745	1.31	Unique	6.20586	High	0	4.656e-18
COLGALT1	79709	31377697	NP_078932.2	381	Yes	Yes	4	NTS	AVDGKAM	TSQVEAL	Yes	High	[K].AMNTSQVEALGIQMLPGYRDPYHGRPLTK.[G]	2xTMT6plex [N-Term; K29]; 2xOxidation [M2(100); M14(100)]; 1xDeamidated [N3(100)]	0.0069948	0	1	4	2	31377697	31377697 [379-407]	1	3734.94	M2(Oxidation): 100; N3(Deamidated): 100; M14(Oxidation): 100				4.2			#DIV/0!	4.2	#DIV/0!	1.31	Unique	1.88601	High	0	0.0004239
COLGALT1	79709	31377697	NP_078932.2	96	Yes	Yes	14	NTS	ATDHNMD	TSTVLRE	Yes	High	[R].TALWVATDHNMDNTSTVLR.[E]	1xTMT6plex [N-Term]; 1xOxidation [M11(100)]; 1xDeamidated [N13(100)]	0.000165272	0	1	1	2	31377697	31377697 [84-102]	0	2391.18	M11(Oxidation): 100; N13(Deamidated): 99.49	20.2	15.2	14.4	15.6	11.8	24.3	16.6	17.2333	1.03815	1.31	Unique	2.04187	High	0	2.136e-06
COLGALT2	23127	767908779	XP_011507634.1	415	Yes	Yes	4	NTS	AVDGKAL	TSQLKAL	No	High	[K].ALNTSQLK.[A]	2xTMT6plex [N-Term; K8]; 1xDeamidated [N3(100)]	0.00133761	0	1	7	2	767908779	767908779 [413-420]	0	1333.81	N3(Deamidated): 100	58.7	13.1	22.1	103.3	12	56.7	31.3	57.3333	1.83174	#N/A	Unique	2.58975	High	0	0.0007759
CP	1356	767925751	XP_011510737.1	138	Yes	Yes	11	NTT	EGAIYPD	TTDFQRA	Yes	High	[K].EHEGAIYPDNTTDFQR.[A]	1xTMT6plex [N-Term]; 1xDeamidated [N10(100)]	9.42935e-05	0	1	7	4	767925751	767925751 [129-144]	0	2122.99	N10(Deamidated): 100	8.9	12	8.7	13.3	9	12.7	9.86667	11.6667	1.18243	#N/A	Unique	2.63003	High	0	1.532e-05
CPA4	51200	61743916	NP_057436.2	260	Yes	Yes	4	NAS	ADPNRNW	ASFAGKG	No	High	[R].NWNASFAGK.[G]	1xTMT6plex [K9]; 1xDeamidated [N3(100)]	0.00737347	0	1	2	4	61743916	61743916 [258-266]	0	1224.62	N3(Deamidated): 100	4.2	5.7	4.6	24.1	7.4	6.5	4.83333	12.6667	2.62069	2.36	Unique	2.1648	High	0	0.001829
CPD	1362	22202611	NP_001295.2	1070	Yes	No	10	NAS	LDTDFTN	ASQPETK	Yes	High	[K].DLDTDFTNNASQPETK.[A]	2xTMT6plex [N-Term; K16]; 1xDeamidated [N]	0.00452161	0	1	2	8	22202611	22202611 [1062-1077]	0	2255.11	N8(Deamidated): 50; N9(Deamidated): 50	10.5	17.5	11	10.9	10.9	12	13	11.2667	0.866667	1	Unique	2.22412	High	0	0.0002287
CPD	1362	22202611	NP_001295.2	399	Yes	Yes	11	NAT	ITGSGLE	ATISVAG	Yes	High	[K].DSITGSGLENATISVAGINHNITTGR.[F]	1xTMT6plex [N-Term]; 2xDeamidated [N]	1.32116e-14	0	1	2	5	22202611	22202611 [390-415]	0	2829.44	N10(Deamidated): 100; N21(Deamidated): 100	9.9	11.7	7.7	12.4	10.6	9.9	9.76667	10.9667	1.12287	1	Unique	6.89645	High	0	1.19e-20
CPD	1362	22202611	NP_001295.2	399	Yes	Yes	11	NAT	ITGSGLE	ATISVAG	Yes	High	[K].DSITGSGLENATISVAGINHNITTGR.[F]	1xTMT6plex [N-Term]; 3xDeamidated [N10(100); N19(100); N21(100)]	0.00354071	0	1	2	1	22202611	22202611 [390-415]	0	2830.43	N10(Deamidated): 100; N19(Deamidated): 100; N21(Deamidated): 100	9.9	6.2	4.1	9.3	7.1	7.6	6.73333	8	1.18812	1	Unique	2.20687	High	0	0.0001615
CPD	1362	22202611	NP_001295.2	867	Yes	Yes	9	NFT	SEGAIQV	FTLVRSS	Yes	High	[K].SEGAIQVNFTLVR.[S]	1xTMT6plex [N-Term]; 1xDeamidated [N8(100)]	0.0007001	0	1	2	3	22202611	22202611 [860-872]	0	1663.92	N8(Deamidated): 100	11.5	36.3	9.5	18.4	20.1	18.2	19.1	18.9	0.989529	1	Unique	2.5114	High	0	1.639e-05
CPD	1362	22202611	NP_001295.2	522	Yes	Yes	8	NIT	RFANEYP	ITRLYSL	Yes	High	[R].FANEYPNITR.[L]	1xTMT6plex [N-Term]; 1xDeamidated [N7(100)]	0.0763374	0.00173548	1	2	3	22202611	22202611 [516-525]	0	1454.75	N7(Deamidated): 100	23.6	51.2	23.7	18	32.7	32.5	32.8333	27.7333	0.84467	1	Unique	2.14708	High	0.0005939	0.02006
CPD	1362	22202611	NP_001295.2	811	Yes	Yes	5	NAT	TDGRGIL	ATISVAE	Yes	High	[R].GILNATISVAEINHPVTTYK.[T]	2xTMT6plex [N-Term; K20]; 1xDeamidated [N4(100)]	1.07383e-07	0	1	2	3	22202611	22202611 [808-827]	0	2600.47	N4(Deamidated): 100	87.9	165.1	116.3	113.1	119.3	102.1	123.1	111.5	0.905768	1	Unique	4.57068	High	0	6.744e-11
CPD	1362	22202611	NP_001295.2	1070	Yes	Yes	12	NAS	LDTDFTN	ASQPETK	Yes	High	[R].GKDLDTDFTNNASQPETK.[A]	3xTMT6plex [N-Term; K2; K18]; 1xDeamidated [N10(99.8)]	3.19023e-07	0	1	2	9	22202611	22202611 [1060-1077]	1	2669.39	N10(Deamidated): 99.75	14.5	69.8	16.8	25.4	36.3	27.4	33.7	29.7	0.881306	1	Unique	4.4122	High	0	3.137e-10
CPD	1362	22202611	NP_001295.2	1070	Yes	No	12	NAS	LDTDFTN	ASQPETK	Yes	High	[R].GKDLDTDFTNNASQPETK.[A]	2xTMT6plex [K2; K18]; 1xDeamidated [N]	0.0443718	0	1	2	2	22202611	22202611 [1060-1077]	1	2440.22	N10(Deamidated): 50; N11(Deamidated): 50	8.7	17.4	6.9	9.8	10.6	9.6	11	10	0.909091	1	Unique	1.62905	High	0	0.005889
CPD	1362	22202611	NP_001295.2	1070	Yes	Yes	12	NAS	LDTDFTN	ASQPETK	Yes	High	[R].GKDLDTDFTNNASQPETK.[A]	3xTMT6plex [N-Term; K2; K18]; 2xDeamidated [N10(100); N11(100)]	2.10176e-07	0	1	2	9	22202611	22202611 [1060-1077]	1	2670.37	N10(Deamidated): 100; N11(Deamidated): 100	26.9	88.9	25.7	41	55	34.6	47.1667	43.5333	0.922968	1	Unique	3.08868	High	0	1.742e-10
CPD	1362	22202611	NP_001295.2	955	Yes	No	12	NLT	MNYPHIT	LTNLGQS	Yes	High	[R].GLVMNYPHITNLTNLGQSTEYR.[H]	1xTMT6plex [N-Term]; 1xOxidation [M4(100)]; 1xDeamidated [N]	0.000273473	0	1	2	3	22202611	22202611 [945-966]	0	2767.39	M4(Oxidation): 100; N11(Deamidated): 50; N14(Deamidated): 50	9.9	11.9	7.5	17.8	12.9	13.1	9.76667	14.6	1.49488	1	Unique	3.43359	High	0	4.36e-06
CPD	1362	22202611	NP_001295.2	978	Yes	Yes	13	NVS	LEISNKP	VSEPEEP	Yes	High	[R].HIWSLEISNKPNVSEPEEPK.[I]	3xTMT6plex [N-Term; K10; K20]; 1xDeamidated [N12(99.7)]	0.0123638	0	1	2	1	22202611	22202611 [967-986]	0	3021.65	N12(Deamidated): 99.68	6.7	8	8.2	7	8.8	4.6	7.63333	6.8	0.89083	1	Unique	1.34697	High	0	0.0009459
CPD	1362	22202611	NP_001295.2	626	Yes	Yes	2	NNS	SISVIGR	NSNNFDL	Yes	High	[R].NNSNNFDLNR.[N]	1xTMT6plex [N-Term]; 1xDeamidated [N1(100)]	0.00654077	0	1	2	1	22202611	22202611 [626-635]	0	1437.69	N1(Deamidated): 100	30.1	103.8	18.8	32	55.8	44.6	50.9	44.1333	0.86706	1	Unique	2.74325	High	0	0.0003854
CPD	1362	22202611	NP_001295.2	522	Yes	Yes	9	NIT	RFANEYP	ITRLYSL	Yes	High	[R].RFANEYPNITR.[L]	1xTMT6plex [N-Term]; 1xDeamidated [N]	0.00339116	0	1	2	3	22202611	22202611 [515-525]	1	1610.85	N8(Deamidated): 100	5.8	10.3	4.1	4.9	5.3	6.3	6.73333	5.5	0.816832	1	Unique	2.47658	High	0	0.0001527
CPM	1368	53832021	NP_001005502.1	38	Yes	Yes	6	NYS	FLKTVAQ	YSSVTHL	No	High	[K].TVAQNYSSVTHLHSIGK.[S]	2xTMT6plex [N-Term; K17]; 1xDeamidated [N5(100)]	0.00433063	0	1	1	3	53832021	53832021 [34-50]	0	2301.26	N5(Deamidated): 100	6.1	4.2	3.7	6.1	3.4		4.66667	4.75	1.01786	#N/A	Unique	1.85046	High	0	0.0002151
CPM	1368	53832021	NP_001005502.1	38	Yes	Yes	6	NYS	FLKTVAQ	YSSVTHL	No	High	[K].TVAQNYSSVTHLHSIGK.[S]	1xTMT6plex [K17]; 1xDeamidated [N5(100)]	0.00309586	0	1	1	1	53832021	53832021 [34-50]	0	2072.1	N5(Deamidated): 100	15.9	10.2	12.1	17.9	11.1	13.3	12.7333	14.1	1.10733	#N/A	Unique	1.84703	High	0	0.0001341
CPM	1368	53832021	NP_001005502.1	384	Yes	Yes	10	NFS	IIPEKSQ	FSALKKD	No	High	[K].VIIPEKSQNFSALK.[K]	3xTMT6plex [N-Term; K6; K14]; 1xDeamidated [N9(100)]	0.0176787	0	1	1	2	53832021	53832021 [376-389]	1	2262.37	N9(Deamidated): 100	10.8	4.6	7.9	56.2	7.7	6.1	7.76667	23.3333	3.00429	#N/A	Unique	1.36867	High	0	0.001572
CPM	1368	53832021	NP_001005502.1	384	Yes	Yes	10	NFS	IIPEKSQ	FSALKKD	No	High	[K].VIIPEKSQNFSALKK.[D]	4xTMT6plex [N-Term; K6; K14; K15]; 1xDeamidated [N9(100)]	0.0664791	0.00117085	1	1	3	53832021	53832021 [376-390]	2	2619.63	N9(Deamidated): 100	7.9		3.4	73.4	4.2	3.4	5.65	27	4.77876	#N/A	Unique	1.3446	High	0.0003202	0.01118
CPM	1368	53832021	NP_001005502.1	164	Yes	No	11	NVS	PDAFEYN	VSRQPET	No	High	[R].NFPDAFEYNNVSR.[Q]	1xTMT6plex [N-Term]; 1xDeamidated [N]	0.0938193	0.00222925	1	1	4	53832021	53832021 [155-167]	0	1802.85	N9(Deamidated): 50; N10(Deamidated): 50	15.5	4.5	7.5	27.7	8.6	10.9	9.16667	15.7333	1.71636	#N/A	Unique	1.75643	High	0.002411	0.05364
CPQ	10404	1034658855	XP_016868442.1	179	Yes	Yes	11	NYS	VYNQPYI	YSRTVQY	Yes	High	[K].IVVYNQPYINYSR.[T]	1xTMT6plex [N-Term]; 1xDeamidated [N10(100)]	0.00303705	0	1	4	3	1034658855	1034658855 [170-182]	0	1858.99	N10(Deamidated): 99.83	7.3	7.8	15.9	14.1	8	18.3	10.3333	13.4667	1.30323	#N/A	Unique	1.97586	High	0	0.0001306
CPVL	54504	767945597	XP_011513739.1	81	Yes	Yes	10	NKT	YAGFLTV	KTYNSNL	Yes	High	[K].SYAGFLTVNK.[T]	2xTMT6plex [N-Term; K10]; 1xDeamidated [N9(100)]	0.000242572	0	1	2	2	767945597	767945597 [73-82]	0	1558.89	N9(Deamidated): 100	8.9	9.6	6.9	13.6	6.7	112.4	8.46667	44.2333	5.22441	#N/A	Unique	2.9984	High	0	3.681e-06
CPVL	54504	767945597	XP_011513739.1	346	Yes	Yes	8	NQT	RQAIHVG	QTFNDGT	Yes	High	[R].QAIHVGNQTFNDGTIVEK.[Y]	2xTMT6plex [N-Term; K18]; 1xDeamidated [N7(100)]	5.2783e-06	0	1	1	4	767945597	767945597 [340-357]	0	2430.3	N7(Deamidated): 100	6.8	5.5	4.8	7.2	5.1	43.8	5.7	18.7	3.2807	#N/A	Unique	3.4062	High	0	1.656e-08
CPVL	54504	767945597	XP_011513739.1	346	Yes	Yes	8	NQT	RQAIHVG	QTFNDGT	Yes	High	[R].QAIHVGNQTFNDGTIVEK.[Y]	2xTMT6plex [N-Term; K18]; 2xDeamidated [N7(100); N11(100)]	9.11801e-05	0	1	1	2	767945597	767945597 [340-357]	0	2431.29	N7(Deamidated): 100; N11(Deamidated): 100	8.2	12.1	6.7	11.8	8.2	33.3	9	17.7667	1.97407	#N/A	Unique	2.95377	High	0	9.2e-07
CREG1	8804	4503037	NP_003842.1	160	Yes	Yes	3	NET	SGTVTKV	ETEMDIA	Yes	High	[K].VNETEMDIAK.[H]	2xTMT6plex [N-Term; K10]; 1xOxidation [M6(100)]; 1xDeamidated [N2(100)]	0.00309586	0	1	1	6	4503037	4503037 [159-168]	0	1624.85	N2(Deamidated): 100; M6(Oxidation): 100	25	203.7	33.8	25.6	33.2	15.2	87.5	24.6667	0.281905	#N/A	Unique	2.57941	High	0.0007256	0.02158
CREG1	8804	4503037	NP_003842.1	160	Yes	Yes	3	NET	SGTVTKV	ETEMDIA	Yes	High	[K].VNETEMDIAK.[H]	1xTMT6plex [K10]; 1xOxidation [M6(100)]; 1xDeamidated [N2(100)]	0.126002	0.00315632	1	1	3	4503037	4503037 [159-168]	0	1395.69	N2(Deamidated): 100; M6(Oxidation): 100	14.1	42.8	15.7	14.4	15.3	15.7	24.2	15.1333	0.625344	#N/A	Unique	2.07411	High	0.00084	0.02708
CSF1	1435	27262661	NP_000748.3	154	Yes	Yes	5	NET	EKVKNVF	ETKNLLD	No	High	[K].NVFNETK.[N]	2xTMT6plex [N-Term; K7]; 1xDeamidated [N4(100)]	0.0766892	0.00173548	1	4	2	27262661	27262661 [151-157]	0	1310.74	N4(Deamidated): 100	110.9	24.8	8.7	31.1	22.4	18.2	48.1333	23.9	0.496537	#N/A	Unique	2.01654	High	0.0004721	0.01307
CSPG4	1464	47419930	NP_001888.2	2075	Yes	Yes	14	NRT	LDAGELA	RTGSVPR	Yes	High	[R].LDPTVLDAGELANR.[T]	1xTMT6plex [N-Term]; 1xDeamidated [N13(100)]	0.00682914	0	1	1	2	47419930	47419930 [2063-2076]	0	1713.92	N13(Deamidated): 100	16	11	13.1	40.2	43.1	17.4	13.3667	33.5667	2.51122	#N/A	Unique	2.44177	High	0	0.0004087
CSPG4	1464	47419930	NP_001888.2	2075	Yes	Yes	14	NRT	LDAGELA	RTGSVPR	Yes	High	[R].LDPTVLDAGELANRTGSVPR.[F]	1xTMT6plex [N-Term]; 1xDeamidated [N13(100)]	0.0385583	0	1	1	2	47419930	47419930 [2063-2082]	1	2311.25	N13(Deamidated): 100	10.2	8.3	9.3	26.1	8.5	11.1	9.26667	15.2333	1.64388	#N/A	Unique	1.32218	High	0	0.005287
CTBS	1486	4758092	NP_004379.1	299	Yes	Yes	4	NSS	KTIMKQI	SSISGNL	Yes	High	[K].QINSSISGNLWDKDQR.[A]	2xTMT6plex [N-Term; K13]; 1xDeamidated [N3(99.5)]	0.0233937	0	1	1	1	4758092	4758092 [297-312]	1	2320.23	N3(Deamidated): 100	15.8	12.5	16.7	16.3	17.6	18.1	15	17.3333	1.15556	#N/A	Unique	1.85502	High	0	0.002354
CTBS	1486	4758092	NP_004379.1	299	Yes	No	4	NSS	KTIMKQI	SSISGNL	Yes	High	[K].QINSSISGNLWDKDQR.[A]	1xTMT6plex [K13]; 1xDeamidated [N9(99.3)]	0.166774	0.00456631	1	1	1	4758092	4758092 [297-312]	1	2091.07	N3(Deamidated): 50; N9(Deamidated): 50	6.5	12.3	9.7	4.6	8.3	5.6	9.5	6.16667	0.649123	#N/A	Unique	1.1592	High	0.001589	0.04096
CTSB	1508	22538431	NP_680090.1	38	Yes	Yes	2	NTT	VNYVNKR	TTWQAGH	No	High	[R].NTTWQAGHNFYNVDMSYLK.[R]	1xTMT6plex [K19]; 1xOxidation [M15(100)]; 1xDeamidated [N9(99.6)]	0.0132187	0	1	1	12	22538431	22538431 [38-56]	0	2535.18	N9(Deamidated): 99.53; M15(Oxidation): 100	20.4	12.3	13.6	19.7	23.5	52.2	15.4333	31.8	2.06048	1.28	Unique	2.31179	High	0.001331	0.03538
CTSC	1075	189083844	NP_001805.3	119	Yes	Yes	7	NET	SKVTTYC	ETMTGWV	Yes	High	[K].VTTYCNETMTGWVHDVLGR.[N]	1xCarbamidomethyl [C5]; 1xTMT6plex [N-Term]; 1xOxidation [M9(100)]; 1xDeamidated [N6(100)]	6.90585e-07	0	1	1	5	189083844	189083844 [114-132]	0	2485.17	N6(Deamidated): 100; M9(Oxidation): 100	14	10.4	8.7	13.6	9.7	13.1	11.0333	12.1333	1.0997	0.87	Unique	3.56963	High	0	1.078e-07
CTSC	1075	189083844	NP_001805.3	53	Yes	Yes	4	NCS	SGSQRDV	CSVMGPQ	Yes	High	[R].DVNCSVMGPQEK.[K]	1xCarbamidomethyl [C4]; 2xTMT6plex [N-Term; K12]; 1xOxidation [M7(100)]; 1xDeamidated [N3(100)]	0.000163694	0	1	3	5	189083844	189083844 [51-62]	0	1838.9	N3(Deamidated): 100; M7(Oxidation): 100	22.1	20.2	12.4	8.8	11.8	11.9	18.2333	10.8333	0.59415	0.87	Unique	2.6238	High	0	0.0006346
CTSC	1075	189083844	NP_001805.3	53	Yes	Yes	4	NCS	SGSQRDV	CSVMGPQ	Yes	High	[R].DVNCSVMGPQEK.[K]	1xCarbamidomethyl [C4]; 1xTMT6plex [K12]; 1xOxidation [M7(100)]; 1xDeamidated [N3(100)]	0.174236	0.00554469	1	3	1	189083844	189083844 [51-62]	0	1609.74	N3(Deamidated): 100; M7(Oxidation): 100	18.8	13.6	14.5	5.5	18.2	7.8	15.6333	10.5	0.671642	0.87	Unique	1.40748	High	0.001833	0.04384
CTSD	1509	4503143	NP_001900.1	263	Yes	Yes	8	NVT	KGSLSYL	VTRKAYW	Yes	High	[K].GSLSYLNVTR.[K]	1xTMT6plex [N-Term]; 1xDeamidated [N7(100)]	9.38423e-05	0	1	1	14	4503143	4503143 [257-266]	0	1339.74	N7(Deamidated): 100	452.6	585	598.3	144.1	547.8	174.1	545.3	288.667	0.529372	0.77	Unique	3.79785	High	0	5.524e-06
CTSD	1509	4503143	NP_001900.1	263	Yes	Yes	11	NVT	KGSLSYL	VTRKAYW	Yes	High	[K].YYKGSLSYLNVTR.[K]	2xTMT6plex [N-Term; K3]; 1xDeamidated [N10(100)]	0.00932415	0	1	1	2	4503143	4503143 [254-266]	1	2023.13	N10(Deamidated): 100	23.4	21.7	26.1	55.8	24.1	11.2	23.7333	30.3667	1.27949	0.77	Unique	1.74253	High	0	0.0006368
CTSD	1509	4503143	NP_001900.1	263	Yes	Yes	29	NVT	KGSLSYL	VTRKAYW	Yes	High	[R].DPDAQPGGELMLGGTDSKYYKGSLSYLNVTR.[K]	3xTMT6plex [N-Term; K18; K21]; 1xOxidation [M11(100)]; 1xDeamidated [N28(100)]	0.0188061	0	1	1	2	4503143	4503143 [236-266]	2	4037.08	M11(Oxidation): 100; N28(Deamidated): 100	14.5	5.2	15.6	5.6	16	6.3	11.7667	9.3	0.790368	0.77	Unique	2.0096	High	0	0.001716
CTSF	8722	6042196	NP_003784.2	378	Yes	Yes	5	NDS	EKAKVYI	DSVELSQ	Yes	High	[K].VYINDSVELSQNEQK.[L]	2xTMT6plex [N-Term; K15]; 1xDeamidated [N4(100)]	8.40402e-05	0	1	2	5	6042196	6042196 [375-389]	0	2225.17	N4(Deamidated): 100	14.4	14.7	13.2	17.2	20.6	12.1	14.1	16.6333	1.17967	#N/A	Unique	3.54731	High	0	8.213e-07
CTSL	1514	22202619	NP_666023.1	221	Yes	Yes	6	NDT	NPKYSVA	DTGFVDI	Yes	High	[K].YSVANDTGFVDIPK.[Q]	2xTMT6plex [N-Term; K14]; 1xDeamidated [N5(100)]	0.00028011	0	1	3	5	22202619	22202619 [217-230]	0	1985.06	N5(Deamidated): 100	19.4	4.7	7.4	6.9	13.2	20.9	10.5	13.6667	1.30159	#N/A	Unique	3.25288	High	0	4.488e-06
CTSL	1514	22202619	NP_666023.1	221	Yes	Yes	6	NDT	NPKYSVA	DTGFVDI	Yes	High	[K].YSVANDTGFVDIPK.[Q]	1xTMT6plex [K14]; 1xDeamidated [N5(100)]	0.0583982	0.000598249	1	3	1	22202619	22202619 [217-230]	0	1755.9	N5(Deamidated): 100	22.3	12.3	14	27.3	23.9	20.8	16.2	24	1.48148	#N/A	Unique	2.11289	High	0.000164	0.00874
CTSL	1514	22202619	NP_666023.1	221	Yes	Yes	6	NDT	NPKYSVA	DTGFVDI	Yes	High	[K].YSVANDTGFVDIPKQEK.[A]	3xTMT6plex [N-Term; K14; K17]; 1xDeamidated [N5(100)]	2.73587e-06	0	1	3	10	22202619	22202619 [217-233]	1	2599.42	N5(Deamidated): 100	101.3	20.5	34.4	56	57.5	62.9	52.0667	58.8	1.12932	#N/A	Unique	4.13858	High	0	7.396e-08
CTSL	1514	22202619	NP_666023.1	221	Yes	Yes	6	NDT	NPKYSVA	DTGFVDI	Yes	High	[K].YSVANDTGFVDIPKQEK.[A]	2xTMT6plex [K14; K17]; 1xDeamidated [N5(100)]	7.03963e-07	0	1	3	2	22202619	22202619 [217-233]	1	2370.26	N5(Deamidated): 100	72.9	14.3	34.4	30.7	66.6	33.7	40.5333	43.6667	1.0773	#N/A	Unique	4.65785	High	0	9.63e-10
CTSV	1515	23110960	NP_001324.2	221	Yes	Yes	10	NDT	RPENSVA	DTGFTVV	No	High	[K].YRPENSVANDTGFTVVAPGK.[E]	2xTMT6plex [N-Term; K20]; 2xDeamidated [N5(100); N9(100)]	0.0554917	0.000598249	1	1	1	23110960	23110960 [213-232]	0	2582.35	N5(Deamidated): 100; N9(Deamidated): 100	9.1	5.1	11.6	5.5	7	8.6	8.6	7.03333	0.817829	#DIV/0!	Unique	1.33461	High	0.000164	0.008109
CTSV	1515	23110960	NP_001324.2	221	Yes	No	10	NDT	RPENSVA	DTGFTVV	No	High	[K].YRPENSVANDTGFTVVAPGK.[E]	2xTMT6plex [N-Term; K20]; 1xDeamidated [N]	9.7982e-05	0	1	1	8	23110960	23110960 [213-232]	0	2581.37	N5(Deamidated): 50; N9(Deamidated): 50	8.9	6.8	20.9	8.4	9.6	16.4	12.2	11.4667	0.939891	#DIV/0!	Unique	2.39888	High	0	2.946e-05
CTSV	1515	23110960	NP_001324.2	221	Yes	Yes	10	NDT	RPENSVA	DTGFTVV	No	High	[K].YRPENSVANDTGFTVVAPGK.[E]	1xTMT6plex [K20]; 1xDeamidated [N9(100)]	0.0108669	0	1	1	4	23110960	23110960 [213-232]	0	2352.2	N9(Deamidated): 100	9.8	7.5	13	9.7	8.4	10.3	10.1	9.46667	0.937294	#DIV/0!	Unique	1.56992	High	0	0.0007903
DCBLD1	285761	530383617	XP_005266998.1	171	Yes	Yes	6	NTS	VPKELLL	TSEVTVR	No	High	[K].ELLLNTSEVTVR.[F]	1xTMT6plex [N-Term]; 1xDeamidated [N5(100)]	0.00202039	0	1	5	4	530383617	530383617 [167-178]	0	1603.91	N5(Deamidated): 100	21.8	15.2	11	34.3	14.5	26.1	16	24.9667	1.56042	#N/A	Unique	2.2639	High	0.0003202	0.01113
DKK1	22943	7110719	NP_036374.1	256	Yes	Yes	8	NSS	KDHHQAS	SSRLHTC	No	High	[K].DHHQASNSSR.[L]	1xTMT6plex [N-Term]; 1xDeamidated [N7(100)]	0.0190762	0	1	1	5	7110719	7110719 [250-259]	0	1368.65	N7(Deamidated): 100	15.1		11.1	11.2	4	10	13.1	8.4	0.641221	#N/A	Unique	1.81488	High	0	0.001759
DKK1	22943	7110719	NP_036374.1	256	Yes	Yes	11	NSS	KDHHQAS	SSRLHTC	No	High	[R].IQKDHHQASNSSR.[L]	2xTMT6plex [N-Term; K3]; 1xDeamidated [N10(100)]	0.0592162	0.000598249	1	1	4	7110719	7110719 [247-259]	1	1967.05	N10(Deamidated): 100	9.3	5.6	7.6	25.6	9.4	9.3	7.5	14.7667	1.96889	#N/A	Unique	1.56109	High	0.002073	0.04693
DKK3	27122	1034573051	XP_016873043.1	204	Yes	Yes	4	NGT	KMATRGS	GTICDNQ	No	High	[R].GSNGTICDNQR.[D]	1xCarbamidomethyl [C7]; 1xTMT6plex [N-Term]; 1xDeamidated [N3(100)]	0.0770426	0.00173548	1	2	1	1034573051	1034573051 [202-212]	0	1451.67	N3(Deamidated): 100	17.8	12.8	17.6	14.2	30.6	16.2	16.0667	20.3333	1.26556	#N/A	Unique	1.67748	High	0.0004721	0.01308
DNASE2	1777	4503349	NP_001366.1	86	Yes	Yes	3	NTS	LQPLYRS	TSQLAFL	Yes	High	[R].SNTSQLAFLLYNDQPPQPSK.[A]	1xTMT6plex [K20]; 1xDeamidated [N2(99.6)]	0.0512742	0.000598249	1	1	4	4503349	4503349 [85-104]	0	2478.27	N2(Deamidated): 99.65	12	9.2	9.6	12.8	11	14.2	10.2667	12.6667	1.23377	1.08	Unique	1.60965	High	0.0003202	0.01098
DPP4	1803	18765694	NP_001926.2	685	Yes	Yes	17	NST	DNLDHYR	STVMSRA	Yes	High	[R].YMGLPTPEDNLDHYRNSTVMSR.[A]	1xTMT6plex [N-Term]; 2xOxidation [M2(100); M20(100)]; 1xDeamidated [N16(100)]	0.000515061	0	1	2	5	18765694	18765694 [670-691]	1	2858.33	M2(Oxidation): 100; N16(Deamidated): 99.37; M20(Oxidation): 100	6.2	5.9	9.7	8.9	8	8.5	7.26667	8.46667	1.16514	#N/A	Unique	2.28553	High	0	0.001496
DPP7	29952	530426726	XP_005266132.1	388	Yes	Yes	9	NAS	ALAGLVY	ASGSEHC	No	High	[R].ALAGLVYNASGSEHCYDIYR.[L]	1xCarbamidomethyl [C15]; 1xTMT6plex [N-Term]; 1xDeamidated [N8(100)]	2.80186e-05	0	1	7	3	530426726	530426726 [381-400]	0	2489.2	N8(Deamidated): 100	12	9.9	11.7	10.7	12	10.1	11.2	10.9333	0.97619	0.84	Unique	2.7991	High	0	1.744e-07
DPP7	29952	530426726	XP_005266132.1	50	Yes	Yes	4	NKT	FNFERFG	KTFPQRF	Yes	High	[R].FGNKTFPQR.[F]	1xTMT6plex [K4]; 1xDeamidated [N3(100)]	0.00311074	0	1	4	4	530426726	530426726 [48-56]	1	1324.72	N3(Deamidated): 100	4.1	8.2	20.8	4.7	7	3.8	11.0333	5.16667	0.468278	0.84	Unique	2.47941	High	0	0.0001347
DPY19L4	286148	1034660056	XP_005250951.2	197	Yes	Yes	10	NKT	VYELTHN	KTVSLKT	No	High	[R].GVYELTHNNK.[T]	2xTMT6plex [N-Term; K10]; 1xDeamidated [N9(99.7)]	0.0281319	0	1	9	3	1034660056	1034660056 [189-198]	0	1633.89	N9(Deamidated): 99.78	9.1	10.7	7	3.4	7.6	12	8.93333	7.66667	0.858209	#N/A	Unique	2.05495	High	0	0.003053
DSC2	1824	13435364	NP_077740.1	629	Yes	Yes	4	NDT	MWRLKAI	DTAARLS	No	High	[K].AINDTAAR.[L]	1xTMT6plex [N-Term]; 1xDeamidated [N3(100)]	0.130617	0.00315632	1	3	3	13435364	13435364 [627-634]	0	1061.58	N3(Deamidated): 100	14.6	6.5	42.1	8.3	8.6	14.3	21.0667	10.4	0.493671	#N/A	Unique	1.54512	High	0.001331	0.03563
DSC2	1824	13435364	NP_077740.1	392	Yes	Yes	3	NYT	NTANWRA	YTILKGN	No	High	[R].ANYTILK.[G]	2xTMT6plex [N-Term; K7]; 1xDeamidated [N2(100)]	0.196702	0.0078852	1	3	1	13435364	13435364 [391-397]	0	1281.78	N2(Deamidated): 100	19.5	7.5	72.9	8.9	13.2	13.7	33.3	11.9333	0.358358	#N/A	Unique	1.46213	High	0.002411	0.05269
DSC3	1825	148539846	NP_001932.2	392	Yes	Yes	3	NFT	NTANWRV	FTILKGN	No	High	[R].VNFTILK.[G]	2xTMT6plex [N-Term; K7]; 1xDeamidated [N2(100)]	0.0696197	0.00117085	1	2	3	148539846	148539846 [391-397]	0	1293.82	N2(Deamidated): 100	7	5.6	47.9	5.8	9.9	6.2	20.1667	7.3	0.361983	#N/A	Unique	2.16642	High	0.0007256	0.02305
DSE	29940	1018443345	NP_001309868.1	661	Yes	Yes	6	NGT	YPRGYPY	GTNYVNV	No	High	[R].GYPYNGTNYVNVTMHLR.[S]	1xTMT6plex [N-Term]; 1xOxidation [M14(100)]; 2xDeamidated [N5(100); N11(100)]	0.100919	0.00222925	1	3	3	1018443345	1018443345 [657-673]	0	2246.07	N5(Deamidated): 100; N11(Deamidated): 100; M14(Oxidation): 100	10.6	12.1	13.7	17.8	11.2	13	12.1333	14	1.15385	#N/A	Unique	1.62671	High	0.0005939	0.01943
DSG2	1829	116534898	NP_001934.2	182	Yes	Yes	3	NAT	HTLVMKI	ATDADEP	No	High	[K].INATDADEPNTLNSK.[I]	2xTMT6plex [N-Term; K15]; 2xDeamidated [N2(100); N13(100)]	0.0139978	0	1	1	10	116534898	116534898 [181-195]	0	2063.05	N2(Deamidated): 100; N13(Deamidated): 100	22.1	43.5	37	18.7	20.4	30.5	34.2	23.2	0.678363	0.85	Unique	2.62523	High	0	0.001132
DSG2	1829	116534898	NP_001934.2	182	Yes	Yes	3	NAT	HTLVMKI	ATDADEP	No	High	[K].INATDADEPNTLNSK.[I]	2xTMT6plex [N-Term; K15]; 1xDeamidated [N2(100)]	4.37773e-06	0	1	1	6	116534898	116534898 [181-195]	0	2062.07	N2(Deamidated): 100	14.7	43.4	40.5	14.7	18.5	22.4	32.8667	18.5333	0.563895	0.85	Unique	3.49124	High	0	7.399e-07
DSG2	1829	116534898	NP_001934.2	182	Yes	Yes	3	NAT	HTLVMKI	ATDADEP	No	High	[K].INATDADEPNTLNSK.[I]	1xTMT6plex [K15]; 2xDeamidated [N2(100); N10(100)]	0.00387843	0	1	1	3	116534898	116534898 [181-195]	0	1833.89	N2(Deamidated): 100; N13(Deamidated): 99.74	8.3	28.9	27.3	7.1	10.4	9.4	21.5	8.96667	0.417054	0.85	Unique	2.04643	High	0	0.0001839
DSG2	1829	116534898	NP_001934.2	182	Yes	Yes	3	NAT	HTLVMKI	ATDADEP	No	High	[K].INATDADEPNTLNSK.[I]	1xTMT6plex [K15]; 1xDeamidated [N2(100)]	0.00807628	0	1	1	3	116534898	116534898 [181-195]	0	1832.91	N2(Deamidated): 100	7	20.6	16	12.5	9	11.1	14.5333	10.8667	0.747706	0.85	Unique	2.31999	High	0	0.0005192
DSG2	1829	116534898	NP_001934.2	462	Yes	Yes	5	NGT	FESRYVQ	GTYTVKI	No	High	[R].YVQNGTYTVK.[I]	2xTMT6plex [N-Term; K10]; 1xDeamidated [N4(100)]	8.44594e-06	0	1	1	9	116534898	116534898 [459-468]	0	1631.9	N4(Deamidated): 100	28.9	92.9	75.1	42.7	35.7	42.1	65.6333	40.1667	0.611986	0.85	Unique	3.49775	High	0	3.202e-08
DSG2	1829	116534898	NP_001934.2	462	Yes	Yes	5	NGT	FESRYVQ	GTYTVKI	No	High	[R].YVQNGTYTVK.[I]	1xTMT6plex [K10]; 1xDeamidated [N4(100)]	0.0150359	0	1	1	6	116534898	116534898 [459-468]	0	1402.74	N4(Deamidated): 100	43.8	107.2	113.6	37.9	52.6	48.2	88.2	46.2333	0.524187	0.85	Unique	2.97676	High	0.0003202	0.01049
ECE1	1889	767902817	XP_011539174.1	174	Yes	Yes	6	NST	IIKHLLE	STASVSE	No	High	[K].HLLENSTASVSEAER.[K]	1xTMT6plex [N-Term]; 1xDeamidated [N5(100)]	2.46223e-07	0	1	6	12	767902817	767902817 [170-184]	0	1872.95	N5(Deamidated): 100	29.5	37.1	87.8	51.8	52.7	36	51.4667	46.8333	0.909974	0.9	Unique	4.87615	High	0	5.925e-09
ECE1	1889	767902817	XP_011539174.1	174	Yes	Yes	6	NST	IIKHLLE	STASVSE	No	High	[K].HLLENSTASVSEAERK.[A]	2xTMT6plex [N-Term; K16]; 1xDeamidated [N5(100)]	6.90484e-06	0	1	6	7	767902817	767902817 [170-185]	1	2230.21	N5(Deamidated): 100	21.3	21.3	60.1	19.1	38.6	23.4	34.2333	27.0333	0.789679	0.9	Unique	2.83451	High	0	2.416e-08
ECE1	1889	767902817	XP_011539174.1	174	Yes	Yes	6	NST	IIKHLLE	STASVSE	No	High	[K].HLLENSTASVSEAERK.[A]	1xTMT6plex [K16]; 1xDeamidated [N5(100)]	5.30523e-08	0	1	6	7	767902817	767902817 [170-185]	1	2001.05	N5(Deamidated): 100	20.7	21.6	36.9	17.8	28.4	15.7	26.4	20.6333	0.781566	0.9	Unique	3.66991	High	0	2.505e-11
ECE1	1889	767902817	XP_011539174.1	324	Yes	Yes	27	NIT	DFETALA	ITIPQEK	No	High	[K].LLGGGDEEAIRPQMQQILDFETALANITIPQEK.[R]	2xTMT6plex [N-Term; K33]; 1xOxidation [M14(100)]; 1xDeamidated [N26(100)]	4.53119e-12	0	1	6	7	767902817	767902817 [299-331]	0	4114.18	M14(Oxidation): 100; N26(Deamidated): 100	141.9	143.9	326	109.7	190.6	135.8	203.933	145.367	0.712815	0.9	Unique	8.00216	High	0	9.374e-15
ECE1	1889	767902817	XP_011539174.1	278	Yes	Yes	25	NKT	PSRDYYL	KTENEKV	No	High	[K].NSNSNVIQVDQSGLGLPSRDYYLNKTENEK.[V]	2xTMT6plex [K25; K30]; 3xDeamidated [N3(98.8); N5(99.4); N24(99.4)]	0.0404083	0	1	6	1	767902817	767902817 [255-284]	2	3843.93	N3(Deamidated): 98.8; N5(Deamidated): 99.39; N24(Deamidated): 99.4		14.9	28.6	9.5	19.5	10.8	21.75	13.2667	0.609962	0.9	Unique	1.85296	High	0	0.00513
ECE1	1889	767902817	XP_011539174.1	640	Yes	Yes	2	NSS	NLRPWWK	SSVEAFK	No	High	[K].NSSVEAFKR.[Q]	1xTMT6plex [K8]; 1xDeamidated [N1(100)]	0.193348	0.00742786	1	6	1	767902817	767902817 [640-648]	1	1267.68	N1(Deamidated): 100	3.3	4.3	16.9	3	8.5	7.8	8.16667	6.43333	0.787755	0.9	Unique	1.20455	High	0.002301	0.05116
ECE1	1889	767902817	XP_011539174.1	278	Yes	Yes	6	NKT	PSRDYYL	KTENEKV	No	High	[R].DYYLNKTENEK.[V]	2xTMT6plex [K6; K11]; 2xDeamidated [N5(100); N9(100)]	0.0623118	0.000598249	1	6	2	767902817	767902817 [274-284]	1	1876.96	N5(Deamidated): 100; N9(Deamidated): 100	9	8.5	25.6	7.8	17.3	13.9	14.3667	13	0.904872	0.9	Unique	1.05942	High	0.000164	0.009751
ECE1	1889	767902817	XP_011539174.1	278	Yes	Yes	6	NKT	PSRDYYL	KTENEKV	No	High	[R].DYYLNKTENEK.[V]	2xTMT6plex [K6; K11]; 1xDeamidated [N5(100)]	0.00339116	0	1	6	3	767902817	767902817 [274-284]	1	1875.97	N5(Deamidated): 100	16.7	17.3	62.6	10.8	43.4	15.9	32.2	23.3667	0.725673	0.9	Unique	3.01302	High	0	0.001811
ECE1	1889	767902817	XP_011539174.1	278	Yes	Yes	6	NKT	PSRDYYL	KTENEKV	No	High	[R].DYYLNKTENEK.[V]	3xTMT6plex [N-Term; K6; K11]; 1xDeamidated [N5(100)]	7.60118e-07	0	1	6	8	767902817	767902817 [274-284]	1	2105.14	N5(Deamidated): 100	34.8	36.8	163.5	18.5	107.6	38.5	78.3667	54.8667	0.700128	0.9	Unique	3.56625	High	0	1.071e-09
ECE1	1889	767902817	XP_011539174.1	278	Yes	Yes	6	NKT	PSRDYYL	KTENEKV	No	High	[R].DYYLNKTENEK.[V]	3xTMT6plex [N-Term; K6; K11]; 2xDeamidated [N5(100); N9(100)]	0.0127842	0	1	6	4	767902817	767902817 [274-284]	1	2106.12	N5(Deamidated): 100; N9(Deamidated): 100	34.4	25.5	92.9	24.7	63.2	33.4	50.9333	40.4333	0.793848	0.9	Unique	1.62394	High	0	0.0009945
ECE1	1889	767902817	XP_011539174.1	218	Yes	Yes	6	NIT	IERLGGW	ITGPWAK	No	High	[R].LGGWNITGPWAK.[D]	1xTMT6plex [K12]; 1xDeamidated [N5(100)]	0.135995	0.00315632	1	6	1	767902817	767902817 [214-225]	0	1529.83	N5(Deamidated): 100	18.2	12.9	31.9	12.7	18.2	17.9	21	16.2667	0.774603	0.9	Unique	1.56371	High	0.0009713	0.03025
EEF1A1	1915	4503471	NP_001393.1	284	Yes	Yes	19	NVT	VVTFAPV	VTTEVKS	No	High	[R].VETGVLKPGMVVTFAPVNVTTEVK.[S]	2xTMT6plex [K7; K24]; 1xOxidation [M10(100)]; 1xDeamidated [N18(100)]	0.0449981	0	1	1	4	4503471	4503471 [267-290]	0	2990.69	M10(Oxidation): 100; N18(Deamidated): 100	9.4	7.6	7.9	13	8.1	10.4	8.3	10.5	1.26506	1.17	Unique	1.61269	High	0	0.006005
EFCAB14	9813	7662160	NP_055589.1	347	Yes	Yes	9	NRT	QSLDQVT	RTDTVKI	No	High	[R].QSLDQVTNR.[T]	1xTMT6plex [N-Term]; 1xDeamidated [N8(100)]	0.203561	0.00836914	1	1	1	7662160	7662160 [340-348]	0	1290.69	N8(Deamidated): 100	30.4	28.8	11.6	9.9	12.8	24.8	23.6	15.8333	0.670904	#N/A	Unique	1.82302	High	0.002661	0.05569
EFCAB14	9813	7662160	NP_055589.1	347	Yes	Yes	9	NRT	QSLDQVT	RTDTVKI	No	High	[R].QSLDQVTNRTDTVK.[I]	2xTMT6plex [N-Term; K14]; 1xDeamidated [N8(100)]	0.000872908	0	1	1	3	7662160	7662160 [340-353]	1	2064.13	N8(Deamidated): 100	23	33.9	13	26.8	15.4	11.8	23.3	18	0.772532	#N/A	Unique	1.98061	High	0	2.248e-05
EFCAB14	9813	7662160	NP_055589.1	347	Yes	Yes	9	NRT	QSLDQVT	RTDTVKI	No	High	[R].QSLDQVTNRTDTVK.[I]	1xTMT6plex [K14]; 1xDeamidated [N8(100)]	0.0190762	0	1	1	3	7662160	7662160 [340-353]	1	1834.97	N8(Deamidated): 100	8.9	12.5	6.4	10.5	9.4	6.9	9.26667	8.93333	0.964029	#N/A	Unique	1.80124	High	0	0.001755
EFNA5	1946	4503487	NP_001953.1	37	Yes	Yes	7	NSS	DRYAVYW	SSNPRFQ	No	High	[R].YAVYWNSSNPR.[F]	1xTMT6plex [N-Term]; 1xDeamidated [N6(100)]	0.00349014	0	1	2	4	4503487	4503487 [32-42]	0	1586.78	N6(Deamidated): 99.78	17.4	20.3	16.8	19.9	17.5	26.5	18.1667	21.3	1.17248	#N/A	Unique	1.99731	High	0	0.0006237
EFNB1	1947	4758248	NP_004420.1	139	Yes	Yes	12	NGS	YYITSTS	GSLEGLE	No	High	[K].HHDYYITSTSNGSLEGLENR.[E]	1xTMT6plex [N-Term]; 1xDeamidated [N11(99.6)]	0.124872	0.00315632	1	1	3	4758248	4758248 [129-148]	0	2523.19	N11(Deamidated): 99.6	3.9	6.7	4.8	9.6	5.6	7.2	5.13333	7.46667	1.45455	#N/A	Unique	1.29829	High	0.00084	0.02661
EFNB3	1949	4503489	NP_001397.1	210	Yes	Yes	21	NAT	LPGDPTS	ATSRGAE	No	High	[R].GAAHSLEPGKENLPGDPTSNATSR.[G]	2xTMT6plex [N-Term; K10]; 1xDeamidated [N20(100)]	1.56835e-06	0	1	1	4	4503489	4503489 [191-214]	1	2865.47	N20(Deamidated): 100	5.1	6.5	14.1	7.9	7.3	5.3	8.56667	6.83333	0.797665	#N/A	Unique	3.32283	High	0	2.975e-09
EGFR	1956	29725609	NP_005219.2	352	Yes	Yes	7	NAT	FKDSLSI	ATNIKHF	Yes	High	[K].DSLSINATNIK.[H]	2xTMT6plex [N-Term; K11]; 2xDeamidated [N6(100); N9(100)]	0.0344493	0	1	4	1	29725609	29725609 [347-357]	0	1635.92	N6(Deamidated): 100; N9(Deamidated): 100	28.9	13.5	21.2	24.7	19.2	19.7	21.2	21.2	1	0.85	Unique	1.60206	High	0	0.004086
EGFR	1956	29725609	NP_005219.2	352	Yes	Yes	7	NAT	FKDSLSI	ATNIKHF	Yes	High	[K].DSLSINATNIK.[H]	2xTMT6plex [N-Term; K11]; 1xDeamidated [N6(100)]	3.7559e-08	0	1	4	8	29725609	29725609 [347-357]	0	1634.94	N6(Deamidated): 100	58.8	33.2	71.8	14.6	45.5	45.7	54.6	35.2667	0.64591	0.85	Unique	4.82372	High	0	1.532e-11
EGFR	1956	29725609	NP_005219.2	352	Yes	Yes	7	NAT	FKDSLSI	ATNIKHF	Yes	High	[K].DSLSINATNIK.[H]	1xTMT6plex [K11]; 1xDeamidated [N6(100)]	0.00955001	0	1	4	5	29725609	29725609 [347-357]	0	1405.77	N6(Deamidated): 100	43.6	33.3	58.4	21	40.5	36.7	45.1	32.7333	0.725795	0.85	Unique	3.35368	High	0	0.001394
EMB	133418	38348215	NP_940851.1	213	Yes	Yes	5	NGT	QMNKYVI	GTYANET	Yes	High	[K].YVINGTYANETK.[L]	2xTMT6plex [N-Term; K12]; 2xDeamidated [N4(100); N9(100)]	0.00125076	0	1	2	5	38348215	38348215 [210-221]	0	1832.97	N4(Deamidated): 100; N9(Deamidated): 100	22.9	28.9	22.6	12.5	27.1	31.9	24.8	23.8333	0.961022	#N/A	Unique	2.68333	High	0	5.772e-05
EMB	133418	38348215	NP_940851.1	213	Yes	Yes	5	NGT	QMNKYVI	GTYANET	Yes	High	[K].YVINGTYANETK.[L]	1xTMT6plex [K12]; 2xDeamidated [N4(100); N9(100)]	0.000586268	0	1	2	4	38348215	38348215 [210-221]	0	1603.81	N4(Deamidated): 100; N9(Deamidated): 100	16.1	17.6	16.6	13.5	19	15.3	16.7667	15.9333	0.950298	#N/A	Unique	2.79238	High	0	2.364e-05
EMC1	23065	530360927	XP_005245844.1	916	Yes	Yes	6	NQT	AERFINY	QTVSRMR	No	High	[R].FINYNQTVSR.[M]	1xTMT6plex [N-Term]; 2xDeamidated [N3(100); N5(100)]	0.0137989	0	1	6	4	530360927	530360927 [912-921]	0	1472.76	N3(Deamidated): 100; N5(Deamidated): 100	25.5	20.8	19.9	29.8	20.4	30.6	22.0667	26.9333	1.22054	1.07	Unique	2.28834	High	0	0.001106
EMC1	23065	530360927	XP_005245844.1	916	Yes	Yes	6	NQT	AERFINY	QTVSRMR	No	High	[R].FINYNQTVSR.[M]	1xTMT6plex [N-Term]; 1xDeamidated [N]	0.000135767	0	1	6	3	530360927	530360927 [912-921]	0	1471.77	N5(Deamidated): 100	61.1	43.6	39.1	50	36.4	74.6	47.9333	53.6667	1.11961	1.07	Unique	2.98577	High	0	1.618e-06
ENPP1	5167	170650661	NP_006199.2	285	Yes	Yes	3	NAS	KMYDPKM	ASFSLKS	Yes	High	[K].MNASFSLK.[S]	1xTMT6plex [K8]; 1xOxidation [M1(100)]; 1xDeamidated [N2(100)]	0.0467106	0.000598249	1	1	3	170650661	170650661 [284-291]	0	1143.59	M1(Oxidation): 100; N2(Deamidated): 100	15.1	10.1	9.3	8.6	10	13.5	11.5	10.7	0.930435	#N/A	Unique	1.69924	High	0.000164	0.006353
EOGT	285203	767922978	XP_011531904.1	372	Yes	Yes	3	NIT	QHVLHRL	ITQEGPK	No	High	[R].LNITQEGPK.[D]	2xTMT6plex [N-Term; K9]; 1xDeamidated [N2(100)]	8.52583e-05	0	1	5	5	767922978	767922978 [371-379]	0	1458.86	N2(Deamidated): 100	27	21.4	34.2	18.3	45	46.6	27.5333	36.6333	1.33051	#N/A	Unique	2.87849	High	0	8.396e-07
EOGT	285203	767922978	XP_011531904.1	372	Yes	Yes	3	NIT	QHVLHRL	ITQEGPK	No	High	[R].LNITQEGPK.[D]	1xTMT6plex [K9]; 1xDeamidated [N2(100)]	0.0617375	0.000598249	1	5	3	767922978	767922978 [371-379]	0	1229.69	N2(Deamidated): 100	14.7	9	16.3	11.7	16.8	19.4	13.3333	15.9667	1.1975	#N/A	Unique	1.67284	High	0.006444	0.1098
EOGT	285203	767922978	XP_011531904.1	372	Yes	Yes	3	NIT	QHVLHRL	ITQEGPK	No	High	[R].LNITQEGPKDGK.[I]	3xTMT6plex [N-Term; K9; K12]; 1xDeamidated [N2(100)]	0.00163607	0	1	5	2	767922978	767922978 [371-382]	1	1988.16	N2(Deamidated): 100	29.4	22.4	40.3	18.4	36.2	27.9	30.7	27.5	0.895765	#N/A	Unique	1.87669	High	0	5.446e-05
EOGT	285203	767922978	XP_011531904.1	372	Yes	Yes	3	NIT	QHVLHRL	ITQEGPK	No	High	[R].LNITQEGPKDGK.[I]	2xTMT6plex [K9; K12]; 1xDeamidated [N2(100)]	0.0417546	0	1	5	2	767922978	767922978 [371-382]	1	1759	N2(Deamidated): 100	24.5	7.7	26.8	11.5	52.2	13.7	19.6667	25.8	1.31186	#N/A	Unique	1.49066	High	0.002301	0.05061
EPHA1	2041	221316650	NP_005223.4	478	Yes	Yes	6	NLT	RPRSPGA	LTYELHV	No	High	[R].SPGANLTYELHVLNQDEER.[Y]	1xTMT6plex [N-Term]; 1xDeamidated [N5(100)]	3.17402e-05	0	1	2	1	221316650	221316650 [474-492]	0	2415.2	N5(Deamidated): 100	10.1	13.7	5.6	10	6.5	9.3	9.8	8.6	0.877551	#N/A	Unique	2.84985	High	0	2.077e-07
EPHA2	1969	32967311	NP_004422.2	435	Yes	Yes	8	NQT	RTASVSI	QTEPPKV	No	High	[R].TASVSINQTEPPK.[V]	2xTMT6plex [N-Term; K13]; 1xDeamidated [N7(100)]	0.00344029	0	1	5	4	32967311	32967311 [429-441]	0	1831.02	N7(Deamidated): 100	8.3		13.4	12	9.9	40.3	10.85	20.7333	1.91091	1.68	Unique	2.74926	High	0	0.0001559
EPHA2	1969	32967311	NP_004422.2	435	Yes	Yes	8	NQT	RTASVSI	QTEPPKV	No	High	[R].TASVSINQTEPPK.[V]	1xTMT6plex [K13]; 1xDeamidated [N7(100)]	0.000836033	0	1	5	10	32967311	32967311 [429-441]	0	1601.86	N7(Deamidated): 100	29.2	19.3	39	36.2	46.1	92.3	29.1667	58.2	1.99543	1.68	Unique	3.13409	High	0	2.112e-05
EPHA2	1969	32967311	NP_004422.2	435	Yes	Yes	8	NQT	RTASVSI	QTEPPKV	No	High	[R].TASVSINQTEPPKVR.[L]	2xTMT6plex [N-Term; K13]; 1xDeamidated [N7(100)]	1.54572e-05	0	1	5	3	32967311	32967311 [429-443]	1	2086.19	N7(Deamidated): 100	10.2	6.6	10.7	50.9	10.9	18.2	9.16667	26.6667	2.90909	1.68	Unique	3.65159	High	0	7.52e-08
EPHA2	1969	32967311	NP_004422.2	435	Yes	Yes	8	NQT	RTASVSI	QTEPPKV	No	High	[R].TASVSINQTEPPKVR.[L]	1xTMT6plex [K13]; 1xDeamidated [N7(100)]	0.00145123	0	1	5	5	32967311	32967311 [429-443]	1	1857.03	N7(Deamidated): 100	12.2	9.5	9.7	20.2	8.3	11.3	10.4667	13.2667	1.26752	1.68	Unique	2.43915	High	0	4.6e-05
EPHA2	1969	32967311	NP_004422.2	407	Yes	Yes	14	NYT	SDLEPHM	YTFTVEA	No	High	[R].TSVTVSDLEPHMNYTFTVEAR.[N]	1xTMT6plex [N-Term]; 1xOxidation [M12(100)]; 1xDeamidated [N13(100)]	4.07441e-07	0	1	5	11	32967311	32967311 [395-415]	0	2643.28	M12(Oxidation): 100; N13(Deamidated): 100	18.1	16.6	18.7	32.7	19.2	30.8	17.8	27.5667	1.54869	1.68	Unique	3.48051	High	0	4.432e-10
EPHB2	2048	822606583	NP_001296122.1	482	Yes	Yes	7	NAT	EKELSEY	ATAIKSP	No	High	[K].ELSEYNATAIK.[S]	2xTMT6plex [N-Term; K11]; 1xDeamidated [N6(100)]	4.93692e-08	0	1	5	7	822606583	822606583 [477-487]	0	1697.94	N6(Deamidated): 100	46.5	42	39.2	37	92.3	86.5	42.5667	71.9333	1.6899	#N/A	Unique	4.59472	High	0	1.073e-10
EPHB2	2048	822606583	NP_001296122.1	482	Yes	Yes	7	NAT	EKELSEY	ATAIKSP	No	High	[K].ELSEYNATAIK.[S]	1xTMT6plex [K11]; 1xDeamidated [N6(100)]	0.0105595	0	1	5	4	822606583	822606583 [477-487]	0	1468.77	N6(Deamidated): 100	16.3	12.9	14.3	10.8	24.7	20.4	14.5	18.6333	1.28506	#N/A	Unique	2.35972	High	0	0.001158
ERAP2	64167	11641261	NP_071745.1	119	Yes	Yes	7	NAT	SKDLEIT	ATLQSEE	Yes	High	[K].DLEITNATLQSEEDSR.[Y]	1xTMT6plex [N-Term]; 1xDeamidated [N6(100)]	3.64772e-05	0	1	2	3	11641261	11641261 [114-129]	0	2051	N6(Deamidated): 100	17.7	29.7		18.2			23.7	18.2	0.767932	#N/A	Unique	2.48797	High	0	3.9e-05
ERAP2	64167	11641261	NP_071745.1	431	Yes	Yes	5	NSS	VITKDSL	SSRPISK	No	High	[K].DSLNSSRPISKPAETPTQIQEMFDEVSYNK.[G]	2xTMT6plex [K11; K30]; 1xOxidation [M22(100)]; 1xDeamidated [N4(100)]	0.146062	0.00357109	1	2	1	11641261	11641261 [428-457]	0	3886.94	N4(Deamidated): 100; M22(Oxidation): 100	7.6	8.7	2.8	3.6	2.2		6.36667	2.9	0.455497	#N/A	Unique	1.18016	High	0.001331	0.0336
ERAP2	64167	11641261	NP_071745.1	714	Yes	Yes	2	NIS	YHMMDRR	ISDISEN	No	High	[R].NISDISENLKR.[Y]	1xTMT6plex [K10]; 1xDeamidated [N1(100)]	0.179633	0.00650338	1	2	1	11641261	11641261 [714-724]	1	1518.83	N1(Deamidated): 100	11.2	10.5	2.9		2.5		8.2	2.5	0.304878	#N/A	Unique	0.980811	High	0.002073	0.04597
ERAP2	64167	11641261	NP_071745.1	294	Yes	Yes	2	NQT	YASPDKR	QTHYALQ	No	High	[R].NQTHYALQASLK.[L]	1xTMT6plex [K12]; 1xDeamidated [N1(100)]	0.00141007	0	1	2	2	11641261	11641261 [294-305]	0	1603.86	N1(Deamidated): 100	27.7	22.2	56.6	11.4	11.8	16.4	35.5	13.2	0.371831	#N/A	Unique	2.35308	High	0	4.4e-05
ERGIC2	51290	50959176	NP_057654.2	212	Yes	Yes	16	NFS	LVNHESY	FSHRIDH	No	High	[R].GHAHLAALVNHESYNFSHR.[I]	1xTMT6plex [N-Term]; 1xDeamidated [N15(99.7)]	0.0039158	0	1	1	2	50959176	50959176 [198-216]	0	2390.2	N15(Deamidated): 99.62	6.7	5.3	6.7	5.6	8.9	5.5	6.23333	6.66667	1.06952	1.12	Unique	1.9099	High	0	0.0001867
ERLIN1	10613	530392883	XP_005269499.1	108	Yes	Yes	2	NYT	AVFDIVR	YTADYDK	No	High	[R].NYTADYDKTLIFNK.[I]	2xTMT6plex [K8; K14]; 1xDeamidated [N1(100)]	4.39809e-05	0	1	1	5	530392883	530392883 [108-121]	1	2165.15	N1(Deamidated): 100	25.8	13.8	17.9	13.2	19.6	40.7	19.1667	24.5	1.27826	1.19	Unique	2.82589	High	0	3.297e-07
ERLIN1	10613	530392883	XP_005269499.1	94	Yes	Yes	3	NYT	KCATVTE	ATGDLAT	No	High	[RK].NYTADYDK.[TA]	1xTMT6plex [K8]; 1xDeamidated [N1(100)]	0.114085	0.00315632	1	4	3	530392883	530392883 [108-115]	0	1219.57	N1(Deamidated): 100	32.8	28	21.3	12	24.3	52	27.3667	29.4333	1.07552	1.19	Unique	2.03231	High	0.001331	0.03568
ERO1A	30001	7657069	NP_055399.1	280	Yes	Yes	6	NIT	LEKKWGH	ITEFQQR	No	High	[K].KWGHNITEFQQR.[F]	2xTMT6plex [K1; N-Term]; 1xDeamidated [N5(100)]	0.0447883	0	1	2	2	7657069	7657069 [276-287]	1	2003.09	N5(Deamidated): 100	16.2	27.2	16.1	14	11.5	26.8	19.8333	17.4333	0.878992	1	Unique	1.41492	High	0.0007256	0.02144
ERO1A	30001	7657069	NP_055399.1	280	Yes	Yes	5	NIT	LEKKWGH	ITEFQQR	No	High	[K].WGHNITEFQQR.[F]	1xTMT6plex [N-Term]; 1xDeamidated [N4(100)]	0.00357483	0	1	2	5	7657069	7657069 [277-287]	0	1645.83	N4(Deamidated): 100	25.7	16.7	15.3	14.2	20.3	25.3	19.2333	19.9333	1.0364	1	Unique	2.18916	High	0	0.001735
ERO1B	56605	239582761	NP_063944.3	140	Yes	Yes	6	NST	ANKLGAI	STLSNQS	Yes	High	[K].LGAINSTLSNQSK.[E]	1xTMT6plex [K13]; 2xDeamidated [N5(100); N10(100)]	0.00408849	0	1	2	3	239582761	239582761 [136-148]	0	1563.84	N5(Deamidated): 100; N10(Deamidated): 100	13.7	18.6	19.7	9.4	14.9	13.7	17.3333	12.6667	0.730769	#N/A	Unique	2.48894	High	0	0.0002512
ERP29	10961	5803013	NP_006808.1	187	Yes	Yes	6	NLS	LLKQGQD	LSSVKET	No	High	[K].QGQDNLSSVK.[E]	1xTMT6plex [K10]; 1xDeamidated [N5(100)]	0.0192583	0	1	2	2	5803013	5803013 [183-192]	0	1305.68	N5(Deamidated): 100	17	17	12.9	15.2	13.4	17.1	15.6333	15.2333	0.974414	1.27	Unique	2.47738	High	0.000164	0.008089
EXT1	2131	46370066	NP_000118.2	89	Yes	Yes	4	NSS	PRQKRDA	SSIYKGK	No	High	[R].DANSSIYK.[G]	2xTMT6plex [N-Term; K8]; 1xDeamidated [N3(100)]	0.0981982	0.00222925	1	1	2	46370066	46370066 [87-94]	0	1356.74	N3(Deamidated): 100	21.9	25	14.1	31.7	29.2	36.6	20.3333	32.5	1.59836	#N/A	Unique	1.88818	High	0.0005939	0.0187
EXTL3	2137	4503617	NP_001431.1	290	Yes	Yes	11	NVS	DTQNLLY	VSTGRAM	Yes	High	[R].KSDTQNLLYNVSTGR.[A]	2xTMT6plex [K1; N-Term]; 1xDeamidated [N]	0.0110768	0	1	1	4	4503617	4503617 [281-295]	1	2155.18	N10(Deamidated): 100	11.7	13.8	7.7	7.9	10.4	13.7	11.0667	10.6667	0.963855	#N/A	Unique	1.82155	High	0	0.0008083
EXTL3	2137	4503617	NP_001431.1	290	Yes	Yes	11	NVS	DTQNLLY	VSTGRAM	Yes	High	[R].KSDTQNLLYNVSTGR.[A]	1xTMT6plex [K1]; 1xDeamidated [N10(100)]	0.0279994	0	1	1	3	4503617	4503617 [281-295]	1	1926.01	N10(Deamidated): 100	5.7	5.6	4.8	6.1	6.4	7.8	5.36667	6.76667	1.26087	#N/A	Unique	1.80461	High	0	0.003686
F2R	2149	166362740	NP_001983.2	35	Yes	Yes	4	NAT	RPESKAT	ATLDPRS	No	High	[K].ATNATLDPR.[S]	1xTMT6plex [N-Term]; 1xDeamidated [N3(100)]	0.122089	0.00315632	1	1	3	166362740	166362740 [33-41]	0	1188.64	N3(Deamidated): 100	30.5	6.6	19.3	9.4	20	22.2	18.8	17.2	0.914894	#N/A	Unique	2.30265	High	0.00084	0.02571
F2R	2149	166362740	NP_001983.2	62	Yes	Yes	17	NES	FWEDEEK	ESGLTEY	No	High	[R].NPNDKYEPFWEDEEKNESGLTEYR.[L]	3xTMT6plex [N-Term; K5; K15]; 1xDeamidated [N16(100)]	0.112545	0.00274374	1	1	1	166362740	166362740 [47-70]	2	3677.79	N16(Deamidated): 100	25.4	4.9	23.8	8.1	24.8	17.7	18.0333	16.8667	0.935305	#N/A	Unique	1.46038	High	0.0007256	0.02294
F3	2152	4503641	NP_001984.1	156	Yes	Yes	3	NVT	EQVGTKV	VTVEDER	Yes	High	[K].VNVTVEDER.[T]	1xTMT6plex [N-Term]; 1xDeamidated [N2(100)]	0.00091579	0	1	2	7	4503641	4503641 [155-163]	0	1290.67	N2(Deamidated): 100	692.4	53.4	93.6	239.1	338.4	23	279.8	200.167	0.715392	#DIV/0!	Unique	3.66251	High	0	9.235e-05
FAM171A1	221061	63025206	NP_001010924.1	190	Yes	Yes	6	NGT	YLRGLDG	GTGNSTR	No	High	[R].GLDGNGTGNSTR.[H]	1xTMT6plex [N-Term]; 2xDeamidated [N5(100); N9(100)]	0.0352684	0	1	3	5	63025206	63025206 [186-197]	0	1379.66	N5(Deamidated): 100; N9(Deamidated): 100	14.9	8.7	16.7	17	25.3	36.3	13.4333	26.2	1.95037	#N/A	Unique	2.38229	High	0	0.004234
FAM171A2	284069	222831660	NP_940877.2	66	Yes	Yes	9	NRT	ASVDVFG	RTLLAAG	No	High	[R].ASVDVFGNR.[T]	1xTMT6plex [N-Term]; 1xDeamidated [N8(100)]	0.188408	0.00695865	1	1	1	222831660	222831660 [59-67]	0	1194.63	N8(Deamidated): 100	14.7	25.7	24.2	20.2	14	29.1	21.5333	21.1	0.979876	#N/A	Unique	1.97399	High	0.002187	0.04944
FAM174A	345757	578810321	XP_006714663.1	83	Yes	Yes	7	NGS	PRGSEGG	GSNPVAG	Yes	High	[R].GSEGGNGSNPVAGLETDDHGGK.[A]	2xTMT6plex [N-Term; K22]; 2xDeamidated [N6(100); N9(100)]	0.214225	0.00926046	1	2	1	578810321	578810321 [78-99]	0	2515.19	N6(Deamidated): 100; N9(Deamidated): 100	13.6	10.7	8.1	9.4	9.7	6.6	10.8	8.56667	0.79321	#N/A	Unique	2.12582	High	0.002989	0.06
FAM174A	345757	578810321	XP_006714663.1	83	Yes	Yes	7	NGS	PRGSEGG	GSNPVAG	Yes	High	[R].GSEGGNGSNPVAGLETDDHGGK.[A]	2xTMT6plex [N-Term; K22]; 1xDeamidated [N6(100)]	3.14878e-16	0	1	2	6	578810321	578810321 [78-99]	0	2514.21	N6(Deamidated): 100	39.5	40.5	21.5	26.9	29.6	31.9	33.8333	29.4667	0.870936	#N/A	Unique	6.88576	High	0	6.076e-23
FAM174B	400451	150170694	NP_997329.2	53	Yes	Yes	13	NTT	PPGPGPG	TTRFGSG	No	High	[R].ESRPPPGPGPGNTTR.[F]	1xTMT6plex [N-Term]; 1xDeamidated [N12(100)]	1.04306e-05	0	1	1	3	150170694	150170694 [42-56]	0	1749.91	N12(Deamidated): 100	25.2	16.4	4.6	8.7	13.3	7.3	15.4	9.76667	0.634199	#N/A	Unique	2.66687	High	0	4.313e-08
FAM234A	83986	767987709	XP_011520993.1	116	Yes	Yes	4	NSS	LFLYKNT	SSNNFSR	Yes	High	[K].NTNSSNNFSR.[S]	1xTMT6plex [N-Term]; 3xDeamidated [N3(99.7); N6(100); N7(100)]	0.0255951	0	1	4	3	767987709	767987709 [114-123]	0	1372.62	N3(Deamidated): 99.74; N6(Deamidated): 100; N7(Deamidated): 100	27.8	14.4	15.1	18	21.3	22.5	19.1	20.6	1.07853	#N/A	Unique	2.28323	High	0	0.002664
FAM234A	83986	767987709	XP_011520993.1	116	Yes	Yes	4	NSS	LFLYKNT	SSNNFSR	Yes	High	[K].NTNSSNNFSR.[S]	1xTMT6plex [N-Term]; 2xDeamidated [N3(99.5); N]	0.0413655	0	1	4	1	767987709	767987709 [114-123]	0	1371.63	N3(Deamidated): 99.69; N6(Deamidated): 50; N7(Deamidated): 50	35.7	31.7	23	34.4	29.6	32.7	30.1333	32.2333	1.06969	#N/A	Unique	2.0753	High	0	0.005333
FAM234A	83986	767987709	XP_011520993.1	314	Yes	Yes	11	NAT	PHWESML	ATTRRML	Yes	High	[K].SDPHWESMLNATTR.[R]	1xTMT6plex [N-Term]; 1xOxidation [M8(100)]; 1xDeamidated [N10(100)]	0.000639127	0	1	4	4	767987709	767987709 [305-318]	0	1890.89	M8(Oxidation): 100; N10(Deamidated): 100	10.8	7.1	7.1	7.9	9.8	8	8.33333	8.56667	1.028	#N/A	Unique	2.25319	High	0	1.444e-05
FAM234A	83986	767987709	XP_011520993.1	389	Yes	Yes	13	NGT	TLAVAVE	GTGTDRQ	Yes	High	[R].YKPDTLAVAVENGTGTDR.[Q]	1xTMT6plex [K2]; 1xDeamidated [N12(100)]	3.17402e-05	0	1	4	3	767987709	767987709 [378-395]	0	2137.1	N12(Deamidated): 100	7.8	4.9	7.6	7.7	6.5	7.7	6.76667	7.3	1.07882	#N/A	Unique	3.01671	High	0	1.627e-06
FAM234A	83986	767987709	XP_011520993.1	389	Yes	Yes	13	NGT	TLAVAVE	GTGTDRQ	Yes	High	[R].YKPDTLAVAVENGTGTDR.[Q]	2xTMT6plex [N-Term; K2]; 1xDeamidated [N12(100)]	0.00147226	0	1	4	3	767987709	767987709 [378-395]	0	2366.26	N12(Deamidated): 100	23.3	12.2	14.9	21.2	17.9	13.3	16.8	17.4667	1.03968	#N/A	Unique	2.83371	High	0	4.681e-05
FAM234B	57613	62821776	NP_065904.1	237	Yes	Yes	7	NAT	HKMLSAF	ATSGKAI	No	High	[K].MLSAFNATSGK.[A]	1xTMT6plex [K11]; 1xOxidation [M1(100)]; 1xDeamidated [N6(100)]	0.000572376	0	1	2	3	62821776	62821776 [232-242]	0	1372.7	M1(Oxidation): 100; N6(Deamidated): 100	19.5	21.2	14.6	15.7	12.3	23.6	18.4333	17.2	0.933092	#N/A	Unique	3.10791	High	0	1.232e-05
FAP	2191	16933540	NP_004451.2	49	Yes	Yes	5	NGT	LTLKDIL	GTFSYKT	No	High	[K].DILNGTFSYK.[T]	2xTMT6plex [N-Term; K10]; 1xDeamidated [N4(100)]	3.29868e-06	0	1	5	3	16933540	16933540 [46-55]	0	1616.89	N4(Deamidated): 100	149	10.8	6.7	12.6	11.5	10.9	55.5	11.6667	0.21021	#N/A	Unique	3.26789	High	0	8.526e-09
FAP	2191	16933540	NP_004451.2	99	Yes	Yes	4	NAS	NRTMKSV	ASNYGLS	No	High	[K].SVNASNYGLSPDR.[Q]	1xTMT6plex [N-Term]; 1xDeamidated [N3(100)]	0.0246444	0	1	4	3	16933540	16933540 [97-109]	0	1609.8	N3(Deamidated): 100	78.2	11.2	10.3	13.5	11.8	14.1	33.2333	13.1333	0.395186	#N/A	Unique	1.6802	High	0.00601	0.09748
FAT1	2195	530377362	XP_005262891.1	2325	Yes	Yes	10	NHS	ISYQMFG	HSKSHDH	No	High	[R].GISYQMFGNHSK.[S]	2xTMT6plex [N-Term; K12]; 1xOxidation [M6(100)]; 1xDeamidated [N9(100)]	0.00941385	0	1	2	5	530377362	530377362 [2317-2328]	0	1843.94	M6(Oxidation): 100; N9(Deamidated): 100	16.1	26.5	24.3	17.5	19.8	19.3	22.3	18.8667	0.846039	#N/A	Unique	1.62754	High	0	0.001991
FAT1	2195	530377362	XP_005262891.1	3640	Yes	Yes	9	NHT	QVTQEML	HTIAIRF	No	High	[R].QVTQEMLNHTIAIR.[F]	1xTMT6plex [N-Term]; 1xOxidation [M6(100)]; 1xDeamidated [N8(100)]	0.00300806	0	1	2	3	530377362	530377362 [3633-3646]	0	1900.02	M6(Oxidation): 100; N8(Deamidated): 100	8.7	9.9	6	8.4	6.7	6.9	8.2	7.33333	0.894309	#N/A	Unique	1.97605	High	0	0.0001289
FAT1	2195	530377362	XP_005262891.1	3422	Yes	Yes	3	NTT	NGSPPRV	TTTVNID	No	High	[R].VNTTTVNIDVSDVNDNAPVFSR.[G]	1xTMT6plex [N-Term]; 2xDeamidated [N2(100); N7(100)]	0.101842	0.00222925	1	2	1	530377362	530377362 [3421-3442]	0	2608.29	N2(Deamidated): 100; N7(Deamidated): 99.99	12.8	7.8	7.1	17.9	7.9	13.6	9.23333	13.1333	1.42238	#N/A	Unique	1.36779	High	0.0005939	0.0198
FAT1	2195	530377362	XP_005262891.1	3422	Yes	Yes	3	NTT	NGSPPRV	TTTVNID	No	High	[R].VNTTTVNIDVSDVNDNAPVFSR.[G]	1xTMT6plex [N-Term]; 1xDeamidated [N2(100)]	0.00283986	0	1	2	3	530377362	530377362 [3421-3442]	0	2607.31	N2(Deamidated): 100	7.2	4.4	5.9	10.8	5.3	5.9	5.83333	7.33333	1.25714	#N/A	Unique	2.3428	High	0	0.0001185
FAT4	79633	767932609	XP_011530538.1	2939	Yes	Yes	4	NVT	KQILKYQ	VTGFSNV	No	High	[K].YQNVTGFSNVNINR.[H]	1xTMT6plex [N-Term]; 1xDeamidated [N3(100)]	0.0763374	0.00173548	1	4	1	767932609	767932609 [2937-2950]	0	1855.95	N3(Deamidated): 100	6.2		6.6	16.3	5.5	29.9	6.4	17.2333	2.69271	#N/A	Unique	1.37126	High	0.0004721	0.01293
FAT4	79633	767932609	XP_011530538.1	615	Yes	Yes	10	NGT	TDGDLGD	GTVRFSL	No	High	[R].ATDGDLGDNGTVR.[F]	1xTMT6plex [N-Term]; 1xDeamidated [N9(100)]	1.13184e-06	0	1	3	4	767932609	767932609 [607-619]	0	1520.74	N9(Deamidated): 100	21.5	9.8	19.9	60.2	17.4	69.1	17.0667	48.9	2.86523	#N/A	Unique	3.97116	High	0	1.88e-09
FAT4	79633	767932609	XP_011530538.1	2923	Yes	Yes	3	NAT	QSEYFRI	ATTGEIF	No	High	[R].INATTGEIFNK.[Q]	1xTMT6plex [K11]; 1xDeamidated [N2(100)]	0.00171644	0	1	4	3	767932609	767932609 [2922-2932]	0	1437.78	N2(Deamidated): 100	12	11.8	13.7	18.9	12.6	29.6	12.5	20.3667	1.62933	#N/A	Unique	2.12955	High	0	5.817e-05
FAT4	79633	767932609	XP_011530538.1	4269	Yes	Yes	15	NYT	IHIQESS	YTTVKIK	No	High	[R].SENGVLIHIQESSNYTTVK.[I]	2xTMT6plex [N-Term; K19]; 2xDeamidated [N3(100); N14]	0.0204849	0	1	4	2	767932609	767932609 [4256-4274]	0	2579.36	N3(Deamidated): 100; N14(Deamidated): 100	9.4	6.9	8.9	16.1	6.2	17	8.4	13.1	1.55952	#N/A	Unique	1.49946	High	0	0.001939
FGFR1	2260	767950666	XP_011542745.1	329	Yes	Yes	6	NGS	WLKHIEV	GSKIGPD	No	High	[K].HIEVNGSK.[I]	2xTMT6plex [N-Term; K8]; 1xDeamidated [N5(100)]	0.0677185	0.00117085	1	31	4	767950666	767950666 [325-332]	0	1342.77	N5(Deamidated): 100	8	4.5	7.3	16	7.2	13.7	6.6	12.3	1.86364	#N/A	Unique	2.26816	High	0.00663	0.1134
FGFRL1	53834	51988914	NP_001004358.1	293	Yes	Yes	3	NST	YGAEGRH	STIDVGG	No	High	[R].HNSTIDVGGQK.[F]	2xTMT6plex [N-Term; K11]; 1xDeamidated [N2(100)]	0.0806643	0.00222925	1	1	2	51988914	51988914 [292-302]	0	1614.89	N2(Deamidated): 100	8.8	7.5	7.7	7.3	7.7	5.4	8	6.8	0.85	#N/A	Unique	1.42003	High	0.0005939	0.014
FKBP10	60681	767995517	XP_011523401.1	393	Yes	Yes	11	NET	SRPSETC	ETTKLGD	Yes	High	[R].TLSRPSETCNETTK.[L]	1xCarbamidomethyl [C9]; 2xTMT6plex [N-Term; K14]; 1xDeamidated [N10(100)]	1.64542e-06	0	1	3	4	767995517	767995517 [384-397]	0	2083.07	N10(Deamidated): 100	19.4	6.5	80.8	7.7	94.2	117.5	35.5667	73.1333	2.05623	1.25	Unique	3.12728	High	0	6.989e-08
FKBP10	60681	767995517	XP_011523401.1	393	Yes	Yes	11	NET	SRPSETC	ETTKLGD	Yes	High	[R].TLSRPSETCNETTK.[L]	1xCarbamidomethyl [C9]; 1xTMT6plex [K14]; 1xDeamidated [N10(100)]	0.0106101	0	1	3	4	767995517	767995517 [384-397]	0	1853.91	N10(Deamidated): 100	8.3	6.2	12.6	4.6	15.9	12.6	9.03333	11.0333	1.2214	1.25	Unique	2.20569	High	0	0.0007605
FKBP10	60681	767995517	XP_011523401.1	294	Yes	Yes	5	NGS	DFMRYHY	GSLMDGT	Yes	High	[R].YHYNGSLMDGTLFDSSYSR.[N]	1xTMT6plex [N-Term]; 1xOxidation [M8(100)]; 1xDeamidated [N4(100)]	2.72517e-12	0	1	3	13	767995517	767995517 [291-309]	0	2459.1	N4(Deamidated): 100; M8(Oxidation): 100	37.9	18.3	60	26.4	61.1	71	38.7333	52.8333	1.36403	1.25	Unique	6.69239	High	0	7.738e-15
FKBP10	60681	767995517	XP_011523401.1	70	Yes	Yes	5	NGT	DFVRYHY	GTFEDGK	Yes	High	[R].YHYNGTFEDGK.[K]	2xTMT6plex [N-Term; K11]; 1xDeamidated [N4(100)]	0.000125738	0	1	2	9	767995517	767995517 [67-77]	0	1789.88	N4(Deamidated): 100	22.6	9.4	48.1	12.5	46.5	51.2	26.7	36.7333	1.37578	1.25	Unique	3.48377	High	0	6.345e-05
FKBP10	60681	767995517	XP_011523401.1	70	Yes	Yes	5	NGT	DFVRYHY	GTFEDGK	Yes	High	[R].YHYNGTFEDGK.[K]	1xTMT6plex [K11]; 1xDeamidated [N4(100)]	0.00200111	0	1	2	11	767995517	767995517 [67-77]	0	1560.72	N4(Deamidated): 100	24.8	14.2	44.3	19	53.9	60.1	27.7667	44.3333	1.59664	1.25	Unique	2.83372	High	0	7.215e-05
FKBP10	60681	767995517	XP_011523401.1	70	Yes	Yes	5	NGT	DFVRYHY	GTFEDGK	Yes	High	[R].YHYNGTFEDGKK.[F]	3xTMT6plex [N-Term; K11; K12]; 1xDeamidated [N4(100)]	0.00716445	0	1	2	7	767995517	767995517 [67-78]	1	2147.14	N4(Deamidated): 100	10.8	5.7	38.7	7	38.5	37.2	18.4	27.5667	1.49819	1.25	Unique	2.05276	High	0	0.000531
FKBP10	60681	767995517	XP_011523401.1	70	Yes	Yes	5	NGT	DFVRYHY	GTFEDGK	Yes	High	[R].YHYNGTFEDGKK.[F]	2xTMT6plex [K11; K12]; 1xDeamidated [N4(100)]	0.00104239	0	1	2	11	767995517	767995517 [67-78]	1	1917.97	N4(Deamidated): 100	30.4	23.9	71.3	14.6	98.7	87.6	41.8667	66.9667	1.59952	1.25	Unique	2.54678	High	0	0.0004846
FKBP10	60681	767995517	XP_011523401.1	182	Yes	Yes	5	NGT	DFVRYHY	GTLLDGT	Yes	High	[R].YHYNGTLLDGTSFDTSYSK.[G]	2xTMT6plex [N-Term; K19]; 1xDeamidated [N4(100)]	2.10299e-11	0	1	3	19	767995517	767995517 [179-197]	0	2628.29	N4(Deamidated): 100	48.4	27.9	132	42.6	110.6	148.1	69.4333	100.433	1.44647	1.25	Unique	7.59991	High	0	3.944e-16
FKBP10	60681	767995517	XP_011523401.1	182	Yes	Yes	5	NGT	DFVRYHY	GTLLDGT	Yes	High	[R].YHYNGTLLDGTSFDTSYSK.[G]	1xTMT6plex [K19]; 1xDeamidated [N4(100)]	4.27332e-05	0	1	3	15	767995517	767995517 [179-197]	0	2399.12	N4(Deamidated): 100	45.9	30.4	59.8	46.3	66.3	65.9	45.3667	59.5	1.31154	1.25	Unique	4.06115	High	0	3.171e-07
FKBP9	11328	547235570	NP_001271270.1	227	Yes	Yes	5	NGT	DFVRYHY	GTFLDGT	No	High	[R].YHYNGTFLDGTLFDSSHNR.[M]	1xTMT6plex [N-Term]; 1xDeamidated [N4(100)]	3.84988e-13	0	1	3	8	547235570	547235570 [224-242]	0	2474.16	N4(Deamidated): 100	11.8	10.3	9.6	14.8	10.4	11.6	10.5667	12.2667	1.16088	0.88	Unique	4.62758	High	0	1.387e-18
FKBP9	11328	547235570	NP_001271270.1	227	Yes	Yes	5	NGT	DFVRYHY	GTFLDGT	No	High	[R].YHYNGTFLDGTLFDSSHNR.[M]	1xTMT6plex [N-Term]; 2xDeamidated [N4(100); N18(100)]	0.0628912	0.000598249	1	3	1	547235570	547235570 [224-242]	0	2475.14	N4(Deamidated): 100; N18(Deamidated): 100	10.5	13.5	8.6	10.7	12	20	10.8667	14.2333	1.30982	0.88	Unique	1.06523	High	0.000164	0.00977
FKBP9	11328	547235570	NP_001271270.1	339	Yes	Yes	5	NGT	DFLRYHY	GTLLDGT	No	High	[R].YHYNGTLLDGTLFDSSYSR.[N]	1xTMT6plex [N-Term]; 1xDeamidated [N4(100)]	1.76125e-12	0	1	4	10	547235570	547235570 [336-354]	0	2439.17	N4(Deamidated): 100	28.3	26.7	25.9	29.5	24.5	26.5	26.9667	26.8333	0.995056	0.88	Unique	6.02018	High	0	1.184e-17
FN1	2335	530370039	XP_005246461.1	1007	Yes	Yes	12	NET	PTNLQFV	ETDSTVL	Yes	High	[K].LDAPTNLQFVNETDSTVLVR.[W]	1xTMT6plex [N-Term]; 1xDeamidated [N11(100)]	1.02876e-09	0	1	30	3	530370039	530370039 [997-1016]	0	2462.3	N11(Deamidated): 100	206.2	186.7	180.7	365.4	280.5	208.5	191.2	284.8	1.48954	#N/A	Unique	6.10715	High	0	2.805e-11
FN1	2335	530370039	XP_005246461.1	528	Yes	Yes	14	NDT	DDITYNV	DTFHKRH	Yes	High	[R].DQCIVDDITYNVNDTFHK.[R]	1xCarbamidomethyl [C3]; 2xTMT6plex [N-Term; K18]; 1xDeamidated [N13(99.8)]	1.30759e-09	0	1	31	6	530370039	530370039 [516-533]	0	2656.3	N13(Deamidated): 100	9	6.4	6.2	9.6	28.3	7.1	7.2	15	2.08333	#N/A	Unique	4.27286	High	0	1.343e-13
FN1	2335	530370039	XP_005246461.1	1007	Yes	Yes	24	NET	PTNLQFV	ETDSTVL	Yes	High	[R].ESKPLTAQQTTKLDAPTNLQFVNETDSTVLVR.[W]	3xTMT6plex [N-Term; K3; K12]; 1xDeamidated [N23(100)]	1.59178e-09	0	1	30	1	530370039	530370039 [985-1016]	1	4233.32	N23(Deamidated): 100	6.1	4.3		10.9	4	4.8	5.2	6.56667	1.26282	#N/A	Unique	4.72472	High	0	1.769e-13
FSTL1	11167	5901956	NP_009016.1	175	Yes	Yes	6	NET	FLKFVEQ	ETAINIT	Yes	High	[K].FVEQNETAINITTYPDQENNK.[L]	2xTMT6plex [N-Term; K21]; 2xDeamidated [N5(100); N19(99.8)]	2.21531e-06	0	1	1	2	5901956	5901956 [171-191]	0	2928.45	N5(Deamidated): 100; N19(Deamidated): 99.8	87	59.7	52.4	174.8	88.2	91.1	66.3667	118.033	1.7785	#N/A	Unique	4.24432	High	0	4.844e-09
FSTL1	11167	5901956	NP_009016.1	144	Yes	Yes	4	NYS	GWFSKGS	YSEILDK	Yes	High	[K].GSNYSEILDK.[Y]	2xTMT6plex [N-Term; K10]; 1xDeamidated [N3(100)]	0.00758856	0	1	1	3	5901956	5901956 [142-151]	0	1584.85	N3(Deamidated): 100	42.2	10.4	13.5	26.1	55	78	22.0333	53.0333	2.40696	#N/A	Unique	2.35454	High	0.001589	0.0402
FUCA2	2519	40068512	NP_114409.2	377	Yes	Yes	4	NDT	THTWRSQ	DTVTPDV	Yes	High	[R].SQNDTVTPDVWYTSKPK.[E]	3xTMT6plex [N-Term; K15; K17]; 1xDeamidated [N3(100)]	5.32918e-06	0	1	1	1	40068512	40068512 [375-391]	0	2654.43	N3(Deamidated): 100	19.3	20.4	14.5	19	14.6	16	18.0667	16.5333	0.915129	#N/A	Unique	2.89959	High	0	1.677e-08
FUT11	170384	145580617	NP_775811.2	318	Yes	No	7	NHS	VRDWMPN	HSVILID	No	High	[R].DWMPNNHSVILIDDFESPQK.[L]	2xTMT6plex [N-Term; K20]; 1xOxidation [M3(100)]; 1xDeamidated [N]	0.216963	0.00926046	1	3	2	145580617	145580617 [313-332]	0	2860.42	M3(Oxidation): 100; N5(Deamidated): 50; N6(Deamidated): 50	9.6	9.6	5.2	10.7	12.8	8.9	8.13333	10.8	1.32787	#N/A	Unique	1.00379	High	0.002989	0.06122
FUT11	170384	145580617	NP_775811.2	318	Yes	No	7	NHS	VRDWMPN	HSVILID	No	High	[R].DWMPNNHSVILIDDFESPQK.[L]	1xTMT6plex [K20]; 1xOxidation [M3(100)]; 1xDeamidated [N]	0.148024	0.00357109	1	3	4	145580617	145580617 [313-332]	0	2631.26	M3(Oxidation): 100; N5(Deamidated): 50; N6(Deamidated): 50	11.6	9.2	8.1	11.3	9.1	8.9	9.63333	9.76667	1.01384	#N/A	Unique	0.926214	High	0.001331	0.03438
GAA	2548	119393891	NP_000143.2	140	Yes	Yes	4	NLS	YPSYKLE	LSSSEMG	Yes	High	[K].LENLSSSEMGYTATLTR.[T]	1xTMT6plex [N-Term]; 1xOxidation [M9(100)]; 1xDeamidated [N3(100)]	1.33875e-06	0	1	1	5	119393891	119393891 [138-154]	0	2119.04	N3(Deamidated): 100; M9(Oxidation): 100	11.3	16.3	5	5.9	6	7.8	10.8667	6.56667	0.604294	#N/A	Unique	3.45698	High	0	1.231e-08
GAA	2548	119393891	NP_000143.2	470	Yes	Yes	7	NET	RRGVFIT	ETGQPLI	Yes	High	[R].GVFITNETGQPLIGK.[V]	2xTMT6plex [N-Term; K15]; 1xDeamidated [N6(100)]	2.73587e-06	0	1	1	7	119393891	119393891 [465-479]	0	2033.17	N6(Deamidated): 100	34.8	67.7	14.3	17.8	15	15.5	38.9333	16.1	0.413527	#N/A	Unique	3.99185	High	0	6.526e-09
GAA	2548	119393891	NP_000143.2	882	Yes	Yes	2	NNT	QVIFLAR	NTIVNEL	Yes	High	[R].NNTIVNELVR.[V]	1xTMT6plex [N-Term]; 1xDeamidated [N1(99.7)]	0.00116394	0	1	1	2	119393891	119393891 [882-891]	0	1401.79	N1(Deamidated): 99.83	36.6	53.5	16.1	19.5	10.8	23.8	35.4	18.0333	0.509416	#N/A	Unique	2.55204	High	0	3.352e-05
GAA	2548	119393891	NP_000143.2	390	Yes	Yes	6	NMT	ITRQVVE	MTRAHFP	Yes	High	[R].QVVENMTR.[A]	1xTMT6plex [N-Term]; 1xOxidation [M6(100)]; 1xDeamidated [N5(100)]	0.136605	0.00315632	1	1	4	119393891	119393891 [386-393]	0	1222.63	N5(Deamidated): 100; M6(Oxidation): 100	310.4	526.7	80.7	101.6	43.7	116.5	305.933	87.2667	0.285247	#N/A	Unique	2.32703	High	0.001833	0.04475
GAA	2548	119393891	NP_000143.2	470	Yes	Yes	8	NET	RRGVFIT	ETGQPLI	Yes	High	[R].RGVFITNETGQPLIGK.[V]	2xTMT6plex [N-Term; K16]; 1xDeamidated [N7(100)]	5.80881e-05	0	1	1	2	119393891	119393891 [464-479]	1	2189.27	N7(Deamidated): 100	21.8	15.3	8.9	10.3	8	12.5	15.3333	10.2667	0.669565	#N/A	Unique	2.61777	High	0	4.87e-07
GAA	2548	119393891	NP_000143.2	470	Yes	Yes	8	NET	RRGVFIT	ETGQPLI	Yes	High	[R].RGVFITNETGQPLIGK.[V]	1xTMT6plex [K16]; 1xDeamidated [N7(100)]	0.0103594	0	1	1	5	119393891	119393891 [464-479]	1	1960.11	N7(Deamidated): 100	11.5	17.1	6.5	8.2	6.5	7.8	11.7	7.5	0.641026	#N/A	Unique	2.84778	High	0	0.0007368
GABRA3	2556	4557603	NP_000799.1	63	Yes	Yes	13	NIT	IPDDSTD	ITIFTRI	No	High	[K].HAPDIPDDSTDNITIFTR.[I]	1xTMT6plex [N-Term]; 1xDeamidated [N12(100)]	0.00151523	0	1	2	3	4557603	4557603 [52-69]	0	2258.11	N12(Deamidated): 100	9.2	7	6.3	9.4	6.2	7.1	7.5	7.56667	1.00889	#N/A	Unique	2.52699	High	0	4.872e-05
GABRA3	2556	4557603	NP_000799.1	163	Yes	Yes	6	NMT	GKKSVAH	MTTPNKL	No	High	[K].SVAHNMTTPNK.[L]	2xTMT6plex [N-Term; K11]; 1xOxidation [M6(100)]; 1xDeamidated [N5(100)]	0.0705896	0.00117085	1	2	3	4557603	4557603 [159-169]	0	1674.89	N5(Deamidated): 100; M6(Oxidation): 100	8.1	5	8.4	19.4	8.4	12.6	7.16667	13.4667	1.87907	#N/A	Unique	1.14807	High	0.0003202	0.01152
GALNT3	2591	153266878	NP_004473.2	132	Yes	Yes	4	NLS	GKAFKTT	LSVEEQK	No	High	[K].TTNLSVEEQKEK.[E]	2xTMT6plex [K10; K12]; 1xDeamidated [N3(100)]	0.0270889	0	1	1	1	153266878	153266878 [130-141]	1	1865.03	N3(Deamidated): 100	9.7	38.7	7.2	5.8	11.6	10.1	18.5333	9.16667	0.494604	#N/A	Unique	1.96299	High	0	0.002897
GBA	2629	54607045	NP_001005741.1	119	Yes	Yes	13	NHT	SKVTTYC	ETMTGWV	No	High	[R-].MELSMGPIQANHTGTGLLLTLQPEQK.[F]	1xTMT6plex [K26]; 2xOxidation [M1(100); M5(100)]; 1xDeamidated [N11(100)]	0.101842	0.00222925	1	2	2	54607045	54607045 [88-113]	0	3069.58	M1(Oxidation): 100; M5(Oxidation): 100; N11(Deamidated): 100	8.1	5.7	7.7	9.9	8.2	9.3	7.16667	9.13333	1.27442	0.96	Unique	1.62321	High	0.0005939	0.01972
GBA	2629	54607045	NP_001005741.1	309	Yes	Yes	9	NST	DLGPTLA	STHHNVR	Yes	High	[R].DLGPTLANSTHHNVR.[L]	1xTMT6plex [N-Term]; 1xDeamidated [N8(100)]	8.17064e-09	0	1	3	21	54607045	54607045 [302-316]	0	1861.97	N8(Deamidated): 100	55.7	40.1	39.8	70.9	51.1	33.6	45.2	51.8667	1.14749	0.96	Unique	5.34261	High	0	6.647e-11
GBA	2629	54607045	NP_001005741.1	98	Yes	Yes	13	NHT	SMGPIQA	HTGTGLL	Yes	High	[R].RMELSMGPIQANHTGTGLLLTLQPEQK.[F]	2xTMT6plex [N-Term; K27]; 2xOxidation [M2(100); M6(100)]; 1xDeamidated [N12(100)]	0.00474369	0	1	1	7	54607045	54607045 [87-113]	1	3454.84	M2(Oxidation): 100; M6(Oxidation): 100; N12(Deamidated): 100	17.1	16.5	12.2	16.8	13.5	13.2	15.2667	14.5	0.949782	0.96	Unique	2.13694	High	0	0.005247
GBA	2629	54607045	NP_001005741.1	185	Yes	Yes	16	NFS	PDDFQLH	FSLPEED	Yes	High	[R].TYTYADTPDDFQLHNFSLPEEDTK.[L]	2xTMT6plex [N-Term; K24]; 1xDeamidated [N15(100)]	7.93767e-08	0	1	3	4	54607045	54607045 [171-194]	0	3306.57	N15(Deamidated): 100	22.2	14.9	16.2	15	17.2	14.2	17.7667	15.4667	0.870544	0.96	Unique	4.66917	High	0	4.397e-11
GBA	2629	54607045	NP_001005741.1	185	Yes	Yes	16	NFS	PDDFQLH	FSLPEED	Yes	High	[R].TYTYADTPDDFQLHNFSLPEEDTK.[L]	1xTMT6plex [K24]; 1xDeamidated [N15(100)]	0.00290877	0	1	3	5	54607045	54607045 [171-194]	0	3077.41	N15(Deamidated): 100	13.3	9.6	15.1	7.7	19.8	11.5	12.6667	13	1.02632	0.96	Unique	2.22037	High	0	0.001041
GDF15	9518	153792495	NP_004855.2	70	Yes	Yes	3	NQS	LLTRLRA	QSWEDSN	No	High	[R].ANQSWEDSNTDLVPAPAVR.[I]	1xTMT6plex [N-Term]; 1xDeamidated [N2(100)]	0.00626456	0	1	1	1	153792495	153792495 [69-87]	0	2300.14	N2(Deamidated): 100	12.2	9	10.5	10.2	10.3	12.9	10.5667	11.1333	1.05363	1.04	Unique	1.79467	High	0	0.000363
GDF15	9518	153792495	NP_004855.2	70	Yes	Yes	5	NQS	LLTRLRA	QSWEDSN	No	High	[R].LRANQSWEDSNTDLVPAPAVR.[I]	1xTMT6plex [N-Term]; 1xDeamidated [N4(100)]	0.00362662	0	1	1	3	153792495	153792495 [67-87]	1	2569.32	N4(Deamidated): 100	8.8	9.3	9.2	14.3	7.3	9.7	9.1	10.4333	1.14652	1.04	Unique	2.33572	High	0	0.0001677
GGT7	2686	109148539	NP_821158.2	523	Yes	Yes	4	NHS	SWPNRTA	HSAPSLE	Yes	High	[R].TANHSAPSLENSVQPGK.[R]	2xTMT6plex [N-Term; K17]; 2xDeamidated [N3(100); N11(100)]	0.00261754	0	1	5	1	109148539	109148539 [521-537]	0	2197.15	N3(Deamidated): 100; N11(Deamidated): 100	10.7	9.7	10.6	9.6	8.8	10.1	10.3333	9.5	0.919355	#N/A	Unique	1.36646	High	0	0.0001055
GGT7	2686	109148539	NP_821158.2	523	Yes	Yes	4	NHS	SWPNRTA	HSAPSLE	Yes	High	[R].TANHSAPSLENSVQPGK.[R]	2xTMT6plex [N-Term; K17]; 1xDeamidated [N3(100)]	4.23252e-05	0	1	5	3	109148539	109148539 [521-537]	0	2196.17	N3(Deamidated): 100	13.1	14.4	14.3	13	13.3	16.6	13.9333	14.3	1.02632	#N/A	Unique	3.02874	High	0	3.12e-07
GGT7	2686	109148539	NP_821158.2	523	Yes	Yes	4	NHS	SWPNRTA	HSAPSLE	Yes	High	[R].TANHSAPSLENSVQPGK.[R]	1xTMT6plex [K17]; 1xDeamidated [N3(100)]	0.0100662	0	1	5	4	109148539	109148539 [521-537]	0	1967	N3(Deamidated): 100	6.6	12.4	15	6.2	11.6	9.8	11.3333	9.2	0.811765	#N/A	Unique	2.26358	High	0	0.0007068
GINM1	116254	20302038	NP_620140.1	166	Yes	Yes	4	NYT	RGVLRHS	YTLPLEE	No	High	[R].HSNYTLPLEESMLYSISR.[D]	1xTMT6plex [N-Term]; 1xOxidation [M12(100)]; 1xDeamidated [N3(100)]	0.00312569	0	1	1	3	20302038	20302038 [164-181]	0	2386.18	N3(Deamidated): 100; M12(Oxidation): 100	9	7.1	6.6	11.5	6.8	9	7.56667	9.1	1.20264	#N/A	Unique	1.96698	High	0	0.0007541
GINM1	116254	20302038	NP_620140.1	46	Yes	Yes	3	NVT	PQDGIRI	VTTLKDD	No	High	[R].INVTTLKDDGDISK.[Q]	3xTMT6plex [N-Term; K7; K14]; 1xDeamidated [N2(100)]	0.00126888	0	1	1	1	20302038	20302038 [45-58]	1	2207.27	N2(Deamidated): 100	32.3	19.6	10.6	19.6	18.9	26.3	20.8333	21.6	1.0368	#N/A	Unique	1.6807	High	0	3.798e-05
GINM1	116254	20302038	NP_620140.1	46	Yes	Yes	3	NVT	PQDGIRI	VTTLKDD	No	High	[R].INVTTLKDDGDISK.[Q]	2xTMT6plex [K7; K14]; 1xDeamidated [N2(100)]	0.00323239	0	1	1	3	20302038	20302038 [45-58]	1	1978.11	N2(Deamidated): 100	14	11.3	7.3	9.1	11.1	18.1	10.8667	12.7667	1.17485	#N/A	Unique	1.96128	High	0	0.001585
GLA	2717	4504009	NP_000160.1	192	Yes	Yes	8	NRT	KHMSLAL	RTGRSIV	Yes	High	[K].HMSLALNR.[T]	1xTMT6plex [N-Term]; 1xOxidation [M2(100)]; 1xDeamidated [N7(100)]	0.0380196	0	1	1	3	4504009	4504009 [186-193]	0	1187.64	M2(Oxidation): 100; N7(Deamidated): 100	3.5	3.9	3.3		2.5		3.56667	2.5	0.700935	#DIV/0!	Unique	1.49614	High	0	0.004696
GLA	2717	4504009	NP_000160.1	139	Yes	Yes	10	NKT	GIYADVG	KTCAGFP	Yes	High	[K].LGIYADVGNK.[T]	2xTMT6plex [N-Term; K10]; 1xDeamidated [N9(100)]	0.0522376	0.000598249	1	1	1	4504009	4504009 [131-140]	0	1508.87	N9(Deamidated): 100	26.1	16	21	11	28.7	20.9	21.0333	20.2	0.96038	#DIV/0!	Unique	1.6284	High	0.000164	0.007442
GLA	2717	4504009	NP_000160.1	139	Yes	Yes	10	NKT	GIYADVG	KTCAGFP	Yes	High	[K].LGIYADVGNK.[T]	1xTMT6plex [K10]; 1xDeamidated [N9(100)]	0.1603	0.00357109	1	1	2	4504009	4504009 [131-140]	0	1279.71	N9(Deamidated): 100	15.1	16	9.8	25.3	12.8	13.9	13.6333	17.3333	1.27139	#DIV/0!	Unique	1.96902	High	0.001331	0.03871
GLB1	2720	950426350	NP_001303969.1	512	Yes	Yes	8	NIT	RNNVITL	ITGKAGA	No	High	[R].NNVITLNITGK.[A]	1xTMT6plex [K11]; 1xDeamidated [N7(100)]	0.000409148	0	1	4	8	950426350	950426350 [506-516]	0	1416.83	N7(Deamidated): 100	39.5	31.9	38.2	28.5	34.3	28.1	36.5333	30.3	0.82938	0.94	Unique	3.08424	High	0	3.229e-05
GLB1	2720	950426350	NP_001303969.1	512	Yes	Yes	8	NIT	RNNVITL	ITGKAGA	No	High	[R].NNVITLNITGK.[A]	1xTMT6plex [K11]; 2xDeamidated [N7(100); N]	0.000872908	0	1	4	13	950426350	950426350 [506-516]	0	1417.81	N1(Deamidated): 50; N2(Deamidated): 50; N7(Deamidated): 100	43.4	40.7	40	31.2	44.3	35.4	41.3667	36.9667	0.893634	0.94	Unique	2.69109	High	0	0.0002253
GLB1	2720	950426350	NP_001303969.1	512	Yes	Yes	8	NIT	RNNVITL	ITGKAGA	No	High	[R].NNVITLNITGK.[A]	2xTMT6plex [N-Term; K11]; 1xDeamidated [N7(100)]	1.08907e-05	0	1	4	6	950426350	950426350 [506-516]	0	1645.99	N7(Deamidated): 100	40.2	44.5	46.3	28.3	35.1	29.6	43.6667	31	0.709924	0.94	Unique	2.6365	High	0	1.822e-05
GLB1	2720	950426350	NP_001303969.1	512	Yes	Yes	8	NIT	RNNVITL	ITGKAGA	No	High	[R].NNVITLNITGK.[A]	2xTMT6plex [N-Term; K11]; 2xDeamidated [N1(99.9); N7(100)]	8.81695e-05	0	1	4	12	950426350	950426350 [506-516]	0	1646.97	N1(Deamidated): 99.87; N7(Deamidated): 100	56.1	48.7	52.6	41.4	54.8	36.6	52.4667	44.2667	0.84371	0.94	Unique	2.52602	High	0	8.773e-07
GLG1	2734	54633312	NP_036333.2	165	Yes	Yes	3	NLT	LLWNYKL	LTTDPKF	Yes	High	[K].LNLTTDPK.[F]	2xTMT6plex [N-Term; K8]; 1xDeamidated [N2(100)]	0.022738	0	1	3	3	54633312	54633312 [164-171]	0	1360.81	N2(Deamidated): 100	29.3	15.6	37.6	19.6	50	20	27.5	29.8667	1.08606	1.12	Unique	2.19451	High	0	0.002253
GLG1	2734	54633312	NP_036333.2	677	Yes	Yes	6	NLT	ECRDIVG	LTELESE	Yes	High	[R].DIVGNLTELESEDIQIEALLMR.[A]	1xTMT6plex [N-Term]; 1xOxidation [M21(100)]; 1xDeamidated [N5(100)]	0.0680319	0.00117085	1	3	1	54633312	54633312 [673-694]	0	2747.42	N5(Deamidated): 100; M21(Oxidation): 100	44.7	47.8	47.6	53.5	56.3	51.8	46.7	53.8667	1.15346	1.12	Unique	2.01536	High	0.0003202	0.01095
GLG1	2734	54633312	NP_036333.2	210	Yes	Yes	3	NIT	CLVDHRG	ITEYQCH	Yes	High	[R].GNITEYQCHQYITK.[M]	1xCarbamidomethyl [C8]; 2xTMT6plex [N-Term; K14]; 1xDeamidated [N2(100)]	0.000273473	0	1	3	4	54633312	54633312 [209-222]	0	2214.13	N2(Deamidated): 100	19.6	19.5	21	12.5	29	15.7	20.0333	19.0667	0.951747	1.12	Unique	3.09805	High	0	4.353e-06
GLMP	112770	24307871	NP_653181.1	187	Yes	Yes	5	NGS	DPTRTFA	GSLAFRV	No	High	[R].TFANGSLAFR.[V]	1xTMT6plex [N-Term]; 1xDeamidated [N4(100)]	0.0294912	0	1	7	3	24307871	24307871 [184-193]	0	1313.71	N4(Deamidated): 100	28.1	16.1	6.5	30.4	18.5	17.7	16.9	22.2	1.31361	#N/A	Unique	2.2343	High	0	0.003272
GLT8D1	55830	1034634556	XP_016862347.1	257	Yes	Yes	4	NIT	LTEWKRQ	ITNQLEK	Yes	High	[K].RQNITNQLEK.[W]	1xTMT6plex [K10]; 1xDeamidated [N3(100)]	0.131795	0.00315632	1	1	4	1034634556	1034634556 [255-264]	1	1473.82	N3(Deamidated): 100	7.6	5	6.5	5.9	6.2	10.4	6.36667	7.5	1.17801	#DIV/0!	Unique	1.9989	High	0.00084	0.02895
GLT8D1	55830	1034634556	XP_016862347.1	257	Yes	Yes	3	NIT	LTEWKRQ	ITNQLEK	Yes	High	[R].QNITNQLEK.[W]	2xTMT6plex [N-Term; K9]; 1xDeamidated [N2(100)]	0.000433387	0	1	1	4	1034634556	1034634556 [256-264]	0	1546.88	N2(Deamidated): 100	35.8	18.4	25.7	28.5	28.9	39.3	26.6333	32.2333	1.21026	#DIV/0!	Unique	3.29112	High	0	8.335e-06
GLT8D1	55830	1034634556	XP_016862347.1	257	Yes	Yes	3	NIT	LTEWKRQ	ITNQLEK	Yes	High	[R].QNITNQLEK.[W]	1xTMT6plex [K9]; 1xDeamidated [N2(100)]	0.12154	0.00315632	1	1	2	1034634556	1034634556 [256-264]	0	1317.72	N2(Deamidated): 100	28.5	23.1	23.5	40.6	28.2	27.7	25.0333	32.1667	1.28495	#DIV/0!	Unique	2.10592	High	0.004937	0.08714
GNPTAB	79158	38202211	NP_077288.2	759	Yes	Yes	13	NDS	AIITDET	DSLVAPQ	No	High	[K].IKNQAIITDETNDSLVAPQEK.[Q]	3xTMT6plex [N-Term; K2; K21]; 1xDeamidated [N12(100)]	2.52125e-05	0	1	5	2	38202211	38202211 [748-768]	1	3015.68	N12(Deamidated): 100	13.8	10.3	5.6	13.2	4.3		9.9	8.75	0.883838	#N/A	Unique	1.9727	High	0	4.241e-07
GNPTAB	79158	38202211	NP_077288.2	759	Yes	No	13	NDS	AIITDET	DSLVAPQ	No	High	[K].IKNQAIITDETNDSLVAPQEK.[Q]	2xTMT6plex [K2; K21]; 1xDeamidated [N12(99.5)]	0.0464931	0.000598249	1	5	3	38202211	38202211 [748-768]	1	2786.52	N3(Deamidated): 50; N12(Deamidated): 50	11	5.6	7	12.5	5.8	4.6	7.86667	7.63333	0.970339	#N/A	Unique	1.68637	High	0.000164	0.006279
GNPTAB	79158	38202211	NP_077288.2	175	Yes	No	2	NPS	FNVAKPK	PSTNVSV	No	High	[K].NPSTNVSVVVFDSTK.[D]	2xTMT6plex [N-Term; K15]; 1xDeamidated [N]	0.00331082	0	1	4	2	38202211	38202211 [175-189]	0	2053.12	N1(Deamidated): 50; N5(Deamidated): 50	8.1	5.6	7.8	7.2	9.6	6.5	7.16667	7.76667	1.08372	#N/A	Unique	2.01255	High	0	0.0001476
GNPTAB	79158	38202211	NP_077288.2	175	Yes	No	2	NPS	FNVAKPK	PSTNVSV	No	High	[K].NPSTNVSVVVFDSTK.[D]	1xTMT6plex [K15]; 1xDeamidated [N5(99.4)]	0.136605	0.00315632	1	4	1	38202211	38202211 [175-189]	0	1823.96	N1(Deamidated): 50; N5(Deamidated): 50	5.8	7.8	5.2	15	6.8	8	6.26667	9.93333	1.58511	#N/A	Unique	1.58688	High	0.0009713	0.0304
GNPTAB	79158	38202211	NP_077288.2	759	Yes	Yes	11	NDS	AIITDET	DSLVAPQ	No	High	[K].NQAIITDETNDSLVAPQEK.[Q]	1xTMT6plex [K19]; 1xDeamidated [N10(100)]	0.00762501	0	1	5	1	38202211	38202211 [750-768]	0	2316.18	N10(Deamidated): 100	8.3	10.8	10.5	9	7.5	10.6	9.86667	9.03333	0.915541	#N/A	Unique	1.68333	High	0	0.0004795
GNPTAB	79158	38202211	NP_077288.2	551	Yes	Yes	7	NQT	YKVILLP	QTHYIIP	No	High	[K].VILLPNQTHYIIPK.[G]	2xTMT6plex [N-Term; K14]; 1xDeamidated [N6(100)]	5.45766e-05	0	1	5	2	38202211	38202211 [546-559]	0	2108.29	N6(Deamidated): 100	8	11.2	5.9	12.7	7.3	6.3	8.36667	8.76667	1.04781	#N/A	Unique	2.71656	High	0	5.303e-07
GNPTAB	79158	38202211	NP_077288.2	642	Yes	Yes	7	NST	TREGPKL	STAQKGY	No	High	[R].EGPKLNSTAQK.[G]	2xTMT6plex [K4; K11]; 1xDeamidated [N6(100)]	0.102774	0.00222925	1	5	2	38202211	38202211 [637-647]	1	1631.94	N6(Deamidated): 100	8.6	16.1	6.5	11.2	6.8	7.4	10.4	8.46667	0.814103	#N/A	Unique	1.35775	High	0.00277	0.05734
GNPTAB	79158	38202211	NP_077288.2	684	Yes	Yes	5	NST	KFKRHDV	STRRAQE	No	High	[R].HDVNSTR.[R]	1xTMT6plex [N-Term]; 1xDeamidated [N4(100)]	0.103713	0.00222925	1	5	3	38202211	38202211 [681-687]	0	1058.54	N4(Deamidated): 100		4.1		2.8	2.4		4.1	2.6	0.634146	#N/A	Unique	1.41065	High	0.0005939	0.02031
GNPTAB	79158	38202211	NP_077288.2	1129	Yes	Yes	3	NVS	AFKMIRT	VSHVVGQ	Yes	High	[R].TNVSHVVGQLDDIR.[K]	1xTMT6plex [N-Term]; 1xDeamidated [N2(100)]	0.00155946	0	1	5	1	38202211	38202211 [1128-1141]	0	1782.95	N2(Deamidated): 100	5	3.9		3.6		6.8	4.45	5.2	1.16854	#N/A	Unique	1.95764	High	0	5.093e-05
GNS	2799	4504061	NP_002067.1	279	Yes	Yes	6	NSS	QAKTPMT	SSIQFLD	Yes	High	[K].TPMTNSSIQFLDNAFR.[K]	1xTMT6plex [N-Term]; 1xOxidation [M3(100)]; 2xDeamidated [N5(100); N13(100)]	1.19891e-06	0	1	1	6	4504061	4504061 [275-290]	0	2089.01	M3(Oxidation): 100; N5(Deamidated): 100; N13(Deamidated): 100	9.8	5.9	10.1	10.8	8.8	10.4	8.6	10	1.16279	1.01	Unique	3.30577	High	0	1.429e-08
GNS	2799	4504061	NP_002067.1	279	Yes	Yes	6	NSS	QAKTPMT	SSIQFLD	Yes	High	[K].TPMTNSSIQFLDNAFR.[K]	1xTMT6plex [N-Term]; 1xOxidation [M3(100)]; 1xDeamidated [N5(100)]	1.53119e-06	0	1	1	6	4504061	4504061 [275-290]	0	2088.03	M3(Oxidation): 100; N5(Deamidated): 100	86.2	73.5	114	120.1	75.2	57.7	91.2333	84.3333	0.92437	1.01	Unique	3.65888	High	0	1.767e-08
GNS	2799	4504061	NP_002067.1	183	Yes	Yes	4	NYT	EKNSKYY	YTLSING	Yes	High	[K].YYNYTLSINGK.[A]	2xTMT6plex [N-Term; K11]; 2xDeamidated [N3(100); N9(100)]	1.32577e-05	0	1	1	12	4504061	4504061 [181-191]	0	1795.95	N3(Deamidated): 100; N9(Deamidated): 100	69.8	54.2	93.7	62.1	67.4	41.8	72.5667	57.1	0.786863	1.01	Unique	3.03468	High	0	6.064e-08
GNS	2799	4504061	NP_002067.1	183	Yes	Yes	4	NYT	EKNSKYY	YTLSING	Yes	High	[K].YYNYTLSINGK.[A]	1xTMT6plex [K11]; 2xDeamidated [N3(100); N9(100)]	0.00863647	0	1	1	13	4504061	4504061 [181-191]	0	1566.79	N3(Deamidated): 100; N9(Deamidated): 100	51.1	39.8	64.3	46.2	53.3	39.9	51.7333	46.4667	0.898196	1.01	Unique	2.55074	High	0	0.0005707
GNS	2799	4504061	NP_002067.1	183	Yes	Yes	4	NYT	EKNSKYY	YTLSING	Yes	High	[K].YYNYTLSINGK.[A]	1xTMT6plex [K11]; 1xDeamidated [N3(100)]	0.106581	0.00274374	1	1	1	4504061	4504061 [181-191]	0	1565.8	N3(Deamidated): 100	9.9	11.4	13.5	7.5	15.8	11.2	11.6	11.5	0.991379	1.01	Unique	1.58995	High	0.0007256	0.02113
GNS	2799	4504061	NP_002067.1	405	Yes	Yes	5	NLT	PILRGAS	LTWRSDV	Yes	High	[R].GASNLTWR.[S]	1xTMT6plex [N-Term]; 1xDeamidated [N4(100)]	0.0238411	0	1	1	2	4504061	4504061 [402-409]	0	1134.61	N4(Deamidated): 100	48.3	41	64.5	56	41.6	23.9	51.2667	40.5	0.789987	1.01	Unique	2.56626	High	0	0.002412
GNS	2799	4504061	NP_002067.1	362	Yes	Yes	8	NQT	RGPGIKP	QTSKMLV	Yes	High	[R].GPGIKPNQTSK.[M]	3xTMT6plex [N-Term; K5; K11]; 1xDeamidated [N7(100)]	0.000242572	0	1	1	11	4504061	4504061 [356-366]	0	1815.09	N7(Deamidated): 100	112.4	90.9	162.3	136.6	100.1	55	121.867	97.2333	0.797867	1.01	Unique	2.02138	High	0	3.268e-05
GNS	2799	4504061	NP_002067.1	362	Yes	Yes	8	NQT	RGPGIKP	QTSKMLV	Yes	High	[R].GPGIKPNQTSK.[M]	2xTMT6plex [K5; K11]; 1xDeamidated [N7(100)]	0.00762501	0	1	1	4	4504061	4504061 [356-366]	0	1585.93	N7(Deamidated): 100	10.3	9.5	10.9	13	5	8.7	10.2333	8.9	0.869707	1.01	Unique	2.19754	High	0	0.0004777
GOLIM4	27333	530374430	XP_005247421.1	257	Yes	Yes	10	NVT	PDPAEQQ	VTQVAHS	Yes	High	[R].KPDPAEQQNVTQVAHSPQGYNTAR.[E]	2xTMT6plex [K1; N-Term]; 1xDeamidated [N9(100)]	1.46649e-06	0	1	5	3	530374430	530374430 [249-272]	0	3095.59	N9(Deamidated): 100	11.8	13.4	9.5	8.7	8	17.8	11.5667	11.5	0.994236	1.04	Unique	4.17626	High	0	2.716e-09
GOLIM4	27333	530374430	XP_005247421.1	257	Yes	Yes	10	NVT	PDPAEQQ	VTQVAHS	Yes	High	[R].KPDPAEQQNVTQVAHSPQGYNTAR.[E]	2xTMT6plex [K1; N-Term]; 2xDeamidated [N9(100); N21(100)]	0.00635531	0	1	5	3	530374430	530374430 [249-272]	0	3096.58	N9(Deamidated): 100; N21(Deamidated): 100	10.1	4	9.5	10.3	5.6	12.7	7.86667	9.53333	1.21186	1.04	Unique	2.28267	High	0	0.000369
GOLM1	51280	29550850	NP_808800.1	109	Yes	Yes	7	NIT	EKAVLVN	ITTGERL	Yes	High	[K].AVLVNNITTGER.[L]	1xTMT6plex [N-Term]; 2xDeamidated [N5(100); N6(100)]	0.000106817	0	1	1	6	29550850	29550850 [104-115]	0	1517.84	N5(Deamidated): 100; N6(Deamidated): 100	28.3	29.6	31.4	25.9	28.7	36.8	29.7667	30.4667	1.02352	#N/A	Unique	3.16363	High	0	0.0001447
GOLM1	51280	29550850	NP_808800.1	109	Yes	Yes	7	NIT	EKAVLVN	ITTGERL	Yes	High	[K].AVLVNNITTGER.[L]	1xTMT6plex [N-Term]; 1xDeamidated [N]	1.28835e-06	0	1	1	18	29550850	29550850 [104-115]	0	1516.85	N6(Deamidated): 100	69.8	67.7	71.6	63.8	59.3	68.4	69.7	63.8333	0.91583	#N/A	Unique	4.02638	High	0	2.257e-09
GOLM1	51280	29550850	NP_808800.1	144	Yes	Yes	12	NQT	DVLQFQK	QTNLERK	Yes	High	[R].LQQDVLQFQKNQTNLER.[K]	1xTMT6plex [K10]; 1xDeamidated [N11(99.4)]	0.00399163	0	1	1	1	29550850	29550850 [134-150]	1	2332.25	N11(Deamidated): 99.68	10.2	11.5	16.6	14.7	16.5	12.3	12.7667	14.5	1.13577	#N/A	Unique	2.36732	High	0	0.0001913
GOLM1	51280	29550850	NP_808800.1	144	Yes	Yes	12	NQT	DVLQFQK	QTNLERK	Yes	High	[R].LQQDVLQFQKNQTNLER.[K]	2xTMT6plex [N-Term; K10]; 1xDeamidated [N11(100)]	3.63559e-15	0	1	1	9	29550850	29550850 [134-150]	1	2561.41	N11(Deamidated): 100	70.7	70.6	60.1	68.7	55.1	66.7	67.1333	63.5	0.945879	#N/A	Unique	5.39158	High	0	1.919e-21
GPC1	2817	167001141	NP_002072.2	116	Yes	Yes	12	NDS	DHFQHLL	DSERTLQ	Yes	High	[R].SFDDHFQHLLNDSER.[T]	1xTMT6plex [N-Term]; 1xDeamidated [N11(100)]	4.31519e-06	0	1	2	5	167001141	167001141 [106-120]	0	2089.98	N11(Deamidated): 100	6.4	15	7.9	8.6	6.9	5.8	9.76667	7.1	0.726962	1.16	Unique	3.45184	High	0	1.242e-08
GPR107	57720	211971058	NP_001130029.1	169	Yes	Yes	18	NQT	VNPASAG	QTQKTQD	Yes	High	[K].VLGQSQEPNVNPASAGNQTQK.[T]	2xTMT6plex [N-Term; K21]; 2xDeamidated [N]	0.0255951	0	1	5	2	211971058	211971058 [153-173]	0	2627.37	N9(Deamidated): 50; N11(Deamidated): 50; N17(Deamidated): 100	13.6	12.9	9.9	8.3	11.1	9.1	12.1333	9.5	0.782967	#N/A	Unique	1.65962	High	0	0.002666
GPR107	57720	211971058	NP_001130029.1	169	Yes	Yes	18	NQT	VNPASAG	QTQKTQD	Yes	High	[K].VLGQSQEPNVNPASAGNQTQK.[T]	2xTMT6plex [N-Term; K21]; 1xDeamidated [N17(100)]	4.4645e-09	0	1	5	16	211971058	211971058 [153-173]	0	2626.38	N17(Deamidated): 100	41.5	24.3	21.3	23.8	33	29.5	29.0333	28.7667	0.990815	#N/A	Unique	4.41318	High	0	8.321e-12
GPR107	57720	211971058	NP_001130029.1	169	Yes	Yes	18	NQT	VNPASAG	QTQKTQD	Yes	High	[K].VLGQSQEPNVNPASAGNQTQK.[T]	1xTMT6plex [K21]; 1xDeamidated [N17(100)]	9.98987e-06	0	1	5	9	211971058	211971058 [153-173]	0	2397.22	N17(Deamidated): 100	55.2	25.8	27.5	28.9	46.4	26.4	36.1667	33.9	0.937327	#N/A	Unique	4.672	High	0	4.064e-08
GRN	2896	530411988	XP_005257310.1	265	Yes	Yes	3	NAT	SKCLSKE	ATTDLLT	No	High	[K].ENATTDLLTK.[L]	2xTMT6plex [N-Term; K10]; 1xDeamidated [N2(100)]	0.00923529	0	1	1	4	530411988	530411988 [264-273]	0	1564.88	N2(Deamidated): 100	22.4	16	29.5	16.6	39.3	16.3	22.6333	24.0667	1.06333	0.85	Unique	2.38804	High	0.0003202	0.01096
GRN	2896	530411988	XP_005257310.1	265	Yes	Yes	3	NAT	SKCLSKE	ATTDLLT	No	High	[K].ENATTDLLTK.[L]	1xTMT6plex [K10]; 1xDeamidated [N2(100)]	0.0763374	0.00173548	1	1	4	530411988	530411988 [264-273]	0	1335.72	N2(Deamidated): 100	24.4	25	21.8	18.6	33.7	24.1	23.7333	25.4667	1.07303	0.85	Unique	2.51014	High	0.0005939	0.01721
GRN	2896	530411988	XP_005257310.1	265	Yes	Yes	3	NAT	SKCLSKE	ATTDLLT	No	High	[K].ENATTDLLTKLPAHTVGDVK.[C]	3xTMT6plex [N-Term; K10; K20]; 1xDeamidated [N2(100)]	0.00901683	0	1	1	1	530411988	530411988 [264-283]	1	2811.61	N2(Deamidated): 100	7.7	5.8	5.4	10.4	5.9	4.8	6.3	7.03333	1.1164	0.85	Unique	2.06989	High	0	0.0006042
GUSB	2990	268834192	NP_000172.2	272	Yes	Yes	5	NGT	AENKVVA	GTGTQGQ	Yes	High	[K].VVANGTGTQGQLK.[V]	1xTMT6plex [K13]; 1xDeamidated [N4(100)]	0.00013642	0	1	9	4	268834192	268834192 [269-281]	0	1502.84	N4(Deamidated): 100	16.8	41.1	53.5	11.4	37.1	27	37.1333	25.1667	0.677738	0.83	Unique	3.79159	High	0	9.542e-06
GUSB	2990	268834192	NP_000172.2	272	Yes	Yes	5	NGT	AENKVVA	GTGTQGQ	Yes	High	[K].VVANGTGTQGQLK.[V]	2xTMT6plex [N-Term; K13]; 1xDeamidated [N4(100)]	3.99873e-10	0	1	9	7	268834192	268834192 [269-281]	0	1732	N4(Deamidated): 100	46.4	117.9	129.3	25.2	82.4	102.6	97.8667	70.0667	0.71594	0.83	Unique	5.07519	High	0	2.517e-14
GUSB	2990	268834192	NP_000172.2	272	Yes	Yes	12	NGT	AENKVVA	GTGTQGQ	Yes	High	[R].LLDAENKVVANGTGTQGQLK.[V]	3xTMT6plex [N-Term; K7; K20]; 1xDeamidated [N]	0.048261	0.000598249	1	9	2	268834192	268834192 [262-281]	1	2744.58	N11(Deamidated): 99.55	8.4	19.4	26.3	11.4	12.4	11.2	18.0333	11.6667	0.64695	0.83	Unique	1.74945	High	0.000164	0.006651
GXYLT1	283464	153791362	NP_775872.1	237	Yes	Yes	3	NST	WSLLKKF	STQIAAM	Yes	High	[K].FNSTQIAAMAPEHEEPR.[I]	1xTMT6plex [N-Term]; 1xOxidation [M9(100)]; 1xDeamidated [N2(100)]	0.0296306	0	1	3	1	153791362	153791362 [236-252]	0	2174.04	N2(Deamidated): 100; M9(Oxidation): 100	5.3	4.4	6.8	7.4	6.2	7.2	5.5	6.93333	1.26061	#N/A	Unique	1.20994	High	0	0.0033
GXYLT1	283464	153791362	NP_775872.1	237	Yes	Yes	4	NST	WSLLKKF	STQIAAM	Yes	High	[K].KFNSTQIAAMAPEHEEPR.[I]	2xTMT6plex [K1; N-Term]; 1xOxidation [M10(100)]; 1xDeamidated [N3(100)]	1.93689e-06	0	1	3	8	153791362	153791362 [235-252]	1	2531.3	N3(Deamidated): 100; M10(Oxidation): 100	16.1	14.6	12.4	18.6	11.1	29.5	14.3667	19.7333	1.37355	#N/A	Unique	3.27101	High	0	4.01e-09
GXYLT1	283464	153791362	NP_775872.1	237	Yes	Yes	4	NST	WSLLKKF	STQIAAM	Yes	High	[K].KFNSTQIAAMAPEHEEPR.[I]	1xTMT6plex [K1]; 1xOxidation [M10(100)]; 1xDeamidated [N3(100)]	0.000135118	0	1	3	5	153791362	153791362 [235-252]	1	2302.13	N3(Deamidated): 100; M10(Oxidation): 100	11.4	10.3	10.3	12	8.9	19.1	10.6667	13.3333	1.25	#N/A	Unique	2.589	High	0	1.607e-06
HEG1	57493	530375053	XP_005247723.1	1180	Yes	Yes	5	NTT	KLKRTFL	TTVEKHS	No	High	[R].TFLNTTVEK.[H]	2xTMT6plex [N-Term; K9]; 1xDeamidated [N4(100)]	0.00271991	0	1	2	2	530375053	530375053 [1177-1185]	0	1511.87	N4(Deamidated): 100	20.3	23.8	18.7	23.3	20.4	60.4	20.9333	34.7	1.65764	#N/A	Unique	2.19733	High	0	0.0001113
HEG1	57493	530375053	XP_005247723.1	1180	Yes	Yes	5	NTT	KLKRTFL	TTVEKHS	No	High	[R].TFLNTTVEK.[H]	1xTMT6plex [K9]; 1xDeamidated [N4(100)]	0.0415596	0	1	2	4	530375053	530375053 [1177-1185]	0	1282.71	N4(Deamidated): 100	8.6	10.9	12.4	13.3	11.5	24.5	10.6333	16.4333	1.54545	#N/A	Unique	2.3228	High	0	0.005343
HEXA	3073	974005364	NP_001305754.1	168	Yes	Yes	10	NKT	AEGTFFI	KTEIEDF	No	High	[K].SAEGTFFINK.[T]	1xTMT6plex [K10]; 1xDeamidated [N9(100)]	0.122089	0.00315632	1	2	2	974005364	974005364 [160-169]	0	1343.7	N9(Deamidated): 100	12	11.5	14.2	11.3	16.3	12	12.5667	13.2	1.0504	1.06	Unique	1.79056	High	0.002187	0.04934
HEXA	3073	974005364	NP_001305754.1	168	Yes	Yes	10	NKT	AEGTFFI	KTEIEDF	No	High	[K].SAEGTFFINKTEIEDFPR.[F]	2xTMT6plex [N-Term; K10]; 1xDeamidated [N9(100)]	8.53358e-11	0	1	2	6	974005364	974005364 [160-177]	1	2560.33	N9(Deamidated): 100	305.3	147.8	324	114.1	361	208.8	259.033	227.967	0.880067	1.06	Unique	5.09613	High	0	2.851e-15
HEXA	3073	974005364	NP_001305754.1	168	Yes	Yes	10	NKT	AEGTFFI	KTEIEDF	No	High	[K].SAEGTFFINKTEIEDFPR.[F]	1xTMT6plex [K10]; 1xDeamidated [N9(100)]	1.07883e-06	0	1	2	7	974005364	974005364 [160-177]	1	2331.17	N9(Deamidated): 100	29.6	22.2	35.4	18.3	40	20.6	29.0667	26.3	0.904817	1.06	Unique	4.07368	High	0	1.758e-09
HFE	3077	4504377	NP_000401.1	234	Yes	Yes	9	NIT	ALNYYPQ	ITMKWLK	Yes	High	[R].ALNYYPQNITMK.[W]	2xTMT6plex [N-Term; K12]; 1xOxidation [M11(100)]; 1xDeamidated [N8(100)]	0.00216069	0	1	10	7	4504377	4504377 [227-238]	0	1931.03	N8(Deamidated): 100; M11(Oxidation): 100	18.4	26.7	13.4	28.6	15	20.9	19.5	21.5	1.10256	#N/A	Unique	2.12268	High	0	8.034e-05
HGSNAT	138050	530387583	XP_005273466.1	114	Yes	Yes	23	NDT	HGSILQL	DTLEEKE	No	High	[K].AGKPSAAAASVSTQHGSILQLNDTLEEK.[E]	2xTMT6plex [K3; K28]; 1xDeamidated [N22(100)]	0.0289399	0	1	6	2	530387583	530387583 [93-120]	0	3282.76	N22(Deamidated): 100	5.6	10.7	3.5	21.9	5	5.3	6.6	10.7333	1.62626	#N/A	Unique	1.74064	High	0	0.003186
HLA-A	3105	530429121	XP_005275388.1	107	Yes	Yes	5	NQS	GTLRGYY	QSEAGSH	No	High	[R].GYYNQSEAGSHTVQR.[M]	1xTMT6plex [N-Term]; 1xDeamidated [N4(100)]	4.98597e-10	0	1	2	29	530429121	530429121 [104-118]	0	1926.91	N4(Deamidated): 100	52	53	39.4	662.6	35	148.6	48.1333	282.067	5.86011	1.77	Unique	6.57073	High	0	7.121e-11
HLA-A	3105	337752170	NP_001229687.1	110	Yes	Yes	5	NQS	GTLRGYY	QSEDGSH	No	High	[R].GYYNQSEDGSHTIQIMYGCDVGPDGR.[F]	1xCarbamidomethyl [C19]; 1xTMT6plex [N-Term]; 1xOxidation [M16(100)]; 1xDeamidated [N4(100)]	4.95842e-05	0	1	1	3	337752170	337752170 [107-132]	0	3165.37	N4(Deamidated): 100; M16(Oxidation): 100	9.5	4.8	6.8	8	11.7	11.6	7.03333	10.4333	1.48341	1.52	Unique	2.7414	High	0	3.905e-07
HLA-B	3106	17986001	NP_005505.2	110	Yes	Yes	5	NQS	RNLRGYY	QSEAGSH	No	High	[R].GYYNQSEAGSHTLQSMYGCDVGPDGR.[L]	1xCarbamidomethyl [C19]; 1xTMT6plex [N-Term]; 1xOxidation [M16(100)]; 1xDeamidated [N4(100)]	5.51026e-05	0	1	2	5	17986001	17986001 [107-132]	0	3095.33	N4(Deamidated): 100; M16(Oxidation): 100	16.2	5.8	5.6	5.6	4.7	6.6	9.2	5.63333	0.612319	1.17	Unique	3.00331	High	0	4.522e-07
HLA-C	3107	339882741	NP_001229971.1	110	Yes	Yes	5	NQS	RNLRGYY	QSEDGSH	Yes	High	[R].GYYNQSEDGSHTLQR.[M]	1xTMT6plex [N-Term]; 1xDeamidated [N4(100)]	9.71213e-10	0	1	2	13	339882741	339882741 [107-121]	0	1984.92	N4(Deamidated): 100	46.8	57.6	21.8	21.2	25.5	44.6	42.0667	30.4333	0.723455	0.86	Unique	5.01915	High	0	8.786e-14
HLA-C	3107	339882741	NP_001229971.1	110	Yes	Yes	5	NQS	RNLRGYY	QSEDGSH	Yes	High	[R].GYYNQSEDGSHTLQRMYGCDLGPDGR.[L]	1xCarbamidomethyl [C19]; 1xTMT6plex [N-Term]; 1xOxidation [M16(100)]; 1xDeamidated [N4(100)]	0.00706217	0	1	1	3	339882741	339882741 [107-132]	1	3222.41	N4(Deamidated): 100; M16(Oxidation): 100		3.6	4.9	5	6.5	3.8	4.25	5.1	1.2	0.86	Unique	2.10623	High	0	0.0004297
HNRNPH1	3187	530381015	XP_005265952.1	362	Yes	Yes	8	NST	RYVELFL	STAGASG	No	High	[R].YVELFLNSTAGASGGAYEHR.[Y]	1xTMT6plex [N-Term]; 1xDeamidated [N7(100)]	0.000165272	0	1	7	1	530381015	530381015 [356-375]	0	2372.17	N7(Deamidated): 100	8.6	7	9.3	11.7	5.4	7.8	8.3	8.3	1	1.05	Unique	2.53788	High	0	2.139e-06
HS2ST1	9653	6912420	NP_036394.1	108	Yes	Yes	8	NTT	KYHVLHI	TTKNNPV	Yes	High	[K].YHVLHINTTK.[N]	2xTMT6plex [N-Term; K10]; 1xDeamidated [N7(100)]	0.00426879	0	1	2	6	6912420	6912420 [102-111]	0	1684.98	N7(Deamidated): 100	10	9.6	8.9	7.8	6.5	14.9	9.5	9.73333	1.02456	#DIV/0!	Unique	2.4294	High	0	0.0002103
HS2ST1	9653	6912420	NP_036394.1	108	Yes	Yes	8	NTT	KYHVLHI	TTKNNPV	Yes	High	[K].YHVLHINTTK.[N]	1xTMT6plex [K10]; 1xDeamidated [N7(100)]	0.0359374	0	1	2	4	6912420	6912420 [102-111]	0	1455.82	N7(Deamidated): 100	13.5	12.5	7	8.6	6.8	16.9	11	10.7667	0.978788	#DIV/0!	Unique	2.05854	High	0	0.004352
HSP90B1	7184	4507677	NP_003290.1	445	Yes	Yes	12	NVS	DSDDLPL	VSRETLQ	Yes	High	[K].GVVDSDDLPLNVSR.[E]	1xTMT6plex [N-Term]; 1xDeamidated [N11(100)]	1.9095e-07	0	1	1	5	4507677	4507677 [435-448]	0	1715.9	N11(Deamidated): 100	41.2	20.4	16	30	17.3	54.2	25.8667	33.8333	1.30799	1.22	Unique	3.75176	High	0	1.519e-10
HSP90B1	7184	4507677	NP_003290.1	217	Yes	Yes	4	NDT	IVTSKHN	DTQHIWE	Yes	High	[K].HNNDTQHIWESDSNEFSVIADPR.[G]	1xTMT6plex [N-Term]; 2xDeamidated [N2(100); N14(100)]	0.000212088	0	1	1	7	4507677	4507677 [215-237]	0	2942.34	N2(Deamidated): 100; N3(Deamidated): 100	15.8	7	8.3	10.6	8.2	9	10.3667	9.26667	0.893891	1.22	Unique	2.14796	High	0	0.0001573
HSP90B1	7184	4507677	NP_003290.1	217	Yes	No	4	NDT	IVTSKHN	DTQHIWE	Yes	High	[K].HNNDTQHIWESDSNEFSVIADPR.[G]	1xTMT6plex [N-Term]; 1xDeamidated [N]	4.19399e-08	0	1	1	28	4507677	4507677 [215-237]	0	2941.36	N2(Deamidated): 50; N3(Deamidated): 50	28.1	21	26.7	29.4	20.5	42.3	25.2667	30.7333	1.21636	1.22	Unique	5.82079	High	0	1.904e-11
HSP90B1	7184	4507677	NP_003290.1	502	Yes	Yes	10	NRT	GVIEDHS	RTRLAKL	Yes	High	[K].LGVIEDHSNR.[T]	1xTMT6plex [N-Term]; 1xDeamidated [N9(100)]	0.0070961	0	1	1	3	4507677	4507677 [494-503]	0	1369.73	N9(Deamidated): 100	7.2	3.2	3.8	4.6	3.5	9.8	4.73333	5.96667	1.26056	1.22	Unique	1.74175	High	0	0.00122
HSP90B1	7184	4507677	NP_003290.1	62	Yes	Yes	12	NAS	AIQLDGL	ASQIREL	Yes	High	[R].EEEAIQLDGLNASQIR.[E]	1xTMT6plex [N-Term]; 1xDeamidated [N11(100)]	1.96468e-05	0	1	1	8	4507677	4507677 [52-67]	0	2016.04	N11(Deamidated): 100	11.4	13.1	6.4	10.4	7	33.6	10.3	17	1.65049	1.22	Unique	3.18401	High	0	1.45e-05
HSP90B1	7184	4507677	NP_003290.1	62	Yes	Yes	24	NAS	AIQLDGL	ASQIREL	Yes	High	[R].EGSRTDDEVVQREEEAIQLDGLNASQIR.[E]	1xTMT6plex [N-Term]; 1xDeamidated [N23(100)]	6.90366e-05	0	1	1	3	4507677	4507677 [40-67]	2	3387.68	N23(Deamidated): 100	12.6	10.6	7.7	19.1	8.5	11.7	10.3	13.1	1.27184	1.22	Unique	3.18451	High	0	6.249e-07
HSP90B1	7184	4507677	NP_003290.1	62	Yes	Yes	20	NAS	AIQLDGL	ASQIREL	Yes	High	[R].TDDEVVQREEEAIQLDGLNASQIR.[E]	1xTMT6plex [N-Term]; 1xDeamidated [N19(100)]	1.23788e-19	0	1	1	19	4507677	4507677 [44-67]	1	2958.49	N19(Deamidated): 100	119.5	176.2	74.3	108	83.4	355.3	123.333	182.233	1.47757	1.22	Unique	7.93539	High	0	9.44967e-28
HSPA13	6782	48928056	NP_008879.3	184	Yes	Yes	4	NST	EFDLKQR	STIEAAN	No	High	[K].QRNSTIEAANLAGLK.[I]	2xTMT6plex [N-Term; K15]; 1xDeamidated [N3(100)]	0.0770426	0.00173548	1	1	3	48928056	48928056 [182-196]	1	2045.18	N3(Deamidated): 100		4.1	4.6	11.1	3.6	10.2	4.35	8.3	1.90805	1.16	Unique	1.63202	High	0.0004721	0.01311
HSPA13	6782	48928056	NP_008879.3	137	Yes	Yes	16	NET	VEFSVTS	ETITVSP	No	High	[K].VLNKNGMVEFSVTSNETITVSPEYVGSR.[L]	2xTMT6plex [N-Term; K4]; 1xOxidation [M7(100)]; 2xDeamidated [N3(100); N5(98.6)]	0.0083918	0	1	1	1	48928056	48928056 [123-150]	1	3533.81	N3(Deamidated): 99.98; N5(Deamidated): 98.59; M7(Oxidation): 100	28.8	22.9	23.1	38.9	26.8	28.7	24.9333	31.4667	1.26203	1.16	Unique	2.03697	High	0	0.0005463
HSPA13	6782	48928056	NP_008879.3	184	Yes	Yes	2	NST	EFDLKQR	STIEAAN	No	High	[R].NSTIEAANLAGLK.[I]	2xTMT6plex [N-Term; K13]; 1xDeamidated [N1(100)]	0.0493989	0.000598249	1	1	2	48928056	48928056 [184-196]	0	1761.02	N1(Deamidated): 100	22.1	19.5	22.4	26.7	16.5	37.8	21.3333	27	1.26562	1.16	Unique	2.04039	High	0.000164	0.006872
HSPA13	6782	48928056	NP_008879.3	184	Yes	Yes	2	NST	EFDLKQR	STIEAAN	No	High	[R].NSTIEAANLAGLK.[I]	1xTMT6plex [K13]; 1xDeamidated [N1(100)]	0.00517129	0	1	1	3	48928056	48928056 [184-196]	0	1531.85	N1(Deamidated): 100	31.3	24.7	25	24.7	31.9	25.6	27	27.4	1.01481	1.16	Unique	2.66344	High	0	0.0005953
HSPG2	3339	767903957	XP_011539620.1	1938	Yes	Yes	7	NTS	CRNLHQS	TSRAELL	No	High	[R].NLHQSNTSR.[A]	1xTMT6plex [N-Term]; 1xDeamidated [N6(100)]	0.00039564	0	1	6	8	767903957	767903957 [1933-1941]	0	1286.67	N6(Deamidated): 100	37.2	60.5	47.6	37.7	48.8	34.6	48.4333	40.3667	0.833448	#N/A	Unique	3.03558	High	0	7.31e-06
HSPG2	3339	767903957	XP_011539620.1	3963	Yes	Yes	17	NGT	VGDLAPV	GTSQGKF	No	High	[R].SLTQGSLIVGDLAPVNGTSQGK.[F]	1xTMT6plex [K22]; 1xDeamidated [N16(100)]	0.000660947	0	1	6	4	767903957	767903957 [3948-3969]	0	2372.29	N16(Deamidated): 100	8.7	8.4	8.5	5.4	10.6	8.7	8.53333	8.23333	0.964844	#N/A	Unique	2.50959	High	0	1.513e-05
HYOU1	10525	1034571662	XP_016872584.1	922	Yes	Yes	4	NGT	RPRPKDK	GTRAEPP	Yes	High	[K].DKNGTRAEPPLNASASDQGEK.[V]	3xTMT6plex [N-Term; K2; K21]; 2xDeamidated [N3(100); N12(100)]	2.08139e-06	0	1	2	13	1034571662	1034571662 [920-940]	2	2874.5	N3(Deamidated): 100; N12(Deamidated): 100	29.3	41.5	26	115.1	26.6	36.8	32.2667	59.5	1.84401	1.08	Unique	3.31487	High	0	8.527e-09
HYOU1	10525	1034571662	XP_016872584.1	922	Yes	Yes	4	NGT	RPRPKDK	GTRAEPP	Yes	High	[K].DKNGTRAEPPLNASASDQGEK.[V]	2xTMT6plex [K2; K21]; 2xDeamidated [N3(100); N12(100)]	0.000314282	0	1	2	3	1034571662	1034571662 [920-940]	2	2645.34	N3(Deamidated): 100; N12(Deamidated): 100	5.5	8.4	8.6	22.1	7.4	9	7.5	12.8333	1.71111	1.08	Unique	2.78588	High	0	5.289e-06
HYOU1	10525	1034571662	XP_016872584.1	922	Yes	Yes	4	NGT	RPRPKDK	GTRAEPP	Yes	High	[K].DKNGTRAEPPLNASASDQGEK.[V]	2xTMT6plex [K2; K21]; 1xDeamidated [N3(100)]	0.0806643	0.00222925	1	2	1	1034571662	1034571662 [920-940]	2	2644.36	N3(Deamidated): 100	6.2	10.1	8.4	34	10.4	12.8	8.23333	19.0667	2.31579	1.08	Unique	2.34514	High	0.0005939	0.01405
HYOU1	10525	1034571662	XP_016872584.1	596	Yes	Yes	3	NGT	TTPDAKE	GTDTVQE	Yes	High	[K].ENGTDTVQEEEESPAEGSK.[D]	1xTMT6plex [K19]; 1xDeamidated [N2(100)]	0.0458465	0	1	2	4	1034571662	1034571662 [595-613]	0	2266	N2(Deamidated): 100	8.6	12	11	9	11.8	9.9	10.5333	10.2333	0.971519	1.08	Unique	1.64356	High	0.0005939	0.01695
HYOU1	10525	1034571662	XP_016872584.1	596	Yes	Yes	3	NGT	TTPDAKE	GTDTVQE	Yes	High	[K].ENGTDTVQEEEESPAEGSK.[D]	2xTMT6plex [N-Term; K19]; 1xDeamidated [N2(100)]	8.05155e-07	0	1	2	4	1034571662	1034571662 [595-613]	0	2495.17	N2(Deamidated): 100	13.7	16.2	17.8	10.5	25.5	13.6	15.9	16.5333	1.03983	1.08	Unique	3.32293	High	0	1.165e-09
HYOU1	10525	1034571662	XP_016872584.1	596	Yes	Yes	3	NGT	TTPDAKE	GTDTVQE	Yes	High	[K].ENGTDTVQEEEESPAEGSKDEPGEQVELK.[E]	3xTMT6plex [N-Term; K19; K29]; 1xDeamidated [N2(100)]	7.2777e-05	0	1	2	3	1034571662	1034571662 [595-623]	1	3848.87	N2(Deamidated): 100	7.3	9.6	9.5	4.4	10.9	10.6	8.8	8.63333	0.981061	1.08	Unique	2.872	High	0	6.696e-07
HYOU1	10525	1034571662	XP_016872584.1	596	Yes	Yes	3	NGT	TTPDAKE	GTDTVQE	Yes	High	[K].ENGTDTVQEEEESPAEGSKDEPGEQVELKEEAEAPVEDGSQPPPPEPK.[G]	3xTMT6plex [K19; K29; K48]; 1xDeamidated [N2(100)]	0.147367	0.00357109	1	2	2	1034571662	1034571662 [595-642]	2	5832.77	N2(Deamidated): 100	3.3	4.3	4				3.86667	#DIV/0!	#DIV/0!	1.08	Unique	2.03476	High	0.003647	0.06958
HYOU1	10525	1034571662	XP_016872584.1	869	Yes	Yes	2	NAT	NETWAWK	ATLAEQA	Yes	High	[K].NATLAEQAK.[L]	1xTMT6plex [K9]; 1xDeamidated [N1(100)]	0.0289399	0	1	2	9	1034571662	1034571662 [869-877]	0	1175.65	N1(Deamidated): 100	44.4	73.5	48.4	25.7	39.8	201.3	55.4333	88.9333	1.60433	1.08	Unique	2.57218	High	0.0005939	0.01666
HYOU1	10525	1034571662	XP_016872584.1	869	Yes	Yes	2	NAT	NETWAWK	ATLAEQA	Yes	High	[K].NATLAEQAKLPATEKPVLLSK.[D]	3xTMT6plex [K9; K15; K21]; 1xDeamidated [N1(100)]	0.0123049	0	1	2	2	1034571662	1034571662 [869-889]	1	2910.75	N1(Deamidated): 100	6.2	5.6	7	24.2	6.2	6.4	6.26667	12.2667	1.95745	1.08	Unique	1.93029	High	0	0.0009395
HYOU1	10525	1034571662	XP_016872584.1	862	Yes	Yes	4	NET	TTLEKVI	ETWAWKN	Yes	High	[K].VINETWAWK.[N]	2xTMT6plex [N-Term; K9]; 1xDeamidated [N3(100)]	1.03807e-05	0	1	2	1	1034571662	1034571662 [860-868]	0	1605.9	N3(Deamidated): 100	33	36.1	35.9	15.7	33.8	62.3	35	37.2667	1.06476	1.08	Unique	3.2564	High	0	4.281e-08
HYOU1	10525	1034571662	XP_016872584.1	931	Yes	Yes	7	NAS	TRAEPPL	ASASDQG	Yes	High	[R].AEPPLNASASDQGEK.[V]	1xTMT6plex [K15]; 1xDeamidated [N6(100)]	5.12773e-05	0	1	2	5	1034571662	1034571662 [926-940]	0	1743.86	N6(Deamidated): 100	16.3	19	26.6	9.4	23.1	24.9	20.6333	19.1333	0.927302	1.08	Unique	3.28782	High	0	4.087e-07
HYOU1	10525	1034571662	XP_016872584.1	931	Yes	Yes	7	NAS	TRAEPPL	ASASDQG	Yes	High	[R].AEPPLNASASDQGEK.[V]	2xTMT6plex [N-Term; K15]; 1xDeamidated [N6(100)]	9.48197e-10	0	1	2	18	1034571662	1034571662 [926-940]	0	1973.02	N6(Deamidated): 100	145.3	227	210.1	90	186.7	337.9	194.133	204.867	1.05529	1.08	Unique	6.25629	High	0	8.494e-14
HYOU1	10525	1034571662	XP_016872584.1	830	Yes	Yes	10	NHS	SALDNLL	HSSMFLK	Yes	High	[R].LSALDNLLNHSSMFLK.[G]	1xTMT6plex [K16]; 1xOxidation [M13(100)]; 1xDeamidated [N9(100)]	0.0294912	0	1	2	2	1034571662	1034571662 [822-837]	0	2049.09	N9(Deamidated): 100; M13(Oxidation): 100	38.8	41.1	39.6	29.3	39.9	39	39.8333	36.0667	0.905439	1.08	Unique	2.90223	High	0	0.003277
HYOU1	10525	1034571662	XP_016872584.1	515	Yes	Yes	7	NLT	LRVFGSQ	LTTVKLK	Yes	High	[R].VFGSQNLTTVK.[L]	2xTMT6plex [N-Term; K11]; 1xDeamidated [N6(100)]	4.13347e-07	0	1	2	16	1034571662	1034571662 [510-520]	0	1652.96	N6(Deamidated): 100	178.5	220.7	176.6	195.6	169.4	379.4	191.933	248.133	1.29281	1.08	Unique	4.64656	High	0	4.527e-10
HYOU1	10525	1034571662	XP_016872584.1	515	Yes	Yes	7	NLT	LRVFGSQ	LTTVKLK	Yes	High	[R].VFGSQNLTTVK.[L]	1xTMT6plex [K11]; 1xDeamidated [N6(100)]	0.0016127	0	1	2	13	1034571662	1034571662 [510-520]	0	1423.8	N6(Deamidated): 100	151.6	206.7	208.1	158.6	204.1	308.1	188.8	223.6	1.18432	1.08	Unique	3.38426	High	0	5.333e-05
ICAM1	3383	167466198	NP_000192.2	145	Yes	Yes	3	NLT	EGGAPRA	LTVVLLR	Yes	High	[R].ANLTVVLLR.[G]	1xTMT6plex [N-Term]; 1xDeamidated [N2(100)]	0.102774	0.00222925	1	1	2	167466198	167466198 [144-152]	0	1228.78	N2(Deamidated): 100	13.1		26.3	3.8	10.1		19.7	6.95	0.352792	0.72	Unique	1.9777	High	0.0005939	0.02
ICAM1	3383	167466198	NP_000192.2	183	Yes	Yes	7	NFS	RRDHHGA	FSCRTEL	Yes	High	[R].DHHGANFSCR.[T]	1xCarbamidomethyl [C9]; 1xTMT6plex [N-Term]; 1xDeamidated [N6(100)]	0.148683	0.00357109	1	1	2	167466198	167466198 [178-187]	0	1430.64	N6(Deamidated): 100	12.7	12.9	24.1	32.7	21.1	22.9	16.5667	25.5667	1.54326	0.72	Unique	1.44951	High	0.007031	0.1178
ICAM1	3383	167466198	NP_000192.2	260	Yes	Yes	3	NPT	ALGDQRL	PTVTYGN	Yes	High	[R].LNPTVTYGNDSFSAK.[A]	2xTMT6plex [N-Term; K15]; 1xDeamidated [N9(100)]	1.28816e-05	0	1	1	10	167466198	167466198 [259-273]	0	2073.09	N9(Deamidated): 100	50.3	6.4	85.5	20.4	40.4	6.9	47.4	22.5667	0.47609	0.72	Unique	3.5025	High	0	3.921e-05
ICAM1	3383	167466198	NP_000192.2	260	Yes	Yes	3	NPT	ALGDQRL	PTVTYGN	Yes	High	[R].LNPTVTYGNDSFSAK.[A]	1xTMT6plex [K15]; 1xDeamidated [N9(100)]	9.03096e-05	0	1	1	7	167466198	167466198 [259-273]	0	1843.93	N9(Deamidated): 100	57.2	11.1	125	20.2	59.5	14.6	64.4333	31.4333	0.487843	0.72	Unique	4.13435	High	0	9.11e-07
ICAM2	3384	153082722	NP_001093259.1	153	Yes	Yes	3	NET	TLFLFRG	ETLHYET	Yes	High	[R].GNETLHYETFGK.[A]	2xTMT6plex [N-Term; K12]; 1xDeamidated [N2(100)]	0.013282	0	1	1	2	153082722	153082722 [152-163]	0	1854.96	N2(Deamidated): 100	6.4	6.2	4.5	7.3	15.8	4.9	5.7	9.33333	1.63743	#N/A	Unique	1.69205	High	0	0.003249
IDS	3423	4557659	NP_000193.1	115	Yes	Yes	6	NFS	YWRVHAG	FSTIPQY	No	High	[R].VHAGNFSTIPQYFK.[E]	2xTMT6plex [N-Term; K14]; 1xDeamidated [N5(100)]	0.00418769	0	1	3	3	4557659	4557659 [111-124]	0	2068.13	N5(Deamidated): 100	8.9	8.9	11	6.9	8.2	10.1	9.6	8.4	0.875	#N/A	Unique	2.14498	High	0	0.0002045
IDS	3423	4557659	NP_000193.1	115	Yes	Yes	6	NFS	YWRVHAG	FSTIPQY	No	High	[R].VHAGNFSTIPQYFK.[E]	1xTMT6plex [K14]; 1xDeamidated [N5(100)]	0.00888823	0	1	3	3	4557659	4557659 [111-124]	0	1838.96	N5(Deamidated): 100	5.8	5.5	6.8	2.9	5.5	6.7	6.03333	5.03333	0.834254	#N/A	Unique	2.08125	High	0	0.0005954
IFNGR1	3459	4557880	NP_000407.1	179	Yes	Yes	3	NGS	YNVYVRM	GSEIQYK	Yes	High	[R].MNGSEIQYK.[I]	1xTMT6plex [K9]; 1xOxidation [M1(100)]; 1xDeamidated [N2(100)]	0.00474369	0	1	3	2	4557880	4557880 [178-186]	0	1315.64	M1(Oxidation): 100; N2(Deamidated): 100	17.7	15.9	13.1	11.8	14.7	18.7	15.5667	15.0667	0.96788	#N/A	Unique	2.29278	High	0	0.0002446
IGF1R	3480	1034590455	XP_016877626.1	772	Yes	Yes	8	NTT	RDVMQVA	TTMSSRS	No	High	[R].DVMQVANTTMSSR.[S]	1xTMT6plex [N-Term]; 2xOxidation [M3(100); M10(100)]; 1xDeamidated [N7(100)]	0.0139978	0	1	7	7	1034590455	1034590455 [766-778]	0	1701.8	M3(Oxidation): 100; N7(Deamidated): 100; M10(Oxidation): 100	12	10.6	11	12.4	12.2	13.3	11.2	12.6333	1.12798	#N/A	Unique	2.03158	High	0	0.004292
IGF1R	3480	1034590455	XP_016877626.1	925	Yes	Yes	6	NYT	LNRLNPG	YTARIQA	No	High	[R].LNPGNYTAR.[I]	1xTMT6plex [N-Term]; 1xDeamidated [N5(100)]	0.000629997	0	1	7	5	1034590455	1034590455 [921-929]	0	1235.66	N5(Deamidated): 100	26.3	59.8	27.5	25.3	27	27.6	37.8667	26.6333	0.703345	#N/A	Unique	2.31024	High	0	1.416e-05
IGF2R	3482	119964726	NP_000867.2	747	Yes	Yes	15	NST	PEYQEED	STYNFRW	Yes	High	[R].DAGVGFPEYQEEDNSTYNFR.[W]	1xTMT6plex [N-Term]; 1xDeamidated [N14(100)]	4.07382e-06	0	1	1	3	119964726	119964726 [734-753]	0	2568.14	N14(Deamidated): 100	9	11.6	8.4	14.2	9.5	13.2	9.66667	12.3	1.27241	1.52	Unique	3.68552	High	0	1.147e-08
IGF2R	3482	119964726	NP_000867.2	400	Yes	Yes	4	NQT	KAAGRYH	QTLRYSD	Yes	High	[R].YHNQTLR.[Y]	1xTMT6plex [N-Term]; 1xDeamidated [N3(100)]	0.00327922	0	1	1	7	119964726	119964726 [398-404]	0	1161.62	N3(Deamidated): 100	11.1	5.3	8.6	24	7	16.8	8.33333	15.9333	1.912	1.52	Unique	2.46617	High	0	0.0001846
IGFBP3	3486	1034655440	XP_016867641.1	136	Yes	Yes	13	NAS	PAPPAPG	ASESEED	No	High	[R].AYLLPAPPAPGNASESEEDR.[S]	1xTMT6plex [N-Term]; 1xDeamidated [N12(100)]	1.59109e-06	0	1	1	3	1034655440	1034655440 [125-144]	0	2314.14	N12(Deamidated): 100	7.6	10.7	7.6	8.7	7	10.9	8.63333	8.86667	1.02703	#N/A	Unique	3.1246	High	0	3.038e-09
IGFBP3	3486	1034655440	XP_016867641.1	199	Yes	Yes	15	NFS	SQSTDTQ	FSSESKR	No	High	[R].YKVDYESQSTDTQNFSSESKR.[E]	2xTMT6plex [K2; K20]; 1xDeamidated [N14(100)]	0.000642199	0	1	2	2	1034655440	1034655440 [186-206]	2	2958.44	N14(Deamidated): 100	8.3	10.6	5.5	6.2	8.6	6.2	8.13333	7	0.860656	#N/A	Unique	2.00047	High	0	1.45e-05
IGSF3	3321	578798992	XP_006710656.1	850	Yes	Yes	8	NLS	RLSQAQG	LSVLETR	No	High	[R].LSQAQGNLSVLETR.[Q]	1xTMT6plex [N-Term]; 1xDeamidated [N7(100)]	0.00173298	0	1	5	2	578798992	578798992 [844-857]	0	1745.96	N7(Deamidated): 100	8.6	27.2	14.4	12.9	7.3	13.3	16.7333	11.1667	0.667331	#N/A	Unique	2.44569	High	0	5.89e-05
IGSF9	57549	205277425	NP_001128522.1	188	Yes	Yes	16	NGT	QGQVQVQ	GTLRIRR	No	High	[R].GKDLGQGQGQVQVQNGTLR.[I]	2xTMT6plex [N-Term; K2]; 1xDeamidated [N15(100)]	1.56858e-07	0	1	3	3	205277425	205277425 [174-192]	1	2442.35	N15(Deamidated): 100	5.7	61.9	6.9	4.8	4.3	6.4	24.8333	5.16667	0.208054	#N/A	Unique	3.52459	High	0	1.156e-10
IKBIP	121457	24233517	NP_710154.1	154	Yes	Yes	4	NIT	SLNEKFQ	ITDFWKR	No	High	[K].FQNITDFWK.[R]	1xTMT6plex [K9]; 1xDeamidated [N3(100)]	0.0515134	0.000598249	1	1	4	24233517	24233517 [152-160]	0	1428.74	N3(Deamidated): 100	17.2	13.5	23.3	11.1	18.9	22.4	18	17.4667	0.97037	1.2	Unique	2.44679	High	0.0007256	0.02036
IKBIP	121457	42491362	NP_963906.1	328	Yes	Yes	4	NLT	FLSEKIS	LTIVQAE	No	High	[K].ISNLTIVQAEIK.[D]	2xTMT6plex [N-Term; K12]; 1xDeamidated [N3(100)]	0.00847258	0	1	1	2	42491362	42491362 [326-337]	0	1788.09	N3(Deamidated): 100	46	33.3	44.9	33.2	57.6	41.8	41.4	44.2	1.06763	1.22	Unique	2.77816	High	0	0.0005539
IKBIP	121457	42491362	NP_963906.1	328	Yes	Yes	4	NLT	FLSEKIS	LTIVQAE	No	High	[K].ISNLTIVQAEIK.[D]	1xTMT6plex [K12]; 1xDeamidated [N3(100)]	0.00194436	0	1	1	4	42491362	42491362 [326-337]	0	1558.93	N3(Deamidated): 100	16	11.6	15.6	16.6	17.6	20.3	14.4	18.1667	1.26157	1.22	Unique	2.87592	High	0	6.961e-05
IL13RA2	3598	10834992	NP_000631.1	290	Yes	Yes	14	NET	LVTATVE	ETYTLKT	No	High	[R].EDDTTLVTATVENETYTLK.[T]	2xTMT6plex [N-Term; K19]; 1xDeamidated [N13(100)]	1.94677e-08	0	1	1	1	10834992	10834992 [278-296]	0	2602.34	N13(Deamidated): 100	55.6	93	80.4	99.3	64	597.5	76.3333	253.6	3.32227	#N/A	Unique	5.74872	High	0	6.053e-12
IL4R	3566	384229035	NP_001244335.1	176	Yes	Yes	4	NVT	PADFRIY	VTYLEPS	No	High	[R].IYNVTYLEPSLR.[I]	1xTMT6plex [N-Term]; 1xDeamidated [N3(100)]	0.000229005	0	1	6	1	384229035	384229035 [174-185]	0	1697.93	N3(Deamidated): 100	25.5	18.7	19.9	16.4	20	16.4	21.3667	17.6	0.823713	#N/A	Unique	2.88854	High	0	3.395e-06
IL6ST	3572	28610147	NP_002175.2	390	Yes	Yes	5	NLT	NATKLTV	LTNDRYL	Yes	High	[K].LTVNLTNDR.[Y]	1xTMT6plex [N-Term]; 1xDeamidated [N4(100)]	0.00412788	0	1	4	4	28610147	28610147 [387-395]	0	1275.71	N4(Deamidated): 100	17.5	17	32.6	18.5	39.6	18.2	22.3667	25.4333	1.13711	#N/A	Unique	2.92405	High	0	0.0002004
IL6ST	3572	28610147	NP_002175.2	390	Yes	Yes	5	NLT	NATKLTV	LTNDRYL	Yes	High	[K].LTVNLTNDR.[Y]	1xTMT6plex [N-Term]; 2xDeamidated [N4(100); N7(100)]	0.0396582	0	1	4	1	28610147	28610147 [387-395]	0	1276.69	N4(Deamidated): 100; N7(Deamidated): 100	11.1	4.7	17	10.9	19	16.5	10.9333	15.4667	1.41463	#N/A	Unique	1.9928	High	0	0.005014
IL6ST	3572	28610147	NP_002175.2	379	Yes	Yes	6	NYT	RWKSHLQ	YTVNATK	Yes	High	[K].SHLQNYTVNATK.[L]	2xTMT6plex [N-Term; K12]; 2xDeamidated [N5(100); N9(100)]	0.00324792	0	1	4	4	28610147	28610147 [375-386]	0	1835.99	N5(Deamidated): 100; N9(Deamidated): 100		8.6	9.7	7.7	14.2	4.5	9.15	8.8	0.961749	#N/A	Unique	2.30686	High	0	0.001817
IL6ST	3572	28610147	NP_002175.2	227	Yes	Yes	9	NLS	VKPNPPH	LSVINSE	Yes	High	[K].VKPNPPHNLSVINSEELSSILK.[L]	3xTMT6plex [N-Term; K2; K22]; 1xDeamidated [N8(100)]	4.07318e-05	0	1	3	3	28610147	28610147 [220-241]	0	3103.8	N8(Deamidated): 99.99	6.1	4.3	9.3	11.3	11.2	6.8	6.56667	9.76667	1.48731	#N/A	Unique	2.79313	High	0	7.951e-07
IL6ST	3572	28610147	NP_002175.2	227	Yes	Yes	9	NLS	VKPNPPH	LSVINSE	Yes	High	[K].VKPNPPHNLSVINSEELSSILK.[L]	3xTMT6plex [N-Term; K2; K22]; 2xDeamidated [N4(100); N8(100)]	1.95556e-06	0	1	3	1	28610147	28610147 [220-241]	0	3104.78	N4(Deamidated): 100; N8(Deamidated): 100	9.1	4.6	10.1	9.9	12.5	7	7.93333	9.8	1.23529	#N/A	Unique	2.93322	High	0	4.062e-09
IL6ST	3572	28610147	NP_002175.2	157	Yes	Yes	8	NFT	RETHLET	FTLKSEW	Yes	High	[R].ETHLETNFTLK.[S]	2xTMT6plex [N-Term; K11]; 1xDeamidated [N7(100)]	1.5759e-06	0	1	3	4	28610147	28610147 [151-161]	0	1791.99	N7(Deamidated): 100	7.9	6.1	15.1	12.4	20.1	10	9.7	14.1667	1.46048	#N/A	Unique	4.45502	High	0	2.992e-09
IMPAD1	54928	157388900	NP_060283.3	259	Yes	Yes	10	NQT	VALQTFG	QTTIIPA	Yes	High	[K].QVALQTFGNQTTIIPAGGAGYK.[V]	2xTMT6plex [N-Term; K22]; 1xDeamidated [N9(100)]	2.24775e-07	0	1	1	8	157388900	157388900 [251-272]	0	2694.49	N9(Deamidated): 100	22.6	27.8	18.7	18.8	26.8	49.7	23.0333	31.7667	1.37916	1.2	Unique	4.32324	High	0	4.997e-10
IMPAD1	54928	157388900	NP_060283.3	259	Yes	Yes	10	NQT	VALQTFG	QTTIIPA	Yes	High	[K].QVALQTFGNQTTIIPAGGAGYK.[V]	1xTMT6plex [K22]; 1xDeamidated [N9(100)]	2.438e-05	0	1	1	3	157388900	157388900 [251-272]	0	2465.32	N9(Deamidated): 100	14.2	19	13	15.2	19.1	25.1	15.4	19.8	1.28571	1.2	Unique	3.38237	High	0	1.429e-07
INSR	3643	119395736	NP_000199.2	920	Yes	Yes	7	NYS	LRGLSPG	YSVRIRA	Yes	High	[R].GLSPGNYSVR.[I]	1xTMT6plex [N-Term]; 1xDeamidated [N6(100)]	0.00517129	0	1	4	4	119395736	119395736 [915-924]	0	1279.68	N6(Deamidated): 100	69	45.6	49.7	46.7	20	53.9	54.7667	40.2	0.734023	#N/A	Unique	2.82835	High	0	0.0002767
ITGA1	3672	31657142	NP_852478.1	217	Yes	Yes	13	NVT	GIVQYGE	VTHEFNL	Yes	High	[K].QTQVGIVQYGENVTHEFNLNK.[Y]	2xTMT6plex [N-Term; K21]; 2xDeamidated [N12(100); N18(99.7)]	0.0231731	0	1	1	1	31657142	31657142 [206-226]	0	2878.5	N12(Deamidated): 100; N18(Deamidated): 99.71	7.5	4.9	8.7	16.8	14.9	6.1	7.03333	12.6	1.79147	#N/A	Unique	1.8897	High	0	0.002316
ITGA1	3672	31657142	NP_852478.1	217	Yes	Yes	13	NVT	GIVQYGE	VTHEFNL	Yes	High	[K].QTQVGIVQYGENVTHEFNLNK.[Y]	2xTMT6plex [N-Term; K21]; 1xDeamidated [N12(100)]	6.06784e-08	0	1	1	4	31657142	31657142 [206-226]	0	2877.51	N12(Deamidated): 100	15.5	8.4	10.1	31.6	19.1	8.9	11.3333	19.8667	1.75294	#N/A	Unique	4.08386	High	0	3.022e-11
ITGA1	3672	31657142	NP_852478.1	217	Yes	Yes	13	NVT	GIVQYGE	VTHEFNL	Yes	High	[K].QTQVGIVQYGENVTHEFNLNK.[Y]	1xTMT6plex [K21]; 1xDeamidated [N12(100)]	0.000517538	0	1	1	2	31657142	31657142 [206-226]	0	2648.35	N12(Deamidated): 100	10	6.1	6.8	13.6	13.2	10.6	7.63333	12.4667	1.63319	#N/A	Unique	2.29857	High	0	0.0009152
ITGA1	3672	31657142	NP_852478.1	532	Yes	Yes	8	NQT	KVYVYAL	QTRFEYQ	Yes	High	[K].VYVYALNQTR.[F]	1xTMT6plex [N-Term]; 1xDeamidated [N7(100)]	0.00371462	0	1	1	2	31657142	31657142 [526-535]	0	1456.8	N7(Deamidated): 100	19.3	11.8	10.4	34	27.1	10.2	13.8333	23.7667	1.71807	#N/A	Unique	2.61858	High	0	0.0001732
ITGA1	3672	31657142	NP_852478.1	418	Yes	Yes	2	NTT	SQIIIPR	TTFNVES	Yes	High	[R].NTTFNVESTK.[K]	2xTMT6plex [N-Term; K10]; 1xDeamidated [N1(100)]	0.0115086	0	1	1	1	31657142	31657142 [418-427]	0	1599.86	N1(Deamidated): 99.83	25.2	12.2	17.5	120.4	31.5	12.5	18.3	54.8	2.99454	#N/A	Unique	1.66833	High	0	0.0008532
ITGA1	3672	31657142	NP_852478.1	418	Yes	Yes	2	NTT	SQIIIPR	TTFNVES	Yes	High	[R].NTTFNVESTK.[K]	1xTMT6plex [K10]; 1xDeamidated [N1(100)]	0.0464931	0.000598249	1	1	4	31657142	31657142 [418-427]	0	1370.7	N1(Deamidated): 100	37.5	18	17	122	41.7	17	24.1667	60.2333	2.49241	#N/A	Unique	2.39861	High	0.0005939	0.01809
ITGA1	3672	31657142	NP_852478.1	1113	Yes	Yes	4	NAS	RGELRSE	ASLVLSS	Yes	High	[R].SENASLVLSSSNQK.[R]	2xTMT6plex [N-Term; K14]; 1xDeamidated [N3(100)]	0.00250698	0	1	1	3	31657142	31657142 [1111-1124]	0	1923.04	N3(Deamidated): 100	7.4	7.3	6.9	11.1	10.6	5.7	7.2	9.13333	1.26852	#N/A	Unique	2.39607	High	0	0.0001325
ITGA1	3672	31657142	NP_852478.1	1113	Yes	Yes	4	NAS	RGELRSE	ASLVLSS	Yes	High	[R].SENASLVLSSSNQK.[R]	1xTMT6plex [K14]; 1xDeamidated [N3(100)]	0.00542528	0	1	1	2	31657142	31657142 [1111-1124]	0	1693.88	N3(Deamidated): 100	12.8	8.6	7.2	16.9	19.8	7.3	9.53333	14.6667	1.53846	#N/A	Unique	2.20704	High	0	0.0002956
ITGA1	3672	31657142	NP_852478.1	840	Yes	Yes	8	NVS	RSQNDKF	VSLTVKN	Yes	High	[R].SQNDKFNVSLTVK.[N]	3xTMT6plex [N-Term; K5; K13]; 2xDeamidated [N3(100); N7(100)]	0.00748025	0	1	1	2	31657142	31657142 [834-846]	1	2169.24	N3(Deamidated): 100; N7(Deamidated): 100	12.9	5.2	6.5	50.9	14.1	6.2	8.2	23.7333	2.89431	#N/A	Unique	1.77513	High	0	0.0004642
ITGA1	3672	31657142	NP_852478.1	840	Yes	Yes	8	NVS	RSQNDKF	VSLTVKN	Yes	High	[R].SQNDKFNVSLTVK.[N]	3xTMT6plex [N-Term; K5; K13]; 1xDeamidated [N7(99.7)]	0.0347747	0	1	1	1	31657142	31657142 [834-846]	1	2168.25	N7(Deamidated): 99.74	24.6	13.6	13.9	83.8	32.8	8.9	17.3667	41.8333	2.40883	#N/A	Unique	1.4451	High	0	0.004145
ITGA1	3672	31657142	NP_852478.1	460	Yes	Yes	3	NHT	IAGQPRY	HTGQVII	Yes	High	[R].YNHTGQVIIYR.[M]	1xTMT6plex [N-Term]; 1xDeamidated [N2(100)]	0.00012879	0	1	1	6	31657142	31657142 [459-469]	0	1593.86	N2(Deamidated): 100	21	15.9	7.2	32.1	21.8	15.6	14.7	23.1667	1.57596	#N/A	Unique	3.41977	High	0	4.305e-06
ITGA11	22801	52485853	NP_001004439.1	291	Yes	Yes	10	NVT	IQQSERD	VTRYAVA	No	High	[K].VIQQSERDNVTR.[Y]	1xTMT6plex [N-Term]; 1xDeamidated [N9(100)]	0.0272171	0	1	3	3	52485853	52485853 [283-294]	1	1674.9	N9(Deamidated): 100	5.4	4.6	5	4.6	26.2	6.5	5	12.4333	2.48667	#N/A	Unique	1.70483	High	0.000164	0.006529
ITGA11	22801	52485853	NP_001004439.1	331	Yes	Yes	14	NVT	PDDKHFF	VTDEAAL	No	High	[K].YIASDPDDKHFFNVTDEAALK.[D]	3xTMT6plex [N-Term; K9; K21]; 1xDeamidated [N13(100)]	5.15239e-05	0	1	3	2	52485853	52485853 [319-339]	1	3084.61	N13(Deamidated): 100	9.3	4.6	8.3	5.5	38.3	7	7.4	16.9333	2.28829	#N/A	Unique	2.46575	High	0	4.128e-07
ITGA2	3673	116295258	NP_002194.2	1074	Yes	Yes	12	NVT	MKGEYFV	VTTRIWN	Yes	High	[K].DVHMKGEYFVNVTTR.[I]	2xTMT6plex [N-Term; K5]; 1xOxidation [M4(100)]; 1xDeamidated [N11(100)]	2.70935e-05	0	1	1	7	116295258	116295258 [1064-1078]	1	2271.18	M4(Oxidation): 100; N11(Deamidated): 100	17	30.2	16.7	13.8	21.2	17.9	21.3	17.6333	0.827856	0.89	Unique	2.68662	High	0	1.662e-07
ITGA2	3673	116295258	NP_002194.2	1074	Yes	Yes	7	NVT	MKGEYFV	VTTRIWN	Yes	High	[K].GEYFVNVTTR.[I]	1xTMT6plex [N-Term]; 1xDeamidated [N6(100)]	4.09277e-05	0	1	1	6	116295258	116295258 [1069-1078]	0	1415.74	N6(Deamidated): 100	101.6	272.2	134.6	24.7	239.5	52.1	169.467	105.433	0.622148	0.89	Unique	3.57031	High	0	2.291e-06
ITGA2	3673	116295258	NP_002194.2	105	Yes	Yes	12	NVT	QTSTSIP	VTEMKTN	Yes	High	[K].LNLQTSTSIPNVTEMK.[T]	2xTMT6plex [N-Term; K16]; 1xOxidation [M15(100)]; 2xDeamidated [N2(100); N11(100)]	1.21611e-05	0	1	1	6	116295258	116295258 [95-110]	0	2252.21	N2(Deamidated): 100; N11(Deamidated): 100; M15(Oxidation): 100	11.4	22.2	9.8	9.3	12.5	10.7	14.4667	10.8333	0.748848	0.89	Unique	3.14979	High	0	5.376e-08
ITGA2	3673	116295258	NP_002194.2	105	Yes	Yes	12	NVT	QTSTSIP	VTEMKTN	Yes	High	[K].LNLQTSTSIPNVTEMK.[T]	2xTMT6plex [N-Term; K16]; 1xOxidation [M15(100)]; 1xDeamidated [N11(99.1)]	3.54477e-06	0	1	1	2	116295258	116295258 [95-110]	0	2251.23	N11(Deamidated): 100; M15(Oxidation): 100	18.1	44.7	24.8	9.8	34.6	9.9	29.2	18.1	0.619863	0.89	Unique	4.19678	High	0	9.439e-09
ITGA2	3673	116295258	NP_002194.2	105	Yes	Yes	12	NVT	QTSTSIP	VTEMKTN	Yes	High	[K].LNLQTSTSIPNVTEMK.[T]	1xTMT6plex [K16]; 1xOxidation [M15(100)]; 1xDeamidated [N11(100)]	0.00334273	0	1	1	4	116295258	116295258 [95-110]	0	2022.06	N11(Deamidated): 100; M15(Oxidation): 100	7.8	10.8	5.7	5.9	8.4	7.2	8.1	7.16667	0.884774	0.89	Unique	1.86243	High	0	0.0001489
ITGA2	3673	116295258	NP_002194.2	432	Yes	Yes	12	NHS	DQILQDR	HSSYLGY	Yes	High	[K].QAFDQILQDRNHSSYLGYSVAAISTGESTHFVAGAPR.[A]	1xTMT6plex [N-Term]; 1xDeamidated [N11(100)]	1.08939e-07	0	1	1	2	116295258	116295258 [422-458]	1	4224.09	N11(Deamidated): 100	6.1	7.1	4.8	6.7	5.2	5.8	6	5.9	0.983333	0.89	Unique	5.49922	High	0	6.904e-11
ITGA2	3673	116295258	NP_002194.2	112	Yes	Yes	3	NMS	NVTEMKT	MSLGLIL	Yes	High	[K].TNMSLGLILTR.[N]	1xTMT6plex [N-Term]; 1xOxidation [M3(100)]; 1xDeamidated [N2(100)]	0.000339349	0	1	1	5	116295258	116295258 [111-121]	0	1464.83	N2(Deamidated): 100; M3(Oxidation): 100	59.9	163.2	75.9	43.4	92.5	30.7	99.6667	55.5333	0.557191	0.89	Unique	2.49911	High	0	7.061e-05
ITGA2	3673	116295258	NP_002194.2	460	Yes	Yes	3	NYT	VAGAPRA	YTGQIVL	Yes	High	[R].ANYTGQIVLYSVNENGNITVIQAHR.[G]	1xTMT6plex [N-Term]; 3xDeamidated [N2(100); N15(100); N17(100)]	2.15341e-09	0	1	1	17	116295258	116295258 [459-483]	0	3006.54	N2(Deamidated): 100; N15(Deamidated): 99.65; N17(Deamidated): 100	64.4	61.6	51.8	84.6	63.4	60.3	59.2667	69.4333	1.17154	0.89	Unique	6.15756	High	0	2.406e-09
ITGA2	3673	116295258	NP_002194.2	343	Yes	Yes	5	NVS	PTERYFF	VSDEAAL	Yes	High	[R].YFFNVSDEAALLEK.[A]	2xTMT6plex [N-Term; K14]; 1xDeamidated [N4(100)]	1.23427e-08	0	1	1	7	116295258	116295258 [340-353]	0	2105.12	N4(Deamidated): 100	506.3	1574.8	829.4	371.1	932.4	236.3	970.167	513.267	0.52905	0.89	Unique	6.18039	High	0	3.19e-12
ITGA2	3673	116295258	NP_002194.2	343	Yes	Yes	5	NVS	PTERYFF	VSDEAAL	Yes	High	[R].YFFNVSDEAALLEK.[A]	1xTMT6plex [K14]; 1xDeamidated [N4(100)]	0.0144043	0	1	1	2	116295258	116295258 [340-353]	0	1875.96	N4(Deamidated): 100	331.8	510.5	383.1	183.8	374.2	269.2	408.467	275.733	0.675045	0.89	Unique	3.68377	High	0	0.002157
ITGA3	3675	4504747	NP_002195.1	656	Yes	Yes	7	NVT	RKLLLSI	VTNTRTS	Yes	High	[K].LLLSINVTNTR.[T]	1xTMT6plex [N-Term]; 1xDeamidated [N6(100)]	0.00420782	0	1	2	2	4504747	4504747 [651-661]	0	1473.88	N6(Deamidated): 100	19.9	27.6	28.8	18.8	22.3	43.3	25.4333	28.1333	1.10616	1.09	Unique	2.54572	High	0	0.0002061
ITGA3	3675	4504747	NP_002195.1	573	Yes	Yes	10	NYS	RPIIISM	YSLPLRM	Yes	High	[K].LRPIIISMNYSLPLR.[M]	1xTMT6plex [N-Term]; 1xOxidation [M8(100)]; 1xDeamidated [N9(100)]	1.19299e-05	0	1	2	3	4504747	4504747 [565-579]	0	2032.18	M8(Oxidation): 100; N9(Deamidated): 100	14.6	13.6	14.7	11.7	15.3	15.6	14.3	14.2	0.993007	1.09	Unique	3.65458	High	0	5.21e-08
ITGA3	3675	4504747	NP_002195.1	573	Yes	Yes	12	NYS	RPIIISM	YSLPLRM	Yes	High	[R].DKLRPIIISMNYSLPLR.[M]	2xTMT6plex [N-Term; K2]; 1xOxidation [M10(100)]; 1xDeamidated [N11(100)]	0.0452087	0	1	2	2	4504747	4504747 [563-579]	1	2504.47	M10(Oxidation): 100; N11(Deamidated): 100	3.9	4	5.2		4.8	4.2	4.36667	4.5	1.03053	1.09	Unique	2.37194	High	0	0.00606
ITGA3	3675	4504747	NP_002195.1	573	Yes	Yes	12	NYS	RPIIISM	YSLPLRM	Yes	High	[R].DKLRPIIISMNYSLPLR.[M]	1xTMT6plex [K2]; 1xOxidation [M10(100)]; 1xDeamidated [N11(100)]	0.0512742	0.000598249	1	2	1	4504747	4504747 [563-579]	1	2275.3	M10(Oxidation): 100; N11(Deamidated): 100					2.9		#DIV/0!	2.9	#DIV/0!	1.09	Unique	1.34163	High	0.000164	0.00727
ITGA3	3675	4504747	NP_002195.1	86	Yes	Yes	11	NRT	AVPDGYT	RTGAVYL	Yes	High	[R].ELAVPDGYTNR.[T]	1xTMT6plex [N-Term]; 1xDeamidated [N10(100)]	6.09422e-05	0	1	2	22	4504747	4504747 [77-87]	0	1464.75	N10(Deamidated): 100	192.5	184.5	390.4	224.1	320.9	437.7	255.8	327.567	1.28056	1.09	Unique	4.15362	High	0	5.526e-07
ITGA3	3675	4504747	NP_002195.1	656	Yes	Yes	8	NVT	RKLLLSI	VTNTRTS	Yes	High	[R].KLLLSINVTNTR.[T]	2xTMT6plex [K1; N-Term]; 1xDeamidated [N7(100)]	0.00206942	0	1	2	2	4504747	4504747 [650-661]	1	1831.14	N7(Deamidated): 100	6.1	4.1	8.5	5.8	6.9	11	6.23333	7.9	1.26738	1.09	Unique	1.91878	High	0	7.564e-05
ITGA3	3675	4504747	NP_002195.1	605	Yes	Yes	17	NHT	NQAQALE	HTEVQFQ	Yes	High	[R].SLDAYPILNQAQALENHTEVQFQK.[E]	2xTMT6plex [N-Term; K24]; 2xDeamidated [N9(100); N16(100)]	1.92819e-08	0	1	2	6	4504747	4504747 [590-613]	0	3217.68	N9(Deamidated): 100; N16(Deamidated): 100	9.6	7.7	11.5	11.6	12.5	12.9	9.6	12.3333	1.28472	1.09	Unique	4.04389	High	0	5.979e-12
ITGA3	3675	4504747	NP_002195.1	605	Yes	Yes	17	NHT	NQAQALE	HTEVQFQ	Yes	High	[R].SLDAYPILNQAQALENHTEVQFQK.[E]	2xTMT6plex [N-Term; K24]; 1xDeamidated [N16(100)]	9.0893e-16	0	1	2	8	4504747	4504747 [590-613]	0	3216.69	N16(Deamidated): 100	714.4	663.9	1628.2	593.6	1123.5	1864.2	1002.17	1193.77	1.19119	1.09	Unique	9.2597	High	0	1.366e-21
ITGA3	3675	4504747	NP_002195.1	605	Yes	Yes	17	NHT	NQAQALE	HTEVQFQ	Yes	High	[R].SLDAYPILNQAQALENHTEVQFQK.[E]	1xTMT6plex [K24]; 1xDeamidated [N]	0.000173392	0	1	2	2	4504747	4504747 [590-613]	0	2987.53	N16(Deamidated): 100	298.4	233.6	261.4	415.2	260.1	252.6	264.467	309.3	1.16952	1.09	Unique	5.40146	High	0	2.282e-06
ITGA3	3675	4504747	NP_002195.1	969	Yes	Yes	11	NKT	IPTINME	KTTWFSV	Yes	High	[R].TSIPTINMENK.[T]	2xTMT6plex [N-Term; K11]; 1xOxidation [M8(100)]; 2xDeamidated [N7(100); N10(100)]	0.00514655	0	1	2	4	4504747	4504747 [960-970]	0	1723.92	N7(Deamidated): 100; M8(Oxidation): 100; N10(Deamidated): 100	16.1	15	25.4	13.8	23.3	31.7	18.8333	22.9333	1.2177	1.09	Unique	1.93184	High	0	0.0002739
ITGA3	3675	4504747	NP_002195.1	969	Yes	Yes	11	NKT	IPTINME	KTTWFSV	Yes	High	[R].TSIPTINMENK.[T]	2xTMT6plex [N-Term; K11]; 1xOxidation [M8(100)]; 1xDeamidated [N10(100)]	0.00327922	0	1	2	11	4504747	4504747 [960-970]	0	1722.93	M8(Oxidation): 100; N10(Deamidated): 100	72.8	59.1	139.6	45.3	89.2	189.1	90.5	107.867	1.1919	1.09	Unique	2.54377	High	0	0.001209
ITGA3	3675	4504747	NP_002195.1	969	Yes	Yes	11	NKT	IPTINME	KTTWFSV	Yes	High	[R].TSIPTINMENK.[T]	1xTMT6plex [K11]; 1xOxidation [M8(100)]; 2xDeamidated [N7(100); N10(100)]	0.0288037	0	1	2	4	4504747	4504747 [960-970]	0	1494.76	N7(Deamidated): 100; M8(Oxidation): 100; N10(Deamidated): 100	26.5	22.9	31.4	44.2	26.9	31.9	26.9333	34.3333	1.27475	1.09	Unique	2.17423	High	0	0.003165
ITGA3	3675	4504747	NP_002195.1	969	Yes	Yes	11	NKT	IPTINME	KTTWFSV	Yes	High	[R].TSIPTINMENK.[T]	1xTMT6plex [K11]; 1xOxidation [M8(100)]; 1xDeamidated [N10(100)]	0.0396582	0	1	2	6	4504747	4504747 [960-970]	0	1493.77	M8(Oxidation): 100; N10(Deamidated): 100	61.7	56.6	131.7	64.4	102.9	125.5	83.3333	97.6	1.1712	1.09	Unique	2.73223	High	0.009471	0.1524
ITGA3	3675	4504747	NP_002195.1	935	Yes	Yes	4	NST	TVKARVW	STFIEDY	Yes	High	[R].VWNSTFIEDYR.[D]	1xTMT6plex [N-Term]; 1xDeamidated [N3(100)]	0.0119572	0	1	2	2	4504747	4504747 [933-943]	0	1659.82	N3(Deamidated): 100	22.1	15.3	27.6	20.5	29.6	40.1	21.6667	30.0667	1.38769	1.09	Unique	2.55871	High	0	0.0009042
ITGA3	3675	4504747	NP_002195.1	935	Yes	Yes	4	NST	TVKARVW	STFIEDY	Yes	High	[R].VWNSTFIEDYRDFDR.[V]	1xTMT6plex [N-Term]; 1xDeamidated [N3(100)]	2.03295e-09	0	1	2	3	4504747	4504747 [933-947]	1	2193.05	N3(Deamidated): 100	140.4	56.9	273.3	98.4	177.6	319.1	156.867	198.367	1.26456	1.09	Unique	5.09356	High	0	2.501e-13
ITGA3	3675	4504747	NP_002195.1	935	Yes	Yes	4	NST	TVKARVW	STFIEDY	Yes	High	[R].VWNSTFIEDYRDFDRVR.[V]	1xTMT6plex [N-Term]; 1xDeamidated [N3(100)]	0.0258383	0	1	2	4	4504747	4504747 [933-949]	2	2448.21	N3(Deamidated): 100	12.8	7.9	15.8	24.3	10.6	16.8	12.1667	17.2333	1.41644	1.09	Unique	2.63268	High	0	0.002703
ITGA5	3678	1017029567	NP_002196.4	297	Yes	Yes	3	NLT	VAGVPKG	LTYGYVT	Yes	High	[K].GNLTYGYVTILNGSDIR.[S]	1xTMT6plex [N-Term]; 2xDeamidated [N2(100); N12(100)]	7.00799e-09	0	1	1	1	1017029567	1017029567 [296-312]	0	2087.09	N2(Deamidated): 100; N12(Deamidated): 100	258.1	216.2	196.4	510.7	227.5	275.5	223.567	337.9	1.51141	1.76	Unique	5.35146	High	0	1.437e-12
ITGA5	3678	1017029567	NP_002196.4	675	Yes	Yes	5	NLT	LGDKNAL	LTFHAQN	Yes	High	[K].NALNLTFHAQNVGEGGAYEAELR.[V]	1xTMT6plex [N-Term]; 2xDeamidated [N1(100); N4(100)]	0.00982823	0	1	1	2	1017029567	1017029567 [672-694]	0	2705.34	N1(Deamidated): 100; N4(Deamidated): 100	10.3	6	7.2	10.4	9.6	16	7.83333	12	1.53191	1.76	Unique	1.79012	High	0	0.0006851
ITGA5	3678	1017029567	NP_002196.4	675	Yes	Yes	5	NLT	LGDKNAL	LTFHAQN	Yes	High	[K].NALNLTFHAQNVGEGGAYEAELR.[V]	1xTMT6plex [N-Term]; 1xDeamidated [N4(99.4)]	1.09479e-08	0	1	1	3	1017029567	1017029567 [672-694]	0	2704.35	N4(Deamidated): 100	5.7	5.9	6.4	15	7.6	13.6	6	12.0667	2.01111	1.76	Unique	4.74616	High	0	2.684e-12
ITGA5	3678	1017029567	NP_002196.4	773	Yes	Yes	4	NNS	QILSKNL	NSQSDVV	Yes	High	[K].NLNNSQSDVVSFR.[L]	1xTMT6plex [N-Term]; 2xDeamidated [N3(100); N4(100)]	0.00100316	0	1	1	7	1017029567	1017029567 [771-783]	0	1710.85	N3(Deamidated): 100; N4(Deamidated): 100	36.3	36	39	114	45.4	52.6	37.1	70.6667	1.90476	1.76	Unique	2.87259	High	0	0.0002589
ITGA5	3678	1017029567	NP_002196.4	773	Yes	Yes	4	NNS	QILSKNL	NSQSDVV	Yes	High	[K].NLNNSQSDVVSFR.[L]	1xTMT6plex [N-Term]; 1xDeamidated [N3(99.7)]	7.00697e-08	0	1	1	7	1017029567	1017029567 [771-783]	0	1709.87	N3(Deamidated): 100	16.2	14.2	13.3	77	23.1	37.8	14.5667	45.9667	3.15561	1.76	Unique	4.26752	High	0	3.71e-11
ITGA5	3678	1017029567	NP_002196.4	712	Yes	Yes	5	NFS	GLVRHPG	FSSLSCD	Yes	High	[R].HPGNFSSLSCDYFAVNQSR.[L]	1xCarbamidomethyl [C10]; 1xTMT6plex [N-Term]; 2xDeamidated [N4(100); N16(100)]	6.36307e-05	0	1	1	4	1017029567	1017029567 [709-727]	0	2417.1	N4(Deamidated): 100; N16(Deamidated): 100	14.3	6.8	7.9	7.9	10	11	9.66667	9.63333	0.996552	1.76	Unique	2.47494	High	0	5.561e-07
ITGA5	3678	1017029567	NP_002196.4	182	Yes	Yes	20	NFT	TCYLSTD	FTRILEY	Yes	High	[R].TEKEPLSDPVGTCYLSTDNFTR.[I]	1xCarbamidomethyl [C13]; 1xTMT6plex [K3]; 1xDeamidated [N19(100)]	0.0680319	0.00117085	1	1	1	1017029567	1017029567 [164-185]	1	2760.32	N19(Deamidated): 100	6.3	3.1	5.3	7.3	6.4	5.9	4.9	6.53333	1.33333	1.76	Unique	1.33406	High	0.0003202	0.01095
ITGA5	3678	1017029567	NP_002196.4	182	Yes	Yes	20	NFT	TCYLSTD	FTRILEY	Yes	High	[R].TEKEPLSDPVGTCYLSTDNFTR.[I]	1xCarbamidomethyl [C13]; 2xTMT6plex [N-Term; K3]; 1xDeamidated [N19(100)]	0.0986468	0.00222925	1	1	3	1017029567	1017029567 [164-185]	1	2989.49	N19(Deamidated): 100	6.9	5.9	5.4	4.4	9.5	17.8	6.06667	10.5667	1.74176	1.76	Unique	1.47629	High	0.0005939	0.01883
ITGA5	3678	1017029567	NP_002196.4	868	Yes	Yes	6	NCT	VTRVTGL	CTTNHPI	Yes	High	[R].VTGLNCTTNHPINPK.[G]	1xCarbamidomethyl [C6]; 2xTMT6plex [N-Term; K15]; 1xDeamidated [N5(100)]	0.000515061	0	1	1	4	1017029567	1017029567 [864-878]	0	2125.15	N5(Deamidated): 100	11.6	8.9	8.2	7	14.3	21.2	9.56667	14.1667	1.48084	1.76	Unique	1.9466	High	0	1.067e-05
ITGA6	3655	119395740	NP_001073286.1	891	Yes	Yes	7	NLT	QKEINSL	LTESHNS	No	High	[K].EINSLNLTESHNSR.[K]	1xTMT6plex [N-Term]; 2xDeamidated [N6(100); N]	0.0303375	0	1	5	3	119395740	119395740 [886-899]	0	1844.92	N6(Deamidated): 100; N12(Deamidated): 100	6.6	7.4	9	7.6	6.1	9.3	7.66667	7.66667	1	#N/A	Unique	1.63155	High	0	0.003394
ITGA6	3655	119395740	NP_001073286.1	891	Yes	Yes	7	NLT	QKEINSL	LTESHNS	No	High	[K].EINSLNLTESHNSR.[K]	1xTMT6plex [N-Term]; 1xDeamidated [N6(100)]	4.91258e-07	0	1	5	5	119395740	119395740 [886-899]	0	1843.93	N6(Deamidated): 100	8.8	15.5	7.7	7.3	7.8	9.8	10.6667	8.3	0.778125	#N/A	Unique	4.15908	High	0	5.765e-10
ITGA6	3655	119395740	NP_001073286.1	284	Yes	Yes	3	NHS	VSGAPRA	HSGAVVL	No	High	[R].ANHSGAVVLLK.[R]	2xTMT6plex [N-Term; K11]; 1xDeamidated [N2(100)]	3.36259e-06	0	1	9	7	119395740	119395740 [283-293]	0	1567.96	N2(Deamidated): 100	16	57.2	23.6	14	19.2	33.5	32.2667	22.2333	0.68905	#N/A	Unique	3.27075	High	0	8.745e-09
ITGA6	3655	119395740	NP_001073286.1	284	Yes	Yes	3	NHS	VSGAPRA	HSGAVVL	No	High	[R].ANHSGAVVLLKR.[D]	2xTMT6plex [N-Term; K11]; 1xDeamidated [N2(100)]	0.0251153	0	1	9	2	119395740	119395740 [283-294]	1	1724.06	N2(Deamidated): 100	8.8	22.9	9.8	18.9	7.8	5.8	13.8333	10.8333	0.783133	#N/A	Unique	1.85831	High	0	0.002589
ITGA6	3655	119395740	NP_001073286.1	370	Yes	Yes	3	NGT	NVKPIRL	GTKDSMF	No	High	[R].LNGTKDSMFGIAVK.[N]	2xTMT6plex [K5; K14]; 1xOxidation [M8(100)]; 1xDeamidated [N2(100)]	0.0968643	0.00222925	1	9	2	119395740	119395740 [369-382]	1	1956.09	N2(Deamidated): 100; M8(Oxidation): 100	20	30.3	22.3	29.5	15.3	18	24.2	20.9333	0.865014	#N/A	Unique	1.85685	High	0.0005939	0.0184
ITGA6	3655	119395740	NP_001073286.1	958	Yes	Yes	4	NST	ILRSRLW	STFLEEY	No	High	[R].LWNSTFLEEYSK.[L]	1xTMT6plex [K12]; 1xDeamidated [N3(100)]	0.00608691	0	1	9	2	119395740	119395740 [956-967]	0	1746.88	N3(Deamidated): 100	17.8	78.4	35.5	20.8	21.6	32	43.9	24.8	0.56492	#N/A	Unique	3.14335	High	0	0.0003468
ITGA6	3655	119395740	NP_001073286.1	958	Yes	Yes	6	NST	ILRSRLW	STFLEEY	No	High	[R].SRLWNSTFLEEYSK.[L]	2xTMT6plex [N-Term; K14]; 1xDeamidated [N5(100)]	0.158893	0.00357109	1	9	2	119395740	119395740 [954-967]	1	2219.17	N5(Deamidated): 100	5.1	13.1	7.5	10.1	6.6	7.9	8.56667	8.2	0.957198	#N/A	Unique	1.2703	High	0.003103	0.06264
ITGAV	3685	4504763	NP_002201.1	74	Yes	Yes	3	NTT	LVGAPKA	TTQPGIV	Yes	High	[K].ANTTQPGIVEGGQVLK.[C]	2xTMT6plex [N-Term; K16]; 1xDeamidated [N2(100)]	1.4949e-06	0	1	3	9	4504763	4504763 [73-88]	0	2071.18	N2(Deamidated): 100	56.2	94.7	110.8	99.7	74.9	80.8	87.2333	85.1333	0.975927	0.86	Unique	3.62257	High	0	2.783e-09
ITGAV	3685	4504763	NP_002201.1	74	Yes	Yes	3	NTT	LVGAPKA	TTQPGIV	Yes	High	[K].ANTTQPGIVEGGQVLK.[C]	1xTMT6plex [K16]; 1xDeamidated [N2(100)]	0.00089839	0	1	3	8	4504763	4504763 [73-88]	0	1842.02	N2(Deamidated): 100	13.4	34.8	35	17.3	24.5	18.5	27.7333	20.1	0.72476	0.86	Unique	2.96984	High	0	2.339e-05
ITGAV	3685	4504763	NP_002201.1	945	Yes	Yes	5	NHS	FMNKENQ	HSYSLKS	Yes	High	[K].ENQNHSYSLK.[S]	2xTMT6plex [N-Term; K10]; 2xDeamidated [N2(100); N4(100)]	0.002192	0	1	3	11	4504763	4504763 [942-951]	0	1679.86	N2(Deamidated): 100; N4(Deamidated): 100	41.7	62.2	47.6	29.4	44.9	57.7	50.5	44	0.871287	0.86	Unique	2.48827	High	0	0.002031
ITGAV	3685	4504763	NP_002201.1	945	Yes	Yes	5	NHS	FMNKENQ	HSYSLKS	Yes	High	[K].ENQNHSYSLK.[S]	1xTMT6plex [K10]; 1xDeamidated [N]	0.135388	0.00315632	1	3	3	4504763	4504763 [942-951]	0	1449.72	N4(Deamidated): 99.74	9.2	17.2	20.6	4.3	17.5	12.1	15.6667	11.3	0.721277	0.86	Unique	1.83406	High	0.0009713	0.03011
ITGAV	3685	4504763	NP_002201.1	945	Yes	Yes	5	NHS	FMNKENQ	HSYSLKS	Yes	High	[K].ENQNHSYSLK.[S]	2xTMT6plex [N-Term; K10]; 1xDeamidated [N]	6.03704e-06	0	1	3	10	4504763	4504763 [942-951]	0	1678.88	N4(Deamidated): 100	62.3	149	168.3	26.3	125.6	124.2	126.533	92.0333	0.727345	0.86	Unique	3.80065	High	0	2.315e-07
ITGAV	3685	4504763	NP_002201.1	874	Yes	Yes	11	NDT	SLQTTEK	DTVAGQG	Yes	High	[K].ISSLQTTEKNDTVAGQGER.[D]	2xTMT6plex [N-Term; K9]; 1xDeamidated [N10(100)]	0.000397542	0	1	3	3	4504763	4504763 [865-883]	1	2493.32	N10(Deamidated): 100	15	45.8	34.1	14.1	30.7	29.2	31.6333	24.6667	0.779768	0.86	Unique	2.26066	High	0	0.0002425
ITGAV	3685	4504763	NP_002201.1	874	Yes	Yes	11	NDT	SLQTTEK	DTVAGQG	Yes	High	[K].ISSLQTTEKNDTVAGQGER.[D]	1xTMT6plex [K9]; 1xDeamidated [N10(100)]	4.0162e-07	0	1	3	8	4504763	4504763 [865-883]	1	2264.16	N10(Deamidated): 100	14.4	44	36	13.3	33.3	26.9	31.4667	24.5	0.778602	0.86	Unique	3.71511	High	0	2.074e-09
ITGAV	3685	4504763	NP_002201.1	874	Yes	Yes	11	NDT	SLQTTEK	DTVAGQG	Yes	High	[K].ISSLQTTEKNDTVAGQGERDHLITK.[R]	3xTMT6plex [N-Term; K9; K25]; 1xDeamidated [N10(100)]	1.04306e-05	0	1	3	2	4504763	4504763 [865-889]	2	3429.88	N10(Deamidated): 100	5.5	12.2	15.7	10.5	7.2	16.6	11.1333	11.4333	1.02695	0.86	Unique	3.18273	High	0	0.0001518
ITGAV	3685	4504763	NP_002201.1	874	Yes	Yes	11	NDT	SLQTTEK	DTVAGQG	Yes	High	[K].ISSLQTTEKNDTVAGQGERDHLITK.[R]	2xTMT6plex [K9; K25]; 1xDeamidated [N10(100)]	0.0140648	0	1	3	4	4504763	4504763 [865-889]	2	3200.72	N10(Deamidated): 100	7.6	10.7	12.7	9.9	9.7	13.6	10.3333	11.0667	1.07097	0.86	Unique	2.1318	High	0	0.004994
ITGAV	3685	4504763	NP_002201.1	554	Yes	Yes	8	NMT	RSPSHSK	MTISRGG	Yes	High	[R].SPSHSKNMTISR.[G]	2xTMT6plex [N-Term; K6]; 1xOxidation [M8(100)]; 1xDeamidated [N7(100)]	0.000558814	0	1	3	12	4504763	4504763 [548-559]	1	1819.97	N7(Deamidated): 100; M8(Oxidation): 100	26.6	89.4	76.3	102.8	44.1	27	64.1	57.9667	0.904316	0.86	Unique	3.06922	High	0	0.001743
ITGAV	3685	4504763	NP_002201.1	615	Yes	Yes	20	NIS	LNQFTPA	ISRQAHI	Yes	High	[R].TAADTTGLQPILNQFTPANISR.[Q]	1xTMT6plex [N-Term]; 1xDeamidated [N19(100)]	1.46692e-08	0	1	3	1	4504763	4504763 [597-618]	0	2559.36	N19(Deamidated): 100	105.9	114.9	140	134.7	121.1	128.9	120.267	128.233	1.06624	0.86	Unique	6.71498	High	0	4.067e-12
ITGB1	3688	19743819	NP_391988.1	669	Yes	Yes	13	NIT	TQECSYF	ITKVESR	Yes	High	[K].KDTCTQECSYFNITK.[V]	2xCarbamidomethyl [C4; C8]; 3xTMT6plex [K1; N-Term; K15]; 1xDeamidated [N12(100)]	0.00611617	0	1	2	3	19743819	19743819 [658-672]	1	2583.3	N12(Deamidated): 100	11.7	12.5	10.5	8	17.8	21	11.5667	15.6	1.3487	#N/A	Unique	2.18302	High	0	0.0003492
ITGB1	3688	19743819	NP_391988.1	669	Yes	Yes	13	NIT	TQECSYF	ITKVESR	Yes	High	[K].KDTCTQECSYFNITK.[V]	2xCarbamidomethyl [C4; C8]; 2xTMT6plex [K1; K15]; 1xDeamidated [N12(100)]	0.214225	0.00926046	1	2	1	19743819	19743819 [658-672]	1	2354.14	N12(Deamidated): 100	12.7	8.3	8.1	8.6	9.3	7.6	9.7	8.5	0.876289	#N/A	Unique	1.08442	High	0.002989	0.05984
ITGB1	3688	19743819	NP_391988.1	212	Yes	Yes	11	NCT	NPCTSEQ	CTSPFSY	Yes	High	[K].LRNPCTSEQNCTSPFSYK.[N]	2xCarbamidomethyl [C5; C11]; 2xTMT6plex [N-Term; K18]; 1xDeamidated [N10(99.3)]	0.00289485	0	1	2	3	19743819	19743819 [203-220]	1	2648.28	N10(Deamidated): 100	12.2	18.1	18.4	6.4	14.4	18.1	16.2333	12.9667	0.798768	#N/A	Unique	2.37506	High	0	0.0009648
ITGB1	3688	19743819	NP_391988.1	212	Yes	Yes	11	NCT	NPCTSEQ	CTSPFSY	Yes	High	[K].LRNPCTSEQNCTSPFSYK.[N]	2xCarbamidomethyl [C5; C11]; 1xTMT6plex [K18]; 1xDeamidated [N]	0.106581	0.00274374	1	2	4	19743819	19743819 [203-220]	1	2419.12	N10(Deamidated): 99.61	6.2	6.1	7.3	6.3	7.6	7.7	6.53333	7.2	1.10204	#N/A	Unique	1.69324	High	0.0007256	0.02107
ITGB1	3688	19743819	NP_391988.1	406	Yes	Yes	5	NGT	SYCKNGV	GTGENGR	Yes	High	[K].NGVNGTGENGR.[K]	1xTMT6plex [N-Term]; 2xDeamidated [N9(99.4); N]	6.27321e-06	0	1	2	6	19743819	19743819 [403-413]	0	1305.62	N4(Deamidated): 100; N9(Deamidated): 100	62	73.9	108.8	96.2	108	177.2	81.5667	127.133	1.55864	#N/A	Unique	3.93292	High	0	2.103e-08
ITGB1	3688	19743819	NP_391988.1	406	Yes	Yes	5	NGT	SYCKNGV	GTGENGR	Yes	High	[K].NGVNGTGENGR.[K]	1xTMT6plex [N-Term]; 1xDeamidated [N4(99.6)]	0.0116192	0	1	2	4	19743819	19743819 [403-413]	0	1304.64	N4(Deamidated): 100	8.5	15.6	15.1	5.4	13.4	23	13.0667	13.9333	1.06633	#N/A	Unique	2.05397	High	0	0.000865
ITGB1	3688	19743819	NP_391988.1	406	Yes	Yes	5	NGT	SYCKNGV	GTGENGR	Yes	High	[K].NGVNGTGENGRK.[C]	2xTMT6plex [N-Term; K12]; 2xDeamidated [N9(100); N]	0.000693417	0	1	2	4	19743819	19743819 [403-414]	1	1662.88	N4(Deamidated): 100; N9(Deamidated): 100	40.1	60.2	71.3	54.6	59.1	100.2	57.2	71.3	1.2465	#N/A	Unique	2.78333	High	0	1.615e-05
ITGB1	3688	19743819	NP_391988.1	406	Yes	Yes	5	NGT	SYCKNGV	GTGENGR	Yes	High	[K].NGVNGTGENGRK.[C]	1xTMT6plex [K12]; 3xDeamidated [N1(100); N4(100); N9(100)]	0.00893089	0	1	2	15	19743819	19743819 [403-414]	1	1434.7	N1(Deamidated): 100; N4(Deamidated): 100; N9(Deamidated): 100	80.5	136.3	176.7	124.8	170.8	207	131.167	167.533	1.27726	#N/A	Unique	3.02563	High	0	0.002824
ITGB1	3688	19743819	NP_391988.1	406	Yes	Yes	5	NGT	SYCKNGV	GTGENGR	Yes	High	[K].NGVNGTGENGRK.[C]	1xTMT6plex [K12]; 2xDeamidated [N4(100); N9(100)]	0.00268106	0	1	2	16	19743819	19743819 [403-414]	1	1433.72	N4(Deamidated): 100; N9(Deamidated): 100	45.1	97.5	79.8	80.7	72	112.5	74.1333	88.4	1.19245	#N/A	Unique	3.49838	High	0	0.0001091
ITGB1	3688	19743819	NP_391988.1	406	Yes	Yes	9	NGT	SYCKNGV	GTGENGR	Yes	High	[K].SYCKNGVNGTGENGR.[K]	1xCarbamidomethyl [C3]; 2xTMT6plex [N-Term; K4]; 3xDeamidated [N5(100); N8(100); N13(100)]	0.0852277	0.00222925	1	2	1	19743819	19743819 [399-413]	1	2073.99	N5(Deamidated): 100; N8(Deamidated): 100; N13(Deamidated): 100	19.1	18.1	21.7	6.3	24.3	29.9	19.6333	20.1667	1.02716	#N/A	Unique	1.53589	High	0.0005939	0.01521
ITGB3	3690	47078292	NP_000203.2	125	Yes	Yes	9	NFS	LRPDDSK	FSIQVRQ	Yes	High	[R].LRPDDSKNFSIQVR.[Q]	1xTMT6plex [K7]; 1xDeamidated [N8(100)]	0.00165978	0	1	1	5	47078292	47078292 [118-131]	1	1905.04	N8(Deamidated): 100	7.7	5.9	22.3	19.1	9.8	9.3	11.9667	12.7333	1.06407	0.89	Unique	2.09351	High	0	7.414e-05
ITGB3	3690	47078292	NP_000203.2	125	Yes	Yes	9	NFS	LRPDDSK	FSIQVRQ	Yes	High	[R].LRPDDSKNFSIQVR.[Q]	2xTMT6plex [N-Term; K7]; 1xDeamidated [N8(100)]	1.02324e-05	0	1	1	7	47078292	47078292 [118-131]	1	2134.2	N8(Deamidated): 100	14.7	10.4	55.8	52.6	24.2	12.2	26.9667	29.6667	1.10012	0.89	Unique	2.73069	High	0	9.592e-07
ITGB4	3691	767994639	XP_011523054.1	705	Yes	Yes	11	NST	KTLSPTG	ISSAPKD	No	High	[-].MEGDGAPGPNSTVLVHK.[K]	1xTMT6plex [K17]; 1xOxidation [M1(100)]; 1xDeamidated [N10(100)]	0.000274788	0	1	1	3	767994639	767994639 [1-17]	0	1954.97	M1(Oxidation): 100; N10(Deamidated): 100	9.5	21.8	9.8	9.1	6.3	11.6	13.7	9	0.656934	#N/A	Unique	2.76362	High	0	4.378e-06
ITGB6	3694	9625002	NP_000879.2	463	Yes	Yes	6	NSS	CQKEVEV	SSKCHHG	No	High	[K].EVEVNSSK.[C]	2xTMT6plex [N-Term; K8]; 1xDeamidated [N5(100)]	0.0137989	0	1	6	8	9625002	9625002 [459-466]	0	1350.75	N5(Deamidated): 100	22.2	853.7	14.4	16.4	14	22.1	296.767	17.5	0.0589689	#N/A	Unique	3.44636	High	0	0.004306
ITGB6	3694	9625002	NP_000879.2	463	Yes	Yes	6	NSS	CQKEVEV	SSKCHHG	No	High	[K].EVEVNSSK.[C]	1xTMT6plex [K8]; 1xDeamidated [N5(100)]	0.0417546	0	1	6	3	9625002	9625002 [459-466]	0	1121.59	N5(Deamidated): 100	8.3	35.1	8.9	8.7	11	9.6	17.4333	9.76667	0.560229	#N/A	Unique	1.90066	High	0	0.0054
ITGB6	3694	9625002	NP_000879.2	97	Yes	Yes	4	NSS	LSVGRQK	SSDIVQI	No	High	[R].QKNSSDIVQIAPQSLILK.[L]	3xTMT6plex [N-Term; K2; K18]; 1xDeamidated [N3(100)]	1.46671e-07	0	1	3	7	9625002	9625002 [95-112]	1	2670.6	N3(Deamidated): 100	12.6	75.8	7.4	10.8	8.4	11.6	31.9333	10.2667	0.321503	#N/A	Unique	4.0134	High	0	1.049e-10
ITGB6	3694	9625002	NP_000879.2	97	Yes	Yes	4	NSS	LSVGRQK	SSDIVQI	No	High	[R].QKNSSDIVQIAPQSLILK.[L]	2xTMT6plex [K2; K18]; 1xDeamidated [N3(100)]	0.0108151	0	1	3	4	9625002	9625002 [95-112]	1	2441.44	N3(Deamidated): 100	15.4	28.7	19.5	22.7	13.9	12.5	21.2	16.3667	0.772013	#N/A	Unique	2.233	High	0	0.0007841
ITGB8	3696	1034655518	XP_016867668.1	456	Yes	Yes	12	NET	IIKPIGF	ETAKIHI	No	High	[K].NYAIIKPIGFNETAK.[I]	3xTMT6plex [N-Term; K6; K15]; 1xDeamidated [N11(100)]	0.00744448	0	1	4	2	1034655518	1034655518 [446-460]	0	2367.39	N11(Deamidated): 100	11.5	11.8	7.8	16.8	39.3	14.1	10.3667	23.4	2.25723	#N/A	Unique	1.64297	High	0	0.0004618
ITGB8	3696	1034655518	XP_016867668.1	456	Yes	Yes	12	NET	IIKPIGF	ETAKIHI	No	High	[K].NYAIIKPIGFNETAK.[I]	2xTMT6plex [K6; K15]; 1xDeamidated [N11(100)]	0.000512597	0	1	4	2	1034655518	1034655518 [446-460]	0	2138.23	N11(Deamidated): 100	10.7	9.2	5.5	11.3	30.5	7.7	8.46667	16.5	1.94882	#N/A	Unique	2.6522	High	0	1.057e-05
ITPRIP	85450	530394567	XP_005270314.1	32	Yes	Yes	3	NAT	PLLFPRE	ATVPENE	No	High	[R].ENATVPENEEEIIR.[K]	1xTMT6plex [N-Term]; 1xDeamidated [N2(100)]	3.02582e-06	0	1	2	8	530394567	530394567 [31-44]	0	1872.94	N2(Deamidated): 100	25	41.1	23.2	14	25	30.9	29.7667	23.3	0.782755	1.12	Unique	3.24987	High	0	3.801e-07
ITPRIP	85450	530394567	XP_005270314.1	32	Yes	Yes	3	NAT	PLLFPRE	ATVPENE	No	High	[R].ENATVPENEEEIIRK.[M]	2xTMT6plex [N-Term; K15]; 1xDeamidated [N8(99.7)]	0.00474369	0	1	2	3	530394567	530394567 [31-45]	1	2230.2	N8(Deamidated): 99.67	30.1	52.9	35	20.1	28.5	42	39.3333	30.2	0.767797	1.12	Unique	2.05419	High	0	0.0002452
KDELC1	79070	176866369	NP_076994.2	414	Yes	Yes	3	NLS	HYIPVKS	LSDLLEK	No	High	[K].SNLSDLLEK.[L]	2xTMT6plex [N-Term; K9]; 1xDeamidated [N2(100)]	0.0111832	0	1	3	3	176866369	176866369 [413-421]	0	1477.85	N2(Deamidated): 100	18.1	14.8	12.8	26.4	26.1	25.1	15.2333	25.8667	1.69803	#N/A	Unique	1.78026	High	0.0005939	0.01742
KDELC1	79070	176866369	NP_076994.2	414	Yes	Yes	3	NLS	HYIPVKS	LSDLLEK	No	High	[K].SNLSDLLEK.[L]	1xTMT6plex [K9]; 1xDeamidated [N2(100)]	0.0570592	0.000598249	1	3	1	176866369	176866369 [413-421]	0	1248.69	N2(Deamidated): 100	9.9	5.4	6.4	5.2	13.6	13.1	7.23333	10.6333	1.47005	#N/A	Unique	1.75474	High	0.000164	0.008467
KDELC2	143888	153218487	NP_714916.3	306	Yes	Yes	20	NKT	NTGPSWI	KTERAFF	Yes	High	[R].GVTNDLLSIQGNTGPSWINKTER.[A]	2xTMT6plex [N-Term; K20]; 1xDeamidated [N19(100)]	4.31519e-06	0	1	2	7	153218487	153218487 [288-310]	1	2959.59	N19(Deamidated): 100	12.5	4.6	8.7	8.9	13.5	23.9	8.6	15.4333	1.79457	1.35	Unique	3.5143	High	0	1.244e-08
KDELC2	143888	153218487	NP_714916.3	61	Yes	Yes	14	NLT	AVNSEGQ	LTRSPAG	Yes	High	[R].YFYLQAVNSEGQNLTR.[S]	1xTMT6plex [N-Term]; 2xDeamidated [N8(100); N13(100)]	0.115645	0.00315632	1	2	1	153218487	153218487 [49-64]	0	2134.07	N8(Deamidated): 100; N13(Deamidated): 100	5.9		3.6	3.3	5.3	6.9	4.75	5.16667	1.08772	1.35	Unique	1.11179	High	0.00084	0.02376
KDELC2	143888	153218487	NP_714916.3	61	Yes	Yes	14	NLT	AVNSEGQ	LTRSPAG	Yes	High	[R].YFYLQAVNSEGQNLTR.[S]	1xTMT6plex [N-Term]; 1xDeamidated [N]	1.37104e-05	0	1	2	8	153218487	153218487 [49-64]	0	2133.08	N13(Deamidated): 100	12	7.5	12.8	13	12.8	22.9	10.7667	16.2333	1.50774	1.35	Unique	3.52312	High	0	1.608e-07
KIAA0319L	79932	1034561947	XP_016857855.1	395	Yes	Yes	16	NVT	AHGEGYV	VTVKPEP	No	High	[K].VIVEGQNAHGEGYVNVTVKPEPR.[K]	2xTMT6plex [N-Term; K19]; 1xDeamidated [N15(100)]	2.09231e-09	0	1	8	4	1034561947	1034561947 [381-403]	0	2951.6	N15(Deamidated): 100	17.1	12.3	11.7	9.1	14	13.9	13.7	12.3333	0.900243	#N/A	Unique	3.75433	High	0	1.889e-12
L1CAM	3897	4557707	NP_000416.1	671	Yes	Yes	5	NQT	SLGKVPG	QTSTTLK	Yes	High	[K].VPGNQTSTTLK.[L]	2xTMT6plex [N-Term; K11]; 1xDeamidated [N4(100)]	0.00376844	0	1	3	7	4557707	4557707 [668-678]	0	1604.93	N4(Deamidated): 100	15.4	11.2	100.4	42.3	15.5	23	42.3333	26.9333	0.63622	0.85	Unique	2.76475	High	0	0.0002016
L1CAM	3897	4557707	NP_000416.1	671	Yes	Yes	5	NQT	SLGKVPG	QTSTTLK	Yes	High	[K].VPGNQTSTTLK.[L]	1xTMT6plex [K11]; 1xDeamidated [N4(100)]	0.0180183	0	1	3	5	4557707	4557707 [668-678]	0	1375.76	N4(Deamidated): 100	24.6	13.7	34.2	27.3	21.6	18.3	24.1667	22.4	0.926897	0.85	Unique	2.47524	High	0	0.001619
L1CAM	3897	4557707	NP_000416.1	671	Yes	Yes	11	NQT	SLGKVPG	QTSTTLK	Yes	High	[K].WYSLGKVPGNQTSTTLK.[L]	3xTMT6plex [N-Term; K6; K17]; 1xDeamidated [N10(100)]	0.0209768	0	1	3	1	4557707	4557707 [662-678]	1	2568.46	N10(Deamidated): 100	8.5	5.7	29	26.8	8.7	15.2	14.4	16.9	1.17361	0.85	Unique	2.12439	High	0	0.002012
L1CAM	3897	4557707	NP_000416.1	490	Yes	Yes	6	NDT	GIRDLQA	DTGRYFC	Yes	High	[R].DLQANDTGR.[Y]	1xTMT6plex [N-Term]; 1xDeamidated [N5(100)]	0.000933527	0	1	3	8	4557707	4557707 [486-494]	0	1219.61	N5(Deamidated): 100	17.4	14.1	103.4	82.1	18.3	28.8	44.9667	43.0667	0.957746	0.85	Unique	2.6835	High	0	2.46e-05
L1CAM	3897	4557707	NP_000416.1	849	Yes	Yes	4	NVT	KGHLRGY	VTYWREG	Yes	High	[R].GYNVTYWR.[E]	1xTMT6plex [N-Term]; 1xDeamidated [N3(100)]	0.107553	0.00274374	1	3	1	4557707	4557707 [847-854]	0	1288.65	N3(Deamidated): 100	7.7	4.5	81.5	81.9	7.4	14.7	31.2333	34.6667	1.10993	0.85	Unique	2.03786	High	0.0007256	0.02134
L1CAM	3897	4557707	NP_000416.1	1105	Yes	Yes	9	NGT	HQMAVKT	GTGRVRL	Yes	High	[R].HQMAVKTNGTGR.[V]	1xTMT6plex [K6]; 1xOxidation [M3(100)]; 1xDeamidated [N8(100)]	0.156802	0.00357109	1	3	2	4557707	4557707 [1098-1109]	1	1545.8	M3(Oxidation): 100; N8(Deamidated): 100	7.6	4.9	12.9	60.5	5.4	10.7	8.46667	25.5333	3.01575	0.85	Unique	1.20423	High	0.001331	0.03732
L1CAM	3897	4557707	NP_000416.1	979	Yes	Yes	4	NLT	DPELRTH	LTDLSPH	Yes	High	[R].THNLTDLSPHLR.[Y]	1xTMT6plex [N-Term]; 1xDeamidated [N3(100)]	0.00558362	0	1	3	3	4557707	4557707 [977-988]	0	1633.89	N3(Deamidated): 100	4.1	4.4	5.2	5.3	2.8	5.9	4.56667	4.66667	1.0219	0.85	Unique	2.27282	High	0	0.0003076
L1CAM	3897	4557707	NP_000416.1	294	Yes	Yes	8	NKT	RVTYQNH	KTLQLLK	Yes	High	[R].VTYQNHNK.[T]	1xTMT6plex [K8]; 1xDeamidated [N7(100)]	0.0288037	0	1	3	4	4557707	4557707 [288-295]	0	1233.64	N7(Deamidated): 100	8.9	6.3	36.2	17.1	8.2	11.3	17.1333	12.2	0.712062	0.85	Unique	2.15958	High	0.000164	0.008667
L1CAM	3897	4557707	NP_000416.1	294	Yes	Yes	8	NKT	RVTYQNH	KTLQLLK	Yes	High	[R].VTYQNHNK.[T]	2xTMT6plex [N-Term; K8]; 1xDeamidated [N7(100)]	0.0364473	0	1	3	2	4557707	4557707 [288-295]	0	1462.81	N7(Deamidated): 100	8		61.8	31.8	8.8	8.4	34.9	16.3333	0.468004	0.85	Unique	2.00499	High	0	0.004436
LAMA3	3909	767998701	XP_011524280.1	2274	Yes	Yes	7	NLT	QKEVIDT	LTTLRDG	No	High	[K].EVIDTNLTTLR.[D]	1xTMT6plex [N-Term]; 1xDeamidated [N6(100)]	0.0334909	0	1	10	4	767998701	767998701 [2269-2279]	0	1504.84	N6(Deamidated): 100	18.6	8.4	25	9.5	13.2	9.9	17.3333	10.8667	0.626923	#N/A	Unique	2.01684	High	0	0.003912
LAMA3	3909	767998701	XP_011524280.1	2760	Yes	Yes	3	NDT	TSGVVRL	DTVGVTK	No	High	[R].LNDTVGVTK.[K]	2xTMT6plex [N-Term; K9]; 1xDeamidated [N2(100)]	0.143484	0.00357109	1	11	2	767998701	767998701 [2759-2767]	0	1405.83	N2(Deamidated): 100	26.9	9.8	29.5	12.4	14.3	14.5	22.0667	13.7333	0.622356	#N/A	Unique	1.43241	High	0.001331	0.03271
LAMA4	3910	578812747	XP_005267041.2	810	Yes	Yes	6	NVS	EQKRPAS	VSASIQR	Yes	High	[K].RPASNVSASIQR.[I]	1xTMT6plex [N-Term]; 1xDeamidated [N5(100)]	0.0263316	0	1	2	4	578812747	578812747 [806-817]	0	1515.84	N5(Deamidated): 100	6.9	3.7	4.7	14.6	7.2	9.3	5.1	10.3667	2.03268	#N/A	Unique	1.51403	High	0.000164	0.008814
LAMA4	3910	578812747	XP_005267041.2	315	Yes	Yes	7	NAT	HRHVNEI	ATIYLLK	Yes	High	[R].HVNEINATIYLLK.[T]	2xTMT6plex [N-Term; K13]; 1xDeamidated [N6(100)]	1.04306e-05	0	1	2	3	578812747	578812747 [310-322]	0	1987.16	N6(Deamidated): 100	5.7	4.1	2.8	20.8	4.4	6.7	4.2	10.6333	2.53175	#N/A	Unique	2.5902	High	0	1.969e-06
LAMA4	3910	578812747	XP_005267041.2	742	Yes	Yes	8	NRT	RLITEEA	RTTMEVQ	Yes	High	[R].LITEEANR.[T]	1xTMT6plex [N-Term]; 1xDeamidated [N7(100)]	0.193348	0.00742786	1	2	1	578812747	578812747 [736-743]	0	1175.65	N7(Deamidated): 100	18.8	14.1	7.2	30	13.1	12	13.3667	18.3667	1.37406	#N/A	Unique	1.7612	High	0.002301	0.05134
LAMA4	3910	578812747	XP_005267041.2	531	Yes	Yes	10	NMS	REQMEVV	MSLSTSA	Yes	High	[R].VREQMEVVNMSLSTSADSLTTPR.[L]	1xTMT6plex [N-Term]; 2xOxidation [M5(100); M10(100)]; 1xDeamidated [N9(100)]	0.0010275	0	1	2	7	578812747	578812747 [523-545]	1	2813.39	M5(Oxidation): 100; N9(Deamidated): 100; M10(Oxidation): 100	5.8	9.3	5.2	22.3	6	4.5	6.76667	10.9333	1.61576	#N/A	Unique	3.08381	High	0	0.0001408
LAMA5	3911	578835999	XP_006723859.1	95	Yes	Yes	13	NQT	PVAGGDP	QTIRGQY	Yes	High	[K].LVGGPVAGGDPNQTIR.[G]	1xTMT6plex [N-Term]; 1xDeamidated [N12(100)]	0.000356022	0	1	5	5	578835999	578835999 [84-99]	0	1780.98	N12(Deamidated): 100	20.3	16.8	20.5	10.1	19.5	15.4	19.2	15	0.78125	#N/A	Unique	2.08617	High	0	0.0004426
LAMA5	3911	578835999	XP_006723859.1	2568	Yes	Yes	8	NST	RAQQLLA	STALEEA	Yes	High	[R].AQQLLANSTALEEAMLQEQQR.[L]	1xTMT6plex [N-Term]; 1xOxidation [M15(100)]; 1xDeamidated [N7(100)]	7.14792e-13	0	1	4	9	578835999	578835999 [2562-2582]	0	2618.33	N7(Deamidated): 100; M15(Oxidation): 100	18.1	14.6	16.1	22.2	18.5	18.1	16.2667	19.6	1.20492	#N/A	Unique	6.46118	High	0	3.317e-18
LAMA5	3911	578835999	XP_006723859.1	2423	Yes	Yes	3	NAT	KQELSRD	ATLQATL	Yes	High	[R].DNATLQATLHAAR.[D]	1xTMT6plex [N-Term]; 1xDeamidated [N2(100)]	0.000734494	0	1	4	3	578835999	578835999 [2422-2434]	0	1611.87	N2(Deamidated): 100	6.1	4.3	5.8	3.2	5.1	5.1	5.4	4.46667	0.82716	#N/A	Unique	2.88191	High	0	1.758e-05
LAMA5	3911	578835999	XP_006723859.1	2707	Yes	Yes	5	NAS	LENRGVH	ASLALSA	Yes	High	[R].GVHNASLALSASIGR.[V]	1xTMT6plex [N-Term]; 1xDeamidated [N4(100)]	0.000100843	0	1	4	4	578835999	578835999 [2704-2718]	0	1682.94	N4(Deamidated): 100	3.9	3.6	2.9	4.1	2.7	4.2	3.46667	3.66667	1.05769	#N/A	Unique	2.46165	High	0	1.911e-06
LAMA5	3911	578835999	XP_006723859.1	2209	Yes	Yes	3	NAS	WARLHRL	ASIADLQ	Yes	High	[R].LNASIADLQSQLR.[S]	1xTMT6plex [N-Term]; 1xDeamidated [N2(100)]	6.70993e-07	0	1	5	5	578835999	578835999 [2208-2220]	0	1658.93	N2(Deamidated): 100	40.6	28.6	40.3	15.1	32.4	24	36.5	23.8333	0.652968	#N/A	Unique	3.24966	High	0	8.977e-10
LAMA5	3911	578835999	XP_006723859.1	2303	Yes	Yes	17	NAS	TGHLGLA	ASAPSGE	Yes	High	[R].TLSELMSQTGHLGLANASAPSGEQLLR.[T]	1xTMT6plex [N-Term]; 1xOxidation [M6(100)]; 1xDeamidated [N16(100)]	0.000142438	0	1	4	3	578835999	578835999 [2288-2314]	0	3027.56	M6(Oxidation): 100; N16(Deamidated): 100	5.4	5.1	5	4.3	6	5.7	5.16667	5.33333	1.03226	#N/A	Unique	2.90261	High	0	1.736e-06
LAMB1	3912	1034655603	XP_016867690.1	701	Yes	Yes	4	NYT	VCFEKGT	YTVRLEL	No	High	[K].GTNYTVR.[L]	1xTMT6plex [N-Term]; 1xDeamidated [N3(100)]	0.217883	0.00926046	1	3	1	1034655603	1034655603 [699-705]	0	1040.56	N3(Deamidated): 100	125.2	52.4	22.8	41.6	37.1	47.3	66.8	42	0.628743	1.06	Unique	1.73614	High	0.002989	0.0616
LAMB1	3912	1034655603	XP_016867690.1	1303	Yes	Yes	10	NST	SDTTSQS	STAKELD	No	High	[K].LSDTTSQSNSTAK.[E]	1xTMT6plex [K13]; 1xDeamidated [N9(100)]	0.000134471	0	1	2	14	1034655603	1034655603 [1295-1307]	0	1569.78	N9(Deamidated): 100	131.3	75	37.1	64.3	70.2	60.6	81.1333	65.0333	0.801561	1.06	Unique	4.15696	High	0	1.594e-06
LAMB1	3912	1034655603	XP_016867690.1	1303	Yes	Yes	10	NST	SDTTSQS	STAKELD	No	High	[K].LSDTTSQSNSTAK.[E]	2xTMT6plex [N-Term; K13]; 1xDeamidated [N9(100)]	5.69842e-05	0	1	2	8	1034655603	1034655603 [1295-1307]	0	1798.94	N9(Deamidated): 100	129.2	59.9	29.8	66.7	45.5	67.2	72.9667	59.8	0.819552	1.06	Unique	4.78565	High	0	2.204e-06
LAMB1	3912	1034655603	XP_016867690.1	1360	Yes	Yes	3	NAS	LEAEERV	ASTTEPN	No	High	[R].VNASTTEPNSTVEQSALMR.[D]	1xTMT6plex [N-Term]; 1xOxidation [M18(100)]; 2xDeamidated [N2(100); N9(100)]	0.00357483	0	1	2	6	1034655603	1034655603 [1359-1377]	0	2282.1	N2(Deamidated): 100; N9(Deamidated): 100; M18(Oxidation): 100	14.9	11	9.1	13.2	8.1	10.8	11.6667	10.7	0.917143	1.06	Unique	2.25288	High	0	0.005627
LAMB1	3912	1034655603	XP_016867690.1	1360	Yes	Yes	3	NAS	LEAEERV	ASTTEPN	No	High	[R].VNASTTEPNSTVEQSALMR.[D]	1xTMT6plex [N-Term]; 1xOxidation [M18(100)]; 1xDeamidated [N2(100)]	2.4856e-06	0	1	2	2	1034655603	1034655603 [1359-1377]	0	2281.12	N2(Deamidated): 100; M18(Oxidation): 100	12.2	11.9	6.6	12.9	6.1	6.3	10.2333	8.43333	0.824104	1.06	Unique	3.60815	High	0	5.694e-09
LAMB2	3913	119703755	NP_002283.3	1348	Yes	Yes	3	NTS	AEAERRA	TSALAVP	Yes	High	[R].ANTSALAVPSPVSNSASAR.[H]	1xTMT6plex [N-Term]; 2xDeamidated [N2(100); N14(100)]	0.000347586	0	1	1	3	119703755	119703755 [1347-1365]	0	2031.06	N2(Deamidated): 100; N14(Deamidated): 100	8.5	5.5	6.6	17.8	6.1	8.6	6.86667	10.8333	1.57767	1.05	Unique	2.10266	High	0	6.123e-06
LAMB2	3913	119703755	NP_002283.3	1348	Yes	Yes	3	NTS	AEAERRA	TSALAVP	Yes	High	[R].ANTSALAVPSPVSNSASAR.[H]	1xTMT6plex [N-Term]; 1xDeamidated [N2(100)]	5.67115e-05	0	1	1	6	119703755	119703755 [1347-1365]	0	2030.07	N2(Deamidated): 100	10.6	8.1	15.5	15.3	10.9	10.7	11.4	12.3	1.07895	1.05	Unique	3.203	High	0	4.727e-07
LAMB2	3913	119703755	NP_002283.3	1499	Yes	Yes	10	NAS	QAALDKA	ASRGQVE	Yes	High	[R].AQAALDKANASR.[G]	2xTMT6plex [N-Term; K7]; 1xDeamidated [N9(100)]	0.176532	0.00554469	1	1	1	119703755	119703755 [1491-1502]	1	1674.95	N9(Deamidated): 100	14.6	14.7	32.8	35.4	20	31	20.7	28.8	1.3913	1.05	Unique	1.40161	High	0.001833	0.04461
LAMB2	3913	119703755	NP_002283.3	1348	Yes	Yes	4	NTS	AEAERRA	TSALAVP	Yes	High	[R].RANTSALAVPSPVSNSASAR.[H]	1xTMT6plex [N-Term]; 2xDeamidated [N3(100); N15(100)]	8.32527e-06	0	1	1	4	119703755	119703755 [1346-1365]	1	2187.16	N3(Deamidated): 100; N15(Deamidated): 100	11.4	9.8	7.6	14.4	8.1	13.5	9.6	12	1.25	1.05	Unique	2.90223	High	0	3.133e-08
LAMC1	3915	145309326	NP_002284.3	650	Yes	Yes	5	NLT	EFQKLLN	LTSIKIR	Yes	High	[K].LLNNLTSIK.[I]	2xTMT6plex [N-Term; K9]; 2xDeamidated [N3(100); N4(100)]	0.000189027	0	1	1	4	145309326	145309326 [647-655]	0	1475.91	N3(Deamidated): 100; N4(Deamidated): 100	46.5	11.2	15.8	49.7	23	29.8	24.5	34.1667	1.39456	1.1	Unique	2.85635	High	0	4.314e-06
LAMC1	3915	145309326	NP_002284.3	650	Yes	Yes	5	NLT	EFQKLLN	LTSIKIR	Yes	High	[K].LLNNLTSIK.[I]	2xTMT6plex [N-Term; K9]; 1xDeamidated [N]	0.00147226	0	1	1	5	145309326	145309326 [647-655]	0	1474.92	N4(Deamidated): 100	140.7	56.6	70	126.9	72.3	116.1	89.1	105.1	1.17957	1.1	Unique	3.6414	High	0	5.773e-05
LAMC1	3915	145309326	NP_002284.3	650	Yes	Yes	5	NLT	EFQKLLN	LTSIKIR	Yes	High	[K].LLNNLTSIK.[I]	1xTMT6plex [K9]; 1xDeamidated [N4(99.7)]	0.0151077	0	1	1	6	145309326	145309326 [647-655]	0	1245.76	N4(Deamidated): 99.79	19.9	7.4	12.1	16.1	12.2	16	13.1333	14.7667	1.12437	1.1	Unique	2.3593	High	0	0.002279
LAMC1	3915	145309326	NP_002284.3	1439	Yes	Yes	2	NAT	IASAVQK	ATSTKAE	Yes	High	[K].NATSTKAEAER.[T]	1xTMT6plex [K6]; 1xDeamidated [N1(100)]	0.00278591	0	1	1	4	145309326	145309326 [1439-1449]	1	1407.73	N1(Deamidated): 100	7.1	4.4	4.6	21	4.3	6.9	5.36667	10.7333	2	1.1	Unique	1.67308	High	0	0.0001156
LAMC1	3915	145309326	NP_002284.3	1241	Yes	Yes	2	NIS	RKYEQAK	ISQDLEK	Yes	High	[K].NISQDLEK.[Q]	1xTMT6plex [K8]; 1xDeamidated [N1(100)]	0.174236	0.00554469	1	1	1	145309326	145309326 [1241-1248]	0	1176.63	N1(Deamidated): 100	17.5	8.1	9.1	13.6	9.4	11.7	11.5667	11.5667	1	1.1	Unique	1.51677	High	0.001833	0.04395
LAMC1	3915	145309326	NP_002284.3	1205	Yes	Yes	4	NDT	VRVAKTA	DTSTEAY	Yes	High	[K].TANDTSTEAYNLLLR.[T]	1xTMT6plex [N-Term]; 1xDeamidated [N3(100)]	1.45249e-06	0	1	1	4	145309326	145309326 [1203-1217]	0	1911.99	N3(Deamidated): 100	6.8	3.5	3.2	4.6	4	5.4	4.5	4.66667	1.03704	1.1	Unique	3.87011	High	0	2.681e-09
LAMC1	3915	145309326	NP_002284.3	1161	Yes	Yes	6	NVS	KAKVAAA	VSVTQPE	Yes	High	[K].VAAANVSVTQPESTGDPNNMTLLAEEAR.[K]	1xTMT6plex [N-Term]; 1xOxidation [M20(100)]; 2xDeamidated [N5(100); N19(99.6)]	2.34691e-07	0	1	1	5	145309326	145309326 [1157-1184]	0	3132.52	N5(Deamidated): 100; N19(Deamidated): 99.56; M20(Oxidation): 100	11.2	4.7	9.9	9.7	8	13.6	8.6	10.4333	1.21318	1.1	Unique	3.48414	High	0	2.045e-10
LAMC1	3915	145309326	NP_002284.3	1439	Yes	Yes	9	NAT	IASAVQK	ATSTKAE	Yes	High	[R].IASAVQKNATSTK.[A]	3xTMT6plex [N-Term; K7; K13]; 1xDeamidated [N8(100)]	0.0692993	0.00117085	1	1	1	145309326	145309326 [1432-1444]	1	2007.21	N8(Deamidated): 100	20.2	10.2	11.9	60.9	13.6	22.4	14.1	32.3	2.29078	1.1	Unique	1.33003	High	0.0003202	0.01123
LAMC1	3915	145309326	NP_002284.3	1439	Yes	Yes	9	NAT	IASAVQK	ATSTKAE	Yes	High	[R].IASAVQKNATSTK.[A]	2xTMT6plex [K7; K13]; 1xDeamidated [N8(100)]	3.46024e-05	0	1	1	5	145309326	145309326 [1432-1444]	1	1778.04	N8(Deamidated): 100	14.3	12.8	15.6	44.8	17	17.4	14.2333	26.4	1.8548	1.1	Unique	3.47585	High	0	2.346e-07
LAMC1	3915	145309326	NP_002284.3	1439	Yes	Yes	9	NAT	IASAVQK	ATSTKAE	Yes	High	[R].IASAVQKNATSTKAEAER.[T]	2xTMT6plex [K7; K13]; 1xDeamidated [N8(100)]	0.00766164	0	1	1	3	145309326	145309326 [1432-1449]	2	2334.3	N8(Deamidated): 100	9.3	10.5	8.9	55.4	8.4	8.8	9.56667	24.2	2.52962	1.1	Unique	1.39888	High	0	0.000482
LAMC1	3915	145309326	NP_002284.3	1395	Yes	Yes	7	NQT	LRKIPAI	QTITEAN	Yes	High	[R].KIPAINQTITEANEK.[T]	3xTMT6plex [K1; N-Term; K15]; 2xDeamidated [N6(100); N13(100)]	0.000106817	0	1	1	5	145309326	145309326 [1390-1404]	1	2359.37	N6(Deamidated): 100; N13(Deamidated): 100	24.6	9.7	12.9	23.2	16	19.7	15.7333	19.6333	1.24788	1.1	Unique	2.82979	High	0	1.157e-06
LAMC1	3915	145309326	NP_002284.3	1395	Yes	Yes	7	NQT	LRKIPAI	QTITEAN	Yes	High	[R].KIPAINQTITEANEK.[T]	3xTMT6plex [K1; N-Term; K15]; 1xDeamidated [N6(100)]	9.52478e-08	0	1	1	11	145309326	145309326 [1390-1404]	1	2358.38	N6(Deamidated): 100	77.9	26.4	30.9	76.9	35.9	52.9	45.0667	55.2333	1.22559	1.1	Unique	4.50725	High	0	2.761e-09
LAMC1	3915	145309326	NP_002284.3	1395	Yes	Yes	7	NQT	LRKIPAI	QTITEAN	Yes	High	[R].KIPAINQTITEANEK.[T]	2xTMT6plex [K1; K15]; 1xDeamidated [N6(100)]	0.000597623	0	1	1	2	145309326	145309326 [1390-1404]	1	2129.22	N6(Deamidated): 100	11.3	9.3	8.8	11.9	11	9.8	9.8	10.9	1.11224	1.1	Unique	2.03012	High	0	1.31e-05
LAMC1	3915	145309326	NP_002284.3	1241	Yes	Yes	8	NIS	RKYEQAK	ISQDLEK	Yes	High	[R].KYEQAKNISQDLEK.[Q]	4xTMT6plex [K1; N-Term; K6; K14]; 1xDeamidated [N7(100)]	0.0134094	0	1	1	2	145309326	145309326 [1235-1248]	2	2611.51	N7(Deamidated): 100	10.6	7.3	7.9	72.5	6.1	8.1	8.6	28.9	3.36047	1.1	Unique	1.45648	High	0	0.001063
LAMC1	3915	145309326	NP_002284.3	1380	Yes	Yes	6	NKT	FDRRVND	KTAAEEA	Yes	High	[R].RVNDNKTAAEEALR.[K]	2xTMT6plex [N-Term; K6]; 1xDeamidated [N]	0.0445796	0	1	1	1	145309326	145309326 [1376-1389]	2	2046.13	N5(Deamidated): 99.6	9.8	3.6	4.9	12.8	6.4	6.6	6.1	8.6	1.40984	1.1	Unique	1.18301	High	0	0.005917
LAMC1	3915	145309326	NP_002284.3	1223	Yes	Yes	7	NQT	LRTLAGE	QTAFEIE	Yes	High	[R].TLAGENQTAFEIEELNR.[K]	1xTMT6plex [N-Term]; 1xDeamidated [N6(100)]	1.57774e-14	0	1	1	11	145309326	145309326 [1218-1234]	0	2165.09	N6(Deamidated): 100	123.9	68.8	70.1	185.8	77.6	94.5	87.6	119.3	1.36187	1.1	Unique	6.09099	High	0	1.529e-20
LAMC1	3915	145309326	NP_002284.3	1223	Yes	Yes	7	NQT	LRTLAGE	QTAFEIE	Yes	High	[R].TLAGENQTAFEIEELNRK.[Y]	1xTMT6plex [K18]; 1xDeamidated [N16(99.6)]	0.0623118	0.000598249	1	1	1	145309326	145309326 [1218-1235]	1	2293.19	N6(Deamidated): 100	11.2	5.2	6.3	11.9	10.5	9.9	7.56667	10.7667	1.42291	1.1	Unique	1.64004	High	0.000164	0.00964
LAMC1	3915	145309326	NP_002284.3	1380	Yes	Yes	5	NKT	FDRRVND	KTAAEEA	Yes	High	[R].VNDNKTAAEEALR.[K]	1xTMT6plex [K5]; 1xDeamidated [N]	0.00360927	0	1	1	6	145309326	145309326 [1377-1389]	1	1660.87	N4(Deamidated): 100	37	17.4	33.4	40.5	30.2	21	29.2667	30.5667	1.04442	1.1	Unique	2.83774	High	0	0.0001665
LAMC1	3915	145309326	NP_002284.3	1380	Yes	Yes	5	NKT	FDRRVND	KTAAEEA	Yes	High	[R].VNDNKTAAEEALR.[K]	2xTMT6plex [N-Term; K5]; 1xDeamidated [N4(100)]	0.00156696	0	1	1	4	145309326	145309326 [1377-1389]	1	1890.03	N4(Deamidated): 100	56.9	15.3	25	65	20.1	31.2	32.4	38.7667	1.1965	1.1	Unique	2.41145	High	0	0.0001888
LAMC1	3915	145309326	NP_002284.3	1380	Yes	Yes	5	NKT	FDRRVND	KTAAEEA	Yes	High	[R].VNDNKTAAEEALR.[K]	1xTMT6plex [K5]; 2xDeamidated [N2(100); N4(100)]	0.0342877	0	1	1	3	145309326	145309326 [1377-1389]	1	1661.85	N2(Deamidated): 100; N4(Deamidated): 100	9.1	4	3.7	8.9	5.6	5.5	5.6	6.66667	1.19048	1.1	Unique	1.34824	High	0	0.004067
LAMC1	3915	145309326	NP_002284.3	1380	Yes	Yes	5	NKT	FDRRVND	KTAAEEA	Yes	High	[R].VNDNKTAAEEALR.[K]	2xTMT6plex [N-Term; K5]; 2xDeamidated [N2(100); N4(100)]	1.11017e-05	0	1	1	5	145309326	145309326 [1377-1389]	1	1891.02	N2(Deamidated): 100; N4(Deamidated): 100	43.1	22.1	20.7	89.7	20.1	37.5	28.6333	49.1	1.71478	1.1	Unique	2.17796	High	0	4.727e-08
LAMC1	3915	145309326	NP_002284.3	1107	Yes	Yes	3	NNT	MDRLQRV	NTLSSQI	Yes	High	[R].VNNTLSSQISR.[L]	1xTMT6plex [N-Term]; 2xDeamidated [N2(100); N3(100)]	0.0674066	0.00117085	1	1	1	145309326	145309326 [1106-1116]	0	1449.77	N2(Deamidated): 100; N3(Deamidated): 100	19	8.8	9.7	17.4	11.6	14.2	12.5	14.4	1.152	1.1	Unique	1.23419	High	0.0003202	0.01081
LAMC1	3915	145309326	NP_002284.3	1107	Yes	Yes	3	NNT	MDRLQRV	NTLSSQI	Yes	High	[R].VNNTLSSQISR.[L]	1xTMT6plex [N-Term]; 1xDeamidated [N2(100)]	0.0197213	0	1	1	2	145309326	145309326 [1106-1116]	0	1448.79	N2(Deamidated): 100	42	15.2	17.2	43.6	18.4	28.1	24.8	30.0333	1.21102	1.1	Unique	1.99515	High	0	0.00184
LAMC2	3918	157419138	NP_005553.2	942	Yes	Yes	10	NAT	QEALSMG	ATFYEVE	No	High	[R].AQEALSMGNATFYEVESILK.[N]	2xTMT6plex [N-Term; K20]; 1xOxidation [M7(100)]; 1xDeamidated [N9(100)]	5.64494e-06	0	1	2	1	157419138	157419138 [934-953]	0	2676.38	M7(Oxidation): 100; N9(Deamidated): 100	99.4	102.6	113.1	91.5	105.4	91.5	105.033	96.1333	0.915265	0.92	Unique	3.84845	High	0	1.819e-08
LAMP1	3916	112380628	NP_005552.3	322	Yes	Yes	4	NGS	DPAFKAA	GSLRALQ	Yes	High	[K].AANGSLR.[A]	1xTMT6plex [N-Term]; 1xDeamidated [N3(100)]	0.115123	0.00315632	1	2	3	112380628	112380628 [320-326]	0	918.521	N3(Deamidated): 100	82.9	81.2	63.6	95.1	80.5	92.1	75.9	89.2333	1.17567	1.05	Unique	2.70594	High	0.00084	0.02368
LAMP1	3916	112380628	NP_005552.3	249	Yes	Yes	3	NTT	LTYERKD	TTVTRLL	Yes	High	[K].DNTTVTR.[L]	1xTMT6plex [N-Term]; 1xDeamidated [N2(100)]	0.0959847	0.00222925	1	2	5	112380628	112380628 [248-254]	0	1036.55	N2(Deamidated): 100	84.8	54.6	56	63.1	78.6	80.8	65.1333	74.1667	1.13869	1.05	Unique	2.41274	High	0.002187	0.04846
LAMP1	3916	112380628	NP_005552.3	84	Yes	Yes	3	NTS	RSSCGKE	TSDPSLV	Yes	High	[K].ENTSDPSLVIAFGR.[G]	1xTMT6plex [N-Term]; 1xDeamidated [N2(100)]	0.0542174	0.000598249	1	2	3	112380628	112380628 [83-96]	0	1735.91	N2(Deamidated): 100	10.6	12.5	15.4	8.2	9.9	27.7	12.8333	15.2667	1.18961	1.05	Unique	1.84704	High	0.000164	0.00789
LAMP1	3916	112380628	NP_005552.3	62	Yes	Yes	6	NMT	DTKSGPK	MTFDLPS	Yes	High	[K].SGPKNMTFDLPSDATVVLNR.[S]	2xTMT6plex [N-Term; K4]; 1xOxidation [M6(100)]; 2xDeamidated [N5(100); N19(100)]	1.19334e-07	0	1	2	8	112380628	112380628 [58-77]	1	2638.38	N5(Deamidated): 100; M6(Oxidation): 100; N19(Deamidated): 100	40.6	40.8	30.1	125.7	35.4	25.9	37.1667	62.3333	1.67713	1.05	Unique	4.0582	High	0	7.866e-11
LAMP1	3916	112380628	NP_005552.3	62	Yes	Yes	6	NMT	DTKSGPK	MTFDLPS	Yes	High	[K].SGPKNMTFDLPSDATVVLNR.[S]	2xTMT6plex [N-Term; K4]; 1xOxidation [M6(100)]; 1xDeamidated [N5(100)]	0.0763374	0.00173548	1	2	5	112380628	112380628 [58-77]	1	2637.4	N5(Deamidated): 100; M6(Oxidation): 100	17.9	15.1	13.9	36.2	15.9	16.9	15.6333	23	1.47122	1.05	Unique	1.54758	High	0.0004721	0.01296
LAMP1	3916	112380628	NP_005552.3	62	Yes	Yes	6	NMT	DTKSGPK	MTFDLPS	Yes	High	[K].SGPKNMTFDLPSDATVVLNR.[S]	1xTMT6plex [K4]; 1xOxidation [M6(100)]; 2xDeamidated [N5(100); N19(100)]	7.0374e-05	0	1	2	5	112380628	112380628 [58-77]	1	2409.22	N5(Deamidated): 100; M6(Oxidation): 100; N19(Deamidated): 100	13.5	13.4	9	17	12	10.7	11.9667	13.2333	1.10585	1.05	Unique	2.78871	High	0	1.59e-06
LAMP1	3916	112380628	NP_005552.3	62	Yes	Yes	6	NMT	DTKSGPK	MTFDLPS	Yes	High	[K].SGPKNMTFDLPSDATVVLNR.[S]	1xTMT6plex [K4]; 1xOxidation [M6(100)]; 1xDeamidated [N19(100)]	0.000885557	0	1	2	4	112380628	112380628 [58-77]	1	2408.23	M6(Oxidation): 100; N19(Deamidated): 100	9.5	9.7	10	13.2	9	10.2	9.73333	10.8	1.10959	1.05	Unique	3.09019	High	0	2.842e-05
LAMP1	3916	112380628	NP_005552.3	103	Yes	Yes	8	NFT	RGHTLTL	FTRNATR	Yes	High	[R].GHTLTLNFTR.[N]	1xTMT6plex [N-Term]; 1xDeamidated [N7(100)]	1.58324e-05	0	1	2	21	112380628	112380628 [97-106]	0	1389.77	N7(Deamidated): 100	152.8	240	150.3	311.7	189.7	145.4	181.033	215.6	1.19094	1.05	Unique	4.05373	High	0	1.743e-06
LAMP1	3916	112380628	NP_005552.3	103	Yes	Yes	8	NFT	RGHTLTL	FTRNATR	Yes	High	[R].GHTLTLNFTRNATR.[Y]	1xTMT6plex [N-Term]; 2xDeamidated [N7(100); N11(100)]	0.00146521	0	1	2	4	112380628	112380628 [97-110]	1	1832.98	N7(Deamidated): 100; N11(Deamidated): 100	6	9.7	7.7	11.7	5.7	8.8	7.8	8.73333	1.11966	1.05	Unique	2.28827	High	0	4.641e-05
LAMP1	3916	112380628	NP_005552.3	249	Yes	Yes	4	NTT	LTYERKD	TTVTRLL	Yes	High	[R].KDNTTVTR.[L]	2xTMT6plex [K1; N-Term]; 1xDeamidated [N3(100)]	0.0131557	0	1	2	18	112380628	112380628 [247-254]	1	1393.81	N3(Deamidated): 100	507.8	486	395.7	659.1	568.4	573.3	463.167	600.267	1.29601	1.05	Unique	3.07164	High	0	0.001037
LAMP1	3916	112380628	NP_005552.3	249	Yes	Yes	4	NTT	LTYERKD	TTVTRLL	Yes	High	[R].KDNTTVTR.[L]	1xTMT6plex [K1]; 1xDeamidated [N3(100)]	0.0592162	0.000598249	1	2	9	112380628	112380628 [247-254]	1	1164.64	N3(Deamidated): 100	139.5	123.4	122.5	88.5	142.6	97	128.467	109.367	0.851323	1.05	Unique	2.65624	High	0.009664	0.1553
LAMP1	3916	112380628	NP_005552.3	261	Yes	Yes	8	NKT	RLLNINP	KTSASGS	Yes	High	[R].LLNINPNK.[T]	2xTMT6plex [N-Term; K8]; 1xDeamidated [N7(100)]	0.0212776	0	1	2	4	112380628	112380628 [255-262]	0	1384.86	N7(Deamidated): 100	18.5	24.4	16.7	11.5	24.3	18.1	19.8667	17.9667	0.904362	1.05	Unique	2.2841	High	0	0.002055
LAMP1	3916	112380628	NP_005552.3	84	Yes	Yes	8	NTS	RSSCGKE	TSDPSLV	Yes	High	[R].SSCGKENTSDPSLVIAFGR.[G]	1xCarbamidomethyl [C3]; 2xTMT6plex [N-Term; K5]; 1xDeamidated [N7(100)]	9.29906e-08	0	1	2	2	112380628	112380628 [78-96]	1	2484.28	N7(Deamidated): 100	120.7	172.8	102	4.2	130.3	109.6	131.833	81.3667	0.617193	1.05	Unique	5.1628	High	0	5.502e-11
LAMP1	3916	112380628	NP_005552.3	84	Yes	Yes	8	NTS	RSSCGKE	TSDPSLV	Yes	High	[R].SSCGKENTSDPSLVIAFGR.[G]	1xCarbamidomethyl [C3]; 1xTMT6plex [K5]; 1xDeamidated [N7(100)]	0.00105244	0	1	2	1	112380628	112380628 [78-96]	1	2255.12	N7(Deamidated): 100	11.5	10.4	14.3	10.9	14.5	15.3	12.0667	13.5667	1.12431	1.05	Unique	1.81177	High	0	2.908e-05
LAMP1	3916	112380628	NP_005552.3	121	Yes	Yes	12	NLS	QLMSFVY	LSDTHLF	Yes	High	[R].YSVQLMSFVYNLSDTHLFPNASSK.[E]	2xTMT6plex [N-Term; K24]; 1xOxidation [M6(100)]; 2xDeamidated [N11(100); N20(100)]	9.217e-13	0	1	2	2	112380628	112380628 [111-134]	0	3224.62	M6(Oxidation): 100; N11(Deamidated): 100; N20(Deamidated): 100	210.1	265.3	199.2	286	237	160.9	224.867	227.967	1.01379	1.05	Unique	8.41425	High	0	4.768e-18
LAMP2	3920	169790833	NP_001116078.1	123	Yes	Yes	20	NTT	FSYNTGD	TTFPDAE	Yes	High	[K].AASTYSIDSVSFSYNTGDNTTFPDAEDK.[G]	2xTMT6plex [N-Term; K28]; 1xDeamidated [N]	2.13222e-07	0	1	3	28	169790833	169790833 [105-132]	0	3462.61	N19(Deamidated): 99.48	231.8	174.5	224.2	408.9	228.3	193.7	210.167	276.967	1.31784	1.04	Unique	6.61614	High	0	5.094e-10
LAMP2	3920	169790833	NP_001116078.1	229	Yes	Yes	15	NDT	TYSVNNG	DTCLLAT	Yes	High	[K].EKPEAGTYSVNNGNDTCLLATMGLQLNITQDK.[V]	1xCarbamidomethyl [C17]; 3xTMT6plex [N-Term; K2; K32]; 1xOxidation [M22(100)]; 1xDeamidated [N27(100)]	1.51635e-05	0	1	3	2	169790833	169790833 [216-247]	0	4200.14	M22(Oxidation): 100; N27(Deamidated): 100	107.6	61.6	90.9	104.2	118.2	76.7	86.7	99.7	1.14994	1.04	Unique	6.06273	High	0	7.345e-08
LAMP2	3920	169790833	NP_001116078.1	257	Yes	Yes	11	NTT	SVININP	TTHSTGS	Yes	High	[K].VASVININPNTTHSTGSCR.[S]	1xCarbamidomethyl [C18]; 1xTMT6plex [N-Term]; 1xDeamidated [N10(100)]	0.00121528	0	1	3	3	169790833	169790833 [248-266]	0	2258.14	N10(Deamidated): 100	7	5.7	6.4	6	6.7	6.1	6.36667	6.26667	0.984293	1.04	Unique	2.77114	High	0	3.565e-05
LAMP2	3920	169790833	NP_001116078.1	275	Yes	Yes	3	NSS	HTALLRL	SSTIKYL	Yes	High	[R].LNSSTIK.[Y]	2xTMT6plex [N-Term; K7]; 1xDeamidated [N2(100)]	0.00950441	0	1	3	7	169790833	169790833 [274-280]	0	1221.75	N2(Deamidated): 100	114.5	62.8	101.5	80.1	115.3	58.3	92.9333	84.5667	0.909971	1.04	Unique	2.54886	High	0	0.002122
LAMP2	3920	169790833	NP_001116078.1	275	Yes	Yes	3	NSS	HTALLRL	SSTIKYL	Yes	High	[R].LNSSTIK.[Y]	1xTMT6plex [K7]; 1xDeamidated [N2(100)]	0.174999	0.00554469	1	3	7	169790833	169790833 [274-280]	0	992.583	N2(Deamidated): 100	37.5	24.5	36	26.5	45.9	21.2	32.6667	31.2	0.955102	1.04	Unique	2.41985	High	0.00618	0.1037
LAMP2	3920	169790833	NP_001116078.1	356	Yes	Yes	6	NVT	DLRVQPF	VTQGKYS	Yes	High	[R].VQPFNVTQGK.[Y]	2xTMT6plex [N-Term; K10]; 1xDeamidated [N5(100)]	1.79354e-05	0	1	3	18	169790833	169790833 [352-361]	0	1576.91	N5(Deamidated): 100	526.4	276.2	431.7	355	474.1	244.1	411.433	357.733	0.869481	1.04	Unique	3.82983	High	0	3.777e-05
LAMP2	3920	169790833	NP_001116078.1	356	Yes	Yes	6	NVT	DLRVQPF	VTQGKYS	Yes	High	[R].VQPFNVTQGK.[Y]	1xTMT6plex [K10]; 1xDeamidated [N5(100)]	0.0103594	0	1	3	7	169790833	169790833 [352-361]	0	1347.75	N5(Deamidated): 100	73.5	51.8	83.3	43	92	44.1	69.5333	59.7	0.858581	1.04	Unique	2.61921	High	0.001331	0.03839
LAMP2	3920	169790833	NP_001116078.1	58	Yes	Yes	6	NKT	TVRYETT	KTYKTVT	Yes	High	[R].YETTNKTYK.[T]	3xTMT6plex [N-Term; K6; K9]; 1xDeamidated [N5(100)]	0.00024491	0	1	3	11	169790833	169790833 [54-62]	1	1836.04	N5(Deamidated): 100	327.5	251.5	348.6	871.2	297.2	99.4	309.2	422.6	1.36675	1.04	Unique	3.16895	High	0	0.0001148
LAMP2	3920	169790833	NP_001116078.1	58	Yes	Yes	6	NKT	TVRYETT	KTYKTVT	Yes	High	[R].YETTNKTYK.[T]	2xTMT6plex [K6; K9]; 1xDeamidated [N5(100)]	0.047369	0.000598249	1	3	9	169790833	169790833 [54-62]	1	1606.87	N5(Deamidated): 100	92	88.2	132	202.7	121.5	30.6	104.067	118.267	1.13645	1.04	Unique	2.53954	High	0.000164	0.01029
LCN2	3934	38455402	NP_005555.2	85	Yes	Yes	4	NVT	LKEDKSY	VTSVLFR	Yes	High	[K].SYNVTSVLFR.[K]	1xTMT6plex [N-Term]; 1xDeamidated [N3(100)]	0.132982	0.00315632	1	1	2	38455402	38455402 [83-92]	0	1415.77	N3(Deamidated): 100	7.4	23.9	39.2	7.7	7.7	8.5	23.5	7.96667	0.339007	#N/A	Unique	2.04277	High	0.00084	0.02922
LGALS3BP	3959	5031863	NP_005558.1	551	Yes	Yes	11	NSS	IPSALDT	SSKSTSS	Yes	High	[K].AAIPSALDTNSSK.[S]	2xTMT6plex [N-Term; K13]; 1xDeamidated [N10(100)]	4.0343e-05	0	1	1	11	5031863	5031863 [542-554]	0	1733.97	N10(Deamidated): 100	97.5	138.9	24.2	44.8	56.7	23.8	86.8667	41.7667	0.480814	0.79	Unique	3.46912	High	0	1.186e-05
LGALS3BP	3959	5031863	NP_005558.1	551	Yes	Yes	11	NSS	IPSALDT	SSKSTSS	Yes	High	[K].AAIPSALDTNSSK.[S]	1xTMT6plex [K13]; 1xDeamidated [N10(100)]	0.000165272	0	1	1	3	5031863	5031863 [542-554]	0	1504.81	N10(Deamidated): 100	37.2	95.2	10.6	28	22.8	11.8	47.6667	20.8667	0.437762	0.79	Unique	3.45234	High	0	2.143e-06
LGALS3BP	3959	5031863	NP_005558.1	398	Yes	Yes	4	NLT	LARYKGL	LTEDTYK	Yes	High	[K].GLNLTEDTYKPR.[I]	2xTMT6plex [N-Term; K10]; 1xDeamidated [N3(100)]	8.32649e-07	0	1	1	6	5031863	5031863 [396-407]	0	1866.04	N3(Deamidated): 100	55.4	75.7	13.3	22.1	36.2	16	48.1333	24.7667	0.514543	0.79	Unique	3.32798	High	0	1.219e-09
LGALS3BP	3959	5031863	NP_005558.1	69	Yes	Yes	7	NAT	CRALGFE	ATQALGR	Yes	High	[R].ALGFENATQALGR.[A]	1xTMT6plex [N-Term]; 1xDeamidated [N6(100)]	7.07348e-07	0	1	1	9	5031863	5031863 [64-76]	0	1577.85	N6(Deamidated): 100	194	251.1	26.2	99.6	117.4	27.9	157.1	81.6333	0.519627	0.79	Unique	4.43248	High	0	9.701e-10
LGALS3BP	3959	5031863	NP_005558.1	125	Yes	Yes	9	NET	DAGVVCT	ETRSTHT	Yes	High	[R].DAGVVCTNETR.[S]	1xCarbamidomethyl [C6]; 1xTMT6plex [N-Term]; 1xDeamidated [N8(100)]	2.20471e-06	0	1	1	4	5031863	5031863 [118-128]	0	1451.7	N8(Deamidated): 100	52.2	55.1	9	8.2	28.5	10.1	38.7667	15.6	0.402408	0.79	Unique	3.73509	High	0	4.818e-09
LGALS3BP	3959	5031863	NP_005558.1	1392	Yes	Yes	11	NSS	NKVEAAQ	LTLPGSL	No	High	[R].TVIRPFYLTNSSGVD.[-]	1xTMT6plex [N-Term]; 1xDeamidated [N10(100)]	0.00733822	0	1	1	3	5031863	5031863 [571-585]	0	1899.01	N10(Deamidated): 100	62.9	111.5	75.7	57.9	48.7	24.6	83.3667	43.7333	0.52459	0.79	Unique	2.73368	High	0.0005939	0.01414
LGALS3BP	3959	5031863	NP_005558.1	398	Yes	Yes	6	NLT	LARYKGL	LTEDTYK	Yes	High	[R].YKGLNLTEDTYKPR.[I]	3xTMT6plex [N-Term; K2; K12]; 1xDeamidated [N5(100)]	0.0146118	0	1	1	2	5031863	5031863 [394-407]	1	2386.36	N5(Deamidated): 100	24.5	30	5.7	46.1	12	6.2	20.0667	21.4333	1.06811	0.79	Unique	1.80681	High	0	0.0012
LGMN	5641	1034587582	XP_016876952.1	167	Yes	Yes	4	NET	DLHVKDL	ETIHYMY	Yes	High	[K].DLNETIHYMYK.[H]	2xTMT6plex [N-Term; K11]; 1xOxidation [M9(100)]; 1xDeamidated [N3(100)]	0.00181811	0	1	4	6	1034587582	1034587582 [165-175]	0	1901.97	N3(Deamidated): 100; M9(Oxidation): 100	42.9	137.2	47	41.8	62.4	59.9	75.7	54.7	0.722589	0.83	Unique	3.79848	High	0	6.311e-05
LGMN	5641	1034587582	XP_016876952.1	263	Yes	Yes	5	NTS	HLVKSHT	TSHVMQY	Yes	High	[K].SHTNTSHVMQYGNK.[T]	2xTMT6plex [N-Term; K14]; 1xOxidation [M9(100)]; 2xDeamidated [N4(100); N13(100)]	5.10401e-06	0	1	4	6	1034587582	1034587582 [260-273]	0	2080.02	N4(Deamidated): 100; M9(Oxidation): 100; N13(Deamidated): 100	13.2	39.4	7.7	7.8	13.4	12.7	20.1	11.3	0.562189	0.83	Unique	3.03962	High	0	1.221e-05
LIPA	3988	189083851	NP_001121077.1	321	Yes	Yes	7	NQS	AKNYFHY	QSYPPTY	Yes	High	[K].NYFHYNQSYPPTYNVK.[D]	2xTMT6plex [N-Term; K16]; 2xDeamidated [N1(100); N6(100)]	0.0631829	0.000598249	1	2	1	189083851	189083851 [316-331]	0	2495.23	N1(Deamidated): 100; N6(Deamidated): 100	18.2	13.7	10.7	12	10.4	8.6	14.2	10.3333	0.7277	1.04	Unique	1.72576	High	0.000164	0.009801
LIPA	3988	189083851	NP_001121077.1	321	Yes	Yes	7	NQS	AKNYFHY	QSYPPTY	Yes	High	[K].NYFHYNQSYPPTYNVK.[D]	2xTMT6plex [N-Term; K16]; 1xDeamidated [N6(100)]	1.3074e-08	0	1	2	9	189083851	189083851 [316-331]	0	2494.24	N6(Deamidated): 100	43.4	32.4	40.6	23.3	30.6	22.7	38.8	25.5333	0.658076	1.04	Unique	4.90193	High	0	1.918e-11
LIPA	3988	189083851	NP_001121077.1	321	Yes	Yes	7	NQS	AKNYFHY	QSYPPTY	Yes	High	[K].NYFHYNQSYPPTYNVK.[D]	1xTMT6plex [K16]; 1xDeamidated [N]	5.72676e-06	0	1	2	17	189083851	189083851 [316-331]	0	2265.08	N6(Deamidated): 100	81.1	70.2	138.6	51.1	71.8	40.3	96.6333	54.4	0.562953	1.04	Unique	3.70309	High	0	2.671e-07
LMAN2	10960	5803023	NP_006807.1	183	Yes	Yes	12	NGS	YISVMVN	GSLSYDH	Yes	High	[R].VFPYISVMVNNGSLSYDHSK.[D]	2xTMT6plex [N-Term; K20]; 1xOxidation [M8(100)]; 2xDeamidated [N10(100); N11(100)]	8.65474e-09	0	1	1	2	5803023	5803023 [173-192]	0	2733.38	M8(Oxidation): 100; N10(Deamidated): 100; N11(Deamidated): 100	32.4	26	31.4	29.7	28.6	25.6	29.9333	27.9667	0.934298	0.93	Unique	4.52565	High	0	1.933e-12
LMAN2	10960	5803023	NP_006807.1	183	Yes	No	12	NGS	YISVMVN	GSLSYDH	Yes	High	[R].VFPYISVMVNNGSLSYDHSK.[D]	2xTMT6plex [N-Term; K20]; 1xOxidation [M8(100)]; 1xDeamidated [N]	3.82754e-06	0	1	1	4	5803023	5803023 [173-192]	0	2732.4	M8(Oxidation): 100; N10(Deamidated): 50; N11(Deamidated): 50	18.2	18.2	20.1	15.7	19.2	13.6	18.8333	16.1667	0.858407	0.93	Unique	4.5679	High	0	1.049e-08
LMAN2	10960	5803023	NP_006807.1	183	Yes	Yes	12	NGS	YISVMVN	GSLSYDH	Yes	High	[R].VFPYISVMVNNGSLSYDHSK.[D]	1xTMT6plex [K20]; 1xOxidation [M8(100)]; 1xDeamidated [N11(99.6)]	4.39809e-05	0	1	1	5	5803023	5803023 [173-192]	0	2503.24	M8(Oxidation): 100; N11(Deamidated): 99.6	13.5	11.8	16	14.3	15.6	14.7	13.7667	14.8667	1.0799	0.93	Unique	2.98604	High	0	3.303e-07
LMAN2L	81562	214010240	NP_001135764.1	192	Yes	Yes	12	NGS	YISAMVN	GSLSYDH	No	High	[R].VFPYISAMVNNGSLSYDHER.[D]	1xTMT6plex [N-Term]; 1xOxidation [M8(100)]; 2xDeamidated [N10(100); N11(100)]	0.00143738	0	1	6	2	214010240	214010240 [182-201]	0	2546.21	M8(Oxidation): 100; N10(Deamidated): 100; N11(Deamidated): 100	12.4	7.4	10.8	14.5	10.8	13	10.2	12.7667	1.25163	1.1	Unique	2.57369	High	0	4.537e-05
LMAN2L	81562	214010240	NP_001135764.1	192	Yes	Yes	12	NGS	YISAMVN	GSLSYDH	No	High	[R].VFPYISAMVNNGSLSYDHER.[D]	1xTMT6plex [N-Term]; 1xOxidation [M8(100)]; 1xDeamidated [N11(99.6)]	3.07012e-07	0	1	6	4	214010240	214010240 [182-201]	0	2545.22	M8(Oxidation): 100; N11(Deamidated): 99.67	10.9	11.2	7.5	15	10	13	9.86667	12.6667	1.28378	1.1	Unique	3.98359	High	0	2.97e-10
LMBRD1	55788	261878497	NP_060838.3	457	Yes	Yes	3	NST	TSDNHKG	STLSVPK	Yes	High	[K].GNSTLSVPK.[R]	2xTMT6plex [N-Term; K9]; 1xDeamidated [N2(100)]	0.00285351	0	1	2	6	261878497	261878497 [456-464]	0	1361.8	N2(Deamidated): 100	95.8	170.6	40.6	21.7	68.2	56.8	102.333	48.9	0.47785	1.2	Unique	2.81578	High	0	0.0001191
LMBRD1	55788	261878497	NP_060838.3	78	Yes	Yes	4	NGT	VSYMKNQ	GTFKDWA	Yes	High	[K].NQNGTFKDWANANVSR.[Q]	1xTMT6plex [K7]; 2xDeamidated [N11(100); N13(100)]	0.000391863	0	1	2	2	261878497	261878497 [76-91]	1	2052.99	N3(Deamidated): 99.81; N13(Deamidated): 100	11.7	15.3	6.6	6.7	8.6	10.1	11.2	8.46667	0.755952	1.2	Unique	2.13525	High	0	7.21e-06
LNPEP	4012	61742777	NP_005566.2	145	Yes	Yes	3	NQS	KEGCHKK	QSIGLIQ	Yes	High	[K].KNQSIGLIQPFATNGK.[L]	3xTMT6plex [K1; N-Term; K16]; 2xDeamidated [N2(100); N14(100)]	3.01354e-11	0	1	2	4	61742777	61742777 [144-159]	1	2405.4	N2(Deamidated): 100; N14(Deamidated): 100	20.3	27.5	22.6	8.9	16.7	28.9	23.4667	18.1667	0.774148	#N/A	Unique	4.99739	High	0	6.515e-16
LNPEP	4012	61742777	NP_005566.2	145	Yes	Yes	3	NQS	KEGCHKK	QSIGLIQ	Yes	High	[K].KNQSIGLIQPFATNGK.[L]	2xTMT6plex [K1; K16]; 2xDeamidated [N2(100); N14(100)]	5.83855e-07	0	1	2	6	61742777	61742777 [144-159]	1	2176.24	N2(Deamidated): 100; N14(Deamidated): 100	15.6	18.9	17.3	8.8	15.7	19	17.2667	14.5	0.839768	#N/A	Unique	3.52345	High	0	7.378e-10
LNPEP	4012	61742777	NP_005566.2	448	Yes	Yes	10	NTS	ETLLYDS	TSSMADR	Yes	High	[R].EETLLYDSNTSSMADR.[K]	1xTMT6plex [N-Term]; 1xOxidation [M13(100)]; 1xDeamidated [N9(100)]	0.000281457	0	1	2	4	61742777	61742777 [440-455]	0	2077.94	N9(Deamidated): 100; M13(Oxidation): 100	9.5	10.3	6.8	8.2	10.8	13.7	8.86667	10.9	1.22932	#N/A	Unique	2.00881	High	0	2.372e-05
LNPEP	4012	61742777	NP_005566.2	448	Yes	Yes	10	NTS	ETLLYDS	TSSMADR	Yes	High	[R].EETLLYDSNTSSMADRK.[L]	1xTMT6plex [K17]; 1xOxidation [M13(100)]; 1xDeamidated [N9(100)]	0.0378417	0	1	2	2	61742777	61742777 [440-456]	1	2206.04	N9(Deamidated): 100; M13(Oxidation): 100	6.3	8.4	9.9	6.8	10.8	9.9	8.2	9.16667	1.11789	#N/A	Unique	1.37435	High	0	0.004674
LNPEP	4012	61742777	NP_005566.2	448	Yes	Yes	10	NTS	ETLLYDS	TSSMADR	Yes	High	[R].EETLLYDSNTSSMADRK.[L]	2xTMT6plex [N-Term; K17]; 1xOxidation [M13(100)]; 1xDeamidated [N9(100)]	0.00626456	0	1	2	4	61742777	61742777 [440-456]	1	2435.2	N9(Deamidated): 100; M13(Oxidation): 100	32.5	44.9	40	14.1	35.5	39	39.1333	29.5333	0.754685	#N/A	Unique	2.4927	High	0	0.0003619
LOC102723996	102723996	578836290	XP_006723962.1	70	Yes	Yes	11	NSS	VTYHIPQ	SSLENVD	No	High	[K].TVVTYHIPQNSSLENVDSR.[Y]	1xTMT6plex [N-Term]; 1xDeamidated [N10(100)]	2.02263e-07	0	1	7	3	578836290	578836290 [61-79]	0	2389.22	N10(Deamidated): 100	6.2	5.2	10.2	8.4	5.8	7.2	7.2	7.13333	0.990741	#N/A	Unique	3.65225	High	0	1.647e-10
LOC102723996	102723996	578836290	XP_006723962.1	102	Yes	Yes	4	NVT	DFSLRLF	VTPQDEQ	No	High	[R].LFNVTPQDEQK.[F]	2xTMT6plex [N-Term; K11]; 1xDeamidated [N3(100)]	0.00485879	0	1	8	4	578836290	578836290 [100-110]	0	1777.97	N3(Deamidated): 100	8.6	9.9	27.8	11.3	24.9	9	15.4333	15.0667	0.976242	#N/A	Unique	2.24069	High	0	0.0002539
LOC102723996	102723996	578836290	XP_006723962.1	102	Yes	Yes	4	NVT	DFSLRLF	VTPQDEQ	No	High	[R].LFNVTPQDEQK.[F]	1xTMT6plex [K11]; 1xDeamidated [N3(100)]	0.00247118	0	1	8	2	578836290	578836290 [100-110]	0	1548.81	N3(Deamidated): 100	9.6	16.7	40.7	9.1	36.1	14.5	22.3333	19.9	0.891045	#N/A	Unique	2.70912	High	0	9.752e-05
LOC107983993	107983993	1034657818	XP_016868384.1	145	Yes	Yes	11	NFS	QDIPAPA	FSQRGYY	No	High	[R].TNQDIPAPANFSQR.[G]	1xTMT6plex [N-Term]; 2xDeamidated [N2(100); N10(100)]	0.0123638	0	1	2	4	1034657818	1034657818 [136-149]	0	1789.89	N2(Deamidated): 100; N10(Deamidated): 100	9.6	41.1	8.4	8.6	6.9	11.6	19.7	9.03333	0.458545	#N/A	Unique	1.93563	High	0	0.0009485
LOC107983993	107983993	1034657818	XP_016868384.1	145	Yes	Yes	11	NFS	QDIPAPA	FSQRGYY	No	High	[R].TNQDIPAPANFSQR.[G]	1xTMT6plex [N-Term]; 1xDeamidated [N10(100)]	0.00297935	0	1	2	5	1034657818	1034657818 [136-149]	0	1788.91	N10(Deamidated): 100	11.2	18.3	8.7	8.1	7.6	9.2	12.7333	8.3	0.651832	#N/A	Unique	1.98847	High	0	0.0001268
LOX	4015	20149540	NP_002308.2	144	Yes	Yes	4	NQT	AGASRAE	QTAPGEV	Yes	High	[R].AENQTAPGEVPALSNLRPPSR.[V]	1xTMT6plex [N-Term]; 1xDeamidated [N3(100)]	0.00120947	0	1	1	3	20149540	20149540 [142-162]	0	2434.29	N3(Deamidated): 100	21	7.8	7.5	21.1	9.9	11.7	12.1	14.2333	1.17631	#N/A	Unique	2.11309	High	0	3.924e-05
LOX	4015	20149540	NP_002308.2	81	Yes	Yes	12	NAS	AAVPGAA	ASAQQPR	Yes	High	[R].DPGAAVPGAANASAQQPR.[T]	1xTMT6plex [N-Term]; 1xDeamidated [N11(100)]	9.43108e-06	0	1	1	5	20149540	20149540 [71-88]	0	1907.98	N11(Deamidated): 100	19.1	10.8	8.5	20.8	18.2	11.4	12.8	16.8	1.3125	#N/A	Unique	3.27393	High	0	3.74e-08
LOX	4015	20149540	NP_002308.2	81	Yes	Yes	13	NAS	AAVPGAA	ASAQQPR	Yes	High	[R].RDPGAAVPGAANASAQQPR.[T]	1xTMT6plex [N-Term]; 1xDeamidated [N12(100)]	7.04169e-09	0	1	1	2	20149540	20149540 [70-88]	1	2064.08	N12(Deamidated): 100	7.3	5.1	4.4	13.8	5.9	7.7	5.6	9.13333	1.63095	#N/A	Unique	4.26198	High	0	4.907e-12
LOX	4015	20149540	NP_002308.2	81	Yes	Yes	14	NAS	AAVPGAA	ASAQQPR	Yes	High	[R].RRDPGAAVPGAANASAQQPR.[T]	1xTMT6plex [N-Term]; 1xDeamidated [N13(100)]	0.00158206	0	1	1	4	20149540	20149540 [69-88]	2	2220.18	N13(Deamidated): 100	4.5	4	4.2	5.4	3.4	6.8	4.23333	5.2	1.22835	#N/A	Unique	2.59953	High	0	5.196e-05
LOXL2	4017	4505011	NP_002309.1	644	Yes	Yes	18	NGT	HYDLLNL	GTKVAEG	No	High	[R].HYHSMEVFTHYDLLNLNGTK.[V]	2xTMT6plex [N-Term; K20]; 1xOxidation [M5(100)]; 1xDeamidated [N17(99.3)]	0.0245281	0	1	1	2	4505011	4505011 [628-647]	0	2894.45	M5(Oxidation): 100; N17(Deamidated): 100	4.5	5	7.6	5.3	8.8	7.6	5.7	7.23333	1.26901	#N/A	Unique	1.74997	High	0	0.002505
LRP1	4035	1034579538	XP_016874792.1	3065	Yes	Yes	8	NYT	KLNLDGS	YTLLKQG	No	High	[K].LNLDGSNYTLLK.[Q]	2xTMT6plex [N-Term; K12]; 1xDeamidated [N7(100)]	0.000109936	0	1	2	2	1034579538	1034579538 [3059-3070]	0	1810.04	N7(Deamidated): 100	42.7	36.3	33	28.2	48.5	24	37.3333	33.5667	0.899107	#DIV/0!	Unique	2.86636	High	0	1.2e-06
LRP1	4035	1034579538	XP_016874792.1	2144	Yes	Yes	7	NAT	IKRGSKD	ATDSVPL	No	High	[K].RGSKDNATDSVPLR.[T]	2xTMT6plex [N-Term; K4]; 1xDeamidated [N6(100)]	0.0208775	0	1	2	3	1034579538	1034579538 [2139-2152]	2	1975.1	N6(Deamidated): 100	7.5	4.4	3	5.5	6	3.5	4.96667	5	1.00671	#DIV/0!	Unique	1.66175	High	0	0.001992
LRP1	4035	1034579538	XP_016874792.1	2144	Yes	Yes	7	NAT	IKRGSKD	ATDSVPL	No	High	[K].RGSKDNATDSVPLR.[T]	1xTMT6plex [K4]; 1xDeamidated [N6(100)]	0.0139978	0	1	2	5	1034579538	1034579538 [2139-2152]	2	1745.93	N6(Deamidated): 100	9.5	7.2	7.4	10	7.6	6.9	8.03333	8.16667	1.0166	#DIV/0!	Unique	2.35743	High	0	0.001558
LRP1	4035	1034579538	XP_016874792.1	1528	Yes	Yes	6	NVT	ANKWTGH	VTVVQRT	No	High	[K].WTGHNVTVVQR.[T]	1xTMT6plex [N-Term]; 1xDeamidated [N5(100)]	0.00395354	0	1	2	4	1034579538	1034579538 [1524-1534]	0	1526.83	N5(Deamidated): 100	6	6.3	4.2	2.7	4.2	6.5	5.5	4.46667	0.812121	#DIV/0!	Unique	2.3208	High	0	0.0002106
LRP1	4035	1034579538	XP_016874792.1	446	Yes	Yes	3	NST	VIRVNRF	STEYQVV	Yes	High	[R].FNSTEYQVVTR.[V]	1xTMT6plex [N-Term]; 1xDeamidated [N2(100)]	1.37784e-06	0	1	2	1	1034579538	1034579538 [445-455]	0	1573.81	N2(Deamidated): 100	63.4	51.3	40.9	27.7	65	20	51.8667	37.5667	0.724293	#DIV/0!	Unique	3.03772	High	0	2.482e-09
LRP1	4035	1034579538	XP_016874792.1	2144	Yes	Yes	6	NAT	IKRGSKD	ATDSVPL	No	High	[R].GSKDNATDSVPLR.[T]	2xTMT6plex [N-Term; K3]; 1xDeamidated [N5(100)]	0.0245281	0	1	2	5	1034579538	1034579538 [2140-2152]	1	1819	N5(Deamidated): 100	24.9	21.1	16	22.1	26.8	11.8	20.6667	20.2333	0.979032	#DIV/0!	Unique	2.25902	High	0	0.002514
LRP1	4035	1034579538	XP_016874792.1	3970	Yes	Yes	7	NIS	DRGVTHL	ISGLKMP	No	High	[R].GVTHLNISGLK.[M]	2xTMT6plex [N-Term; K11]; 1xDeamidated [N6(100)]	0.00519614	0	1	2	5	1034579538	1034579538 [3965-3975]	0	1597.97	N6(Deamidated): 100	17.2	23.5	14.5	28.6	24.5	14.7	18.4	22.6	1.22826	#DIV/0!	Unique	2.44641	High	0	0.0002777
LRP1	4035	1034579538	XP_016874792.1	729	Yes	Yes	8	NGT	RIETILL	GTDRKIV	Yes	High	[R].IETILLNGTDR.[K]	1xTMT6plex [N-Term]; 1xDeamidated [N7(100)]	0.0146118	0	1	2	4	1034579538	1034579538 [723-733]	0	1474.83	N7(Deamidated): 100	23.2	15.9	14.8	16.8	24.1	12.1	17.9667	17.6667	0.983302	#DIV/0!	Unique	2.49088	High	0	0.001204
LRP1	4035	1034579538	XP_016874792.1	3065	Yes	Yes	9	NYT	KLNLDGS	YTLLKQG	No	High	[R].KLNLDGSNYTLLK.[Q]	3xTMT6plex [K1; N-Term; K13]; 1xDeamidated [N8(100)]	0.00027877	0	1	2	4	1034579538	1034579538 [3058-3070]	1	2167.29	N8(Deamidated): 100	23	25.6	18.1	17.8	29.3	9.5	22.2333	18.8667	0.848576	#DIV/0!	Unique	2.70089	High	0	5.005e-05
LRP1	4035	1034579538	XP_016874792.1	4092	Yes	Yes	3	NGT	VIGSIRL	GTDPIVA	No	High	[R].LNGTDPIVAADSK.[R]	1xTMT6plex [K13]; 1xDeamidated [N2(100)]	0.010163	0	1	2	4	1034579538	1034579538 [4091-4103]	0	1530.82	N2(Deamidated): 100	16	16.4	11.8	14.1	19	11.7	14.7333	14.9333	1.01357	#DIV/0!	Unique	2.43817	High	0	0.0009544
LRP1	4035	1034579538	XP_016874792.1	4092	Yes	Yes	3	NGT	VIGSIRL	GTDPIVA	No	High	[R].LNGTDPIVAADSK.[R]	2xTMT6plex [N-Term; K13]; 1xDeamidated [N2(100)]	1.45969e-07	0	1	2	6	1034579538	1034579538 [4091-4103]	0	1759.98	N2(Deamidated): 100	37.7	30.5	26.3	27.2	37.6	16.1	31.5	26.9667	0.856085	#DIV/0!	Unique	3.6668	High	0	1.045e-10
LRP1	4035	1034579538	XP_016874792.1	4092	Yes	Yes	3	NGT	VIGSIRL	GTDPIVA	No	High	[R].LNGTDPIVAADSKR.[G]	1xTMT6plex [K13]; 1xDeamidated [N2(100)]	0.000812319	0	1	2	5	1034579538	1034579538 [4091-4104]	1	1686.92	N2(Deamidated): 100	15.2	14.5	11.2	12.4	13.6	11.8	13.6333	12.6	0.924205	#DIV/0!	Unique	1.92044	High	0	2.019e-05
LRP1	4035	1034579538	XP_016874792.1	1842	Yes	Yes	2	NST	SGSVVLR	STTLVMH	No	High	[R].NSTTLVMHMK.[V]	1xTMT6plex [K10]; 2xOxidation [M7(100); M9(100)]; 1xDeamidated [N1(100)]	0.197549	0.0078852	1	2	1	1034579538	1034579538 [1842-1851]	0	1423.71	N1(Deamidated): 100; M7(Oxidation): 100; M9(Oxidation): 100	10.1	15.8	7.2	9.2	15.1	12.3	11.0333	12.2	1.10574	#DIV/0!	Unique	0.710646	High	0.002411	0.05315
LRP1	4035	1034579538	XP_016874792.1	2134	Yes	Yes	5	NGS	WSDRTHA	GSIKRGS	No	High	[R].THANGSIK.[R]	2xTMT6plex [N-Term; K8]; 1xDeamidated [N4(100)]	0.107066	0.00274374	1	2	1	1034579538	1034579538 [2131-2138]	0	1286.75	N4(Deamidated): 100	10.3	6.2	5.9	3.4	10.2	8.8	7.46667	7.46667	1	#DIV/0!	Unique	1.50981	High	0.0007256	0.0212
LRP1	4035	1034579538	XP_016874792.1	2134	Yes	Yes	5	NGS	WSDRTHA	GSIKRGS	No	High	[R].THANGSIK.[R]	1xTMT6plex [K8]; 1xDeamidated [N4(100)]	0.0542174	0.000598249	1	2	3	1034579538	1034579538 [2131-2138]	0	1057.58	N4(Deamidated): 100	14.4	12.9	13.1	6.3	17.1	12	13.4667	11.8	0.876238	#DIV/0!	Unique	2.23488	High	0.000164	0.00787
LRP1	4035	1034579538	XP_016874792.1	446	Yes	Yes	6	NST	VIRVNRF	STEYQVV	Yes	High	[R].VNRFNSTEYQVVTR.[V]	1xTMT6plex [N-Term]; 1xDeamidated [N]	0.0342877	0	1	2	3	1034579538	1034579538 [442-455]	1	1943.02	N5(Deamidated): 99.63	15.6	13.4	9.1	17.2	15.4	14.9	12.7	15.8333	1.24672	#DIV/0!	Unique	2.32374	High	0	0.004058
LRP10	26020	530403467	XP_005267567.1	307	Yes	Yes	4	NAT	WSNGRGF	ATYHVRG	No	High	[R].GFNATYHVR.[G]	1xTMT6plex [N-Term]; 1xDeamidated [N3(100)]	0.0010936	0	1	2	3	530403467	530403467 [305-313]	0	1294.67	N3(Deamidated): 100	4	3.1	3.1	4.7	3.9	6.1	3.4	4.9	1.44118	#N/A	Unique	2.74589	High	0	3.072e-05
LRP11	84918	239787919	NP_116221.3	291	Yes	Yes	5	NVS	AGQRSSD	VSVTVLR	No	High	[R].SSDNVSVTVLR.[A]	1xTMT6plex [N-Term]; 1xDeamidated [N4(100)]	0.00987538	0	1	3	3	239787919	239787919 [288-298]	0	1406.77	N4(Deamidated): 100	46.3	50.6	19.9	23.1	17	32	38.9333	24.0333	0.617295	#N/A	Unique	2.57077	High	0	0.001135
LRP4	4038	157384998	NP_002325.2	1467	Yes	No	5	NNS	SCRKVLI	NSLDEPR	No	High	[K].VLINNSLDEPR.[A]	1xTMT6plex [N-Term]; 1xDeamidated [N]	0.0715725	0.00117085	1	4	2	157384998	157384998 [1464-1474]	0	1499.83	N4(Deamidated): 50; N5(Deamidated): 50	14.2	15.7	12.1	13.5	10.3	15.5	14	13.1	0.935714	#N/A	Unique	1.87166	High	0.0003202	0.0118
LRP4	4038	157384998	NP_002325.2	1467	Yes	Yes	6	NNS	SCRKVLI	NSLDEPR	No	High	[R].KVLINNSLDEPR.[A]	2xTMT6plex [K1; N-Term]; 1xDeamidated [N5(100)]	0.00240109	0	1	4	4	157384998	157384998 [1463-1474]	1	1857.08	N5(Deamidated): 100	12.2	12.5	7.6	11.7	6.2	12.4	10.7667	10.1	0.93808	#N/A	Unique	2.3353	High	0	9.365e-05
LRP4	4038	157384998	NP_002325.2	1415	Yes	Yes	6	NGS	VIRRADL	GSNMETV	No	High	[R].RADLNGSNMETVIGR.[G]	1xTMT6plex [N-Term]; 1xOxidation [M9(100)]; 1xDeamidated [N5(100)]	0.091701	0.00222925	1	4	2	157384998	157384998 [1411-1425]	1	1878.95	N5(Deamidated): 100; M9(Oxidation): 100	17.7	17.8	17.3	17.6	12.6	21.3	17.6	17.1667	0.975379	#N/A	Unique	1.27532	High	0.0005939	0.01692
LRP5	4041	767968172	XP_011543331.1	147	Yes	Yes	8	NGT	RIEVANL	GTSRKVL	No	High	[R].IEVANLNGTSR.[K]	1xTMT6plex [N-Term]; 1xDeamidated [N7(99.7)]	0.0193501	0	1	5	5	767968172	767968172 [141-151]	0	1403.77	N7(Deamidated): 99.73	22.7	24.9	15	11.4	20.7	19	20.8667	17.0333	0.816294	#N/A	Unique	2.26551	High	0	0.001793
LTBP1	4052	767914547	XP_011531155.1	347	Yes	Yes	15	NHT	AAPFQLS	HTGRIKV	Yes	High	[R].YVQDQVAAPFQLSNHTGR.[I]	1xTMT6plex [N-Term]; 1xDeamidated [N14(100)]	0.0169375	0	1	14	1	767914547	767914547 [334-351]	0	2261.15	N14(Deamidated): 100	7.6	6.9	6.1	32.2	5.4	7.5	6.86667	15.0333	2.18932	#N/A	Unique	1.73199	High	0	0.001486
LTBR	4055	4505039	NP_002333.1	177	Yes	Yes	7	NTS	CKAGHFQ	TSSPSAR	Yes	High	[K].AGHFQNTSSPSAR.[C]	1xTMT6plex [N-Term]; 1xDeamidated [N6(100)]	0.000292466	0	1	4	2	4505039	4505039 [172-184]	0	1589.79	N6(Deamidated): 100	110.5	62.7	35.2	92.5	67.3	56.4	69.4667	72.0667	1.03743	#N/A	Unique	3.82497	High	0	4.769e-06
M6PR	4074	4505061	NP_002346.1	83	Yes	Yes	5	NHT	RVCREAG	HTSGAGL	Yes	High	[R].EAGNHTSGAGLVQINK.[S]	2xTMT6plex [N-Term; K16]; 2xDeamidated [N4(100); N15(100)]	1.01864e-07	0	1	2	5	4505061	4505061 [80-95]	0	2056.11	N4(Deamidated): 100; N15(Deamidated): 100	29.7	14.6	13.4	15.1	11.5	24.3	19.2333	16.9667	0.882149	1.03	Unique	5.13969	High	0	6.29e-11
M6PR	4074	4505061	NP_002346.1	83	Yes	Yes	5	NHT	RVCREAG	HTSGAGL	Yes	High	[R].EAGNHTSGAGLVQINK.[S]	2xTMT6plex [N-Term; K16]; 1xDeamidated [N4(100)]	5.30756e-11	0	1	2	29	4505061	4505061 [80-95]	0	2055.12	N4(Deamidated): 100	249.5	98.9	97.7	87.3	59.9	174.1	148.7	107.1	0.720242	1.03	Unique	6.15379	High	0	5.076e-15
M6PR	4074	4505061	NP_002346.1	83	Yes	Yes	5	NHT	RVCREAG	HTSGAGL	Yes	High	[R].EAGNHTSGAGLVQINK.[S]	1xTMT6plex [K16]; 1xDeamidated [N4(100)]	0.0201952	0	1	2	13	4505061	4505061 [80-95]	0	1825.96	N4(Deamidated): 100	65.6	53.8	39.1	36.3	29.8	47.3	52.8333	37.8	0.715457	1.03	Unique	2.71969	High	0	0.002999
MAN2A1	4124	51477714	NP_002363.2	78	Yes	Yes	6	NLS	NIRDSVI	LSESVED	No	High	[R].DSVINLSESVEDGPK.[S]	2xTMT6plex [N-Term; K15]; 1xDeamidated [N5(100)]	1.35815e-06	0	1	3	5	51477714	51477714 [74-88]	0	2048.08	N5(Deamidated): 100	19.2	13.2	16.2	16.5	16	27.6	16.2	20.0333	1.23663	#N/A	Unique	2.92791	High	0	2.435e-09
MAN2B1	4125	530414862	XP_005259970.1	767	Yes	Yes	3	NQT	YRPTWKL	QTEPVAG	No	High	[K].LNQTEPVAGNYYPVNTR.[I]	1xTMT6plex [N-Term]; 1xDeamidated [N2(100)]	1.93689e-06	0	1	4	3	530414862	530414862 [766-782]	0	2166.1	N2(Deamidated): 100	14.8	11.3	17.7	16.5	14.2	16	14.6	15.5667	1.06621	#N/A	Unique	3.43319	High	0	4.024e-09
MAN2B1	4125	530414862	XP_005259970.1	767	Yes	Yes	10	NQT	YRPTWKL	QTEPVAG	No	High	[R].DYRPTWKLNQTEPVAGNYYPVNTR.[I]	2xTMT6plex [N-Term; K7]; 2xDeamidated [N9(100); N]	0.00286722	0	1	4	1	530414862	530414862 [759-782]	1	3342.72	N9(Deamidated): 100; N17(Deamidated): 50; N22(Deamidated): 50	9.9	6.1	6.9	18	7.4	8.2	7.63333	11.2	1.46725	#N/A	Unique	2.1236	High	0	0.00012
MAN2B1	4125	530414862	XP_005259970.1	767	Yes	Yes	10	NQT	YRPTWKL	QTEPVAG	No	High	[R].DYRPTWKLNQTEPVAGNYYPVNTR.[I]	2xTMT6plex [N-Term; K7]; 1xDeamidated [N9(100)]	0.000141078	0	1	4	2	530414862	530414862 [759-782]	1	3341.73	N9(Deamidated): 100	8	9.3	5.9	21	8.6	9	7.73333	12.8667	1.66379	#N/A	Unique	3.09527	High	0	1.708e-06
MAN2B2	23324	50659093	NP_056089.1	748	Yes	Yes	9	NNS	RPYVSYV	NSIARNY	Yes	High	[R].RPYVSYVNNSIAR.[N]	1xTMT6plex [N-Term]; 2xDeamidated [N8(100); N9(100)]	0.051036	0.000598249	1	2	3	50659093	50659093 [741-753]	0	1769.94	N8(Deamidated): 100; N9(Deamidated): 100	6.5	6.7	8.3	10.3	8	9.1	7.16667	9.13333	1.27442	#N/A	Unique	1.80327	High	0.003647	0.07046
MAN2B2	23324	50659093	NP_056089.1	748	Yes	Yes	9	NNS	RPYVSYV	NSIARNY	Yes	High	[R].RPYVSYVNNSIAR.[N]	1xTMT6plex [N-Term]; 1xDeamidated [N8(100)]	6.90366e-05	0	1	2	2	50659093	50659093 [741-753]	0	1768.95	N8(Deamidated): 100	8.3	4	11	6.4	7.1	5	7.76667	6.16667	0.793991	#N/A	Unique	3.18334	High	0	6.236e-07
MCAM	4162	71274107	NP_006491.2	544	Yes	Yes	3	NST	ASPHTRA	STSTERK	No	High	[R].ANSTSTER.[K]	1xTMT6plex [N-Term]; 1xDeamidated [N2(100)]	0.045633	0	1	4	1	71274107	71274107 [543-550]	0	1095.55	N2(Deamidated): 100	9.3	5.6	175.4	42.7	29.6	7.3	63.4333	26.5333	0.418287	1.11	Unique	2.52558	High	0	0.006134
MEGF8	1954	429836859	NP_001258867.1	1271	Yes	Yes	6	NVS	GGRALLT	VSSVALG	No	High	[R].ALLTNVSSVALGSR.[R]	1xTMT6plex [N-Term]; 1xDeamidated [N5(100)]	0.00286722	0	1	2	3	429836859	429836859 [1267-1280]	0	1617.94	N5(Deamidated): 100	28.2	21.2	22.4	21.2	22	21.3	23.9333	21.5	0.898329	#DIV/0!	Unique	2.36519	High	0	0.0001204
METTL9	51108	116014336	NP_057109.3	35	Yes	Yes	6	NMT	LTRSLYV	MTSGPGG	Yes	High	[R].SLYVNMTSGPGGPAAAAGGR.[K]	1xTMT6plex [N-Term]; 1xOxidation [M6(100)]; 1xDeamidated [N5(100)]	0.00158206	0	1	2	1	116014336	116014336 [31-50]	0	2080.03	N5(Deamidated): 100; M6(Oxidation): 100	8	10.1	7	7.4	6.3	9.3	8.36667	7.66667	0.916335	#N/A	Unique	2.35334	High	0	5.203e-05
MFGE8	4240	167830475	NP_005919.2	325	Yes	Yes	6	NDS	SYKVAYS	DSANWTE	No	High	[K].VAYSNDSANWTEYQDPR.[T]	1xTMT6plex [N-Term]; 1xDeamidated [N5(99.5)]	0.136605	0.00315632	1	4	1	167830475	167830475 [321-337]	0	2246.02	N5(Deamidated): 99.53	6.3	3.9	5.5	7.8	7.6	7.7	5.23333	7.7	1.47134	#N/A	Unique	1.21826	High	0.0009713	0.03045
MGAT4B	11282	1034643450	XP_016864487.1	465	Yes	Yes	14	NTS	HPEDKLF	TSVEVLP	No	High	[R].SGNIEHPEDKLFNTSVEVLPFDNPQSDKEALQEGR.[T]	2xTMT6plex [K10; K28]; 1xDeamidated [N13(100)]	2.80228e-06	0	1	3	7	1034643450	1034643450 [453-487]	2	4399.21	N13(Deamidated): 100	9.7	7.5	14.3	14.8	11.5	11.5	10.5	12.6	1.2	#N/A	Unique	4.41682	High	0	6.756e-09
MGAT5	4249	767918190	XP_011509502.1	447	Yes	Yes	3	NQS	INEIKRQ	QSLVYGK	No	High	[R].QNQSLVYGK.[V]	1xTMT6plex [K9]; 1xDeamidated [N2(100)]	0.0623118	0.000598249	1	2	1	767918190	767918190 [446-454]	0	1266.69	N2(Deamidated): 100	13.6	14.4	15.1	13.9	11.7	18.7	14.3667	14.7667	1.02784	#N/A	Unique	1.27302	High	0.000164	0.009639
MIA3	375056	1034558408	XP_006711367.2	672	Yes	Yes	19	NAS	LMGDDHP	ASRDSVE	No	High	[K].IQQESLGSAPLMGDDHPNASR.[D]	1xTMT6plex [N-Term]; 1xOxidation [M12(100)]; 1xDeamidated [N18(100)]	2.49828e-08	0	1	7	3	1034558408	1034558408 [655-675]	0	2469.19	M12(Oxidation): 100; N18(Deamidated): 100	8.7	6.1	6.7	4.8	6.3	7.5	7.16667	6.2	0.865116	#N/A	Unique	4.34184	High	0	8.641e-12
MIA3	375056	1034558408	XP_006711367.2	333	Yes	Yes	4	NSS	SENNKTS	SSQVSNE	No	High	[K].TSNSSQVSNEQDKIDAYK.[L]	2xTMT6plex [K13; K18]; 1xDeamidated [N9(100)]	0.0756384	0.00173548	1	7	3	1034558408	1034558408 [331-348]	1	2473.25	N9(Deamidated): 100	14	12.7	12.5	13.4	13.5	12.4	13.0667	13.1	1.00255	#N/A	Unique	1.65484	High	0.0007256	0.0229
MIA3	375056	1034558408	XP_006711367.2	672	Yes	Yes	20	NAS	LMGDDHP	ASRDSVE	No	High	[R].KIQQESLGSAPLMGDDHPNASRDSVEGDALVNGAK.[L]	3xTMT6plex [K1; N-Term; K35]; 1xOxidation [M13(100)]; 2xDeamidated [N19(100); N32(100)]	0.050799	0.000598249	1	7	1	1034558408	1034558408 [654-688]	2	4312.2	M13(Oxidation): 100; N19(Deamidated): 100; N32(Deamidated): 100		8.3	4.3	13.1	6.6	12.8	6.3	10.8333	1.71958	#N/A	Unique	2.19964	High	0.000164	0.007142
MICA	100507436	4557751	NP_000238.1	79	Yes	Yes	15	NKT	WAEDVLG	KTWDRET	Yes	High	[R].AKPQGQWAEDVLGNK.[T]	3xTMT6plex [N-Term; K2; K15]; 1xDeamidated [N14(100)]	0.000454678	0	1	2	2	4557751	4557751 [66-80]	0	2329.31	N14(Deamidated): 100	19.2	9.8	10.2	23.9	12.9	42.8	13.0667	26.5333	2.03061	#N/A	Unique	1.95215	High	0	8.913e-06
MINPP1	9562	19923761	NP_004888.2	242	Yes	Yes	9	NAT	FLTEVEK	ATALYHV	Yes	High	[K].FLTEVEKNATALYHVEAFK.[T]	3xTMT6plex [N-Term; K7; K19]; 1xDeamidated [N8(100)]	0.00863647	0	1	5	1	19923761	19923761 [235-253]	1	2898.62	N8(Deamidated): 100	35.6	21	22.1	18.2	27.2	30.7	26.2333	25.3667	0.966963	#N/A	Unique	2.56453	High	0	0.0005705
MINPP1	9562	19923761	NP_004888.2	242	Yes	Yes	9	NAT	FLTEVEK	ATALYHV	Yes	High	[K].FLTEVEKNATALYHVEAFK.[T]	2xTMT6plex [K7; K19]; 1xDeamidated [N8(100)]	0.00021828	0	1	5	4	19923761	19923761 [235-253]	1	2669.46	N8(Deamidated): 100	21.3	11.1	13.8	13	19.6	15.4	15.4	16	1.03896	#N/A	Unique	2.39691	High	0	3.161e-06
MME	4311	116256331	NP_009219.2	285	Yes	Yes	5	NAT	ELEKEIA	ATAKPED	Yes	High	[K].EIANATAKPEDR.[N]	2xTMT6plex [N-Term; K8]; 1xDeamidated [N4(100)]	0.000369947	0	1	1	7	116256331	116256331 [282-293]	0	1773.97	N4(Deamidated): 100	63.8	7.6	15.6	9.7	20.6	95	29	41.7667	1.44023	1.14	Unique	2.35247	High	0	6.655e-06
MME	4311	116256331	NP_009219.2	285	Yes	Yes	5	NAT	ELEKEIA	ATAKPED	Yes	High	[K].EIANATAKPEDR.[N]	1xTMT6plex [K8]; 1xDeamidated [N4(100)]	0.0127233	0	1	1	3	116256331	116256331 [282-293]	0	1544.81	N4(Deamidated): 100	13.7	5.9	10.1	4.2	10.5	17.9	9.9	10.8667	1.09764	1.14	Unique	1.86699	High	0	0.001582
MME	4311	116256331	NP_009219.2	285	Yes	Yes	5	NAT	ELEKEIA	ATAKPED	Yes	High	[K].EIANATAKPEDRNDPMLLYNK.[M]	3xTMT6plex [N-Term; K8; K21]; 1xOxidation [M16(100)]; 2xDeamidated [N4(100); N13(100)]	0.165315	0.00456631	1	1	1	116256331	116256331 [282-302]	1	3108.65	N4(Deamidated): 100; N13(Deamidated): 100; M16(Oxidation): 100	32.7	9.4	12.2	11.6	10	35.3	18.1	18.9667	1.04788	1.14	Unique	1.59986	High	0.001589	0.04038
MME	4311	116256331	NP_009219.2	285	Yes	No	5	NAT	ELEKEIA	ATAKPED	Yes	High	[K].EIANATAKPEDRNDPMLLYNK.[M]	3xTMT6plex [N-Term; K8; K21]; 1xOxidation [M16(100)]; 1xDeamidated [N4(100)]	1.17032e-05	0	1	1	8	116256331	116256331 [282-302]	1	3107.67	N4(Deamidated): 50; N13(Deamidated): 50; M16(Oxidation): 100	92.4	11.2	27.9	22.9	24.5	111.3	43.8333	52.9	1.20684	1.14	Unique	2.55773	High	0	0.002674
MME	4311	116256331	NP_009219.2	285	Yes	Yes	11	NAT	ELEKEIA	ATAKPED	Yes	High	[K].VMELEKEIANATAKPEDR.[N]	2xTMT6plex [K6; K14]; 1xOxidation [M2(100)]; 1xDeamidated [N10(100)]	0.00170823	0	1	1	2	116256331	116256331 [276-293]	1	2519.34	M2(Oxidation): 100; N10(Deamidated): 100	12.4	4.2	5.1	5.6	6.2	10.6	7.23333	7.46667	1.03226	1.14	Unique	1.77137	High	0	5.779e-05
MME	4311	116256331	NP_009219.2	145	Yes	Yes	5	NES	ALYRSCI	ESAIDSR	Yes	High	[R].SCINESAIDSR.[G]	1xCarbamidomethyl [C2]; 1xTMT6plex [N-Term]; 1xDeamidated [N4(100)]	0.00106258	0	1	1	4	116256331	116256331 [142-152]	0	1481.71	N4(Deamidated): 100	63.6	7.1	23.2	16.9	12.7	56.3	31.3	28.6333	0.914803	1.14	Unique	2.35279	High	0	7.038e-05
MPZL1	9019	4506357	NP_003944.1	130	Yes	No	15	NGT	ENMQFIH	GTYICDV	Yes	High	[K].DASINIENMQFIHNGTYICDVK.[N]	1xCarbamidomethyl [C19]; 2xTMT6plex [N-Term; K22]; 1xOxidation [M9(100)]; 1xDeamidated [N]	0.000654638	0	1	2	1	4506357	4506357 [117-138]	0	3057.51	N8(Deamidated): 50; M9(Oxidation): 100; N14(Deamidated): 50	16.8	12.9	14.4	19.3	10.8	16.5	14.7	15.5333	1.05669	1.14	Unique	2.54077	High	0	1.489e-05
MPZL1	9019	4506357	NP_003944.1	130	Yes	Yes	15	NGT	ENMQFIH	GTYICDV	Yes	High	[K].DASINIENMQFIHNGTYICDVK.[N]	1xCarbamidomethyl [C19]; 1xTMT6plex [K22]; 1xOxidation [M9(100)]; 1xDeamidated [N]	0.217883	0.00926046	1	2	4	4506357	4506357 [117-138]	0	2828.34	M9(Oxidation): 100; N14(Deamidated): 98.09	8.3	7.8	6.3	8.3	5	9.1	7.46667	7.46667	1	1.14	Unique	1.11677	High	0.004388	0.07929
MPZL1	9019	4506357	NP_003944.1	50	Yes	Yes	7	NGT	PKEIFVA	GTQGKLT	Yes	High	[K].EIFVANGTQGK.[L]	2xTMT6plex [N-Term; K11]; 1xDeamidated [N6(100)]	8.77634e-06	0	1	3	8	4506357	4506357 [45-55]	0	1622.92	N6(Deamidated): 100	45.6	43.8	39.9	47.1	24.5	43.8	43.1	38.4667	0.892498	1.14	Unique	3.03976	High	0	3.398e-08
MPZL1	9019	4506357	NP_003944.1	50	Yes	Yes	7	NGT	PKEIFVA	GTQGKLT	Yes	High	[K].EIFVANGTQGK.[L]	1xTMT6plex [K11]; 1xDeamidated [N6(100)]	0.00740889	0	1	3	4	4506357	4506357 [45-55]	0	1393.75	N6(Deamidated): 100	22.7	18.5	18	16.3	14.8	17.1	19.7333	16.0667	0.814189	1.14	Unique	2.81068	High	0	0.001131
MPZL2	10205	21536337	NP_658911.1	39	Yes	Yes	7	NGT	SRVLEAV	GTDARLK	Yes	High	[R].VLEAVNGTDAR.[L]	1xTMT6plex [N-Term]; 1xDeamidated [N6(100)]	3.64828e-06	0	1	1	7	21536337	21536337 [34-44]	0	1374.74	N6(Deamidated): 100	55.5	496.9	23	17.6	56.1	47.7	191.8	40.4667	0.210984	#N/A	Unique	3.76799	High	0	3.598e-08
MRC2	9902	110624774	NP_006030.2	1134	Yes	Yes	26	NGT	GTELSYL	GTFRLLQ	No	High	[K].GTDPSLSPSPAALPPAPGTELSYLNGTFR.[L]	1xTMT6plex [N-Term]; 1xDeamidated [N25(100)]	7.39093e-12	0	1	1	6	110624774	110624774 [1110-1138]	0	3143.61	N25(Deamidated): 100	410.2	257.3	284.4	400.9	381.7	303.6	317.3	362.067	1.14109	1.25	Unique	7.56961	High	0	8.981e-17
MRC2	9902	110624774	NP_006030.2	364	Yes	Yes	5	NAT	YVCKKKP	ATAEPTP	Yes	High	[K].KKPNATAEPTPPDR.[W]	3xTMT6plex [K1; N-Term; K2]; 1xDeamidated [N4(100)]	8.81695e-05	0	1	2	7	110624774	110624774 [361-374]	1	2210.27	N4(Deamidated): 100	17	6.8	17.1	6.5	37.8	11	13.6333	18.4333	1.35208	1.25	Unique	3.04823	High	0	9.123e-06
MRC2	9902	110624774	NP_006030.2	364	Yes	Yes	5	NAT	YVCKKKP	ATAEPTP	Yes	High	[K].KKPNATAEPTPPDR.[W]	2xTMT6plex [K1; K2]; 1xDeamidated [N4(100)]	0.00099358	0	1	2	8	110624774	110624774 [361-374]	1	1981.11	N4(Deamidated): 100	21	9.4	24.5	18.7	54	17.7	18.3	30.1333	1.64663	1.25	Unique	2.05945	High	0	0.0004815
MRC2	9902	110624774	NP_006030.2	364	Yes	Yes	4	NAT	YVCKKKP	ATAEPTP	Yes	High	[K].KPNATAEPTPPDR.[W]	2xTMT6plex [K1; N-Term]; 1xDeamidated [N3(100)]	0.0165391	0	1	2	3	110624774	110624774 [362-374]	0	1853.02	N3(Deamidated): 100	14.9	11.3	21.8	15.1	36	15	16	22.0333	1.37708	1.25	Unique	1.68371	High	0	0.005109
MRC2	9902	110624774	NP_006030.2	140	Yes	Yes	4	NIS	LLGARTS	ISKPGTL	Yes	High	[R].TSNISKPGTLER.[G]	1xTMT6plex [K6]; 1xDeamidated [N3(100)]	0.00692806	0	1	2	6	110624774	110624774 [138-149]	0	1532.85	N3(Deamidated): 100	11.8	6.9	14.3	7.2	27	9.3	11	14.5	1.31818	1.25	Unique	1.90465	High	0	0.0004181
MRC2	9902	110624774	NP_006030.2	140	Yes	Yes	4	NIS	LLGARTS	ISKPGTL	Yes	High	[R].TSNISKPGTLER.[G]	2xTMT6plex [N-Term; K6]; 1xDeamidated [N3(100)]	0.0560095	0.000598249	1	2	2	110624774	110624774 [138-149]	0	1762.01	N3(Deamidated): 100	26	10.8	19	15.5	39.6	14.7	18.6	23.2667	1.2509	1.25	Unique	1.22913	High	0.000164	0.00823
MRC2	9902	110624774	NP_006030.2	69	Yes	Yes	7	NTS	VRVTPAC	TSLPAQR	Yes	High	[R].VTPACNTSLPAQR.[W]	1xCarbamidomethyl [C5]; 1xTMT6plex [N-Term]; 1xDeamidated [N6(100)]	0.00558362	0	1	2	6	110624774	110624774 [64-76]	0	1644.86	N6(Deamidated): 100	20.8	11.6	24.3	18.6	40	18.7	18.9	25.7667	1.36332	1.25	Unique	2.4791	High	0	0.0003087
MSLN	10232	1034593353	XP_016878342.1	533	Yes	Yes	7	NVS	LKALSQQ	VSMDLAT	No	High	[K].ALSQQNVSMDLATFMK.[L]	2xTMT6plex [N-Term; K16]; 2xOxidation [M9(100); M15(100)]; 1xDeamidated [N6(100)]	0.00410814	0	1	8	3	1034593353	1034593353 [528-543]	0	2275.17	N6(Deamidated): 100; M9(Oxidation): 100; M15(Oxidation): 100	9.8	5.8	5	16.7	6.9	8.1	6.86667	10.5667	1.53883	#N/A	Unique	2.35183	High	0	0.0001999
MSLN	10232	1034593353	XP_016878342.1	506	Yes	Yes	8	NGS	RLAFQNM	GSEYFVK	No	High	[R].LAFQNMNGSEYFVK.[I]	2xTMT6plex [N-Term; K14]; 1xOxidation [M6(100)]; 1xDeamidated [N]	0.0160732	0	1	8	3	1034593353	1034593353 [500-513]	0	2123.09	M6(Oxidation): 100; N7(Deamidated): 99.55	4.3	10.3	4.7	18.9	5.7	4.6	6.43333	9.73333	1.51295	#N/A	Unique	1.88825	High	0	0.001373
MST1R	4486	578806145	XP_005265227.2	458	Yes	Yes	4	NVT	LYVTRLD	VTVAHMG	No	High	[R].LDNVTVAHMGTMDGR.[I]	1xTMT6plex [N-Term]; 2xOxidation [M9(100); M12(100)]; 1xDeamidated [N3(100)]	0.00345683	0	1	8	3	578806145	578806145 [456-470]	0	1878.89	N3(Deamidated): 100; M9(Oxidation): 100; M12(Oxidation): 100	14.7	22.8	19.1	33.2	20.6	14.6	18.8667	22.8	1.20848	#N/A	Unique	2.47082	High	0	0.0001559
NAAA	27163	1034639356	XP_016863516.1	37	Yes	Yes	3	NVS	PPAAPRF	VSLDSVP	Yes	High	[R].FNVSLDSVPELR.[W]	1xTMT6plex [N-Term]; 1xDeamidated [N2(100)]	9.11967e-06	0	1	11	1	1034639356	1034639356 [36-47]	0	1605.87	N2(Deamidated): 100	79.2	37.3	59.1	52.5	67.3	33.3	58.5333	51.0333	0.871868	#N/A	Unique	3.6275	High	0	3.575e-08
NAGLU	4669	66346698	NP_000254.2	261	Yes	Yes	7	NVT	TRVFPQV	VTKMGSW	Yes	High	[R].VFPQVNVTK.[M]	2xTMT6plex [N-Term; K9]; 1xDeamidated [N6(100)]	0.0342877	0	1	2	3	66346698	66346698 [256-264]	0	1490.9	N6(Deamidated): 100	29.3	31.3	24.1	27.2	24.8	35.5	28.2333	29.1667	1.03306	#N/A	Unique	2.16937	High	0	0.00407
NCAM1	4684	336285440	NP_001229536.1	485	Yes	Yes	10	NYS	GQLLPSS	YSNIKIY	No	High	[R].DGQLLPSSNYSNIK.[I]	1xTMT6plex [K14]; 1xDeamidated [N9(100)]	0.00689493	0	1	5	3	336285440	336285440 [477-490]	0	1765.92	N9(Deamidated): 100	6.6	5.6	5.4	8.7	7.9	24.5	5.86667	13.7	2.33523	#N/A	Unique	2.19024	High	0	0.0004155
NCEH1	57552	226423947	NP_001139748.1	310	Yes	Yes	14	NHT	VQAMIVN	HTSLDVE	No	High	[K].GNYDFVQAMIVNNHTSLDVEEAAAVR.[A]	1xTMT6plex [N-Term]; 1xOxidation [M9(100)]; 1xDeamidated [N13(99.5)]	1.61556e-12	0	1	3	31	226423947	226423947 [298-323]	0	3109.51	M9(Oxidation): 100; N13(Deamidated): 100	92.8	61.4	97.5	183.6	95.8	108.9	83.9	129.433	1.54271	1.13	Unique	8.51838	High	0	1.051e-17
NCEH1	57552	226423947	NP_001139748.1	310	Yes	Yes	14	NHT	VQAMIVN	HTSLDVE	No	High	[K].GNYDFVQAMIVNNHTSLDVEEAAAVR.[A]	1xTMT6plex [N-Term]; 1xOxidation [M9(100)]; 2xDeamidated [N12(98.8); N13(98.8)]	0.00137007	0	1	3	1	226423947	226423947 [298-323]	0	3110.49	M9(Oxidation): 100; N12(Deamidated): 100; N13(Deamidated): 100	6.5	8.3	12.7	6.8	15.1	9.6	9.16667	10.5	1.14545	1.13	Unique	3.14525	High	0	4.24e-05
NCLN	56926	51873031	NP_064555.2	428	Yes	Yes	5	NLT	ALTRVIY	LTEKGTP	Yes	High	[R].VIYNLTEK.[G]	2xTMT6plex [N-Term; K8]; 1xDeamidated [N4(100)]	0.000371726	0	1	2	5	51873031	51873031 [425-432]	0	1438.86	N4(Deamidated): 100	41	38.3	30	37.6	31.2	47.8	36.4333	38.8667	1.06679	1.05	Unique	3.0772	High	0	1.857e-05
NCLN	56926	51873031	NP_064555.2	428	Yes	Yes	5	NLT	ALTRVIY	LTEKGTP	Yes	High	[R].VIYNLTEK.[G]	1xTMT6plex [K8]; 1xDeamidated [N4(100)]	0.0799271	0.00173548	1	2	4	51873031	51873031 [425-432]	0	1209.69	N4(Deamidated): 100	11.5	11.6	8.6	11.2	10	11.2	10.5667	10.8	1.02208	1.05	Unique	1.89116	High	0.0004721	0.01385
NCSTN	23385	24638433	NP_056146.1	612	Yes	Yes	16	NET	VQGPLHS	ETDRLPR	Yes	High	[K].DLYEYSWVQGPLHSNETDRLPR.[C]	1xTMT6plex [N-Term]; 1xDeamidated [N15(100)]	6.54995e-06	0	1	3	3	24638433	24638433 [598-619]	1	2905.43	N15(Deamidated): 100	4.1	7.6	3.2	4.7	6.2	6.1	4.96667	5.66667	1.14094	1.13	Unique	3.19066	High	0	1.071e-07
NCSTN	23385	24638433	NP_056146.1	45	Yes	Yes	7	NKT	RKIYIPL	KTAPCVR	Yes	High	[K].IYIPLNK.[T]	2xTMT6plex [N-Term; K7]; 1xDeamidated [N6(100)]	0.103242	0.00222925	1	5	2	24638433	24638433 [40-46]	0	1319.83	N6(Deamidated): 100	22.8	24.7	17.1	22.5	25.1	26	21.5333	24.5333	1.13932	1.13	Unique	2.02892	High	0.0005939	0.02011
NCSTN	23385	24638433	NP_056146.1	506	Yes	Yes	11	NFS	YELAGGT	FSDTVQA	Yes	High	[R].ALYELAGGTNFSDTVQADPQTVTR.[L]	1xTMT6plex [N-Term]; 1xDeamidated [N10(100)]	1.27661e-09	0	1	4	12	24638433	24638433 [497-520]	0	2784.39	N10(Deamidated): 100	27.6	27.7	24.3	37.3	26.6	30	26.5333	31.3	1.17965	1.13	Unique	4.89833	High	0	1.684e-13
NCSTN	23385	24638433	NP_056146.1	435	Yes	Yes	2	NIS	QRFLRAR	ISGVVLA	Yes	High	[R].NISGVVLADHSGAFHNK.[Y]	1xTMT6plex [K17]; 1xDeamidated [N1(100)]	1.31331e-06	0	1	4	3	24638433	24638433 [435-451]	0	1996.04	N1(Deamidated): 100	13.9	11.9	10.6	10.2	9	11.6	12.1333	10.2667	0.846154	1.13	Unique	3.72528	High	0	2.312e-09
NCSTN	23385	24638433	NP_056146.1	417	Yes	Yes	4	NQS	AVILRRP	QSQPLPP	Yes	High	[R].RPNQSQPLPPSSLQR.[F]	1xTMT6plex [N-Term]; 1xDeamidated [N3(100)]	6.91089e-12	0	1	4	21	24638433	24638433 [415-429]	0	1935.06	N3(Deamidated): 100	70.7	67.9	46.4	84.9	53	77	61.6667	71.6333	1.16162	1.13	Unique	5.40948	High	0	3.685e-14
NCSTN	23385	24638433	NP_056146.1	387	Yes	Yes	17	NES	TDPVSQK	ESVRNQV	Yes	High	[R].TSLELWMHTDPVSQKNESVR.[N]	2xTMT6plex [N-Term; K15]; 1xOxidation [M7(100)]; 1xDeamidated [N16(100)]	7.0374e-05	0	1	5	7	24638433	24638433 [372-391]	1	2832.46	M7(Oxidation): 100; N16(Deamidated): 100	16.6	14.9	9.5	20.6	12.8	14.4	13.6667	15.9333	1.16585	1.13	Unique	3.04128	High	0	6.4e-07
NCSTN	23385	24638433	NP_056146.1	387	Yes	Yes	17	NES	TDPVSQK	ESVRNQV	Yes	High	[R].TSLELWMHTDPVSQKNESVR.[N]	1xTMT6plex [K15]; 1xOxidation [M7(100)]; 1xDeamidated [N16(100)]	0.00242423	0	1	5	7	24638433	24638433 [372-391]	1	2603.3	M7(Oxidation): 100; N16(Deamidated): 100	17	12.7	11.4	11.4	12	13	13.7	12.1333	0.885645	1.13	Unique	2.14002	High	0	9.446e-05
NECTIN1	5818	42560237	NP_002846.3	286	Yes	Yes	17	NGS	EYHWTTL	GSLPKGV	Yes	High	[K].ADANPPATEYHWTTLNGSLPK.[G]	2xTMT6plex [N-Term; K21]; 1xDeamidated [N16(99.2)]	0.0119002	0	1	3	2	42560237	42560237 [271-291]	0	2742.41	N16(Deamidated): 100	7.2	20.4	4.9	7.6	4.8	7.8	10.8333	6.73333	0.621538	#N/A	Unique	1.73089	High	0	0.0008948
NECTIN1	5818	42560237	NP_002846.3	297	Yes	Yes	7	NRT	PKGVEAQ	RTLFFKG	Yes	High	[K].GVEAQNR.[T]	1xTMT6plex [N-Term]; 1xDeamidated [N6(100)]	0.064661	0.000598249	1	3	1	42560237	42560237 [292-298]	0	1003.54	N6(Deamidated): 100	47.9	225.4	31.9	18.7	45.4	94.5	101.733	52.8667	0.519659	#N/A	Unique	2.65313	High	0.000164	0.01016
NECTIN1	5818	42560237	NP_002846.3	202	Yes	Yes	15	NGT	YQEIRNP	GTVTVIS	Yes	High	[R].LKGEAEYQEIRNPNGTVTVISR.[Y]	2xTMT6plex [N-Term; K2]; 1xDeamidated [N14(99.6)]	0.00282627	0	1	3	3	42560237	42560237 [189-210]	2	2933.61	N14(Deamidated): 99.58	9.6	47	5.9	15.5	6.7	10	20.8333	10.7333	0.5152	#N/A	Unique	1.55692	High	0	0.0001238
NECTIN1	5818	42560237	NP_002846.3	202	Yes	Yes	4	NGT	YQEIRNP	GTVTVIS	Yes	High	[R].NPNGTVTVISR.[Y]	1xTMT6plex [N-Term]; 1xDeamidated [N3(100)]	0.0188061	0	1	3	2	42560237	42560237 [200-210]	0	1387.77	N3(Deamidated): 100	14.2	78.5	8.6	10.2	10	25.1	33.7667	15.1	0.447187	#N/A	Unique	2.2902	High	0	0.001718
NEGR1	257194	66346706	NP_776169.2	275	Yes	Yes	14	NFS	QQGIIIQ	FSTRSIL	Yes	High	[K].KLFNGQQGIIIQNFSTR.[S]	2xTMT6plex [K1; N-Term]; 2xDeamidated [N4(100); N13(100)]	9.20758e-06	0	1	2	3	66346706	66346706 [263-279]	1	2424.37	N4(Deamidated): 100; N13(Deamidated): 100	14.4	5	6.8	10.5	26	7.8	8.73333	14.7667	1.69084	#N/A	Unique	2.6807	High	0	4.225e-07
NEMP1	23306	767973541	XP_011536358.1	173	Yes	Yes	5	NDT	SFLKEKL	DTYVNVG	No	High	[K].EKLNDTYVNVGLYSTK.[T]	3xTMT6plex [N-Term; K2; K16]; 2xDeamidated [N4(100); N9(100)]	0.00193505	0	1	4	1	767973541	767973541 [170-185]	1	2533.4	N4(Deamidated): 100; N9(Deamidated): 100	28.3	21	20.5	15.9	15	31.6	23.2667	20.8333	0.895415	#DIV/0!	Unique	2.90726	High	0	6.905e-05
NEMP1	23306	767973541	XP_011536358.1	173	Yes	Yes	5	NDT	SFLKEKL	DTYVNVG	No	High	[K].EKLNDTYVNVGLYSTK.[T]	3xTMT6plex [N-Term; K2; K16]; 1xDeamidated [N4(100)]	1.38527e-10	0	1	4	4	767973541	767973541 [170-185]	1	2532.42	N4(Deamidated): 100	53.6	33.4	36.1	21	24.8	57.8	41.0333	34.5333	0.841592	#DIV/0!	Unique	5.67875	High	0	5.65e-15
NEMP1	23306	767973541	XP_011536358.1	173	Yes	Yes	5	NDT	SFLKEKL	DTYVNVG	No	High	[K].EKLNDTYVNVGLYSTK.[T]	2xTMT6plex [K2; K16]; 1xDeamidated [N4(99.6)]	0.131795	0.00315632	1	4	3	767973541	767973541 [170-185]	1	2303.25	N4(Deamidated): 99.65	12.2	10.7	11.8	9	9	12.8	11.5667	10.2667	0.887608	#DIV/0!	Unique	1.3114	High	0.00084	0.0289
NEMP1	23306	767973541	XP_011536358.1	173	Yes	Yes	3	NDT	SFLKEKL	DTYVNVG	No	High	[K].LNDTYVNVGLYSTK.[T]	2xTMT6plex [N-Term; K14]; 1xDeamidated [N2(100)]	0.00191658	0	1	4	2	767973541	767973541 [172-185]	0	2046.12	N2(Deamidated): 100	10.6	5	4.9	3.7	3.7	8.6	6.83333	5.33333	0.780488	#DIV/0!	Unique	2.15174	High	0	6.816e-05
NEMP1	23306	767973541	XP_011536358.1	173	Yes	Yes	3	NDT	SFLKEKL	DTYVNVG	No	High	[K].LNDTYVNVGLYSTK.[T]	1xTMT6plex [K14]; 1xDeamidated [N2(99.5)]	0.201827	0.0078852	1	4	2	767973541	767973541 [172-185]	0	1816.95	N7(Deamidated): 99.53	14.5	12.1	11.3	11.2	12.6	12.9	12.6333	12.2333	0.968338	#DIV/0!	Unique	1.3416	High	0.002411	0.05494
NEO1	4756	767984296	XP_011519930.1	210	Yes	Yes	11	NAT	SGMLVIS	ATEGDGG	Yes	High	[K].LPSGMLVISNATEGDGGLYR.[C]	1xTMT6plex [N-Term]; 1xOxidation [M5(100)]; 1xDeamidated [N10(100)]	4.37773e-06	0	1	16	3	767984296	767984296 [201-220]	0	2296.17	M5(Oxidation): 100; N10(Deamidated): 100	11.2	8.8	5.6	12	6.9	10.2	8.53333	9.7	1.13672	#N/A	Unique	3.62301	High	0	1.267e-08
NEO1	4756	767984296	XP_011519930.1	509	Yes	Yes	6	NTS	IARERVE	TSHPGEM	No	High	[R].ERVENTSHPGEMQVTIQNLMPATVYIFR.[V]	1xTMT6plex [N-Term]; 2xOxidation [M12(100); M20(100)]; 1xDeamidated [N5(100)]	1.26368e-05	0	1	16	2	767984296	767984296 [505-532]	1	3522.76	N5(Deamidated): 100; M12(Oxidation): 100; M20(Oxidation): 100	8.9	5.7	4.4	20.6	8.6	6.9	6.33333	12.0333	1.9	#N/A	Unique	2.9418	High	0	5.672e-08
NEO1	4756	767984296	XP_011519930.1	659	Yes	Yes	13	NLS	VPSAAPQ	LSLEVRN	No	High	[R].TLSDVPSAAPQNLSLEVR.[N]	1xTMT6plex [N-Term]; 1xDeamidated [N12(100)]	0.00373247	0	1	16	4	767984296	767984296 [648-665]	0	2127.15	N12(Deamidated): 100	8.5	3.4	3.9	4	3.7	5.3	5.26667	4.33333	0.822785	#N/A	Unique	1.67538	High	0	0.0007771
NEO1	4756	767984296	XP_011519930.1	490	Yes	Yes	11	NLT	ASDPHGD	LTYSVFY	No	High	[R].TPASDPHGDNLTYSVFYTK.[E]	2xTMT6plex [N-Term; K19]; 1xDeamidated [N10(100)]	1.38426e-05	0	1	16	5	767984296	767984296 [481-499]	0	2572.3	N10(Deamidated): 100	36.5	19.3	18.7	29.3	19.4	25.8	24.8333	24.8333	1	#N/A	Unique	2.99409	High	0	6.425e-08
NOMO2	283820	51944971	NP_001004060.1	618	Yes	Yes	8	NLS	RENVGIY	LSKGVNR	Yes	High	[R].ENVGIYNLSK.[G]	2xTMT6plex [N-Term; K10]; 1xDeamidated [N7(100)]	2.82887e-05	0	1	6	5	51944971	51944971 [612-621]	0	1595.9	N7(Deamidated): 100	31.7	24.4	19.4	22.7	19.7	57.4	25.1667	33.2667	1.32185	1.18	Unique	3.20714	High	0	1.773e-07
NOMO2	283820	51944971	NP_001004060.1	618	Yes	Yes	8	NLS	RENVGIY	LSKGVNR	Yes	High	[R].ENVGIYNLSK.[G]	1xTMT6plex [K10]; 1xDeamidated [N7(100)]	0.0254743	0	1	6	4	51944971	51944971 [612-621]	0	1366.74	N7(Deamidated): 100	16	12.8	9.4	9	12.8	17.5	12.7333	13.1	1.0288	1.18	Unique	2.34596	High	0	0.00265
NOMO2	283820	51944971	NP_001004060.1	618	Yes	Yes	8	NLS	RENVGIY	LSKGVNR	Yes	High	[R].ENVGIYNLSK.[G]	2xTMT6plex [N-Term; K10]; 2xDeamidated [N2(100); N7(100)]	0.000670525	0	1	6	3	51944971	51944971 [612-621]	0	1596.89	N2(Deamidated): 100; N7(Deamidated): 100	28.6	28.1	18.7	28.4	21.4	43.7	25.1333	31.1667	1.24005	1.18	Unique	2.01122	High	0	9.24e-05
NOMO2	283820	51944971	NP_001004060.1	369	Yes	Yes	4	NIT	DGSFRLE	ITTGTYT	No	High	[R].LENITTGTYTIHAQK.[E]	2xTMT6plex [N-Term; K15]; 1xDeamidated [N3(100)]	2.70975e-06	0	1	7	4	51944971	51944971 [367-381]	0	2149.19	N3(Deamidated): 100	17.5	10.8	8.2	7.7	11	19.1	12.1667	12.6	1.03562	1.18	Unique	3.58029	High	0	6.444e-09
NOMO2	283820	51944971	NP_001004060.1	369	Yes	Yes	4	NIT	DGSFRLE	ITTGTYT	No	High	[R].LENITTGTYTIHAQK.[E]	1xTMT6plex [K15]; 1xDeamidated [N3(100)]	0.00178356	0	1	7	4	51944971	51944971 [367-381]	0	1920.03	N3(Deamidated): 100	15.5	10.5	11.3	15.3	12.4	13.6	12.4333	13.7667	1.10724	1.18	Unique	2.42191	High	0	0.0009123
NOMO2	283820	51944971	NP_001004060.1	218	Yes	Yes	19	NVS	PLIVAGY	VSGSVRS	Yes	High	[R].VTNSNANAASPLIVAGYNVSGSVR.[S]	1xTMT6plex [N-Term]; 3xDeamidated [N5(99.7); N7(100); N18(100)]	2.20439e-05	0	1	7	6	51944971	51944971 [201-224]	0	2593.33	N3(Deamidated): 50; N5(Deamidated): 50; N7(Deamidated): 100; N18(Deamidated): 100	14.6	13.2	11.5	17.3	11.6	12.7	13.1	13.8667	1.05852	1.18	Unique	3.14923	High	0	1.245e-07
NOMO2	283820	51944971	NP_001004060.1	218	Yes	Yes	19	NVS	PLIVAGY	VSGSVRS	Yes	High	[R].VTNSNANAASPLIVAGYNVSGSVR.[S]	1xTMT6plex [N-Term]; 1xDeamidated [N18(100)]	5.4348e-09	0	1	7	4	51944971	51944971 [201-224]	0	2591.36	N18(Deamidated): 99.24	99.7	114.3	83.1	239.3	84.2	100.1	99.0333	141.2	1.42578	1.18	Unique	4.97274	High	0	0.001432
NOMO2	283820	51944971	NP_001004060.1	218	Yes	Yes	19	NVS	PLIVAGY	VSGSVRS	Yes	High	[R].VTNSNANAASPLIVAGYNVSGSVR.[S]	1xTMT6plex [N-Term]; 2xDeamidated [N7(99.7); N18(100)]	5.20289e-06	0	1	7	7	51944971	51944971 [201-224]	0	2592.35	N5(Deamidated): 99.75; N18(Deamidated): 100	18.9	16.5	14.1	22.3	16.6	23.3	16.5	20.7333	1.25657	1.18	Unique	3.68432	High	0	2.18e-08
NPC1	4864	530413812	XP_005258334.1	615	Yes	Yes	7	NLT	VKNYKNP	LTISFTA	No	High	[K].NYKNPNLTISFTAER.[S]	2xTMT6plex [N-Term; K3]; 2xDeamidated [N6(100); N]	0.0729038	0.00117085	1	10	1	530413812	530413812 [610-624]	1	2228.2	N1(Deamidated): 50; N4(Deamidated): 50; N6(Deamidated): 100	20.8	22.9	24.7	26.7	22.2	20.6	22.8	23.1667	1.01608	1.1	Unique	1.45085	High	0.0003202	0.01207
NPC1	4864	530413812	XP_005258334.1	615	Yes	Yes	7	NLT	VKNYKNP	LTISFTA	No	High	[K].NYKNPNLTISFTAER.[S]	2xTMT6plex [N-Term; K3]; 1xDeamidated [N6(100)]	5.32918e-06	0	1	10	3	530413812	530413812 [610-624]	1	2227.21	N6(Deamidated): 99.8	18.1	25.6	28.4	42.6	22.4	19.3	24.0333	28.1	1.16921	1.1	Unique	3.49865	High	0	1.677e-08
NPC1	4864	530413812	XP_005258334.1	615	Yes	Yes	7	NLT	VKNYKNP	LTISFTA	No	High	[K].NYKNPNLTISFTAER.[S]	1xTMT6plex [K3]; 1xDeamidated [N]	2.80228e-06	0	1	10	2	530413812	530413812 [610-624]	1	1998.05	N6(Deamidated): 100	13.7	13.4	21.1	20.2	19.3	13.5	16.0667	17.6667	1.09959	1.1	Unique	3.94296	High	0	6.753e-09
NPC1	4864	530413812	XP_005258334.1	1081	Yes	Yes	6	NVT	KARLIAS	VTETMGI	No	High	[R].LIASNVTETMGINGSAYR.[V]	1xTMT6plex [N-Term]; 1xOxidation [M10(100)]; 2xDeamidated [N5(100); N13(100)]	0.00221312	0	1	10	3	530413812	530413812 [1077-1094]	0	2144.07	N5(Deamidated): 100; M10(Oxidation): 100; N13(Deamidated): 100	8.3	7.6	5.9	5.3	6.9	7.9	7.26667	6.7	0.922018	1.1	Unique	2.65013	High	0	8.358e-05
NPC1	4864	530413812	XP_005258334.1	1081	Yes	Yes	6	NVT	KARLIAS	VTETMGI	No	High	[R].LIASNVTETMGINGSAYR.[V]	1xTMT6plex [N-Term]; 1xOxidation [M10(100)]; 1xDeamidated [N5(100)]	0.167507	0.00456631	1	10	1	530413812	530413812 [1077-1094]	0	2143.09	N5(Deamidated): 100; M10(Oxidation): 100	6.4	8.4	6.1	7.4	6.9	8.5	6.96667	7.6	1.09091	1.1	Unique	1.89662	High	0.001589	0.0413
NPC1	4864	530413812	XP_005258334.1	122	Yes	Yes	7	NVT	PRQSQFL	VTATEDY	Yes	High	[R].QSQFLNVTATEDYVDPVTNQTK.[T]	2xTMT6plex [N-Term; K22]; 2xDeamidated [N6(100); N19(100)]	4.63638e-05	0	1	9	6	530413812	530413812 [117-138]	0	2958.5	N6(Deamidated): 100; N19(Deamidated): 100	10.7	10.7	12.8	16.7	11.7	11.2	11.4	13.2	1.15789	1.1	Unique	3.36067	High	0	1.644e-06
NPC1	4864	530413812	XP_005258334.1	122	Yes	Yes	7	NVT	PRQSQFL	VTATEDY	Yes	High	[R].QSQFLNVTATEDYVDPVTNQTK.[T]	2xTMT6plex [N-Term; K22]; 1xDeamidated [N6(99.7)]	0.00012695	0	1	9	1	530413812	530413812 [117-138]	0	2957.51	N6(Deamidated): 99.69	9.6	7.8	9.4	11.9	10.2	8.1	8.93333	10.0667	1.12687	1.1	Unique	2.38762	High	0	1.472e-06
NPC1	4864	530413812	XP_005258334.1	122	Yes	Yes	7	NVT	PRQSQFL	VTATEDY	Yes	High	[R].QSQFLNVTATEDYVDPVTNQTK.[T]	1xTMT6plex [K22]; 2xDeamidated [N6(100); N19(100)]	0.0132187	0	1	9	2	530413812	530413812 [117-138]	0	2729.34	N6(Deamidated): 100; N19(Deamidated): 100	24.9	22.1	29.8	35.6	34.7	17.9	25.6	29.4	1.14844	1.1	Unique	2.33781	High	0	0.001042
NPC2	10577	1034585992	XP_016876419.1	58	Yes	Yes	8	NVT	KGQSYSV	VTFTSNI	No	High	[K].GQSYSVNVTFTSNIQSK.[S]	2xTMT6plex [N-Term; K17]; 1xDeamidated [N7(100)]	2.72357e-08	0	1	2	17	1034585992	1034585992 [52-68]	0	2319.22	N7(Deamidated): 100	72.4	58	125.9	65.4	75.7	76.1	85.4333	72.4	0.847444	0.66	Unique	4.76084	High	0	9.751e-12
NPTN	27020	6912646	NP_036560.1	229	Yes	Yes	3	NAT	FVSAPKA	ATIEVKA	Yes	High	[K].ANATIEVK.[A]	2xTMT6plex [N-Term; K8]; 1xDeamidated [N2(100)]	6.70781e-05	0	1	5	15	6912646	6912646 [228-235]	0	1304.78	N2(Deamidated): 100	110.9	99.1	63.7	226.1	106	84.7	91.2333	138.933	1.52284	1.11	Unique	3.50183	High	0	4.035e-06
NPTN	27020	6912646	NP_036560.1	284	Yes	Yes	12	NTS	GMPMDIV	TSGRFFI	Yes	High	[K].KENGMPMDIVNTSGR.[F]	2xTMT6plex [K1; N-Term]; 2xOxidation [M5(100); M7(100)]; 1xDeamidated [N11(100)]	0.216048	0.00926046	1	5	2	6912646	6912646 [274-288]	1	2140.08	M5(Oxidation): 100; M7(Oxidation): 100; N11(Deamidated): 100	14.1	18.3	12.6	12.9	14.6	15.7	15	14.4	0.96	1.11	Unique	0.903236	High	0.002989	0.06071
NPTN	27020	6912646	NP_036560.1	284	Yes	Yes	12	NTS	GMPMDIV	TSGRFFI	Yes	High	[K].KENGMPMDIVNTSGR.[F]	1xTMT6plex [K1]; 2xOxidation [M5(100); M7(100)]; 2xDeamidated [N3(100); N11(100)]	0.00266823	0	1	5	5	6912646	6912646 [274-288]	1	1911.9	N3(Deamidated): 100; M5(Oxidation): 100; M7(Oxidation): 100; N11(Deamidated): 100	11.8	12.6	12.3	11.7	12.3	16.1	12.2333	13.3667	1.09264	1.11	Unique	1.97385	High	0	0.0001085
NPTN	27020	6912646	NP_036560.1	284	Yes	Yes	13	NTS	GMPMDIV	TSGRFFI	Yes	High	[R].KKENGMPMDIVNTSGR.[F]	3xTMT6plex [K1; N-Term; K2]; 2xOxidation [M6(100); M8(100)]; 1xDeamidated [N12(100)]	0.00932415	0	1	5	6	6912646	6912646 [273-288]	2	2497.34	M6(Oxidation): 100; M8(Oxidation): 100; N12(Deamidated): 100	13.2	16.3	12	17	15.1	15.7	13.8333	15.9333	1.15181	1.11	Unique	2.18634	High	0	0.0006339
NPTN	27020	6912646	NP_036560.1	284	Yes	Yes	13	NTS	GMPMDIV	TSGRFFI	Yes	High	[R].KKENGMPMDIVNTSGR.[F]	2xTMT6plex [K1; K2]; 2xOxidation [M6(100); M8(100)]; 2xDeamidated [N4(100); N12(100)]	0.00582984	0	1	5	9	6912646	6912646 [273-288]	2	2269.16	N4(Deamidated): 100; M6(Oxidation): 100; M8(Oxidation): 100; N12(Deamidated): 100	10.3	19.4	13	18.1	14.5	11.3	14.2333	14.6333	1.0281	1.11	Unique	2.14669	High	0	0.001896
NPTN	27020	6912646	NP_036560.1	197	Yes	Yes	3	NAS	ELSATRK	ASNMEYR	Yes	High	[R].KNASNMEYR.[I]	1xTMT6plex [K1]; 1xOxidation [M6(100)]; 1xDeamidated [N2(100)]	0.188408	0.00695865	1	5	5	6912646	6912646 [196-204]	1	1358.66	N2(Deamidated): 100; M6(Oxidation): 100	11.3	12.6	10	17.1	19	10.2	11.3	15.4333	1.36578	1.11	Unique	2.14963	High	0.004187	0.0765
NPTX1	4884	55770878	NP_002513.2	154	Yes	Yes	3	NSS	LEQYSRL	SSSQTNS	No	High	[R].LNSSSQTNSLK.[D]	1xTMT6plex [K11]; 1xDeamidated [N8(99.3)]	0.0149644	0	1	1	2	55770878	55770878 [153-163]	0	1408.75	N2(Deamidated): 100	9.4	9.1	27.8	15.6	7.6	16.3	15.4333	13.1667	0.853132	#N/A	Unique	1.89275	High	0	0.001243
NPTXR	23467	17402888	NP_055108.2	42	Yes	Yes	9	NAS	ALPGGAD	ASVASGA	No	High	[R].ALPGGADNASVASGAAASPGPQR.[S]	1xTMT6plex [N-Term]; 1xDeamidated [N8(100)]	0.00271991	0	1	1	2	17402888	17402888 [35-57]	0	2252.15	N8(Deamidated): 100	3.5	3.9		6	6	5	3.7	5.66667	1.53153	#N/A	Unique	2.00611	High	0	0.0001113
NRP1	8829	578818615	XP_006717584.1	261	Yes	Yes	7	NYS	AKEGFSA	YSVLQSS	Yes	High	[K].EGFSANYSVLQSSVSEDFK.[C]	1xTMT6plex [K19]; 1xDeamidated [N6(100)]	0.00458712	0	1	15	4	578818615	578818615 [256-274]	0	2324.11	N6(Deamidated): 100	14.9	9.3	7.4	24.4	21.1	12.3	10.5333	19.2667	1.82911	#N/A	Unique	2.27926	High	0	0.000234
NRP1	8829	578818615	XP_006717584.1	522	Yes	Yes	7	NGS	FKIGYSN	GSDWKMI	Yes	High	[K].IGYSNNGSDWK.[M]	1xTMT6plex [K11]; 1xDeamidated [N6(99.7)]	0.12657	0.00315632	1	15	1	578818615	578818615 [517-527]	0	1470.71	N6(Deamidated): 99.68	7.9	5.7	6.4	16.9	10.7	7.8	6.66667	11.8	1.77	#N/A	Unique	1.32791	High	0.00084	0.02712
NRP1	8829	578818615	XP_006717584.1	150	Yes	Yes	9	NYT	RGPECSQ	YTTPSGV	Yes	High	[K].RGPECSQNYTTPSGVIK.[S]	1xCarbamidomethyl [C5]; 2xTMT6plex [N-Term; K17]; 1xDeamidated [N8(100)]	0.00644738	0	1	14	2	578818615	578818615 [143-159]	1	2353.22	N8(Deamidated): 100	13.3	6.6	5.5	8	15.6	8.2	8.46667	10.6	1.25197	#N/A	Unique	1.70993	High	0	0.0003775
NT5E	4907	4505467	NP_002517.1	311	Yes	Yes	21	NSS	HGNPILL	SSIPEDP	Yes	High	[K].IEFDERGNVISSHGNPILLNSSIPEDPSIK.[A]	2xTMT6plex [N-Term; K30]; 2xDeamidated [N8(99.2); N15(99.2)]	0.126002	0.00315632	1	2	2	4505467	4505467 [292-321]	1	3737.96	N8(Deamidated): 99.21; N15(Deamidated): 99.21	8.4	18.8	5.1	5.2	32.5	9.7	10.7667	15.8	1.46749	0.96	Unique	1.16549	High	0.00084	0.02701
NT5E	4907	4505467	NP_002517.1	311	Yes	No	21	NSS	HGNPILL	SSIPEDP	Yes	High	[K].IEFDERGNVISSHGNPILLNSSIPEDPSIK.[A]	2xTMT6plex [N-Term; K30]; 1xDeamidated [N]	0.0147518	0	1	2	1	4505467	4505467 [292-321]	1	3736.98	N8(Deamidated): 50; N15(Deamidated): 50	19.1	13.2	10.1	9.8	26.5	16	14.1333	17.4333	1.23349	0.96	Unique	1.76046	High	0	0.001219
NT5E	4907	4505467	NP_002517.1	333	Yes	Yes	4	NYS	KWRIKLD	YSTQELG	Yes	High	[K].LDNYSTQELGK.[T]	2xTMT6plex [N-Term; K11]; 1xDeamidated [N3(100)]	2.08169e-07	0	1	2	8	4505467	4505467 [331-341]	0	1726.93	N3(Deamidated): 100	171.9	16	58.2	24.7	76.2	176.5	82.0333	92.4667	1.12718	0.96	Unique	4.00471	High	0	1.718e-10
NT5E	4907	4505467	NP_002517.1	333	Yes	Yes	4	NYS	KWRIKLD	YSTQELG	Yes	High	[K].LDNYSTQELGK.[T]	1xTMT6plex [K11]; 1xDeamidated [N3(100)]	0.00512194	0	1	2	4	4505467	4505467 [331-341]	0	1497.76	N3(Deamidated): 100	113.1	16.1	52	12.8	63.9	97.7	60.4	58.1333	0.962472	0.96	Unique	3.48831	High	0	0.0002717
NT5E	4907	4505467	NP_002517.1	311	Yes	Yes	15	NSS	HGNPILL	SSIPEDP	Yes	High	[R].GNVISSHGNPILLNSSIPEDPSIK.[A]	2xTMT6plex [N-Term; K24]; 3xDeamidated [N2(100); N9(100); N14(100)]	0.0515134	0.000598249	1	2	1	4505467	4505467 [298-321]	0	2949.58	N2(Deamidated): 100; N9(Deamidated): 100; N14(Deamidated): 100	8.7		4.3	4.5	6.9	8.2	6.5	6.53333	1.00513	0.96	Unique	1.4199	High	0.000164	0.007319
NT5E	4907	4505467	NP_002517.1	311	Yes	Yes	15	NSS	HGNPILL	SSIPEDP	Yes	High	[R].GNVISSHGNPILLNSSIPEDPSIK.[A]	2xTMT6plex [N-Term; K24]; 2xDeamidated [N2(100); N14(100)]	3.01134e-06	0	1	2	7	4505467	4505467 [298-321]	0	2948.6	N2(Deamidated): 100; N14(Deamidated): 99.6	14	5	6.2	8.3	8.3	10.6	8.4	9.06667	1.07937	0.96	Unique	2.05077	High	0	7.493e-09
NT5E	4907	4505467	NP_002517.1	311	Yes	Yes	15	NSS	HGNPILL	SSIPEDP	Yes	High	[R].GNVISSHGNPILLNSSIPEDPSIK.[A]	2xTMT6plex [N-Term; K24]; 1xDeamidated [N14(100)]	2.56005e-11	0	1	2	22	4505467	4505467 [298-321]	0	2947.61	N14(Deamidated): 100	467.8	23.2	139.7	25.3	143.3	343.4	210.233	170.667	0.811796	0.96	Unique	6.96474	High	0	1.101e-15
NT5E	4907	4505467	NP_002517.1	311	Yes	Yes	15	NSS	HGNPILL	SSIPEDP	Yes	High	[R].GNVISSHGNPILLNSSIPEDPSIK.[A]	1xTMT6plex [K24]; 1xDeamidated [N14(100)]	0.010661	0	1	2	3	4505467	4505467 [298-321]	0	2718.45	N14(Deamidated): 100	12.7	5.3	7.3	8.1	6.6	12.1	8.43333	8.93333	1.05929	0.96	Unique	2.1673	High	0	0.001433
NT5E	4907	4505467	NP_002517.1	333	Yes	Yes	6	NYS	KWRIKLD	YSTQELG	Yes	High	[R].IKLDNYSTQELGK.[T]	3xTMT6plex [N-Term; K2; K13]; 1xDeamidated [N5(100)]	9.71497e-12	0	1	2	22	4505467	4505467 [329-341]	1	2197.27	N5(Deamidated): 100	491.5	35.3	159.4	53.7	165.9	389.2	228.733	202.933	0.887205	0.96	Unique	5.85212	High	0	1.321e-16
NT5E	4907	4505467	NP_002517.1	333	Yes	Yes	6	NYS	KWRIKLD	YSTQELG	Yes	High	[R].IKLDNYSTQELGK.[T]	2xTMT6plex [K2; K13]; 1xDeamidated [N5(100)]	0.00686196	0	1	2	5	4505467	4505467 [329-341]	1	1968.11	N5(Deamidated): 100	45.2	13.4	28.7	8.8	32.4	40.6	29.1	27.2667	0.936999	0.96	Unique	3.24874	High	0	0.003129
NUDCD2	134492	21687129	NP_660309.1	144	Yes	Yes	16	NYT	SGAEISG	YTKGGPD	No	High	[K].ENPGFDFSGAEISGNYTK.[G]	2xTMT6plex [N-Term; K18]; 1xDeamidated [N15(100)]	1.22231e-07	0	1	1	4	21687129	21687129 [130-147]	0	2392.17	N15(Deamidated): 100	11.3	15	13.6	15.9	17.3	24.9	13.3	19.3667	1.45614	1.05	Unique	3.89934	High	0	8.12e-11
NUP210	23225	27477134	NP_079199.2	1441	Yes	Yes	5	NNT	QIGKGPT	NTCVVRT	Yes	High	[K].GPTNNTCVVR.[T]	1xCarbamidomethyl [C7]; 1xTMT6plex [N-Term]; 1xDeamidated [N4(100)]	0.0652616	0.000598249	1	4	2	27477134	27477134 [1438-1447]	0	1347.69	N4(Deamidated): 100	62.5	23.3	31.5	9.2	9	29.6	39.1	15.9333	0.407502	0.62	Unique	1.75775	High	0.000164	0.01031
NUP210	23225	27477134	NP_079199.2	926	Yes	Yes	10	NTS	GSGYFFL	TSTADVV	Yes	High	[R].EGSGYFFLNTSTADVVK.[V]	1xTMT6plex [K17]; 1xDeamidated [N9(100)]	0.152018	0.00357109	1	4	2	27477134	27477134 [918-934]	0	2065.03	N9(Deamidated): 100	11	7.4	10.7	8.3	3.3		9.7	5.8	0.597938	0.62	Unique	1.06533	High	0.003315	0.06696
NUP210	23225	27477134	NP_079199.2	405	Yes	Yes	19	NGS	EVLSSSQ	GSYHRIR	Yes	High	[R].IETVLPAEFFEVLSSSQNGSYHR.[I]	1xTMT6plex [N-Term]; 1xDeamidated [N18(100)]	0.00784742	0	1	4	1	27477134	27477134 [388-410]	0	2840.43	N18(Deamidated): 100	70.4	46.4	46.2	94	60.9	58.3	54.3333	71.0667	1.30798	0.62	Unique	2.70012	High	0	0.0004982
NUP210	23225	27477134	NP_079199.2	926	Yes	Yes	12	NTS	GSGYFFL	TSTADVV	Yes	High	[R].IREGSGYFFLNTSTADVVK.[V]	2xTMT6plex [N-Term; K19]; 1xDeamidated [N11(100)]	7.89599e-05	0	1	4	2	27477134	27477134 [916-934]	1	2563.38	N11(Deamidated): 100	34.5	17.3	21.3	14.1	10.4	19.8	24.3667	14.7667	0.606019	0.62	Unique	2.58479	High	0	7.507e-07
NUP210	23225	27477134	NP_079199.2	337	Yes	Yes	4	NST	QGASRLP	STIYVVE	Yes	High	[R].LPNSTIYVVEPGYLGFTVHPGDR.[W]	1xTMT6plex [N-Term]; 1xDeamidated [N3(100)]	0.0392882	0	1	4	2	27477134	27477134 [335-357]	0	2761.44	N3(Deamidated): 100	361	277.3	268.2	299.3	384.5	264.6	302.167	316.133	1.04622	0.62	Unique	2.73885	High	0	0.004928
OS9	10956	530399626	XP_005268638.1	177	Yes	Yes	9	NGS	YHSQTYG	GSKCDLN	No	High	[R].YHSQTYGNGSK.[C]	2xTMT6plex [N-Term; K11]; 1xDeamidated [N8(100)]	1.92734e-05	0	1	9	6	530399626	530399626 [170-180]	0	1700.86	N8(Deamidated): 100	25.7	16.7	17	17.1	20.8	19.3	19.8	19.0667	0.962963	#N/A	Unique	2.86269	High	0	1.026e-07
OS9	10956	530399626	XP_005268638.1	177	Yes	Yes	9	NGS	YHSQTYG	GSKCDLN	No	High	[R].YHSQTYGNGSK.[C]	1xTMT6plex [K11]; 1xDeamidated [N8(100)]	0.00133121	0	1	9	8	530399626	530399626 [170-180]	0	1471.7	N8(Deamidated): 100	38.2	29.4	24	21.9	36.6	32.9	30.5333	30.4667	0.997817	#N/A	Unique	2.42485	High	0	0.0001826
OSMR	9180	1021087270	NP_001310434.1	380	Yes	Yes	6	NVS	EGKMMQY	VSIKVNG	Yes	High	[K].MMQYNVSIK.[V]	1xTMT6plex [K9]; 2xOxidation [M1(100); M2(100)]; 1xDeamidated [N5(100)]	0.032102	0	1	3	3	1021087270	1021087270 [376-384]	0	1375.68	M1(Oxidation): 100; M2(Oxidation): 100; N5(Deamidated): 100	15.2	12.9	15.1	17.2	16	20.6	14.4	17.9333	1.24537	#N/A	Unique	1.93299	High	0	0.005385
OSMR	9180	1021087270	NP_001310434.1	580	Yes	Yes	6	NTT	QWKNVGP	TTSTVIS	Yes	High	[K].NVGPNTTSTVISTDAFRPGVR.[Y]	1xTMT6plex [N-Term]; 1xDeamidated [N5(100)]	8.24699e-07	0	1	5	2	1021087270	1021087270 [576-596]	0	2419.28	N5(Deamidated): 100	15.7	10.7	13.4	19.5	12.4	12.2	13.2667	14.7	1.10804	#N/A	Unique	3.46355	High	0	1.198e-09
OSTM1	28962	30025026	NP_054747.2	263	Yes	Yes	17	NIT	IDVEDAM	ITRKLWS	No	High	[K].AEPGTHLCIDVEDAMNITR.[K]	1xCarbamidomethyl [C8]; 1xTMT6plex [N-Term]; 1xOxidation [M15(100)]; 1xDeamidated [N16(100)]	0.207949	0.00881471	1	1	1	30025026	30025026 [248-266]	0	2388.14	M15(Oxidation): 100; N16(Deamidated): 100	14.5	6.8	5.7	8.8	5.1	10	9	7.96667	0.885185	1.14	Unique	0.943595	High	0.00277	0.05726
OSTM1	28962	30025026	NP_054747.2	135	Yes	Yes	5	NTS	NISRAAG	TSESQSC	No	High	[R].AAGNTSESQSCAR.[S]	1xCarbamidomethyl [C11]; 1xTMT6plex [N-Term]; 1xDeamidated [N4(100)]	1.11567e-06	0	1	1	3	30025026	30025026 [132-144]	0	1568.72	N4(Deamidated): 100	49.8	12	29.8		46.5	33.1	30.5333	39.8	1.30349	1.14	Unique	3.5754	High	0	1.837e-09
P2RX4	5025	378404897	NP_001243725.1	200	Yes	Yes	5	NFT	AFLKAAE	FTLLVKN	No	High	[K].AAENFTLLVK.[N]	2xTMT6plex [N-Term; K10]; 1xDeamidated [N4(100)]	3.56127e-05	0	1	5	2	378404897	378404897 [197-206]	0	1564.94	N4(Deamidated): 100	27.3	40.3	51.4	27.8	63.4	27	39.6667	39.4	0.993277	#N/A	Unique	3.50664	High	0	4.42e-07
P2RX4	5025	378404897	NP_001243725.1	200	Yes	Yes	5	NFT	AFLKAAE	FTLLVKN	No	High	[K].AAENFTLLVK.[N]	1xTMT6plex [K10]; 1xDeamidated [N4(100)]	0.11153	0.00274374	1	5	4	378404897	378404897 [197-206]	0	1335.77	N4(Deamidated): 100	6	9.2	7.3	8.5	9.8	5.5	7.5	7.93333	1.05778	#N/A	Unique	1.73771	High	0.001331	0.03248
P2RX4	5025	378404897	NP_001243725.1	91	Yes	Yes	7	NTS	VKGVAVT	TSKLGFR	No	High	[K].GVAVTNTSK.[L]	2xTMT6plex [N-Term; K9]; 1xDeamidated [N6(100)]	0.000192689	0	1	4	5	378404897	378404897 [86-94]	0	1335.79	N6(Deamidated): 100	42.5	66.8	66.8	61.5	87.6	42	58.7	63.7	1.08518	#N/A	Unique	3.26815	High	0	2.657e-06
P2RX4	5025	378404897	NP_001243725.1	91	Yes	Yes	9	NTS	VKGVAVT	TSKLGFR	No	High	[K].VKGVAVTNTSK.[L]	3xTMT6plex [N-Term; K2; K11]; 1xDeamidated [N8(100)]	0.143484	0.00357109	1	4	1	378404897	378404897 [84-94]	1	1792.11	N8(Deamidated): 100	10.2	9.3	15.7	23	20.1	12.3	11.7333	18.4667	1.57386	#N/A	Unique	1.36712	High	0.001331	0.03279
P2RX4	5025	378404897	NP_001243725.1	169	Yes	Yes	6	NGS	TGRCVAF	GSVKTCE	No	High	[R].CVAFNGSVK.[T]	1xCarbamidomethyl [C1]; 1xTMT6plex [K9]; 1xDeamidated [N5(100)]	0.115645	0.00315632	1	3	1	378404897	378404897 [165-173]	0	1211.63	N5(Deamidated): 100	6.4	6.1	8.4	5	6.4	4.6	6.96667	5.33333	0.76555	#N/A	Unique	1.51705	High	0.00084	0.02381
P2RX5	5026	28416933	NP_002552.2	77	Yes	Yes	7	NTS	VKGVAFT	TSDLGQR	No	High	[K].GVAFTNTSDLGQR.[I]	1xTMT6plex [N-Term]; 1xDeamidated [N6(100)]	0.0338074	0	1	4	1	28416933	28416933 [72-84]	0	1595.82	N6(Deamidated): 100	24.2	10.7	23.7	13.6	11	17.4	19.5333	14	0.716724	#N/A	Unique	1.2202	High	0	0.003971
P3H1	64175	342837704	NP_001230175.1	540	Yes	Yes	18	NVT	QSAHLYY	VTEKVRR	Yes	High	[K].LGQEGKVPLQSAHLYYNVTEK.[V]	3xTMT6plex [N-Term; K6; K21]; 1xDeamidated [N17(100)]	1.20485e-07	0	1	6	3	342837704	342837704 [524-544]	1	3062.71	N17(Deamidated): 100	14.5	7.4	7.9	12.5	12.6	11.2	9.93333	12.1	1.21812	#N/A	Unique	3.65719	High	0	5.469e-09
P3H1	64175	342837704	NP_001230175.1	540	Yes	Yes	18	NVT	QSAHLYY	VTEKVRR	Yes	High	[K].LGQEGKVPLQSAHLYYNVTEK.[V]	2xTMT6plex [K6; K21]; 1xDeamidated [N17(100)]	0.000373513	0	1	6	5	342837704	342837704 [524-544]	1	2833.55	N17(Deamidated): 100	14.8	9.6	8.9	20.3	14.2	11.3	11.1	15.2667	1.37538	#N/A	Unique	2.80642	High	0	4.338e-05
P3H1	64175	342837704	NP_001230175.1	540	Yes	Yes	12	NVT	QSAHLYY	VTEKVRR	Yes	High	[K].VPLQSAHLYYNVTEK.[V]	2xTMT6plex [N-Term; K15]; 1xDeamidated [N11(100)]	6.18539e-08	0	1	6	4	342837704	342837704 [530-544]	0	2221.23	N11(Deamidated): 100	11.2	11.3	7.1	8.1	11.1	14.6	9.86667	11.2667	1.14189	#N/A	Unique	3.63237	High	0	3.112e-11
P3H1	64175	342837704	NP_001230175.1	540	Yes	Yes	12	NVT	QSAHLYY	VTEKVRR	Yes	High	[K].VPLQSAHLYYNVTEK.[V]	1xTMT6plex [K15]; 1xDeamidated [N11(100)]	0.0102607	0	1	6	2	342837704	342837704 [530-544]	0	1992.06	N11(Deamidated): 100	8.7	8	8.4	7.4	10.5	9.2	8.36667	9.03333	1.07968	#N/A	Unique	1.68738	High	0	0.0007269
P3H3	10536	28466983	NP_055077.2	462	Yes	Yes	4	NGS	TQDSRQL	GSERAVL	No	High	[R].QLNGSER.[A]	1xTMT6plex [N-Term]; 1xDeamidated [N3(100)]	0.117226	0.00315632	1	1	2	28466983	28466983 [460-466]	0	1033.55	N3(Deamidated): 100	76.3	14.1	59.7	22.3	95.2	89.5	50.0333	69	1.37908	#N/A	Unique	2.75345	High	0.006266	0.1045
P3H4	10609	578830263	XP_006721703.1	459	Yes	Yes	9	NQT	EEAMLYH	QTAELRE	No	High	[R].EEAMLYHNQTAELR.[E]	1xTMT6plex [N-Term]; 1xOxidation [M4(100)]; 1xDeamidated [N8(100)]	4.44049e-05	0	1	2	7	578830263	578830263 [452-465]	0	1950.94	M4(Oxidation): 100; N8(Deamidated): 100	20.5	13.4	12.9	13.6	23.3	16.6	15.6	17.8333	1.14316	#N/A	Unique	3.6029	High	0	1.293e-06
P4HA1	5033	217272849	NP_001136067.1	113	Yes	Yes	10	NLT	MSDGFIS	LTIQRQY	Yes	High	[K].DMSDGFISNLTIQR.[Q]	1xTMT6plex [N-Term]; 1xOxidation [M2(100)]; 1xDeamidated [N9(100)]	8.90485e-07	0	1	3	12	217272849	217272849 [105-118]	0	1842.91	M2(Oxidation): 100; N9(Deamidated): 100	211.1	138.6	145.7	166.7	396.9	203.6	165.133	255.733	1.54865	0.88	Unique	4.50047	High	0	9.874e-08
P4HA1	5033	217272849	NP_001136067.1	259	Yes	Yes	4	NKS	MAKEKDV	KSASDDQ	Yes	High	[K].DVNKSASDDQSDQK.[T]	3xTMT6plex [N-Term; K4; K14]; 1xDeamidated [N3(100)]	2.19448e-07	0	1	3	6	217272849	217272849 [257-270]	1	2225.15	N3(Deamidated): 100	25.1	19.7	15.6	63.3	27.9	71.3	20.1333	54.1667	2.6904	0.88	Unique	3.12828	High	0	1.85e-10
P4HA1	5033	217272849	NP_001136067.1	259	Yes	Yes	4	NKS	MAKEKDV	KSASDDQ	Yes	High	[K].DVNKSASDDQSDQK.[T]	2xTMT6plex [K4; K14]; 1xDeamidated [N3(100)]	0.000249654	0	1	3	3	217272849	217272849 [257-270]	1	1995.99	N3(Deamidated): 100	6.5	5.1	6.2	8.4	8.7	11.8	5.93333	9.63333	1.6236	0.88	Unique	2.75515	High	0	3.824e-06
P4HA1	5033	217272849	NP_001136067.1	259	Yes	Yes	6	NKS	MAKEKDV	KSASDDQ	Yes	High	[K].EKDVNKSASDDQSDQK.[T]	4xTMT6plex [N-Term; K2; K6; K16]; 1xDeamidated [N5(100)]	2.48633e-08	0	1	3	10	217272849	217272849 [255-270]	2	2711.45	N5(Deamidated): 100	49.7	42.4	32.1	145.4	53.9	117.3	41.4	105.533	2.54911	0.88	Unique	4.199	High	0	8.579e-12
P4HA1	5033	217272849	NP_001136067.1	259	Yes	Yes	6	NKS	MAKEKDV	KSASDDQ	Yes	High	[K].EKDVNKSASDDQSDQK.[T]	3xTMT6plex [K2; K6; K16]; 1xDeamidated [N5(100)]	0.00323239	0	1	3	4	217272849	217272849 [255-270]	2	2482.29	N5(Deamidated): 100	8.8	6.6	7.7	12.1	11.3	11.5	7.7	11.6333	1.51082	0.88	Unique	2.16866	High	0	0.0001419
P4HA2	8974	4758868	NP_004190.1	264	Yes	Yes	5	NQT	EREKTLT	QTEAELA	Yes	High	[K].TLTNQTEAELATPEGIYERPVDYLPER.[D]	1xTMT6plex [N-Term]; 1xDeamidated [N4(100)]	7.90315e-11	0	1	4	6	4758868	4758868 [261-287]	0	3335.68	N4(Deamidated): 100	19.3	20.3	36.5	11.5	76	16.1	25.3667	34.5333	1.36137	1.28	Unique	4.9186	High	0	3.924e-10
P4HA2	8974	4758868	NP_004190.1	264	Yes	Yes	5	NQT	EREKTLT	QTEAELA	Yes	High	[K].TLTNQTEAELATPEGIYERPVDYLPERDVYESLCR.[G]	1xCarbamidomethyl [C34]; 1xTMT6plex [N-Term]; 1xDeamidated [N4(100)]	1.00379e-05	0	1	4	1	4758868	4758868 [261-295]	1	4358.13	N4(Deamidated): 100	6.8	11.5	20.2	11.7	27.7	7.6	12.8333	15.6667	1.22078	1.28	Unique	4.68719	High	0	4.098e-08
PBXIP1	57326	19923830	NP_065385.2	455	Yes	Yes	17	NAS	QDPGVSA	ASKAWHQ	No	High	[K].LQGLENWGQDPGVSANASK.[A]	2xTMT6plex [N-Term; K19]; 1xDeamidated [N16(100)]	8.08908e-06	0	1	3	3	19923830	19923830 [440-458]	0	2430.27	N16(Deamidated): 100	14.7	15.1	9.3	20	10.4	8.7	13.0333	13.0333	1	0.93	Unique	3.04535	High	0	3.019e-08
PCDH1	5097	530380562	XP_005268509.1	349	Yes	Yes	3	NDS	SVIQVKA	DSDQGAN	No	High	[K].ANDSDQGANAEIEYTFHQAPEVVR.[R]	1xTMT6plex [N-Term]; 1xDeamidated [N2(100)]	0.00100798	0	1	5	2	530380562	530380562 [348-371]	0	2891.36	N2(Deamidated): 100		7.7	2.6	4.2	4.4	3.2	5.15	3.93333	0.763754	#N/A	Unique	2.80848	High	0	2.752e-05
PCDH7	5099	767929787	XP_011512144.1	79	Yes	Yes	4	NLT	SEYLKID	LTGELST	Yes	High	[K].IDNLTGELSTSER.[R]	1xTMT6plex [N-Term]; 1xDeamidated [N3(100)]	0.0124825	0	1	22	3	767929787	767929787 [77-89]	0	1664.85	N3(Deamidated): 100	46.1	11.7	14.3	19	21.2	22.4	24.0333	20.8667	0.868239	#N/A	Unique	2.33732	High	0	0.0009573
PCDHGA10	56106	11128041	NP_061736.1	51	Yes	Yes	7	NIS	EKGSFVG	ISKDLGL	No	High	[K].GSFVGNISK.[D]	2xTMT6plex [N-Term; K9]; 1xDeamidated [N6(100)]	0.172721	0.00554469	1	7	3	11128041	11128041 [46-54]	0	1367.79	N6(Deamidated): 100	13.1	9	12.9	9.2	56.2	11.1	11.6667	25.5	2.18571	#N/A	Unique	1.50901	High	0.001833	0.04332
PCDHGB2	56103	11128035	NP_061746.1	545	Yes	Yes	11	NVS	GSPALSA	VSLRVLV	No	High	[R].DQGSPALSANVSLR.[V]	1xTMT6plex [N-Term]; 1xDeamidated [N10(100)]	0.000427196	0	1	10	4	11128035	11128035 [536-549]	0	1644.88	N10(Deamidated): 100	24.8	16.8	12.5	39.5	24	13.3	18.0333	25.6	1.41959	#N/A	Unique	2.58552	High	0	0.0001068
PCDHGC3	5098	14277675	NP_002579.2	424	Yes	Yes	15	NLS	RETVPEY	LSITARD	No	High	[K].TSADLDRETVPEYNLSITAR.[D]	1xTMT6plex [N-Term]; 1xDeamidated [N14(100)]	0.0109714	0	1	2	3	14277675	14277675 [411-430]	1	2481.27	N14(Deamidated): 100	7.7	7	9.3	11.6	19.4	8.6	8	13.2	1.65	#N/A	Unique	1.50578	High	0	0.0008019
PCDHGC3	5098	14277675	NP_002579.2	245	Yes	Yes	13	NQS	NDNAPVF	QSLYRAR	No	High	[K].VLDANDNAPVFNQSLYR.[A]	1xTMT6plex [N-Term]; 1xDeamidated [N12(100)]	6.97242e-07	0	1	2	4	14277675	14277675 [234-250]	0	2166.1	N12(Deamidated): 100	7.9	5.7	6.6	6	8.8	7.7	6.73333	7.5	1.11386	#N/A	Unique	3.42794	High	0	9.459e-10
PCDHGC3	5098	14277675	NP_002579.2	424	Yes	Yes	8	NLS	RETVPEY	LSITARD	No	High	[R].ETVPEYNLSITAR.[D]	1xTMT6plex [N-Term]; 1xDeamidated [N7(100)]	0.0106101	0	1	2	4	14277675	14277675 [418-430]	0	1722.91	N7(Deamidated): 100	12.1	12.2	11.1	14	29.1	10.3	11.8	17.8	1.50847	#N/A	Unique	2.09833	High	0	0.002137
PCYOX1	51449	166795301	NP_057381.3	353	Yes	Yes	5	NTS	TLVKGEL	TSIFSSR	Yes	High	[K].GELNTSIFSSRPIDK.[F]	2xTMT6plex [N-Term; K15]; 1xDeamidated [N4(100)]	0.0342877	0	1	1	1	166795301	166795301 [350-364]	0	2123.17	N4(Deamidated): 100	28.3	17.4	20.5	9.5	18.4	23.4	22.0667	17.1	0.774924	0.88	Unique	1.7812	High	0	0.004068
PCYOX1	51449	166795301	NP_057381.3	353	Yes	Yes	5	NTS	TLVKGEL	TSIFSSR	Yes	High	[K].GELNTSIFSSRPIDK.[F]	1xTMT6plex [K15]; 1xDeamidated [N4(100)]	0.0892198	0.00222925	1	1	1	166795301	166795301 [350-364]	0	1894.01	N4(Deamidated): 100	6.6	6.4	5.4	5.4	2.8	5.8	6.13333	4.66667	0.76087	0.88	Unique	1.46468	High	0.0005939	0.01629
PCYOX1	51449	166795301	NP_057381.3	196	Yes	Yes	16	NRT	DDFLGML	RTLLETL	Yes	High	[K].LLHALGGDDFLGMLNR.[T]	1xTMT6plex [N-Term]; 1xOxidation [M13(100)]; 1xDeamidated [N15(100)]	0.000114786	0	1	1	2	166795301	166795301 [182-197]	0	1988.05	M13(Oxidation): 100; N15(Deamidated): 100	9.1	9.3	7.5	3.7	6.8	9.2	8.63333	6.56667	0.760618	0.88	Unique	3.58091	High	0	1.277e-06
PIEZO1	9780	257196142	NP_001136336.2	2331	Yes	Yes	9	NST	HMLALAP	STARRQL	No	High	[K].HMLALAPNSTAR.[R]	1xTMT6plex [N-Term]; 1xOxidation [M2(100)]; 1xDeamidated [N8(100)]	2.52125e-05	0	1	1	5	257196142	257196142 [2324-2335]	0	1527.82	M2(Oxidation): 100; N8(Deamidated): 100	6	7.9	8.2	5.2	5.8	7.4	7.36667	6.13333	0.832579	#N/A	Unique	2.98113	High	0	9.324e-06
PIEZO1	9780	257196142	NP_001136336.2	2294	Yes	Yes	6	NGT	QMKRELY	GTADITL	Yes	High	[K].RELYNGTADITLR.[F]	1xTMT6plex [N-Term]; 1xDeamidated [N5(100)]	0.0759871	0.00173548	1	1	1	257196142	257196142 [2290-2302]	1	1751.95	N5(Deamidated): 100	5.6	3.9	4.1	4.5	2.7	4.8	4.53333	4	0.882353	#N/A	Unique	1.56595	High	0.0004721	0.01287
PIEZO1	9780	257196142	NP_001136336.2	2294	Yes	Yes	5	NGT	QMKRELY	GTADITL	Yes	High	[R].ELYNGTADITLR.[F]	1xTMT6plex [N-Term]; 1xDeamidated [N4(100)]	1.66128e-06	0	1	1	3	257196142	257196142 [2291-2302]	0	1595.85	N4(Deamidated): 100	37.2	102	109.8	47.1	51.8	35.1	83	44.6667	0.538153	#N/A	Unique	4.55153	High	0	3.227e-09
PIGS	94005	15088795	NP_149975.1	370	Yes	Yes	4	NAS	NVDSKTY	ASVLPVR	No	High	[K].TYNASVLPVR.[V]	1xTMT6plex [N-Term]; 1xDeamidated [N3(100)]	0.000221444	0	1	1	4	15088795	15088795 [368-377]	0	1349.76	N3(Deamidated): 100	21.2	25.1	19.4	12	22.5	28.8	21.9	21.1	0.96347	1.15	Unique	2.81975	High	0	3.234e-06
PIGS	94005	15088795	NP_149975.1	370	Yes	Yes	4	NAS	NVDSKTY	ASVLPVR	No	High	[K].TYNASVLPVRVEVDMVR.[V]	1xTMT6plex [N-Term]; 1xOxidation [M15(100)]; 1xDeamidated [N3(100)]	0.00964187	0	1	1	1	15088795	15088795 [368-384]	1	2194.17	N3(Deamidated): 100; M15(Oxidation): 100	5.8	5.6	5.6	6.8	9	8.8	5.66667	8.2	1.44706	1.15	Unique	1.37	High	0	0.0006649
PIGT	51604	23397653	NP_057021.2	327	Yes	Yes	16	NNS	LLDTAMI	NSRNLNI	No	High	[R].KTYAIYDLLDTAMINNSR.[N]	2xTMT6plex [K1; N-Term]; 1xOxidation [M13(100)]; 1xDeamidated [N15(99.7)]	1.38487e-08	0	1	6	2	23397653	23397653 [313-330]	1	2577.36	M13(Oxidation): 100; N15(Deamidated): 99.67	162.9	154.6	162.6	252.3	149.2	217.3	160.033	206.267	1.2889	1.02	Unique	5.76295	High	0	3.745e-12
PIGT	51604	23397653	NP_057021.2	327	Yes	Yes	16	NNS	LLDTAMI	NSRNLNI	No	High	[R].KTYAIYDLLDTAMINNSR.[N]	1xTMT6plex [K1]; 1xOxidation [M13(100)]; 1xDeamidated [N15(99.7)]	7.45434e-05	0	1	6	3	23397653	23397653 [313-330]	1	2348.2	M13(Oxidation): 100; N15(Deamidated): 99.67	9.6	7.5	8.1	8	8.4	9	8.4	8.46667	1.00794	1.02	Unique	2.83513	High	0	6.921e-07
PLA2G15	23659	767989678	XP_011521281.1	321	Yes	Yes	10	NYT	FVQTPTI	YTLRDYR	No	High	[K].VFVQTPTINYTLR.[D]	1xTMT6plex [N-Term]; 1xDeamidated [N9(100)]	0.00110944	0	1	3	7	767989678	767989678 [313-325]	0	1782	N9(Deamidated): 100		3.3	2.6				2.95	#DIV/0!	#DIV/0!	#N/A	Unique	2.52672	High	0	5.766e-05
PLA2R1	22925	767917241	XP_011509122.1	909	Yes	Yes	5	NQS	GRERTVN	QSQRCGF	No	High	[R].TVNNQSQR.[C]	1xTMT6plex [N-Term]; 1xDeamidated [N]	0.0213787	0	1	6	3	767917241	767917241 [906-913]	0	1176.62	N4(Deamidated): 99.85	15.1	6.3	29.4	5.7	59.2	7.3	16.9333	24.0667	1.42126	#N/A	Unique	2.51413	High	0	0.002069
PLAU	5328	4505863	NP_002649.1	322	Yes	Yes	3	NST	ITGFGKE	STDYLYP	No	High	[K].ENSTDYLYPEQLK.[M]	2xTMT6plex [N-Term; K13]; 1xDeamidated [N2(100)]	0.000281457	0	1	4	6	4505863	4505863 [321-333]	0	2059.06	N2(Deamidated): 100	12.2	7.2	17.4	7.7	9.2	39.1	12.2667	18.6667	1.52174	1.44	Unique	2.83144	High	0	4.542e-06
PLBD1	79887	110227598	NP_079105.4	71	Yes	No	10	NNS	GDAYGFY	NSVKTTG	Yes	High	[K].NGDAYGFYNNSVK.[T]	1xTMT6plex [K13]; 1xDeamidated [N]	0.000233441	0	1	1	4	110227598	110227598 [63-75]	0	1678.79	N9(Deamidated): 50; N10(Deamidated): 50	15.2	10.8	9.2	14.9	11.1	62.8	11.7333	29.6	2.52273	#N/A	Unique	2.9224	High	0	9.728e-06
PLBD1	79887	110227598	NP_079105.4	71	Yes	Yes	15	NNS	GDAYGFY	NSVKTTG	Yes	High	[K].NVMDKNGDAYGFYNNSVK.[T]	2xTMT6plex [K5; K18]; 1xOxidation [M3(100)]; 2xDeamidated [N14(99.5); N]	0.0236164	0	1	1	3	110227598	110227598 [58-75]	1	2512.21	N1(Deamidated): 50; M3(Oxidation): 100; N6(Deamidated): 50; N14(Deamidated): 99.5	8.4	5.5	5.5	13.1	4.6	25.9	6.46667	14.5333	2.24742	#N/A	Unique	1.53116	High	0	0.002383
PLBD2	196463	229093316	NP_775813.2	88	Yes	Yes	10	NLT	PDAVAWA	LTNAIRE	Yes	High	[R].HPDAVAWANLTNAIR.[E]	1xTMT6plex [N-Term]; 1xDeamidated [N9(100)]	2.16281e-06	0	1	2	5	229093316	229093316 [80-94]	0	1879	N9(Deamidated): 99.78	8.3	5.6	8.3	10.1	7.5	10	7.4	9.2	1.24324	1.05	Unique	4.17235	High	0	4.692e-09
PLBD2	196463	229093316	NP_775813.2	465	Yes	Yes	3	NQS	RAQIFRR	QSLVQDM	Yes	High	[R].RNQSLVQDMDSMVR.[L]	1xTMT6plex [N-Term]; 2xOxidation [M9(100); M12(100)]; 1xDeamidated [N2(100)]	1.55315e-05	0	1	4	8	229093316	229093316 [464-477]	1	1940.94	N2(Deamidated): 100; M9(Oxidation): 100; M12(Oxidation): 100	20.1	21.1	25.4	40	26.5	25.1	22.2	30.5333	1.37538	1.05	Unique	3.4772	High	0	9.205e-07
PLBD2	196463	229093316	NP_775813.2	515	Yes	Yes	8	NGS	RSDLNPA	GSYPFQA	Yes	High	[R].SDLNPANGSYPFQALR.[Q]	1xTMT6plex [N-Term]; 1xDeamidated [N7(99.6)]	0.000119276	0	1	4	7	229093316	229093316 [509-524]	0	1980	N7(Deamidated): 100	12.4	15.7	19.1	12.5	17.5	6	15.7333	12	0.762712	1.05	Unique	3.23187	High	0	1.347e-06
PLD3	23646	530416104	XP_005258761.1	387	Yes	Yes	3	NHT	SLAALRD	HTHSDIQ	No	High	[R].DNHTHSDIQVK.[L]	2xTMT6plex [N-Term; K11]; 1xDeamidated [N2(100)]	0.000530098	0	1	1	12	530416104	530416104 [386-396]	0	1752.93	N2(Deamidated): 100	53.1	26.8	51.5	29.2	54.7	28.8	43.8	37.5667	0.857686	0.96	Unique	3.26611	High	0	1.104e-05
PLD3	23646	530416104	XP_005258761.1	387	Yes	Yes	3	NHT	SLAALRD	HTHSDIQ	No	High	[R].DNHTHSDIQVK.[L]	1xTMT6plex [K11]; 1xDeamidated [N2(100)]	0.0378417	0	1	1	5	530416104	530416104 [386-396]	0	1523.77	N2(Deamidated): 100	22.8	14.7	13	6.2	30.4	11.1	16.8333	15.9	0.944554	0.96	Unique	1.94057	High	0	0.005168
PLOD1	5351	938148809	NP_001303249.1	585	Yes	Yes	6	NYT	KEKYIHQ	YTKALAG	No	High	[K].YIHQNYTK.[A]	2xTMT6plex [N-Term; K8]; 1xDeamidated [N5(100)]	0.000812319	0	1	2	12	938148809	938148809 [581-588]	0	1525.84	N5(Deamidated): 100	69.9	44.4	52.5	93.5	109.5	98.6	55.6	100.533	1.80815	1.35	Unique	2.90426	High	0	2.029e-05
PLOD1	5351	938148809	NP_001303249.1	585	Yes	Yes	6	NYT	KEKYIHQ	YTKALAG	No	High	[K].YIHQNYTK.[A]	1xTMT6plex [K8]; 1xDeamidated [N5(100)]	0.192517	0.00742786	1	2	2	938148809	938148809 [581-588]	0	1296.68	N5(Deamidated): 100	17.1	8.9	10.7	12.8	19.8	12.7	12.2333	15.1	1.23433	1.35	Unique	1.7879	High	0.00888	0.1482
PLOD1	5351	938148809	NP_001303249.1	244	Yes	Yes	5	NIT	PEKREQI	ITLDHRC	No	High	[R].EQINITLDHR.[C]	1xTMT6plex [N-Term]; 1xDeamidated [N4(100)]	0.0218918	0	1	2	13	938148809	938148809 [241-250]	0	1468.8	N4(Deamidated): 100	27.4	22.3	22	29.6	34.1	34.2	23.9	32.6333	1.36541	1.35	Unique	2.59095	High	0	0.002137
PLOD2	5352	33636742	NP_891988.1	365	Yes	Yes	8	NLS	KIVGPEE	LSQAEAR	Yes	High	[K].IVGPEENLSQAEAR.[N]	1xTMT6plex [N-Term]; 1xDeamidated [N7(100)]	0.0010936	0	1	3	6	33636742	33636742 [359-372]	0	1742.91	N7(Deamidated): 100	23.4	22.1	19.6	31.5	38.3	27.6	21.7	32.4667	1.49616	1.82	Unique	2.69472	High	0	3.087e-05
PLOD2	5352	33636742	NP_891988.1	63	Yes	Yes	4	NYT	MQSAKYF	YTVKVLG	Yes	High	[K].YFNYTVK.[V]	2xTMT6plex [N-Term; K7]; 1xDeamidated [N3(100)]	0.0023896	0	1	2	7	33636742	33636742 [61-67]	0	1393.78	N3(Deamidated): 100	33.7	20.8	21.5	68.2	121.2	38.8	25.3333	76.0667	3.00263	1.82	Unique	2.63602	High	0	9.267e-05
PLOD2	5352	33636742	NP_891988.1	63	Yes	Yes	4	NYT	MQSAKYF	YTVKVLG	Yes	High	[K].YFNYTVK.[V]	1xTMT6plex [K7]; 1xDeamidated [N3(100)]	0.151346	0.00357109	1	2	4	33636742	33636742 [61-67]	0	1164.61	N3(Deamidated): 100	12.8	14.1	11.7	14.7	37.3	16.1	12.8667	22.7	1.76425	1.82	Unique	1.9911	High	0.001331	0.03539
PLOD2	5352	33636742	NP_891988.1	209	Yes	Yes	5	NIT	PLKREAI	ITLDHKC	Yes	High	[R].EAINITLDHK.[C]	1xTMT6plex [K10]; 1xDeamidated [N4(100)]	0.00799926	0	1	3	6	33636742	33636742 [206-215]	0	1383.77	N4(Deamidated): 100	14.2	6.7	15.3	9	13.7	18.1	12.0667	13.6	1.12707	1.82	Unique	2.07527	High	0	0.005677
PLOD2	5352	33636742	NP_891988.1	209	Yes	Yes	5	NIT	PLKREAI	ITLDHKC	Yes	High	[R].EAINITLDHK.[C]	2xTMT6plex [N-Term; K10]; 1xDeamidated [N4(100)]	0.000151602	0	1	3	7	33636742	33636742 [206-215]	0	1612.93	N4(Deamidated): 100	12.7	8.1	9.9	27.3	46.5	15.5	10.2333	29.7667	2.90879	1.82	Unique	2.74947	High	0	8.588e-06
PLOD2	5352	33636742	NP_891988.1	746	Yes	Yes	13	NGT	HEGLPVK	GTRYIAV	No	High	[R].LTHLHEGLPVKNGTR.[Y]	2xTMT6plex [N-Term; K11]; 1xDeamidated [N12(100)]	1.26976e-05	0	1	3	10	33636742	33636742 [735-749]	1	2131.24	N12(Deamidated): 100	9.9	8.9	6	41	17.2	14.1	8.26667	24.1	2.91532	1.82	Unique	3.05488	High	0	5.689e-08
PLOD2	5352	33636742	NP_891988.1	746	Yes	Yes	13	NGT	HEGLPVK	GTRYIAV	No	High	[R].LTHLHEGLPVKNGTR.[Y]	1xTMT6plex [K11]; 1xDeamidated [N12(100)]	0.000429249	0	1	3	4	33636742	33636742 [735-749]	1	1902.08	N12(Deamidated): 100	10.7	11.7	10.6	17.9	20.3	13.3	11	17.1667	1.56061	1.82	Unique	2.2517	High	0	8.199e-06
PLOD2	5352	33636742	NP_891988.1	717	Yes	Yes	3	NCS	GCKFLRY	CSIESPR	No	High	[R].YNCSIESPR.[K]	1xCarbamidomethyl [C3]; 1xTMT6plex [N-Term]; 1xDeamidated [N2(100)]	0.00588602	0	1	3	2	33636742	33636742 [716-724]	0	1355.65	N2(Deamidated): 100	16.5	11.6	16.6	13	49.2	23.4	14.9	28.5333	1.91499	1.82	Unique	1.99159	High	0	0.0003328
PLOD3	8985	4505891	NP_001075.1	548	Yes	Yes	8	NYS	KEQYIHE	YSRALEG	Yes	High	[K].EQYIHENYSR.[A]	1xTMT6plex [N-Term]; 1xDeamidated [N7(100)]	1.01834e-05	0	1	1	14	4505891	4505891 [542-551]	0	1568.75	N7(Deamidated): 100	116.2	49.3	59.6	26.9	54.1	83.1	75.0333	54.7	0.729009	0.92	Unique	3.45267	High	0	9.647e-08
PLOD3	8985	4505891	NP_001075.1	63	Yes	Yes	7	NYT	LRSAEFF	YTVRTLG	Yes	High	[R].SAEFFNYTVR.[T]	1xTMT6plex [N-Term]; 1xDeamidated [N6(100)]	6.24215e-05	0	1	1	9	4505891	4505891 [58-67]	0	1463.74	N6(Deamidated): 100	242	80.7	100.2	102	86.8	159.6	140.967	116.133	0.823835	0.92	Unique	4.01394	High	0	1.38e-06
PLXNA1	5361	767926948	XP_011511210.1	95	Yes	Yes	5	NLT	RIYKLSG	LTLLRAH	No	High	[K].LSGNLTLLR.[A]	1xTMT6plex [N-Term]; 1xDeamidated [N4(100)]	0.194182	0.00742786	1	2	1	767926948	767926948 [92-100]	0	1216.75	N4(Deamidated): 100	12.1	8.3	7		10.3	15.3	9.13333	12.8	1.40146	#N/A	Unique	1.54954	High	0.002301	0.05176
PLXNA1	5361	767926948	XP_011511210.1	1061	Yes	Yes	3	NYT	TNPEVKY	YTEDPTI	No	High	[K].YNYTEDPTILR.[I]	1xTMT6plex [N-Term]; 1xDeamidated [N2(100)]	0.00326354	0	1	2	2	767926948	767926948 [1060-1070]	0	1614.82	N2(Deamidated): 100	24.9	19.5	19.3	14.4	14	27	21.2333	18.4667	0.869702	#N/A	Unique	2.4047	High	0	0.0001588
PLXNA1	5361	767926948	XP_011511210.1	1061	Yes	Yes	12	NYT	TNPEVKY	YTEDPTI	No	High	[R].AQLTNPEVKYNYTEDPTILR.[I]	2xTMT6plex [N-Term; K9]; 1xDeamidated [N]	0.00823254	0	1	2	2	767926948	767926948 [1051-1070]	1	2824.51	N11(Deamidated): 99.5	20	19.5	7.9	9.3	20.4	28.8	15.8	19.5	1.23418	#N/A	Unique	1.69736	High	0	0.0005319
PLXNA2	5362	530366268	XP_005273221.1	178	Yes	Yes	9	NKT	EHYLSSV	KTGTMYG	No	High	[K].EHYLSSVNK.[T]	2xTMT6plex [N-Term; K9]; 1xDeamidated [N8(100)]	0.10138	0.00222925	1	3	2	530366268	530366268 [171-179]	0	1535.85	N8(Deamidated): 100	5.2	9.9	6.3	5.9	5.2	8.4	7.13333	6.5	0.911215	#N/A	Unique	1.26609	High	0.001589	0.04003
PLXNA3	55558	533112479	NP_059984.3	59	Yes	Yes	5	NLT	RVFKLAP	LTELRAH	No	High	[K].LAPNLTELR.[A]	1xTMT6plex [N-Term]; 1xDeamidated [N4(100)]	0.124311	0.00315632	1	3	3	533112479	533112479 [56-64]	0	1256.74	N4(Deamidated): 100	11	9.5	13	7.1	11.8	9.1	11.1667	9.33333	0.835821	#N/A	Unique	1.46682	High	0.00084	0.02641
PLXNB1	5364	767923569	XP_011532136.1	1253	Yes	Yes	7	NIT	FKYTLDP	ITSAGPT	Yes	High	[K].YTLDPNITSAGPTK.[S]	2xTMT6plex [N-Term; K14]; 1xDeamidated [N6(100)]	0.00507305	0	1	2	2	767923569	767923569 [1248-1261]	0	1937.06	N6(Deamidated): 100	6	6.7	4.7	4.1	8.1	4	5.8	5.4	0.931034	#N/A	Unique	1.86651	High	0	0.0002696
PLXNB1	5364	767923569	XP_011532136.1	1253	Yes	Yes	7	NIT	FKYTLDP	ITSAGPT	Yes	High	[K].YTLDPNITSAGPTK.[S]	1xTMT6plex [K14]; 1xDeamidated [N6(100)]	0.0149644	0	1	2	3	767923569	767923569 [1248-1261]	0	1707.9	N6(Deamidated): 100	8.4	12.1	9.5	15.2	16	11.8	10	14.3333	1.43333	#N/A	Unique	2.25084	High	0	0.004046
PLXNB2	23654	768031366	XP_011528984.1	796	Yes	Yes	7	NET	PKLSHDA	ETLPLHL	No	High	[K].LSHDANETLPLHLYVK.[S]	2xTMT6plex [N-Term; K16]; 1xDeamidated [N6(100)]	5.67456e-09	0	1	2	7	768031366	768031366 [791-806]	0	2309.29	N6(Deamidated): 100	14.6	14.4	13.9	17	15.4	12	14.3	14.8	1.03497	1.04	Unique	4.29115	High	0	1.066e-12
PLXNB2	23654	768031366	XP_011528984.1	591	Yes	Yes	13	NMS	VTSAQPQ	MSRRAQG	No	High	[K].SCVAVTSAQPQNMSR.[R]	1xCarbamidomethyl [C2]; 1xTMT6plex [N-Term]; 1xOxidation [M13(100)]; 1xDeamidated [N12(100)]	0.000232324	0	1	2	3	768031366	768031366 [580-594]	0	1881.9	N12(Deamidated): 100; M13(Oxidation): 100	11	6.4	8.9	10.8	11	11.9	8.76667	11.2333	1.28137	1.04	Unique	2.46156	High	0	3.457e-06
PLXNB2	23654	768031366	XP_011528984.1	1131	Yes	Yes	17	NLT	PEEPEAY	LTVLIEM	No	High	[K].VVFLSPAVPEEPEAYNLTVLIEMDGHR.[A]	1xTMT6plex [N-Term]; 1xOxidation [M23(100)]; 1xDeamidated [N16(100)]	0.0123638	0	1	2	1	768031366	768031366 [1116-1142]	0	3271.68	N16(Deamidated): 100; M23(Oxidation): 100	158.4	128.3	136.4	135.5	132.2	143.3	141.033	137	0.971402	1.04	Unique	3.75222	High	0	0.0009499
PLXNB2	23654	768031366	XP_011528984.1	190	Yes	Yes	5	NIS	CALRALS	ISLRLFY	No	High	[R].ALSNISLR.[L]	1xTMT6plex [N-Term]; 1xDeamidated [N4(100)]	0.0215825	0	1	2	1	768031366	768031366 [187-194]	0	1103.66	N4(Deamidated): 100	76.1	131.9	104.8	124	101.1	45.8	104.267	90.3	0.866049	1.04	Unique	2.98982	High	0	0.002092
PLXNB2	23654	768031366	XP_011528984.1	1112	Yes	Yes	20	NDT	GTDYVFH	DTKVVFL	No	High	[R].EAESLQPMTVVGTDYVFHNDTK.[V]	2xTMT6plex [N-Term; K22]; 1xOxidation [M8(100)]; 1xDeamidated [N19(100)]	7.75296e-11	0	1	2	12	768031366	768031366 [1094-1115]	0	2956.47	M8(Oxidation): 100; N19(Deamidated): 100	57.8	85.6	71.1	42.7	62.2	36.3	71.5	47.0667	0.658275	1.04	Unique	5.53011	High	0	9.716e-14
PLXNB2	23654	768031366	XP_011528984.1	1112	Yes	Yes	20	NDT	GTDYVFH	DTKVVFL	No	High	[R].EAESLQPMTVVGTDYVFHNDTK.[V]	1xTMT6plex [K22]; 1xOxidation [M8(100)]; 1xDeamidated [N19(100)]	6.24319e-06	0	1	2	7	768031366	768031366 [1094-1115]	0	2727.3	M8(Oxidation): 100; N19(Deamidated): 100	11	22.8	17.5	13.8	18	8.3	17.1	13.3667	0.781676	1.04	Unique	4.10176	High	0	4.818e-08
PLXNB2	23654	768031366	XP_011528984.1	1065	Yes	Yes	4	NVT	ASGGRSI	VTGQGFS	No	High	[R].SINVTGQGFSLIQR.[F]	1xTMT6plex [N-Term]; 1xDeamidated [N3(100)]	0.000532646	0	1	2	7	768031366	768031366 [1063-1076]	0	1749.97	N3(Deamidated): 100	16.9	23	15.4	26.3	16	14	18.4333	18.7667	1.01808	1.04	Unique	2.39101	High	0	1.114e-05
PLXNB2	23654	768031366	XP_011528984.1	1162	Yes	Yes	17	NFT	VPDPTFE	FTGGVKK	No	High	[R].TEAGAFEYVPDPTFENFTGGVKK.[Q]	2xTMT6plex [K22; K23]; 1xDeamidated [N16(100)]	7.31395e-06	0	1	2	4	768031366	768031366 [1147-1169]	1	2963.51	N16(Deamidated): 100	17.8	26.3	23.5	27.8	21.2	11.5	22.5333	20.1667	0.89497	1.04	Unique	2.75934	High	0	2.611e-08
POFUT2	23275	768020450	XP_011527806.1	324	Yes	Yes	4	NST	EFRSRHL	STDDADR	No	High	[R].HLNSTDDADR.[I]	1xTMT6plex [N-Term]; 1xDeamidated [N3(100)]	0.0134735	0	1	11	4	768020450	768020450 [322-331]	0	1373.65	N3(Deamidated): 100	5.5	5.2	8.3	5.6	6.5	9.9	6.33333	7.33333	1.15789	#N/A	Unique	1.6764	High	0	0.00502
POFUT2	23275	768020450	XP_011527806.1	324	Yes	Yes	4	NST	EFRSRHL	STDDADR	No	High	[R].HLNSTDDADRIPFQEDWMK.[M]	2xTMT6plex [N-Term; K19]; 1xOxidation [M18(100)]; 1xDeamidated [N3(100)]	0.000125136	0	1	11	3	768020450	768020450 [322-340]	1	2793.36	N3(Deamidated): 100; M18(Oxidation): 100	5.5	5.4	9	6.8	8.4	9	6.63333	8.06667	1.21608	#N/A	Unique	2.48813	High	0	1.438e-06
POMT2	29954	767980352	XP_011534977.1	583	Yes	Yes	6	NDT	GLRFSGV	DTDFRVY	Yes	High	[R].FSGVNDTDFR.[V]	1xTMT6plex [N-Term]; 1xDeamidated [N5(100)]	0.0349385	0	1	6	3	767980352	767980352 [579-588]	0	1387.67	N5(Deamidated): 100	30.3	13.5	15.2	15.2	21.8	13.5	19.6667	16.8333	0.855932	#N/A	Unique	1.77594	High	0.004828	0.08498
PON2	5445	66529294	NP_000296.2	254	Yes	Yes	6	NLT	LEKHTNM	LTQLKVL	Yes	High	[K].HTNMNLTQLK.[V]	2xTMT6plex [N-Term; K10]; 1xOxidation [M4(100)]; 2xDeamidated [N3(100); N5(100)]	0.0083517	0	1	5	5	66529294	66529294 [250-259]	0	1675.91	N3(Deamidated): 100; M4(Oxidation): 100; N5(Deamidated): 100	10.2	7.3	8.5	10.3	7.2	13.6	8.66667	10.3667	1.19615	0.95	Unique	2.44563	High	0	0.0009265
PON2	5445	66529294	NP_000296.2	254	Yes	Yes	6	NLT	LEKHTNM	LTQLKVL	Yes	High	[K].HTNMNLTQLK.[V]	2xTMT6plex [N-Term; K10]; 1xOxidation [M4(100)]; 1xDeamidated [N5(100)]	0.000232324	0	1	5	11	66529294	66529294 [250-259]	0	1674.92	M4(Oxidation): 100; N5(Deamidated): 100	54.3	37.4	46.1	29.7	33.9	87.3	45.9333	50.3	1.09507	0.95	Unique	3.41202	High	0	3.994e-05
PON2	5445	66529294	NP_000296.2	254	Yes	Yes	6	NLT	LEKHTNM	LTQLKVL	Yes	High	[K].HTNMNLTQLK.[V]	1xTMT6plex [K10]; 1xOxidation [M4(100)]; 1xDeamidated [N5(100)]	0.0047894	0	1	5	17	66529294	66529294 [250-259]	0	1445.76	M4(Oxidation): 100; N5(Deamidated): 100	115.5	71	102.5	43.7	95.1	145.4	96.3333	94.7333	0.983391	0.95	Unique	3.36677	High	0	0.000865
PON2	5445	66529294	NP_000296.2	323	Yes	No	19	NGS	VTTVYAN	GSVLQGS	Yes	High	[R].IQNILSEKPTVTTVYANNGSVLQGSSVASVYDGK.[L]	2xTMT6plex [K8; K34]; 1xDeamidated [N]	2.21498e-05	0	1	5	6	66529294	66529294 [306-339]	0	3999.13	N17(Deamidated): 50; N18(Deamidated): 50	10.5	11	14.1	7.5	7.3	14.4	11.8667	9.73333	0.820225	0.95	Unique	2.35816	High	0	1.252e-07
PON2	5445	66529294	NP_000296.2	323	Yes	Yes	19	NGS	VTTVYAN	GSVLQGS	Yes	High	[R].IQNILSEKPTVTTVYANNGSVLQGSSVASVYDGK.[L]	2xTMT6plex [K8; K34]; 2xDeamidated [N17(99.3); N18(99.3)]	0.000606284	0	1	5	3	66529294	66529294 [306-339]	0	4000.12	N17(Deamidated): 100; N18(Deamidated): 100	14.4	11.1	13.1	16.6	11.5	22.9	12.8667	17	1.32124	0.95	Unique	3.20925	High	0	1.342e-05
PPIB	5479	4758950	NP_000933.1	148	Yes	Yes	4	NGS	ANAGKDT	GSQFFIT	No	High	[K].DTNGSQFFITTVK.[T]	2xTMT6plex [N-Term; K13]; 1xDeamidated [N3(100)]	0.0216852	0	1	1	3	4758950	4758950 [146-158]	0	1917.04	N3(Deamidated): 100	14.1	12.2	9.7	13.5	14.8	56.2	12	28.1667	2.34722	1.32	Unique	2.0234	High	0	0.002105
PPT1	5538	4506031	NP_000301.1	197	Yes	Yes	7	NHS	IKEDVYR	HSIFLAD	Yes	High	[K].EDVYRNHSIFLADINQER.[G]	1xTMT6plex [N-Term]; 1xDeamidated [N6(100)]	0.00308105	0	1	3	2	4506031	4506031 [192-209]	1	2449.23	N6(Deamidated): 100	4.1	3	3.3		3.3	3.3	3.46667	3.3	0.951923	0.99	Unique	1.92926	High	0	0.002077
PPT1	5538	4506031	NP_000301.1	212	Yes	Yes	4	NES	INQERGI	ESYKKNL	Yes	High	[R].GINESYK.[K]	2xTMT6plex [N-Term; K7]; 1xDeamidated [N3(100)]	0.0712434	0.00117085	1	3	3	4506031	4506031 [210-216]	0	1269.71	N3(Deamidated): 100	75.7	42.2	53.7	32.9	59.9	58.5	57.2	50.4333	0.881702	0.99	Unique	2.13348	High	0.0003202	0.01171
PPT1	5538	4506031	NP_000301.1	212	Yes	Yes	4	NES	INQERGI	ESYKKNL	Yes	High	[R].GINESYKK.[N]	3xTMT6plex [N-Term; K7; K8]; 1xDeamidated [N3(100)]	0.117757	0.00315632	1	3	2	4506031	4506031 [210-217]	1	1626.97	N3(Deamidated): 100	49.4	25.1	37.7	38.1	35.5	30.8	37.4	34.8	0.930481	0.99	Unique	1.843	High	0.00084	0.02449
PPT1	5538	4506031	NP_000301.1	197	Yes	Yes	19	NHS	IKEDVYR	HSIFLAD	Yes	High	[R].LVQAEYWHDPIKEDVYRNHSIFLADINQER.[G]	2xTMT6plex [N-Term; K12]; 1xDeamidated [N18(100)]	0.000495674	0	1	3	3	4506031	4506031 [180-209]	2	4158.14	N18(Deamidated): 100	6	3.5	2.8	6.5	2.7	5.3	4.1	4.83333	1.17886	0.99	Unique	3.1066	High	0	1.007e-05
PRCP	5547	117306169	NP_955450.2	436	Yes	Yes	2	NIS	TTMYGGK	ISSHTNI	No	High	[K].NISSHTNIVFSNGELDPWSGGGVTK.[D]	2xTMT6plex [N-Term; K25]; 2xDeamidated [N1(99.5); N12(99.5)]	0.150676	0.00357109	1	3	1	117306169	117306169 [436-460]	0	3076.56	N1(Deamidated): 99.46; N12(Deamidated): 99.46	5.1	7.1	4.9	9.3	7.5	5	5.7	7.26667	1.27485	#N/A	Unique	1.27228	High	0.001331	0.03529
PRCP	5547	117306169	NP_955450.2	169	Yes	Yes	2	NYS	TGRCVAF	GSVKTCE	No	High	[K].NYSVLYFQQK.[AV]	1xTMT6plex [K10]; 1xDeamidated [N1(100)]	0.0884072	0.00222925	1	2	2	117306169	117306169 [47-56]	0	1519.8	N1(Deamidated): 100	13.4	10.4	20.6	12.8	26.9	17.7	14.8	19.1333	1.29279	#N/A	Unique	2.16423	High	0.00084	0.02841
PRNP	5621	34335270	NP_898902.1	197	Yes	Yes	4	NFT	TTTTKGE	FTETDVK	Yes	High	[K].GENFTETDVK.[M]	2xTMT6plex [N-Term; K10]; 1xDeamidated [N3(100)]	0.000139731	0	1	1	9	34335270	34335270 [195-204]	0	1598.83	N3(Deamidated): 100	29.1	66.1	43.8	36.6	32	123.6	46.3333	64.0667	1.38273	1.35	Unique	3.06145	High	0	1.691e-06
PRNP	5621	34335270	NP_898902.1	197	Yes	Yes	4	NFT	TTTTKGE	FTETDVK	Yes	High	[K].GENFTETDVK.[M]	1xTMT6plex [K10]; 1xDeamidated [N3(100)]	0.0411724	0	1	1	4	34335270	34335270 [195-204]	0	1369.67	N3(Deamidated): 100	13.2	19.9	10.9	15.2	9.5	22.3	14.6667	15.6667	1.06818	1.35	Unique	2.16032	High	0.000164	0.007169
PRNP	5621	34335270	NP_898902.1	197	Yes	Yes	13	NFT	TTTTKGE	FTETDVK	Yes	High	[K].QHTVTTTTKGENFTETDVK.[M]	2xTMT6plex [K9; K19]; 1xDeamidated [N12(100)]	0.00385988	0	1	1	5	34335270	34335270 [186-204]	1	2596.35	N12(Deamidated): 100	14.9	36.8	21.3	37.7	15	40	24.3333	30.9	1.26986	1.35	Unique	2.74428	High	0	0.0001832
PRNP	5621	34335270	NP_898902.1	197	Yes	Yes	13	NFT	TTTTKGE	FTETDVK	Yes	High	[K].QHTVTTTTKGENFTETDVK.[M]	3xTMT6plex [N-Term; K9; K19]; 1xDeamidated [N12(100)]	6.46109e-11	0	1	1	12	34335270	34335270 [186-204]	1	2825.51	N12(Deamidated): 100	41.9	97.6	65.1	180.4	38.1	129.2	68.2	115.9	1.69941	1.35	Unique	6.0238	High	0	1.922e-15
PROM2	150696	260764009	NP_001159450.1	707	Yes	Yes	20	NVT	ETSDVLA	VTYLKGE	No	High	[R].ALESSAPNLQLETSDVLANVTYLK.[G]	2xTMT6plex [N-Term; K24]; 1xDeamidated [N19(100)]	2.438e-05	0	1	2	1	260764009	260764009 [689-712]	0	3035.66	N19(Deamidated): 100	106.9	139.6	93.6	109.2	93.3	108.5	113.367	103.667	0.914437	0.52	Unique	3.89227	High	0	1.434e-07
PRSS23	11098	645065995	NP_009104.2	288	Yes	Yes	8	NDS	KDGGRGA	DSTSAMP	No	High	[K].DGGRGANDSTSAMPEQMK.[F]	1xTMT6plex [K18]; 2xOxidation [M13(100); M17(100)]; 1xDeamidated [N7(100)]	0.00165184	0	1	3	4	645065995	645065995 [282-299]	1	2113.93	N7(Deamidated): 100; M13(Oxidation): 100; M17(Oxidation): 100	4.9	3.6	3.1	11.4	3.9	4.2	3.86667	6.5	1.68103	#N/A	Unique	1.94773	High	0	5.505e-05
PRSS23	11098	645065995	NP_009104.2	174	Yes	Yes	12	NGS	SYETLYA	GSRTETQ	No	High	[K].QYLSYETLYANGSR.[T]	1xTMT6plex [N-Term]; 1xDeamidated [N11(100)]	0.0443718	0	1	3	1	645065995	645065995 [164-177]	0	1894.94	N11(Deamidated): 100	10.1	8.3	13.2	24.6	6.8	28.6	10.5333	20	1.89873	#N/A	Unique	1.37145	High	0	0.005897
PRSS23	11098	645065995	NP_009104.2	288	Yes	Yes	4	NDS	KDGGRGA	DSTSAMP	No	High	[R].GANDSTSAMPEQMK.[F]	2xTMT6plex [N-Term; K14]; 2xOxidation [M9(100); M13(100)]; 1xDeamidated [N3(100)]	0.000242572	0	1	3	7	645065995	645065995 [286-299]	0	1957.92	N3(Deamidated): 100; M9(Oxidation): 100; M13(Oxidation): 100	32.6	8.2	26.5	38	10.8	24.3	22.4333	24.3667	1.08618	#N/A	Unique	3.49434	High	0	3.238e-05
PSAP	5660	110224476	NP_001035930.1	80	Yes	Yes	3	NAT	AGDMLKD	ATEEEIL	Yes	High	[K].DNATEEEILVYLEK.[T]	2xTMT6plex [N-Term; K14]; 1xDeamidated [N2(100)]	1.23427e-08	0	1	3	4	110224476	110224476 [79-92]	0	2125.13	N2(Deamidated): 100	206.1	309.5	238.3	135.8	263.4	167.6	251.3	188.933	0.751824	0.76	Unique	4.94216	High	0	3.18e-12
PSAP	5660	110224476	NP_001035930.1	80	Yes	Yes	14	NAT	AGDMLKD	ATEEEIL	Yes	High	[K].DVVTAAGDMLKDNATEEEILVYLEK.[T]	3xTMT6plex [N-Term; K11; K25]; 1xOxidation [M9(100)]; 1xDeamidated [N13(100)]	9.52895e-11	0	1	3	5	110224476	110224476 [68-92]	1	3470.84	M9(Oxidation): 100; N13(Deamidated): 100	563.2	1101	1397.4	329.5	977	325.4	1020.53	543.967	0.533022	0.76	Unique	7.48033	High	0	6.141e-12
PSAP	5660	110224476	NP_001035930.1	335	Yes	Yes	6	NKT	VTKLIDN	KTEKEIL	No	High	[K].LIDNNKTEK.[E]	3xTMT6plex [N-Term; K6; K9]; 2xDeamidated [N4(100); N5(100)]	0.001357	0	1	3	12	110224476	110224476 [331-339]	1	1764.04	N4(Deamidated): 100; N5(Deamidated): 100	228.2	374.5	480.5	50.4	428.1	174.4	361.067	217.633	0.602751	0.76	Unique	2.76078	High	0	5.394e-05
PSAP	5660	110224476	NP_001035930.1	335	Yes	Yes	6	NKT	VTKLIDN	KTEKEIL	No	High	[K].LIDNNKTEK.[E]	3xTMT6plex [N-Term; K6; K9]; 1xDeamidated [N]	0.000789278	0	1	3	46	110224476	110224476 [331-339]	1	1763.05	N5(Deamidated): 100	746.6	1285.7	1618.9	137.2	1204.5	563	1217.07	634.9	0.521664	0.76	Unique	3.1273	High	0	6.434e-05
PSAP	5660	110224476	NP_001035930.1	335	Yes	Yes	6	NKT	VTKLIDN	KTEKEIL	No	High	[K].LIDNNKTEK.[E]	2xTMT6plex [K6; K9]; 2xDeamidated [N4(100); N5(100)]	0.0111299	0	1	3	5	110224476	110224476 [331-339]	1	1534.87	N4(Deamidated): 100; N5(Deamidated): 100	10.3	17.1	22.6	5	21.8	11.3	16.6667	12.7	0.762	0.76	Unique	1.58581	High	0.000164	0.01029
PSAP	5660	110224476	NP_001035930.1	335	Yes	Yes	6	NKT	VTKLIDN	KTEKEIL	No	High	[K].LIDNNKTEK.[E]	2xTMT6plex [K6; K9]; 1xDeamidated [N]	0.00819319	0	1	3	12	110224476	110224476 [331-339]	1	1533.89	N5(Deamidated): 99.79	23.2	43.5	65.6	9.7	62.9	16.4	44.1	29.6667	0.672714	0.76	Unique	1.9587	High	0	0.000942
PSAP	5660	110224476	NP_001035930.1	335	Yes	No	6	NKT	VTKLIDN	KTEKEIL	No	High	[K].LIDNNKTEKEILDAFDK.[M]	4xTMT6plex [N-Term; K6; K9; K17]; 1xDeamidated [N]	7.78569e-07	0	1	3	10	110224476	110224476 [331-347]	2	2923.68	N4(Deamidated): 50; N5(Deamidated): 50	341.1	670.6	711.8	236.7	477.5	239	574.5	317.733	0.553061	0.76	Unique	4.04233	High	0	1.134e-09
PSAP	5660	110224476	NP_001035930.1	335	Yes	No	6	NKT	VTKLIDN	KTEKEIL	No	High	[K].LIDNNKTEKEILDAFDK.[M]	3xTMT6plex [K6; K9; K17]; 1xDeamidated [N]	0.00354071	0	1	3	8	110224476	110224476 [331-347]	2	2694.52	N4(Deamidated): 50; N5(Deamidated): 50	6.1	12.5	16.1	2.7	13.4	4.3	11.5667	6.8	0.587896	0.76	Unique	2.00317	High	0	0.0001618
PSAP	5660	110224476	NP_001035930.1	429	Yes	Yes	2	NST	LDRNLEK	STKQEIL	No	High	[K].NSTKQEILAALEK.[G]	2xTMT6plex [K4; K13]; 1xDeamidated [N1(100)]	0.000239106	0	1	3	8	110224476	110224476 [429-441]	1	1904.11	N1(Deamidated): 100	27.7	41.6	47.2	16.7	39.4	19.1	38.8333	25.0667	0.645494	0.76	Unique	2.96216	High	0	3.608e-06
PSAP	5660	110224476	NP_001035930.1	429	Yes	Yes	6	NST	LDRNLEK	STKQEIL	No	High	[R].NLEKNSTK.[Q]	2xTMT6plex [K4; K8]; 1xDeamidated [N5(100)]	0.178853	0.00603891	1	3	7	110224476	110224476 [425-432]	1	1392.81	N5(Deamidated): 100	136.2	149.7	260.1	67.2	173.4	109.1	182	116.567	0.640476	0.76	Unique	2.51761	High	0.001958	0.04549
PSAP	5660	110224476	NP_001035930.1	429	Yes	Yes	6	NST	LDRNLEK	STKQEIL	No	High	[R].NLEKNSTK.[Q]	3xTMT6plex [N-Term; K4; K8]; 1xDeamidated [N5(100)]	0.00344029	0	1	3	6	110224476	110224476 [425-432]	1	1621.97	N5(Deamidated): 100	169.3	167.7	268.1	36.1	167.2	161.8	201.7	121.7	0.603371	0.76	Unique	2.208	High	0	0.0001555
PSAP	5660	110224476	NP_001035930.1	429	Yes	Yes	6	NST	LDRNLEK	STKQEIL	No	High	[R].NLEKNSTKQEILAALEK.[G]	4xTMT6plex [N-Term; K4; K8; K17]; 1xDeamidated [N]	1.06373e-08	0	1	3	8	110224476	110224476 [425-441]	2	2846.7	N5(Deamidated): 100	45.7	74.9	106.6	54.6	56.9	27	75.7333	46.1667	0.609595	0.76	Unique	3.55691	High	0	2.586e-12
PSAP	5660	110224476	NP_001035930.1	429	Yes	Yes	6	NST	LDRNLEK	STKQEIL	No	High	[R].NLEKNSTKQEILAALEK.[G]	3xTMT6plex [K4; K8; K17]; 1xDeamidated [N5(99.8)]	2.12202e-07	0	1	3	18	110224476	110224476 [425-441]	2	2617.54	N5(Deamidated): 100	82	145.5	233.1	77	127.9	42.1	153.533	82.3333	0.536257	0.76	Unique	3.95683	High	0	1.764e-10
PSAP	5660	110224476	NP_001035930.1	215	Yes	Yes	3	NST	IQTAVRT	STFVQAL	Yes	High	[R].TNSTFVQALVEHVK.[E]	2xTMT6plex [N-Term; K14]; 1xDeamidated [N2(100)]	0.000130031	0	1	3	1	110224476	110224476 [214-227]	0	2032.15	N2(Deamidated): 100	8.7	9.1	16		14.4	9.8	11.2667	12.1	1.07396	0.76	Unique	3.55412	High	0	1.527e-06
PSAP	5660	110224476	NP_001035930.1	215	Yes	Yes	3	NST	IQTAVRT	STFVQAL	Yes	High	[R].TNSTFVQALVEHVK.[E]	1xTMT6plex [K14]; 1xDeamidated [N2(100)]	0.000639127	0	1	3	7	110224476	110224476 [214-227]	0	1802.98	N2(Deamidated): 100	13.8	14.2	24.4	12.8	18.4	17.4	17.4667	16.2	0.927481	0.76	Unique	3.25082	High	0	1.442e-05
PSAP	5660	110224476	NP_001035930.1	215	Yes	Yes	3	NST	IQTAVRT	STFVQAL	Yes	High	[R].TNSTFVQALVEHVKEECDR.[L]	1xCarbamidomethyl [C17]; 1xTMT6plex [K14]; 1xDeamidated [N2(100)]	0.00611617	0	1	3	5	110224476	110224476 [214-232]	1	2492.23	N2(Deamidated): 100	11.9	9.5	14.6	8.8	12.1	9.6	12	10.1667	0.847222	0.76	Unique	2.30312	High	0	0.002298
PTGFRN	5738	1034560423	XP_016857363.1	306	Yes	Yes	8	NIT	KELDLTC	ITTDRAD	No	High	[K].ELDLTCNITTDR.[A]	1xCarbamidomethyl [C6]; 1xTMT6plex [N-Term]; 1xDeamidated [N7(100)]	0.147367	0.00357109	1	2	2	1034560423	1034560423 [300-311]	0	1680.83	N7(Deamidated): 100	12.5	60.4	12.9	16	24.8	10.7	28.6	17.1667	0.600233	#N/A	Unique	1.89539	High	0.002895	0.05767
PTGFRN	5738	1034560423	XP_016857363.1	292	Yes	Yes	2	NVS	LRAAVPK	VSVAEGK	No	High	[K].NVSVAEGK.[E]	1xTMT6plex [K8]; 1xDeamidated [N1(100)]	0.148024	0.00357109	1	2	4	1034560423	1034560423 [292-299]	0	1033.57	N1(Deamidated): 100	8.8	34.6	7.1	7.3	12.7	11	16.8333	10.3333	0.613861	#N/A	Unique	2.09809	High	0.001331	0.03613
PTGFRN	5738	1034560423	XP_016857363.1	292	Yes	Yes	7	NVS	LRAAVPK	VSVAEGK	No	High	[R].AAVPKNVSVAEGK.[E]	3xTMT6plex [N-Term; K5; K13]; 1xDeamidated [N6(100)]	0.010661	0	1	2	3	1034560423	1034560423 [287-299]	1	1958.19	N6(Deamidated): 100	10.2	62.9	9	8.1	14.6	13.8	27.3667	12.1667	0.44458	#N/A	Unique	1.94165	High	0	0.0007703
PTGFRN	5738	1034560423	XP_016857363.1	606	Yes	Yes	19	NET	VGDLSSP	ETKYIIS	No	High	[R].YSVLIMAEKPVGDLSSPNETK.[Y]	3xTMT6plex [N-Term; K9; K21]; 1xOxidation [M6(100)]; 1xDeamidated [N18(100)]	6.00815e-06	0	1	2	6	1034560423	1034560423 [589-609]	0	2982.63	M6(Oxidation): 100; N18(Deamidated): 100	7.8	52.9	7.7	7.2	15.6	6.7	22.8	9.83333	0.431287	#N/A	Unique	3.41262	High	0	1.978e-08
PTGFRN	5738	1034560423	XP_016857363.1	606	Yes	Yes	19	NET	VGDLSSP	ETKYIIS	No	High	[R].YSVLIMAEKPVGDLSSPNETK.[Y]	2xTMT6plex [K9; K21]; 1xOxidation [M6(100)]; 1xDeamidated [N18(100)]	0.0387395	0	1	2	3	1034560423	1034560423 [589-609]	0	2753.47	M6(Oxidation): 100; N18(Deamidated): 100	5.4	29.9	6.8	9.7	10.5	6.6	14.0333	8.93333	0.63658	#N/A	Unique	1.43148	High	0	0.004842
PTGS2	5743	4506265	NP_000954.1	580	Yes	Yes	6	NAS	LIKTVTI	ASSSRSG	No	High	[K].TVTINASSSR.[S]	1xTMT6plex [N-Term]; 1xDeamidated [N5(100)]	0.000106817	0	1	1	3	4506265	4506265 [576-585]	0	1265.69	N5(Deamidated): 100	15	178.9	11.5	18.9	409.5	16.3	68.4667	148.233	2.16504	1.71	Unique	3.64152	High	0	1.154e-06
PTK7	5754	393715082	NP_001257327.1	291	Yes	Yes	7	NGS	RRATVFA	GSLLLTQ	No	High	[R].ATVFANGSLLLTQVRPR.[N]	1xTMT6plex [N-Term]; 1xDeamidated [N6(100)]	0.0239543	0	1	7	2	393715082	393715082 [286-302]	0	2073.2	N6(Deamidated): 100	5.2	9.8	6.9	8.3	7.1		7.3	7.7	1.05479	1.1	Unique	1.74725	High	0	0.00243
PTK7	5754	393715082	NP_001257327.1	183	Yes	Yes	12	NHT	PLSDGQS	HTVSSKE	No	High	[R].DGTPLSDGQSNHTVSSK.[E]	2xTMT6plex [N-Term; K17]; 1xDeamidated [N11(100)]	6.52528e-13	0	1	7	13	393715082	393715082 [173-189]	0	2189.11	N11(Deamidated): 100	25.8	70.7	41.5	65.9	57	27.8	46	50.2333	1.09203	1.1	Unique	5.76671	High	0	2.912e-18
PTK7	5754	393715082	NP_001257327.1	183	Yes	Yes	12	NHT	PLSDGQS	HTVSSKE	No	High	[R].DGTPLSDGQSNHTVSSK.[E]	1xTMT6plex [K17]; 1xDeamidated [N11(100)]	1.92762e-06	0	1	7	13	393715082	393715082 [173-189]	0	1959.95	N11(Deamidated): 100	18.5	122	49.4	95.5	73.8	20.8	63.3	63.3667	1.00105	1.1	Unique	5.10337	High	0	3.977e-09
PTK7	5754	393715082	NP_001257327.1	183	Yes	Yes	12	NHT	PLSDGQS	HTVSSKE	No	High	[R].DGTPLSDGQSNHTVSSKER.[N]	1xTMT6plex [K17]; 1xDeamidated [N11(100)]	0.00047931	0	1	7	1	393715082	393715082 [173-191]	1	2245.09	N11(Deamidated): 100	10.4	8.9	4.4	15.7	8.3	4.2	7.9	9.4	1.18987	1.1	Unique	2.27442	High	0	9.586e-06
PTK7	5754	393715082	NP_001257327.1	471	Yes	Yes	17	NGT	SRFEVFK	GTLRINS	No	High	[R].NQMLISEDSRFEVFKNGTLR.[I]	1xTMT6plex [K15]; 1xOxidation [M3(100)]; 1xDeamidated [N16(98.7)]	0.148683	0.00357109	1	5	3	393715082	393715082 [456-475]	2	2630.34	M3(Oxidation): 100; N16(Deamidated): 98.8	6.7	8.2	5.1	12.6	7.1	8.1	6.66667	9.26667	1.39	1.1	Unique	1.60024	High	0.001331	0.03444
PTK7	5754	393715082	NP_001257327.1	413	Yes	Yes	6	NIT	GQRRQDV	ITVATVP	No	High	[R].RQDVNITVATVPSWLK.[K]	2xTMT6plex [N-Term; K16]; 1xDeamidated [N5(100)]	3.37824e-05	0	1	5	5	393715082	393715082 [409-424]	1	2286.32	N5(Deamidated): 100	7.3	15.1	11.6	21.4	10.8	9.4	11.3333	13.8667	1.22353	1.1	Unique	2.85528	High	0	2.273e-07
PTK7	5754	393715082	NP_001257327.1	124	Yes	Yes	4	NAS	GEEARSA	ASFNIKW	No	High	[R].SANASFNIK.[W]	1xTMT6plex [K9]; 1xDeamidated [N3(100)]	0.0188957	0	1	7	3	393715082	393715082 [122-130]	0	1181.64	N3(Deamidated): 100	11.6	42.3	19.1	35.7	23	14.4	24.3333	24.3667	1.00137	1.1	Unique	2.86005	High	0	0.001734
PTK7	5754	393715082	NP_001257327.1	124	Yes	Yes	4	NAS	GEEARSA	ASFNIKW	No	High	[R].SANASFNIK.[W]	2xTMT6plex [N-Term; K9]; 1xDeamidated [N3(100)]	0.000561501	0	1	7	4	393715082	393715082 [122-130]	0	1410.8	N3(Deamidated): 100	8.2	46.2	18.3	64.7	26	9.7	24.2333	33.4667	1.38102	1.1	Unique	2.63576	High	0	1.205e-05
PTPRF	5792	767905346	XP_011540173.1	970	Yes	Yes	11	NIT	NSQQELQ	ITTDTRF	No	High	[R].DINSQQELQNITTDTR.[F]	1xTMT6plex [N-Term]; 2xDeamidated [N3(100); N10(100)]	3.37875e-06	0	1	15	7	767905346	767905346 [961-976]	0	2107.04	N3(Deamidated): 100; N10(Deamidated): 100	16.1	15.7	19.4	17.2	12.8	19.2	17.0667	16.4	0.960938	0.98	Unique	3.68006	High	0	1.123e-08
PTPRF	5792	767905346	XP_011540173.1	970	Yes	Yes	11	NIT	NSQQELQ	ITTDTRF	No	High	[R].DINSQQELQNITTDTR.[F]	1xTMT6plex [N-Term]; 1xDeamidated [N10(100)]	4.0361e-08	0	1	15	8	767905346	767905346 [961-976]	0	2106.05	N10(Deamidated): 100	17.9	11.8	20.1	18.6	13.8	13.7	16.6	15.3667	0.925703	0.98	Unique	5.53984	High	0	4.009e-11
PTPRG	5793	1034634856	XP_016862450.1	484	Yes	Yes	13	NTT	QTMLFQA	TTRIFQG	No	High	[R].SDFSQTMLFQANTTR.[I]	1xTMT6plex [N-Term]; 1xOxidation [M7(100)]; 1xDeamidated [N12(100)]	0.000131285	0	1	6	4	1034634856	1034634856 [473-487]	0	1992.95	M7(Oxidation): 100; N12(Deamidated): 100	5	6.8	4.6	6.7	5.8	7.6	5.46667	6.7	1.22561	#N/A	Unique	2.73226	High	0	1.548e-06
PTPRJ	5795	1034574780	XP_016873573.1	532	Yes	Yes	4	NGT	EIVPKGP	GTEGASR	No	High	[K].GPNGTEGASR.[T]	1xTMT6plex [N-Term]; 1xDeamidated [N3(100)]	0.00847258	0	1	5	4	1034574780	1034574780 [530-539]	0	1175.59	N3(Deamidated): 100	15.2	10.1	23.1	40.1	63.6	31.2	16.1333	44.9667	2.78719	#N/A	Unique	2.80312	High	0	0.000554
PTPRJ	5795	1034574780	XP_016873573.1	589	Yes	Yes	5	NHT	IESKHGS	HTSTYDK	No	High	[K].HGSNHTSTYDK.[A]	2xTMT6plex [N-Term; K11]; 1xDeamidated [N4(100)]	0.0132187	0	1	4	4	1034574780	1034574780 [586-596]	0	1705.85	N4(Deamidated): 100	7.2	6	9.7	16.7	17.5	6.3	7.63333	13.5	1.76856	#N/A	Unique	1.98327	High	0	0.001042
PTPRJ	5795	1034574780	XP_016873573.1	589	Yes	Yes	5	NHT	IESKHGS	HTSTYDK	No	High	[K].HGSNHTSTYDK.[A]	1xTMT6plex [K11]; 1xDeamidated [N4(100)]	3.82695e-05	0	1	4	9	1034574780	1034574780 [586-596]	0	1476.69	N4(Deamidated): 100	26.4	17.3	28.5	62.4	120	28.3	24.0667	70.2333	2.91828	#N/A	Unique	3.57192	High	0	1.365e-06
PTPRJ	5795	1034574780	XP_016873573.1	420	Yes	Yes	14	NVS	ETDSSNL	VSEPRAV	No	High	[K].IHVAGETDSSNLNVSEPR.[A]	1xTMT6plex [N-Term]; 1xDeamidated [N]	2.34794e-10	0	1	5	6	1034574780	1034574780 [408-425]	0	2155.08	N13(Deamidated): 100	10	9.5	7.5	8.9	9.4	7.1	9	8.46667	0.940741	#N/A	Unique	5.06965	High	0	1.188e-14
PTPRJ	5795	1034574780	XP_016873573.1	149	Yes	Yes	3	NDT	VILTWKS	DTAASEY	No	High	[K].SNDTAASEYK.[Y]	2xTMT6plex [N-Term; K10]; 1xDeamidated [N2(100)]	4.54827e-05	0	1	4	7	1034574780	1034574780 [148-157]	0	1544.78	N2(Deamidated): 100	45.5	33.6	60.5	104.9	176.7	72.9	46.5333	118.167	2.5394	#N/A	Unique	3.88431	High	0	5.483e-06
PTPRJ	5795	1034574780	XP_016873573.1	149	Yes	Yes	3	NDT	VILTWKS	DTAASEY	No	High	[K].SNDTAASEYK.[Y]	1xTMT6plex [K10]; 1xDeamidated [N2(100)]	0.0281319	0	1	4	4	1034574780	1034574780 [148-157]	0	1315.62	N2(Deamidated): 100	8.1	7.1	10.6	11	23.7	10.1	8.6	14.9333	1.73643	#N/A	Unique	2.18302	High	0.0005939	0.01775
PTPRJ	5795	1034574780	XP_016873573.1	398	Yes	Yes	5	NES	LIWKVSD	ESSSNYT	No	High	[K].VSDNESSSNYTYK.[I]	2xTMT6plex [N-Term; K13]; 2xDeamidated [N4(100); N9(100)]	0.00447845	0	1	5	5	1034574780	1034574780 [395-407]	0	1953.93	N4(Deamidated): 100; N9(Deamidated): 100	12.8	10.8	12.4	25	29.6	15.9	12	23.5	1.95833	#N/A	Unique	2.57992	High	0	0.0002252
PTPRJ	5795	1034574780	XP_016873573.1	398	Yes	Yes	5	NES	LIWKVSD	ESSSNYT	No	High	[K].VSDNESSSNYTYK.[I]	2xTMT6plex [N-Term; K13]; 1xDeamidated [N9(100)]	0.0237285	0	1	5	4	1034574780	1034574780 [395-407]	0	1952.95	N9(Deamidated): 100	6	3.8	5.7	9	11.2	7.4	5.16667	9.2	1.78065	#N/A	Unique	1.82578	High	0	0.002402
PTPRJ	5795	1034574780	XP_016873573.1	398	Yes	Yes	5	NES	LIWKVSD	ESSSNYT	No	High	[K].VSDNESSSNYTYK.[I]	1xTMT6plex [K13]; 2xDeamidated [N4(100); N9(100)]	0.00344029	0	1	5	3	1034574780	1034574780 [395-407]	0	1724.77	N4(Deamidated): 100; N9(Deamidated): 100	8.1	7.1	10.6	14.5	35.8	10	8.6	20.1	2.33721	#N/A	Unique	2.3666	High	0	0.0003909
PTPRJ	5795	1034574780	XP_016873573.1	398	Yes	Yes	5	NES	LIWKVSD	ESSSNYT	No	High	[K].VSDNESSSNYTYK.[I]	1xTMT6plex [K13]; 1xDeamidated [N9(100)]	0.0112907	0	1	5	3	1034574780	1034574780 [395-407]	0	1723.79	N9(Deamidated): 100	8	6.8	7.2	10.4	23.1	7.6	7.33333	13.7	1.86818	#N/A	Unique	1.83871	High	0	0.0008318
PTPRJ	5795	1034574780	XP_016873573.1	111	Yes	Yes	8	NGT	RTPEQGS	GTDGASQ	No	High	[R].TPEQGSNGTDGASQK.[T]	2xTMT6plex [N-Term; K15]; 1xDeamidated [N7(100)]	1.82007e-07	0	1	5	9	1034574780	1034574780 [105-119]	0	1935.97	N7(Deamidated): 100	34.2	9.6	45	30.9	127.3	59	29.6	72.4	2.44595	#N/A	Unique	5.69551	High	0	3.993e-09
PTPRJ	5795	1034574780	XP_016873573.1	111	Yes	Yes	8	NGT	RTPEQGS	GTDGASQ	No	High	[R].TPEQGSNGTDGASQK.[T]	1xTMT6plex [K15]; 1xDeamidated [N7(100)]	2.96787e-05	0	1	5	5	1034574780	1034574780 [105-119]	0	1706.8	N7(Deamidated): 100	9		19.5	5.8	55.1	11	14.25	23.9667	1.68187	#N/A	Unique	3.59623	High	0	3.826e-07
PTPRJ	5795	1034574780	XP_016873573.1	349	Yes	Yes	3	NAT	LEPGTRY	ATVYSQA	No	High	[R].YNATVYSQAANGTEGQPQAIEFR.[T]	1xTMT6plex [N-Term]; 2xDeamidated [N2(100); N11(100)]	7.63996e-09	0	1	5	4	1034574780	1034574780 [348-370]	0	2746.32	N2(Deamidated): 100; N11(Deamidated): 100	5.6	6.4	5.7	8.2	6.4	7.1	5.9	7.23333	1.22599	#N/A	Unique	4.3319	High	0	1.618e-12
PTPRK	5796	634743231	NP_001278910.1	462	Yes	Yes	15	NVS	NHLPPYT	VSLKMIL	No	High	[K].APQHVVNHLPPYTNVSLK.[M]	2xTMT6plex [N-Term; K18]; 1xDeamidated [N14(100)]	5.7828e-07	0	1	16	9	634743231	634743231 [449-466]	0	2473.4	N14(Deamidated): 100	15.9	20.5	16.6	20.7	16.5	16.1	17.6667	17.7667	1.00566	#N/A	Unique	3.24554	High	0	7.276e-10
PTPRK	5796	634743231	NP_001278910.1	436	Yes	Yes	4	NES	YHYFRGH	ESKADCL	No	High	[R].GHNESK.[A]	2xTMT6plex [N-Term; K6]; 1xDeamidated [N3(100)]	0.162433	0.00357109	1	16	2	634743231	634743231 [434-439]	0	1130.62	N3(Deamidated): 100	9.3	8.2	6.6	2.5	6.9	10.9	8.03333	6.76667	0.842324	#N/A	Unique	1.70474	High	0.001331	0.03933
PTPRK	5796	634743231	NP_001278910.1	416	Yes	Yes	13	NIT	DWESLGY	ITRCHTF	No	High	[R].RIAVDWESLGYNITR.[C]	1xTMT6plex [N-Term]; 1xDeamidated [N12(100)]	0.0852277	0.00222925	1	16	2	634743231	634743231 [405-419]	1	2023.08	N12(Deamidated): 100	5.5	6.1	4.1	5	4.5	5.4	5.23333	4.96667	0.949045	#N/A	Unique	1.59437	High	0.0005939	0.01518
PTPRS	5802	104487006	NP_002841.3	940	Yes	Yes	12	NAS	QILEAAG	ASAGTVL	Yes	High	[R].GHPQILEAAGNASAGTVLLR.[W]	1xTMT6plex [N-Term]; 1xDeamidated [N11(100)]	3.17496e-07	0	1	12	3	104487006	104487006 [930-949]	0	2205.22	N11(Deamidated): 100	55	5.5	5.7	7.1	5	7	22.0667	6.36667	0.28852	#N/A	Unique	4.34804	High	0	3.123e-10
PTPRS	5802	104487006	NP_002841.3	733	Yes	Yes	9	NAT	KVEAEAL	ATAIRVL	Yes	High	[R].KVEAEALNATAIR.[V]	2xTMT6plex [K1; N-Term]; 1xDeamidated [N8(100)]	0.000800716	0	1	11	3	104487006	104487006 [726-738]	1	1845.08	N8(Deamidated): 100	32.2	25.2	31.1	34.4	25.9	26.8	29.5	29.0333	0.984181	#N/A	Unique	2.26764	High	0	1.983e-05
PTPRU	10076	1034554516	XP_016855481.1	75	Yes	Yes	15	NTS	HGSYLMV	TSQHAPG	No	High	[R].APADLPHGSYLMVNTSQHAPGQR.[A]	1xTMT6plex [N-Term]; 1xOxidation [M12(100)]; 1xDeamidated [N14(100)]	0.000269566	0	1	8	4	1034554516	1034554516 [62-84]	0	2693.33	M12(Oxidation): 100; N14(Deamidated): 100	4.8	7.1	6.7	5.5	4.6	6.6	6.2	5.56667	0.897849	#N/A	Unique	2.23535	High	0	4.255e-06
PVR	5817	609878250	NP_006496.4	249	Yes	Yes	3	NSS	LTYERKD	TTVTRLL	No	High	[R].ENSSSQDPQTEGTR.[-]	1xTMT6plex [N-Term]; 1xDeamidated [N2(100)]	0.000405243	0	1	3	3	609878250	609878250 [404-417]	0	1765.8	N2(Deamidated): 100	4.3	9.2	7.2	33.4		22.5	6.9	27.95	4.05072	1.19	Unique	2.50522	High	0	7.569e-06
QPCT	25797	6912618	NP_036545.1	49	Yes	Yes	10	NSS	YHQPAIL	SSALRQI	Yes	High	[K].NYHQPAILNSSALR.[Q]	1xTMT6plex [N-Term]; 1xDeamidated [N9(100)]	0.024297	0	1	1	2	6912618	6912618 [41-54]	0	1813.98	N9(Deamidated): 100	7.3	5.3	3.4	4.5	3.2	5.7	5.33333	4.46667	0.8375	#N/A	Unique	1.7991	High	0	0.002481
QSOX1	5768	13325075	NP_002817.2	130	Yes	Yes	6	NGS	FFKAFTK	GSGAVFP	No	High	[K].AFTKNGSGAVFPVAGADVQTLR.[E]	2xTMT6plex [N-Term; K4]; 1xDeamidated [N5(100)]	0.0415596	0	1	2	2	13325075	13325075 [126-147]	1	2665.47	N5(Deamidated): 100	10.9	7.3	6.3	26.1	6.8	9.1	8.16667	14	1.71429	#N/A	Unique	1.65825	High	0.002989	0.06105
QSOX2	169714	145580631	NP_859052.3	218	Yes	Yes	13	NSS	VAIVFES	SSYLGRE	No	High	[R].GSHYVAIVFESNSSYLGR.[E]	1xTMT6plex [N-Term]; 1xDeamidated [N12(100)]	3.31404e-05	0	1	1	6	145580631	145580631 [207-224]	0	2216.12	N12(Deamidated): 100	32.5	28	27.8	37.9	25.3	36.3	29.4333	33.1667	1.12684	1.28	Unique	3.97613	High	0	2.204e-07
RCN1	5954	4506455	NP_002892.1	53	Yes	Yes	17	NQS	GERPPED	QSFQYDH	Yes	High	[R].VVRPDSELGERPPEDNQSFQYDHEAFLGK.[E]	2xTMT6plex [N-Term; K29]; 1xDeamidated [N16(100)]	0.000339349	0	1	1	10	4506455	4506455 [38-66]	0	3818.9	N16(Deamidated): 100	10.9	9.4	12.7	10.6	13.6	13.8	11	12.6667	1.15152	1.19	Unique	3.37869	High	0	5.905e-06
RCN1	5954	4506455	NP_002892.1	53	Yes	Yes	17	NQS	GERPPED	QSFQYDH	Yes	High	[R].VVRPDSELGERPPEDNQSFQYDHEAFLGK.[E]	1xTMT6plex [K29]; 1xDeamidated [N16(100)]	0.00321693	0	1	1	4	4506455	4506455 [38-66]	0	3589.74	N16(Deamidated): 100	8	8.7	11.6	7.8	13	7.4	9.43333	9.4	0.996466	1.19	Unique	2.10072	High	0	0.0001413
RCN1	5954	4506455	NP_002892.1	53	Yes	Yes	17	NQS	GERPPED	QSFQYDH	Yes	High	[R].VVRPDSELGERPPEDNQSFQYDHEAFLGKEDSK.[T]	3xTMT6plex [N-Term; K29; K33]; 1xDeamidated [N16(100)]	1.76022e-08	0	1	1	9	4506455	4506455 [38-70]	1	4507.26	N16(Deamidated): 100	13.1	22.5	33.4	41.5	25.2	29.9	23	32.2	1.4	1.19	Unique	5.87085	High	0	8.984e-10
RCN1	5954	4506455	NP_002892.1	53	Yes	Yes	17	NQS	GERPPED	QSFQYDH	Yes	High	[R].VVRPDSELGERPPEDNQSFQYDHEAFLGKEDSK.[T]	2xTMT6plex [K29; K33]; 1xDeamidated [N16(100)]	1.17595e-05	0	1	1	4	4506455	4506455 [38-70]	1	4278.1	N16(Deamidated): 100	8.6	15.3	19.5	24.1	22.5	12.5	14.4667	19.7	1.36175	1.19	Unique	2.9193	High	0	5.105e-08
RNF13	11342	1034631014	XP_016861144.1	88	Yes	Yes	3	NSS	VPPPVKD	SSGTFIV	No	High	[K].DNSSGTFIVLIR.[R]	1xTMT6plex [N-Term]; 1xDeamidated [N2(100)]	0.011787	0	1	1	2	1034631014	1034631014 [87-98]	0	1551.86	N2(Deamidated): 100	32.5	18.9	19.3	28.4	27.6	22.4	23.5667	26.1333	1.10891	#N/A	Unique	2.18688	High	0	0.0008851
RNF149	284996	530368597	XP_005263977.1	131	Yes	Yes	3	NAS	VLVAARR	ASAVVLY	No	High	[R].RNASAVVLYNEER.[Y]	1xTMT6plex [N-Term]; 1xDeamidated [N2(100)]	0.000510145	0	1	3	3	530368597	530368597 [130-142]	1	1750.93	N2(Deamidated): 100	4.5	3.9	3.9	5.9	4.1	6	4.1	5.33333	1.30081	#N/A	Unique	3.34932	High	0	1.05e-05
RPN1	6184	4506675	NP_002941.1	299	Yes	Yes	19	NVS	YYRDEIG	VSTSHLL	Yes	High	[K].TILPAAAQDVYYRDEIGNVSTSHLLILDDSVEMEIRPR.[F]	1xTMT6plex [N-Term]; 1xOxidation [M33(100)]; 1xDeamidated [N18(100)]	2.12295e-10	0	1	1	5	4506675	4506675 [282-319]	1	4546.33	N18(Deamidated): 100; M33(Oxidation): 100	197.4	168.5	178.1	215.4	178.7	270.1	181.333	221.4	1.22096	1.12	Unique	10.6311	High	0	1.027e-14
RPN1	6184	4506675	NP_002941.1	299	Yes	Yes	6	NVS	YYRDEIG	VSTSHLL	Yes	High	[R].DEIGNVSTSHLLILDDSVEMEIRPR.[F]	1xTMT6plex [N-Term]; 1xOxidation [M20(100)]; 1xDeamidated [N5(100)]	8.25301e-12	0	1	1	6	4506675	4506675 [295-319]	0	3084.57	N5(Deamidated): 100; M20(Oxidation): 100	11.8	8.8	11.1	10.4	11.9	20.3	10.5667	14.2	1.34385	1.12	Unique	5.16486	High	0	1.051e-16
RTN4R	65078	13194201	NP_075380.1	372	Yes	Yes	13	NGS	PGDSPPG	GSGPRHI	No	High	[K].GRVPPGDSPPGNGSGPR.[H]	1xTMT6plex [N-Term]; 1xDeamidated [N12(100)]	0.0202913	0	1	1	3	13194201	13194201 [361-377]	1	1833.94	N12(Deamidated): 100	6.6	9.2	8.9	3.9	5.3	7.7	8.23333	5.63333	0.684211	#N/A	Unique	1.37322	High	0	0.001915
RYK	6259	54607020	NP_001005861.1	209	Yes	Yes	8	NTS	KTSALDK	TSRTIYD	No	High	[K].TSALDKNTSR.[T]	1xTMT6plex [K6]; 1xDeamidated [N7(100)]	0.0413655	0	1	2	4	54607020	54607020 [203-212]	1	1322.71	N7(Deamidated): 100	7.1	8.4	6.3	7.7	5.2	8.9	7.26667	7.26667	1	#N/A	Unique	1.91504	High	0.0003202	0.01221
S1PR2	9294	134244587	NP_004221.3	19	Yes	Yes	7	NYT	NKVQEHY	YTKETLE	Yes	High	[K].VQEHYNYTK.[E]	2xTMT6plex [N-Term; K9]; 1xDeamidated [N6(100)]	0.0246444	0	1	1	2	134244587	134244587 [14-22]	0	1640.87	N6(Deamidated): 100	9.5	8.1	6.5	5.3	8.5	10	8.03333	7.93333	0.987552	#N/A	Unique	1.40822	High	0.0005939	0.01436
SCAP	22937	767922692	XP_011531803.1	590	Yes	Yes	5	NQT	DAPKLPE	QTSPGES	Yes	High	[K].LPENQTSPGESPER.[G]	1xTMT6plex [N-Term]; 1xDeamidated [N4(100)]	0.000558814	0	1	9	5	767922692	767922692 [587-600]	0	1770.87	N4(Deamidated): 100	15.7	9.1	9.8	9.4	9.6	19.3	11.5333	12.7667	1.10694	#N/A	Unique	2.81796	High	0	1.191e-05
SCARB1	949	132566684	NP_005496.4	102	Yes	Yes	5	NIT	REFRHKS	ITFNNND	Yes	High	[R].HKSNITFNNNDTVSFLEYR.[T]	2xTMT6plex [N-Term; K2]; 1xDeamidated [N4(100)]	0.00245935	0	1	2	2	132566684	132566684 [99-117]	1	2758.42	N4(Deamidated): 100	9.8	11.4	5.3	21	7.1	12.9	8.83333	13.6667	1.54717	#N/A	Unique	2.56661	High	0	9.691e-05
SCARB1	949	132566684	NP_005496.4	102	Yes	Yes	5	NIT	REFRHKS	ITFNNND	Yes	High	[R].HKSNITFNNNDTVSFLEYR.[T]	1xTMT6plex [K2]; 2xDeamidated [N4(100); N]	0.0192583	0	1	2	3	132566684	132566684 [99-117]	1	2530.24	N4(Deamidated): 100; N8(Deamidated): 33.33; N9(Deamidated): 33.33; N10(Deamidated): 33.33	10.3	10.1	6.1	17.7	8.2	7.6	8.83333	11.1667	1.26415	#N/A	Unique	1.74376	High	0	0.001774
SCARB1	949	132566684	NP_005496.4	102	Yes	Yes	5	NIT	REFRHKS	ITFNNND	Yes	High	[R].HKSNITFNNNDTVSFLEYR.[T]	2xTMT6plex [N-Term; K2]; 2xDeamidated [N4(100); N8(99.5)]	0.000292466	0	1	2	4	132566684	132566684 [99-117]	1	2759.4	N4(Deamidated): 100; N8(Deamidated): 99.47	16.9	13.4	8	30.8	11.2	15.6	12.7667	19.2	1.50392	#N/A	Unique	2.27728	High	0	4.771e-06
SCARB2	950	5031631	NP_005497.1	105	Yes	Yes	9	NGT	ANIQFGD	GTTISAV	Yes	High	[K].ANIQFGDNGTTISAVSNK.[A]	2xTMT6plex [N-Term; K18]; 2xDeamidated [N2(100); N8(100)]	6.36413e-06	0	1	1	8	5031631	5031631 [98-115]	0	2297.2	N2(Deamidated): 100; N8(Deamidated): 100	22.1	20.4	19.4	24.4	25.6	18.3	20.6333	22.7667	1.10339	1.03	Unique	3.7997	High	0	2.153e-08
SCARB2	950	5031631	NP_005497.1	105	Yes	Yes	9	NGT	ANIQFGD	GTTISAV	Yes	High	[K].ANIQFGDNGTTISAVSNK.[A]	2xTMT6plex [N-Term; K18]; 1xDeamidated [N]	1.28274e-09	0	1	1	14	5031631	5031631 [98-115]	0	2296.22	N8(Deamidated): 100	52.3	38.7	37.9	41.1	61.6	36.6	42.9667	46.4333	1.08068	1.03	Unique	4.3437	High	0	1.307e-13
SCARB2	950	5031631	NP_005497.1	105	Yes	Yes	9	NGT	ANIQFGD	GTTISAV	Yes	High	[K].ANIQFGDNGTTISAVSNK.[A]	1xTMT6plex [K18]; 1xDeamidated [N8(99.4)]	0.00945902	0	1	1	3	5031631	5031631 [98-115]	0	2067.06	N8(Deamidated): 100	8.6	9.6	7.2	7	10.9	7.4	8.46667	8.43333	0.996063	1.03	Unique	2.08676	High	0	0.0006498
SCARB2	950	5031631	NP_005497.1	105	Yes	Yes	11	NGT	ANIQFGD	GTTISAV	Yes	High	[R].NKANIQFGDNGTTISAVSNK.[A]	3xTMT6plex [N-Term; K2; K20]; 1xDeamidated [N10(99)]	2.80186e-05	0	1	1	4	5031631	5031631 [96-115]	1	2767.52	N10(Deamidated): 100	8.5	5.9	5.5	53.4	6.9	5.5	6.63333	21.9333	3.30653	1.03	Unique	3.01372	High	0	3.956e-06
SCARB2	950	5031631	NP_005497.1	105	Yes	Yes	11	NGT	ANIQFGD	GTTISAV	Yes	High	[R].NKANIQFGDNGTTISAVSNK.[A]	2xTMT6plex [K2; K20]; 1xDeamidated [N10(99.7)]	2.69638e-05	0	1	1	7	5031631	5031631 [96-115]	1	2538.36	N10(Deamidated): 99.74	11.5	9.4	11.3	38.2	10	12.1	10.7333	20.1	1.87267	1.03	Unique	2.89195	High	0	7.887e-07
SCARB2	950	5031631	NP_005497.1	105	Yes	Yes	11	NGT	ANIQFGD	GTTISAV	Yes	High	[R].NKANIQFGDNGTTISAVSNK.[A]	3xTMT6plex [N-Term; K2; K20]; 2xDeamidated [N1(99.8); N]	0.0186282	0	1	1	3	5031631	5031631 [96-115]	1	2768.5	N1(Deamidated): 50; N4(Deamidated): 50; N10(Deamidated): 100	7.5	4.7	5.3	45.1	8.1	5.2	5.83333	19.4667	3.33714	1.03	Unique	1.87097	High	0	0.001694
SCARB2	950	5031631	NP_005497.1	412	Yes	Yes	11	NES	VFPVMYL	ESVHIDK	Yes	High	[R].TMVFPVMYLNESVHIDKETASR.[L]	2xTMT6plex [N-Term; K17]; 2xOxidation [M2(100); M7(100)]; 1xDeamidated [N10(100)]	1.9023e-14	0	1	2	8	5031631	5031631 [403-424]	1	3058.56	M2(Oxidation): 100; M7(Oxidation): 100; N10(Deamidated): 100	53.9	40.2	31.2	20.8	55.6	28.2	41.7667	34.8667	0.834796	1.03	Unique	7.0716	High	0	1.991e-20
SCARB2	950	5031631	NP_005497.1	412	Yes	Yes	11	NES	VFPVMYL	ESVHIDK	Yes	High	[R].TMVFPVMYLNESVHIDKETASR.[L]	1xTMT6plex [K17]; 2xOxidation [M2(100); M7(100)]; 1xDeamidated [N10(100)]	6.18539e-08	0	1	2	8	5031631	5031631 [403-424]	1	2829.4	M2(Oxidation): 100; M7(Oxidation): 100; N10(Deamidated): 100	16.9	15.7	12.4	10.5	20.6	10.9	15	14	0.933333	1.03	Unique	4.10679	High	0	3.108e-11
SDK1	221935	119220552	NP_689957.3	1893	Yes	Yes	12	NIT	YGPELQA	ITAGPAE	No	High	[R].TITYGPELQANITAGPAEGSPGSPR.[D]	1xTMT6plex [N-Term]; 1xDeamidated [N11(100)]	5.27907e-07	0	1	5	2	119220552	119220552 [1883-1907]	0	2714.38	N11(Deamidated): 100	7.7	8.7	4.3	23.7	6.4	5.8	6.9	11.9667	1.7343	#N/A	Unique	2.88763	High	0	6.417e-10
SEL1L	6400	19923669	NP_005056.3	431	Yes	Yes	14	NET	SDIVPQS	ETALHYF	Yes	High	[K].MYSEGSDIVPQSNETALHYFK.[K]	1xTMT6plex [K21]; 1xOxidation [M1(100)]; 1xDeamidated [N13(100)]	7.24412e-06	0	1	2	5	19923669	19923669 [419-439]	0	2662.25	M1(Oxidation): 100; N13(Deamidated): 100	10.4	9.2	8.4	9.3	9.7	9.5	9.33333	9.5	1.01786	1.07	Unique	3.52592	High	0	2.584e-08
SEL1L	6400	19923669	NP_005056.3	431	Yes	Yes	14	NET	SDIVPQS	ETALHYF	Yes	High	[K].MYSEGSDIVPQSNETALHYFKK.[A]	2xTMT6plex [K21; K22]; 1xOxidation [M1(100)]; 1xDeamidated [N13(100)]	1.23373e-05	0	1	2	3	19923669	19923669 [419-440]	1	3019.51	M1(Oxidation): 100; N13(Deamidated): 100	10.2	8.2	7.3	10.2	8	9	8.56667	9.06667	1.05837	1.07	Unique	2.7635	High	0	5.469e-08
SEL1L	6400	19923669	NP_005056.3	608	Yes	Yes	9	NET	EASIVGE	ETYPRAL	Yes	High	[R].EASIVGENETYPR.[A]	1xTMT6plex [N-Term]; 1xDeamidated [N8(100)]	9.34513e-09	0	1	3	11	19923669	19923669 [601-613]	0	1694.84	N8(Deamidated): 100	100.4	66.7	66.7	68	81.8	81.2	77.9333	77	0.988024	1.07	Unique	5.39087	High	0	2.159e-12
SEL1L3	23231	154689719	NP_056002.2	382	Yes	Yes	5	NQT	QDLKSYH	QTISFRE	No	High	[K].SYHNQTISFR.[E]	1xTMT6plex [N-Term]; 1xDeamidated [N4(100)]	0.1603	0.00357109	1	5	2	154689719	154689719 [379-388]	0	1482.75	N4(Deamidated): 100	11.3	14.5	8.4	10.3	9.4	15.9	11.4	11.8667	1.04094	#N/A	Unique	1.31985	High	0.001331	0.03872
SEL1L3	23231	154689719	NP_056002.2	394	Yes	Yes	7	NDT	FREDFHY	DTAGYFI	No	High	[R].EDFHYNDTAGYFIIGGSR.[Y]	1xTMT6plex [N-Term]; 1xDeamidated [N6(100)]	0.016227	0	1	5	3	154689719	154689719 [389-406]	0	2292.08	N6(Deamidated): 100	10.2	6.5	7.2	6.7	9.2	9.5	7.96667	8.46667	1.06276	#N/A	Unique	2.15066	High	0	0.001395
SEL1L3	23231	154689719	NP_056002.2	527	Yes	Yes	4	NES	LTVPRNQ	ESVSEIG	No	High	[R].NQNESVSEIGGK.[I]	2xTMT6plex [N-Term; K12]; 1xDeamidated [N]	0.127714	0.00315632	1	5	3	154689719	154689719 [525-536]	0	1720.91	N3(Deamidated): 99.77	18.6	26.3	7.6	8.4	38.5	5.4	17.5	17.4333	0.99619	#N/A	Unique	1.55585	High	0.001589	0.04001
SEL1L3	23231	154689719	NP_056002.2	527	Yes	Yes	4	NES	LTVPRNQ	ESVSEIG	No	High	[R].NQNESVSEIGGK.[I]	1xTMT6plex [K12]; 1xDeamidated [N3(100)]	0.000116449	0	1	5	6	154689719	154689719 [525-536]	0	1491.75	N3(Deamidated): 100	17.5	25	11.3	11	37.8	10.9	17.9333	19.9	1.10967	#N/A	Unique	3.13275	High	0	6.195e-06
SEMA3C	10512	5454048	NP_006370.1	123	Yes	Yes	7	NRT	VRVIQTF	RTHLYVC	No	High	[R].VIQTFNR.[T]	1xTMT6plex [N-Term]; 1xDeamidated [N6(100)]	0.0299114	0	1	2	1	5454048	5454048 [118-124]	0	1107.64	N6(Deamidated): 100	217.1	35.6	50.9	45.8	52.9	71.8	101.2	56.8333	0.561594	#N/A	Unique	2.63952	High	0	0.00333
SEMA4B	10509	1022436959	NP_001310960.1	578	Yes	Yes	19	NCS	VVQVPMA	CSLYRSC	No	High	[R].GLLYAASHSGVVQVPMANCSLYR.[S]	1xCarbamidomethyl [C19]; 1xTMT6plex [N-Term]; 1xOxidation [M16(100)]; 1xDeamidated [N18(100)]	0.143484	0.00357109	1	6	2	1022436959	1022436959 [561-583]	0	2739.38	M16(Oxidation): 100; N18(Deamidated): 100	8	7.7	8	9.6	5.5	8.3	7.9	7.8	0.987342	#DIV/0!	Unique	1.49952	High	0.001331	0.03272
SEMA4B	10509	1022436959	NP_001310960.1	463	Yes	Yes	4	NSS	SARERKI	SSLQLPD	No	High	[R].KINSSLQLPDR.[V]	2xTMT6plex [K1; N-Term]; 1xDeamidated [N3(100)]	0.00295091	0	1	6	2	1022436959	1022436959 [461-471]	1	1730.02	N3(Deamidated): 100	13.9	41.1	9.2	5.1	16.3	5.9	21.4	9.1	0.425234	#DIV/0!	Unique	1.84357	High	0	0.0001248
SEMA4B	10509	1022436959	NP_001310960.1	463	Yes	Yes	4	NSS	SARERKI	SSLQLPD	No	High	[R].KINSSLQLPDR.[V]	1xTMT6plex [K1]; 1xDeamidated [N3(100)]	0.0415596	0	1	6	3	1022436959	1022436959 [461-471]	1	1500.86	N3(Deamidated): 100	7.9	6.8	3.5	4.3	3.7	5.3	6.06667	4.43333	0.730769	#DIV/0!	Unique	1.89588	High	0	0.005346
SEMA4D	10507	767956029	XP_011516427.1	419	Yes	Yes	4	NYT	RLIKKDV	YTQIVVD	Yes	High	[K].DVNYTQIVVDR.[T]	1xTMT6plex [N-Term]; 1xDeamidated [N3(100)]	0.000979387	0	1	3	3	767956029	767956029 [417-427]	0	1551.82	N3(Deamidated): 100	21	30.2	24.5	13.4	18.9	17.3	25.2333	16.5333	0.655218	#N/A	Unique	2.69883	High	0	2.634e-05
SEMA4D	10507	767956029	XP_011516427.1	379	Yes	Yes	4	NYT	DSEARAA	YTSSLNL	Yes	High	[R].AANYTSSLNLPDK.[T]	2xTMT6plex [N-Term; K13]; 1xDeamidated [N3(99.5)]	0.150009	0.00357109	1	3	1	767956029	767956029 [377-389]	0	1853.01	N3(Deamidated): 100	9.6	8.9	7.1	5.9	5.5	6.2	8.53333	5.86667	0.6875	#N/A	Unique	1.45054	High	0.001331	0.03502
SEMA7A	8482	4504237	NP_003603.1	258	Yes	Yes	14	NVS	KNPEAPL	VSRVAQL	No	High	[R].EDNPDKNPEAPLNVSR.[V]	2xTMT6plex [N-Term; K6]; 2xDeamidated [N7(100); N13(100)]	0.149345	0.00357109	1	3	1	4504237	4504237 [246-261]	1	2255.16	N7(Deamidated): 100; N13(Deamidated): 100	11.1	40.1	5.6	8.3	23.3	13.7	18.9333	15.1	0.797535	#N/A	Unique	1.76312	High	0.001331	0.03486
SEMA7A	8482	4504237	NP_003603.1	258	Yes	Yes	14	NVS	KNPEAPL	VSRVAQL	No	High	[R].EDNPDKNPEAPLNVSR.[V]	2xTMT6plex [N-Term; K6]; 1xDeamidated [N13(100)]	4.2338e-07	0	1	3	3	4504237	4504237 [246-261]	1	2254.17	N13(Deamidated): 100	12.3	47.8	6.8	13	38.1	10.6	22.3	20.5667	0.922272	#N/A	Unique	3.25636	High	0	4.698e-10
SEMA7A	8482	4504237	NP_003603.1	258	Yes	Yes	14	NVS	KNPEAPL	VSRVAQL	No	High	[R].EDNPDKNPEAPLNVSR.[V]	1xTMT6plex [K6]; 1xDeamidated [N13(100)]	0.00632491	0	1	3	4	4504237	4504237 [246-261]	1	2025.01	N13(Deamidated): 100	10	13.7	7.5	10.3	11.9	9.1	10.4	10.4333	1.00321	#N/A	Unique	1.86415	High	0	0.0003681
SERPINH1	871	32454741	NP_001226.2	120	Yes	Yes	5	NST	ELLRSLS	STARNVT	No	High	[R].SLSNSTAR.[N]	1xTMT6plex [N-Term]; 1xDeamidated [N4(100)]	0.00196309	0	1	1	17	32454741	32454741 [117-124]	0	1065.57	N4(Deamidated): 100	352.3	25.9	158.1	937.9	536.7	26.7	178.767	500.433	2.79937	1.52	Unique	2.98792	High	0.002989	0.05842
SEZ6L2	26470	343183403	NP_001230261.1	247	Yes	Yes	5	NSS	LAPRLLA	SSMLGEG	Yes	High	[R].LLANSSMLGEGQVLR.[S]	1xTMT6plex [N-Term]; 1xOxidation [M7(100)]; 1xDeamidated [N4(100)]	0.000167668	0	1	6	4	343183403	343183403 [244-258]	0	1833.99	N4(Deamidated): 100; M7(Oxidation): 100	5.5	3.6	3.2	3.6	2.6		4.1	3.1	0.756098	#N/A	Unique	2.81889	High	0	2.176e-06
SGCB	6443	4506913	NP_000223.1	211	Yes	Yes	5	NAT	STERITS	ATSDLNI	No	High	[R].ITSNATSDLNIK.[V]	1xTMT6plex [K12]; 1xDeamidated [N4(100)]	0.00430992	0	1	1	3	4506913	4506913 [208-219]	0	1506.82	N4(Deamidated): 100	10.8	10.7	10.6	12.2	11.9	12.4	10.7	12.1667	1.13707	#N/A	Unique	2.45291	High	0	0.0002646
SGCE	8910	767948966	XP_011514965.1	236	Yes	Yes	6	NIT	PERLNAI	ITSALDR	No	High	[R].LNAINITSALDR.[G]	1xTMT6plex [N-Term]; 1xDeamidated [N5(100)]	0.0119572	0	1	18	2	767948966	767948966 [232-243]	0	1530.87	N5(Deamidated): 100	38.4	11.8	17.2	17	13.7	27	22.4667	19.2333	0.856083	#N/A	Unique	2.23977	High	0	0.0009014
SIAE	54414	24850115	NP_733746.1	401	Yes	Yes	9	NLT	ALAYGEK	LTFEGPL	Yes	High	[R].ALAYGEKNLTFEGPLPEK.[I]	3xTMT6plex [N-Term; K7; K18]; 1xDeamidated [N8(100)]	0.000580671	0	1	3	2	24850115	24850115 [394-411]	1	2665.51	N8(Deamidated): 100	21.2	38.8	42.5	17.2	26.3	26.2	34.1667	23.2333	0.68	#N/A	Unique	2.27838	High	0	1.262e-05
SIDT2	51092	94721340	NP_001035545.1	165	Yes	Yes	9	NTT	TGEQFSF	TTAAQPQ	Yes	High	[R].TGEQFSFNTTAAQPQYFK.[Y]	1xTMT6plex [K18]; 1xDeamidated [N8(100)]	0.190864	0.00695865	1	1	2	94721340	94721340 [158-175]	0	2295.11	N8(Deamidated): 100	9.5	7.5	8	8.2	10.5	9.9	8.33333	9.53333	1.144	#N/A	Unique	1.37484	High	0.002301	0.05038
SIL1	64374	767936329	XP_011541872.1	203	Yes	Yes	3	NSS	VRLINKF	SSSSSLE	No	High	[K].FNSSSSSLEEK.[I]	2xTMT6plex [N-Term; K11]; 1xDeamidated [N2(100)]	6.42548e-06	0	1	2	2	767936329	767936329 [202-212]	0	1673.86	N2(Deamidated): 100	62.3	26.7	51.3	23.2	75.8	104.6	46.7667	67.8667	1.45118	#N/A	Unique	3.06781	High	0	2.178e-08
SIL1	64374	767936329	XP_011541872.1	203	Yes	Yes	3	NSS	VRLINKF	SSSSSLE	No	High	[K].FNSSSSSLEEK.[I]	1xTMT6plex [K11]; 1xDeamidated [N2(100)]	0.00189829	0	1	2	3	767936329	767936329 [202-212]	0	1444.7	N2(Deamidated): 100	20.2	9	16.5	10	26.7	20.9	15.2333	19.2	1.26039	#N/A	Unique	2.60257	High	0	6.709e-05
SIL1	64374	767936329	XP_011541872.1	203	Yes	No	7	NSS	VRLINKF	SSSSSLE	No	High	[R].LINKFNSSSSSLEEK.[I]	3xTMT6plex [N-Term; K4; K15]; 1xDeamidated [N]	0.000770577	0	1	2	5	767936329	767936329 [198-212]	1	2371.33	N3(Deamidated): 50; N6(Deamidated): 50	21.4	11.4	14.4	16.6	21.7	71.3	15.7333	36.5333	2.32203	#N/A	Unique	1.87517	High	0	1.876e-05
SIL1	64374	767936329	XP_011541872.1	203	Yes	No	7	NSS	VRLINKF	SSSSSLE	No	High	[R].LINKFNSSSSSLEEK.[I]	2xTMT6plex [K4; K15]; 1xDeamidated [N]	0.0244122	0	1	2	6	767936329	767936329 [198-212]	1	2142.17	N3(Deamidated): 50; N6(Deamidated): 50	19.5	22.5	18.8	8.6	23.4	33.6	20.2667	21.8667	1.07895	#N/A	Unique	2.08381	High	0	0.002501
SIRPA	140885	530425626	XP_005260726.1	270	Yes	Yes	7	NVT	VRAENQV	VTCQVRK	Yes	High	[R].AENQVNVTCQVR.[K]	1xCarbamidomethyl [C9]; 1xTMT6plex [N-Term]; 1xDeamidated [N]	0.00234421	0	1	5	6	530425626	530425626 [265-276]	0	1647.83	N6(Deamidated): 100	29.6	21	49.1	23.4	46.1	44.9	33.2333	38.1333	1.14744	#N/A	Unique	2.1378	High	0	9.039e-05
SIRPA	140885	530425626	XP_005260726.1	245	Yes	Yes	5	NLS	DPLRGTA	LSETIRV	Yes	High	[R].GTANLSETIR.[V]	1xTMT6plex [N-Term]; 1xDeamidated [N4(100)]	0.00306631	0	1	5	9	530425626	530425626 [242-251]	0	1291.71	N4(Deamidated): 100	32.9	36.8	134.1	40.3	101.1	106	67.9333	82.4667	1.21394	#N/A	Unique	2.71616	High	0	0.001106
SIRPA	140885	530425626	XP_005260726.1	245	Yes	Yes	5	NLS	DPLRGTA	LSETIRV	Yes	High	[R].GTANLSETIRVPPTLEVTQQPVR.[A]	1xTMT6plex [N-Term]; 1xDeamidated [N4(100)]	0.0297707	0	1	5	2	530425626	530425626 [242-264]	1	2736.51	N4(Deamidated): 100	8.9	7.7	15.6	8	12.9	9.9	10.7333	10.2667	0.956522	#N/A	Unique	1.58587	High	0	0.003319
SIRPB1	10326	144953876	NP_006056.2	150	Yes	Yes	5	NLS	RGPECSQ	YTTPSGV	No	High	[R].GTANLSEAIR.[EVGA]	1xTMT6plex [N-Term]; 1xDeamidated [N4(100)]	0.00608691	0	1	12	3	144953876	144953876 [241-250]	0	1261.69	N4(Deamidated): 100	13	10.6	13.1	15.8	56.3	14.9	12.2333	29	2.37057	#N/A	Unique	2.04133	High	0	0.0003473
SLC15A4	121260	1034577915	XP_016874280.1	140	Yes	Yes	4	NCT	CGSARLL	CTAPGPD	No	High	[R].LLNCTAPGPDAAAR.[C]	1xCarbamidomethyl [C4]; 1xTMT6plex [N-Term]; 1xDeamidated [N3(100)]	0.000755936	0	1	5	3	1034577915	1034577915 [138-151]	0	1656.86	N3(Deamidated): 100	17	14.4	14.9	13.3	19.2	16.3	15.4333	16.2667	1.054	#N/A	Unique	2.51521	High	0	1.83e-05
SLC17A5	26503	6912666	NP_036566.1	95	Yes	Yes	5	NQT	APIKVHH	QTGKKYQ	No	High	[K].VHHNQTGK.[K]	2xTMT6plex [N-Term; K8]; 1xDeamidated [N4(100)]	0.0290768	0	1	4	5	6912666	6912666 [92-99]	0	1379.78	N4(Deamidated): 100	25.2	11.8	19.9	9	22.3	18.9	18.9667	16.7333	0.88225	#N/A	Unique	1.97402	High	0.000164	0.006829
SLC17A5	26503	6912666	NP_036566.1	95	Yes	Yes	5	NQT	APIKVHH	QTGKKYQ	No	High	[K].VHHNQTGK.[K]	1xTMT6plex [K8]; 1xDeamidated [N4(100)]	0.205306	0.00881471	1	4	3	6912666	6912666 [92-99]	0	1150.62	N4(Deamidated): 100	10	3.6	7.5	5.1	11	6.9	7.03333	7.66667	1.09005	#N/A	Unique	1.55481	High	0.00975	0.1574
SLC1A4	6509	21314632	NP_003029.2	201	Yes	Yes	6	NSS	DYKVVTQ	SSSGNVT	Yes	High	[K].VVTQNSSSGNVTHEK.[I]	2xTMT6plex [N-Term; K15]; 2xDeamidated [N5(100); N10(100)]	0.0029651	0	1	1	3	21314632	21314632 [197-211]	0	2047.07	N5(Deamidated): 100; N10(Deamidated): 100	10.6	17.9	11.4	19.5	9.7	7.4	13.3	12.2	0.917293	#N/A	Unique	2.67265	High	0	0.0001264
SLC1A5	6510	5032093	NP_005619.1	212	Yes	Yes	11	NIT	STTYEER	ITGTRVK	No	High	[R].SYSTTYEERNITGTR.[V]	1xTMT6plex [N-Term]; 1xDeamidated [N10(100)]	1.48796e-07	0	1	2	9	5032093	5032093 [203-217]	1	2007.98	N10(Deamidated): 100	111.3	352.8	128.4	496.7	64.2	252	197.5	270.967	1.37198	1.24	Unique	4.96318	High	0	1.714e-09
SLC29A1	2030	767939357	XP_011512643.1	128	Yes	Yes	7	NVS	NRLDMSQ	VSLVTAE	No	High	[R].LDMSQNVSLVTAELSK.[D]	2xTMT6plex [N-Term; K16]; 1xOxidation [M3(100)]; 1xDeamidated [N6(100)]	2.52273e-09	0	1	7	5	767939357	767939357 [123-138]	0	2210.2	M3(Oxidation): 100; N6(Deamidated): 100	139.9	201.8	118.6	174.8	112.9	247.7	153.433	178.467	1.16315	0.85	Unique	5.33871	High	0	2.122e-08
SLC29A1	2030	767939357	XP_011512643.1	128	Yes	Yes	7	NVS	NRLDMSQ	VSLVTAE	No	High	[R].LDMSQNVSLVTAELSK.[D]	1xTMT6plex [K16]; 1xOxidation [M3(100)]; 1xDeamidated [N6(100)]	0.0586697	0.000598249	1	7	4	767939357	767939357 [123-138]	0	1981.04	M3(Oxidation): 100; N6(Deamidated): 100	6.5	9.2	8.6	4.6	7.9	7.7	8.1	6.73333	0.831276	0.85	Unique	1.31642	High	0.00084	0.02814
SLC2A1	6513	166795299	NP_006507.2	45	Yes	Yes	8	NQT	KVIEEFY	QTWVHRY	Yes	High	[K].VIEEFYNQTWVHR.[Y]	1xTMT6plex [N-Term]; 1xDeamidated [N7(100)]	7.17705e-08	0	1	1	9	166795299	166795299 [39-51]	0	1950.99	N7(Deamidated): 100	26.3	52.3	27.9	22.2	19.8	44.1	35.5	28.7	0.808451	1.14	Unique	5.43665	High	0	3.829e-11
SLC39A10	57181	767918935	XP_011509807.1	218	Yes	Yes	13	NKT	NEPSTET	KTQEQSD	No	High	[R].GEPSNEPSTETNKTQEQSDVK.[L]	3xTMT6plex [N-Term; K13; K21]; 2xDeamidated [N5(100); N12(100)]	0.00788511	0	1	3	1	767918935	767918935 [207-227]	1	2994.5	N5(Deamidated): 100; N12(Deamidated): 100	9.8	7.9	14	7.9	10.6	16.5	10.5667	11.6667	1.1041	#N/A	Unique	1.91005	High	0	0.0005004
SLC39A10	57181	767918935	XP_011509807.1	218	Yes	Yes	13	NKT	NEPSTET	KTQEQSD	No	High	[R].GEPSNEPSTETNKTQEQSDVK.[L]	3xTMT6plex [N-Term; K13; K21]; 1xDeamidated [N12(100)]	3.33048e-06	0	1	3	5	767918935	767918935 [207-227]	1	2993.52	N12(Deamidated): 100	9.3	10.9	16.4	8.1	13.8	19.4	12.2	13.7667	1.12842	#N/A	Unique	3.51196	High	0	8.619e-09
SLC39A14	23516	1034659852	XP_016868781.1	87	Yes	Yes	3	NVT	DVGVGRG	VTQHVQG	No	High	[R].GNVTQHVQGHR.[N]	1xTMT6plex [N-Term]; 1xDeamidated [N2(100)]	0.000766891	0	1	5	24	1034659852	1034659852 [86-96]	0	1462.77	N2(Deamidated): 100	101.7	36.1	56.2	58.9	68	207.3	64.6667	111.4	1.72268	1.05	Unique	3.34913	High	0.0005939	0.01795
SLC39A6	25800	153252201	NP_036451.3	241	Yes	Yes	3	NES	RLAGRKT	ESVSEPR	Yes	High	[K].TNESVSEPR.[K]	1xTMT6plex [N-Term]; 1xDeamidated [N2(100)]	0.0404083	0	1	2	3	153252201	153252201 [240-248]	0	1248.63	N2(Deamidated): 100	4.9	15.5	15.1	19.1	9.1	10.8	11.8333	13	1.09859	#N/A	Unique	2.24392	High	0	0.005149
SLC39A6	25800	153252201	NP_036451.3	241	Yes	Yes	4	NES	RLAGRKT	ESVSEPR	Yes	High	[R].KTNESVSEPR.[K]	2xTMT6plex [K1; N-Term]; 1xDeamidated [N3(100)]	0.000157532	0	1	2	5	153252201	153252201 [239-248]	1	1605.88	N3(Deamidated): 100	15.2	46.3	48.3	68.7	32.1	29.9	36.6	43.5667	1.19035	#N/A	Unique	3.86386	High	0	1.992e-06
SLC39A6	25800	153252201	NP_036451.3	241	Yes	Yes	4	NES	RLAGRKT	ESVSEPR	Yes	High	[R].KTNESVSEPR.[K]	1xTMT6plex [K1]; 1xDeamidated [N3(100)]	0.0180183	0	1	2	5	153252201	153252201 [239-248]	1	1376.72	N3(Deamidated): 100	10.5	10.9	15.8	9.6	10.2	9.7	12.4	9.83333	0.793011	#N/A	Unique	2.07302	High	0.000164	0.009393
SLC39A6	25800	153252201	NP_036451.3	266	Yes	Yes	12	NAS	ENPQECF	ASKLLTS	Yes	High	[R].NTNENPQECFNASK.[L]	1xCarbamidomethyl [C9]; 2xTMT6plex [N-Term; K14]; 1xDeamidated [N11(100)]	0.00138993	0	1	2	1	153252201	153252201 [256-269]	0	2112.01	N11(Deamidated): 100	10.8	18.3	17.3	9.8	10.8	10.9	15.4667	10.5	0.678879	#N/A	Unique	1.87292	High	0	4.333e-05
SLC39A6	25800	153252201	NP_036451.3	67	Yes	Yes	5	NNS	LFYRYGE	NSLSVEG	Yes	High	[R].YGENNSLSVEGFR.[K]	1xTMT6plex [N-Term]; 1xDeamidated [N4(99.4)]	0.053966	0.000598249	1	2	1	153252201	153252201 [64-76]	0	1701.83	N4(Deamidated): 99.62	17.8	32.4	39.8	25.3	28	33.1	30	28.8	0.96	#N/A	Unique	1.63126	High	0.000164	0.007801
SLC39A6	25800	153252201	NP_036451.3	67	Yes	Yes	5	NNS	LFYRYGE	NSLSVEG	Yes	High	[R].YGENNSLSVEGFRK.[L]	1xTMT6plex [K14]; 1xDeamidated [N4(99.7)]	0.00497668	0	1	2	2	153252201	153252201 [64-77]	1	1829.92	N4(Deamidated): 99.71	29	20	20.6	32	24.6	22.2	23.2	26.2667	1.13218	#N/A	Unique	2.14092	High	0	0.000262
SLC3A2	6520	61744477	NP_001012680.1	366	Yes	Yes	12	NIT	SFLAEWQ	ITKGFSE	No	High	[K].DASSFLAEWQNITK.[G]	2xTMT6plex [N-Term; K14]; 1xDeamidated [N11(100)]	4.3561e-05	0	1	4	2	61744477	61744477 [356-369]	0	2069.1	N11(Deamidated): 100	185.8	350.2	264.8	133.1	178.5	173.3	266.933	161.633	0.605519	0.69	Unique	3.98919	High	0	3.247e-07
SLC3A2	6520	61744477	NP_001012680.1	425	Yes	Yes	9	NAT	SLVTQYL	ATGNRWC	No	High	[K].SLVTQYLNATGNR.[W]	1xTMT6plex [N-Term]; 2xDeamidated [N8(100); N12(100)]	1.77641e-05	0	1	4	7	61744477	61744477 [418-430]	0	1667.88	N8(Deamidated): 100; N12(Deamidated): 100	51.4	129.4	59.9	59.9	44.3	53.1	80.2333	52.4333	0.653511	0.69	Unique	3.64677	High	0	9.139e-08
SLC3A2	6520	61744477	NP_001012680.1	425	Yes	Yes	9	NAT	SLVTQYL	ATGNRWC	No	High	[K].SLVTQYLNATGNR.[W]	1xTMT6plex [N-Term]; 1xDeamidated [N8(100)]	1.38487e-08	0	1	4	14	61744477	61744477 [418-430]	0	1666.9	N8(Deamidated): 100	65	192.9	74.1	61.9	49.1	53.7	110.667	54.9	0.496084	0.69	Unique	5.03944	High	0	3.755e-12
SLC3A2	6520	61744477	NP_001012680.1	366	Yes	Yes	18	NIT	SFLAEWQ	ITKGFSE	No	High	[R].DIENLKDASSFLAEWQNITK.[G]	3xTMT6plex [N-Term; K6; K20]; 1xDeamidated [N17(100)]	4.44248e-08	0	1	4	2	61744477	61744477 [350-369]	1	3010.63	N4(Deamidated): 100	140.3	211.9	127.7	214.2	98.4	99.2	159.967	137.267	0.858095	0.69	Unique	5.36532	High	0	1.949e-11
SLC3A2	6520	61744477	NP_001012680.1	382	Yes	Yes	8	NSS	RLLIAGT	SSDLQQI	No	High	[R].LLIAGTNSSDLQQILSLLESNK.[D]	2xTMT6plex [N-Term; K22]; 1xDeamidated [N7(100)]	4.40135e-10	0	1	4	4	61744477	61744477 [376-397]	0	2816.6	N7(Deamidated): 100	46.8	83.5	48.4	26.8	39.7	40.2	59.5667	35.5667	0.59709	0.69	Unique	6.23004	High	0	3.688e-14
SLC44A2	57153	530415036	XP_005260054.1	187	Yes	Yes	8	NET	KGVLMVG	ETTYEDG	Yes	High	[K].GVLMVGNETTYEDGHGSR.[K]	1xTMT6plex [N-Term]; 1xOxidation [M4(100)]; 1xDeamidated [N7(100)]	8.3653e-06	0	1	4	7	530415036	530415036 [181-198]	0	2168.01	M4(Oxidation): 100; N7(Deamidated): 100	12.7	12.9	10.6	13.1	14.2	12.7	12.0667	13.3333	1.10497	#N/A	Unique	3.24932	High	0	8.394e-08
SLC44A2	57153	530415036	XP_005260054.1	187	Yes	Yes	8	NET	KGVLMVG	ETTYEDG	Yes	High	[K].GVLMVGNETTYEDGHGSRK.[N]	2xTMT6plex [N-Term; K19]; 1xOxidation [M4(100)]; 1xDeamidated [N7(100)]	0.000522526	0	1	4	2	530415036	530415036 [181-199]	1	2525.27	M4(Oxidation): 100; N7(Deamidated): 100	9.9	10.3	6.5	7	8.5	9.5	8.9	8.33333	0.93633	#N/A	Unique	2.29834	High	0	1.084e-05
SLC44A2	57153	530415036	XP_005260054.1	187	Yes	Yes	8	NET	KGVLMVG	ETTYEDG	Yes	High	[K].GVLMVGNETTYEDGHGSRKNITDLVEGAK.[K]	3xTMT6plex [N-Term; K19; K29]; 1xOxidation [M4(100)]; 2xDeamidated [N7(100); N20(100)]	0.00847258	0	1	4	2	530415036	530415036 [181-209]	2	3795.97	M4(Oxidation): 100; N7(Deamidated): 100; N20(Deamidated): 100	7.5	8.3	6.5	6.6	8.1		7.43333	7.35	0.988789	#N/A	Unique	2.13114	High	0	0.0005561
SLC44A2	57153	530415036	XP_005260054.1	187	Yes	Yes	8	NET	KGVLMVG	ETTYEDG	Yes	High	[K].GVLMVGNETTYEDGHGSRKNITDLVEGAK.[K]	3xTMT6plex [N-Term; K19; K29]; 1xOxidation [M4(100)]; 1xDeamidated [N7(98.8)]	0.00706217	0	1	4	3	530415036	530415036 [181-209]	2	3794.98	M4(Oxidation): 100; N7(Deamidated): 98.82	10.2	8.1	20.2	10.3	12.4	6.3	12.8333	9.66667	0.753247	#N/A	Unique	2.56933	High	0	0.0004301
SLC44A2	57153	530415036	XP_005260054.1	200	Yes	Yes	2	NIT	DGHGSRK	ITDLVEG	Yes	High	[K].NITDLVEGAK.[K]	1xTMT6plex [K10]; 1xDeamidated [N1(100)]	0.0229546	0	1	4	4	530415036	530415036 [200-209]	0	1289.72	N1(Deamidated): 100	8.6	13.1	6.3	4.9	10.4	7.6	9.33333	7.63333	0.817857	#N/A	Unique	2.07957	High	0	0.004574
SLC44A2	57153	530415036	XP_005260054.1	200	Yes	Yes	3	NIT	DGHGSRK	ITDLVEG	Yes	High	[R].KNITDLVEGAK.[K]	3xTMT6plex [K1; N-Term; K11]; 1xDeamidated [N2(100)]	1.67705e-05	0	1	4	3	530415036	530415036 [199-209]	1	1876.14	N2(Deamidated): 100	13.9	22.7	12.9	10.3	22.1	9.8	16.5	14.0667	0.852525	#N/A	Unique	2.83046	High	0	8.474e-08
SLC46A1	113235	31543204	NP_542400.2	58	Yes	Yes	9	NGT	FSADLGY	GTRQRGG	Yes	High	[R].FSADLGYNGTR.[Q]	1xTMT6plex [N-Term]; 1xDeamidated [N8(100)]	0.035769	0	1	3	2	31543204	31543204 [51-61]	0	1430.71	N8(Deamidated): 100	19.4	41.4	20.7	18.3	14.3	26.1	27.1667	19.5667	0.720245	#N/A	Unique	2.33706	High	0	0.004322
SLC7A1	6541	1034584849	XP_016876204.1	235	Yes	Yes	6	NDT	SGRLCLN	DTKEGKP	No	High	[R].LCLNNDTK.[E]	1xCarbamidomethyl [C2]; 2xTMT6plex [N-Term; K8]; 1xDeamidated [N]	0.0404083	0	1	2	5	1034584849	1034584849 [231-238]	0	1436.78	N5(Deamidated): 99.86	35.7	67.4	29.8	22.7	24	31.8	44.3	26.1667	0.59067	1.13	Unique	2.20053	High	0	0.005148
SLC9A7	84679	1034675498	XP_016885394.1	145	Yes	Yes	9	NVS	AFSTLLV	VSGKFFE	No	High	[R].AFSTLLVNVSGK.[F]	1xTMT6plex [K12]; 1xDeamidated [N8(100)]	0.00331082	0	1	3	4	1034675498	1034675498 [138-149]	0	1465.85	N8(Deamidated): 100	8.5	9	13.3	7.7	11.1	11.5	10.2667	10.1	0.983766	#N/A	Unique	2.26847	High	0	0.0001468
SLIT2	9353	530376407	XP_005248268.1	1270	Yes	Yes	5	NLS	GNPKIIT	LSKQSTL	No	High	[K].IITNLSK.[Q]	2xTMT6plex [N-Term; K7]; 1xDeamidated [N4(100)]	0.043959	0	1	8	1	530376407	530376407 [1267-1273]	0	1247.8	N4(Deamidated): 100	23.8	8.5	22.2	53	10.6	10.9	18.1667	24.8333	1.36697	#N/A	Unique	2.18995	High	0	0.005787
SLIT2	9353	530376407	XP_005248268.1	186	Yes	Yes	12	NIT	VLTLNNN	ITRLSVA	No	High	[R].DLEVLTLNNNNITR.[L]	1xTMT6plex [N-Term]; 1xDeamidated [N8(99.4)]	0.000339349	0	1	7	7	530376407	530376407 [176-189]	0	1859.01	N8(Deamidated): 99.4	21.8	8.1	28	32.8	21.8	17.2	19.3	23.9333	1.24007	#N/A	Unique	2.28562	High	0	5.883e-06
SLIT2	9353	530376407	XP_005248268.1	66	Yes	Yes	8	NIT	RLDLNGN	ITRITKT	No	High	[R].LDLNGNNITR.[I]	1xTMT6plex [N-Term]; 2xDeamidated [N4(100); N]	0.00320154	0	1	5	2	530376407	530376407 [60-69]	0	1360.73	N4(Deamidated): 100; N6(Deamidated): 50; N7(Deamidated): 50	19.9	8.8	25	28.2	15.1	10.6	17.9	17.9667	1.00372	#N/A	Unique	2.01285	High	0	0.0001405
SLIT2	9353	530376407	XP_005248268.1	66	Yes	Yes	12	NIT	RLDLNGN	ITRITKT	No	High	[R].NTERLDLNGNNITR.[I]	1xTMT6plex [N-Term]; 2xDeamidated [N8(100); N]	0.116697	0.00315632	1	5	2	530376407	530376407 [56-69]	1	1860.96	N8(Deamidated): 100; N10(Deamidated): 50; N11(Deamidated): 50	9	9.5	8.4	26.4	6.1	8.7	8.96667	13.7333	1.5316	#N/A	Unique	1.67425	High	0.00084	0.02407
SMPDL3B	27293	767903801	XP_011539561.1	373	Yes	Yes	9	NLS	DMVTYFM	LSQANAQ	No	High	[K].DMVTYFMNLSQANAQGTPR.[W]	1xTMT6plex [N-Term]; 2xOxidation [M2(100); M7(100)]; 1xDeamidated [N8(100)]	0.000102304	0	1	4	7	767903801	767903801 [366-384]	0	2406.13	M2(Oxidation): 100; M7(Oxidation): 100; N8(Deamidated): 100	16.2	15	18.7	20.3	15	17.1	16.6333	17.4667	1.0501	#N/A	Unique	3.88049	High	0	1.297e-06
SORL1	6653	4507157	NP_003096.1	1894	Yes	Yes	9	NKT	SLTTSLH	KTVIVSK	No	High	[K].SLTTSLHNK.[T]	2xTMT6plex [N-Term; K9]; 1xDeamidated [N8(100)]	0.130031	0.00315632	1	7	1	4507157	4507157 [1887-1895]	0	1459.85	N8(Deamidated): 100	6.8	19.7	5.7	5.2	4	8.3	10.7333	5.83333	0.543478	#N/A	Unique	2.05237	High	0.00084	0.02828
SORL1	6653	4507157	NP_003096.1	1986	Yes	Yes	4	NST	SYKVKSR	STVEYTL	No	High	[K].SRNSTVEYTLNK.[L]	2xTMT6plex [N-Term; K12]; 1xDeamidated [N3(100)]	0.0352684	0	1	7	4	4507157	4507157 [1984-1995]	1	1871.03	N3(Deamidated): 100	10.7	33.8	8.4	7.4	5.8	22.6	17.6333	11.9333	0.676749	#N/A	Unique	2.22285	High	0.001833	0.04251
SORL1	6653	4507157	NP_003096.1	1608	Yes	Yes	8	NKT	KTLETHS	KTNTVLK	No	High	[K].TLETHSNK.[T]	2xTMT6plex [N-Term; K8]; 1xDeamidated [N7(100)]	0.108043	0.00274374	1	8	2	4507157	4507157 [1602-1609]	0	1388.78	N7(Deamidated): 100	11.2	33.4	9.6	7.3	6.4	41.3	18.0667	18.3333	1.01476	#N/A	Unique	2.06775	High	0.0007256	0.0216
SORL1	6653	4507157	NP_003096.1	1706	Yes	Yes	5	NFT	ASQRAAS	FTEIKNL	No	High	[R].AASNFTEIK.[N]	2xTMT6plex [N-Term; K9]; 1xDeamidated [N4(100)]	0.000844091	0	1	8	3	4507157	4507157 [1703-1711]	0	1439.81	N4(Deamidated): 100	17.7	117.6	22.4	16.6	10.1	49.6	52.5667	25.4333	0.48383	#N/A	Unique	2.93463	High	0	2.14e-05
SORL1	6653	4507157	NP_003096.1	871	Yes	Yes	6	NSS	DFRLTIV	SSVLDRP	No	High	[R].LTIVNSSVLDRPR.[A]	1xTMT6plex [N-Term]; 1xDeamidated [N5(100)]	0.00150798	0	1	6	4	4507157	4507157 [867-879]	0	1699.99	N5(Deamidated): 100		16.7	3.3		2.7	7.4	10	5.05	0.505	#N/A	Unique	2.19771	High	0	4.861e-05
SORL1	6653	4507157	NP_003096.1	1986	Yes	Yes	2	NST	SYKVKSR	STVEYTL	No	High	[R].NSTVEYTLNK.[L]	1xTMT6plex [K10]; 1xDeamidated [N1(100)]	0.0739179	0.00117085	1	7	2	4507157	4507157 [1986-1995]	0	1398.73	N1(Deamidated): 100	14.3	23.4	10.6	11.8	8.2	17.4	16.1	12.4667	0.774327	#N/A	Unique	1.73218	High	0.002989	0.06024
SORT1	6272	17149834	NP_002950.3	98	Yes	Yes	4	NNT	DFVAKLA	NTHQHVF	Yes	High	[K].LANNTHQHVFDDLR.[G]	1xTMT6plex [N-Term]; 1xDeamidated [N3(99.8)]	4.59212e-05	0	1	2	3	17149834	17149834 [96-109]	0	1909.97	N3(Deamidated): 99.83	7.8	6.8	10	7.5	6.5	17.7	8.2	10.5667	1.28862	#N/A	Unique	2.34205	High	0	3.509e-07
SORT1	6272	17149834	NP_002950.3	406	Yes	Yes	15	NVT	GGETDFT	VTSLRGV	Yes	High	[R].HLYTTTGGETDFTNVTSLR.[G]	1xTMT6plex [N-Term]; 1xDeamidated [N14(100)]	3.54736e-11	0	1	4	3	17149834	17149834 [393-411]	0	2343.17	N14(Deamidated): 100	11.8	10.2	13	13.2	8	13.3	11.6667	11.5	0.985714	#N/A	Unique	6.36644	High	0	8.225e-16
SPPL2A	84888	530406560	XP_005254779.1	149	Yes	Yes	4	NQT	YKDFRDM	QTLGDNI	Yes	High	[R].DMNQTLGDNITVK.[M]	1xTMT6plex [K13]; 1xOxidation [M2(100)]; 1xDeamidated [N]	0.00166775	0	1	4	2	530406560	530406560 [147-159]	0	1694.85	M2(Oxidation): 100; N3(Deamidated): 100	15.7	17.2	9.8	15.2	15.2	9.3	14.2333	13.2333	0.929742	0.95	Unique	2.33971	High	0	5.572e-05
SPPL2A	84888	530406560	XP_005254779.1	149	Yes	Yes	4	NQT	YKDFRDM	QTLGDNI	Yes	High	[R].DMNQTLGDNITVK.[M]	2xTMT6plex [N-Term; K13]; 1xOxidation [M2(100)]; 2xDeamidated [N3(100); N9(100)]	0.15611	0.00357109	1	4	2	530406560	530406560 [147-159]	0	1924.99	M2(Oxidation): 100; N3(Deamidated): 100; N9(Deamidated): 100	6.7	10.8	6.9	7.2	6.3	9.4	8.13333	7.63333	0.938525	0.95	Unique	1.7629	High	0.001331	0.03713
SPPL2A	84888	530406560	XP_005254779.1	149	Yes	Yes	4	NQT	YKDFRDM	QTLGDNI	Yes	High	[R].DMNQTLGDNITVK.[M]	2xTMT6plex [N-Term; K13]; 1xOxidation [M2(100)]; 1xDeamidated [N3(100)]	0.000211073	0	1	4	4	530406560	530406560 [147-159]	0	1924.01	M2(Oxidation): 100; N3(Deamidated): 100	19.8	16.7	8.1	17.1	13.4	14.2	14.8667	14.9	1.00224	0.95	Unique	3.73898	High	0	3.018e-06
SPPL2A	84888	530406560	XP_005254779.1	149	Yes	Yes	4	NQT	YKDFRDM	QTLGDNI	Yes	High	[R].DMNQTLGDNITVK.[M]	1xTMT6plex [K13]; 1xOxidation [M2(100)]; 2xDeamidated [N3(100); N9(100)]	0.00182685	0	1	4	4	530406560	530406560 [147-159]	0	1695.83	M2(Oxidation): 100; N3(Deamidated): 100; N9(Deamidated): 100	15.9	17.6	14.8	14.2	17.7	11.4	16.1	14.4333	0.89648	0.95	Unique	2.43079	High	0	6.37e-05
SSR1	6745	169404009	NP_003135.2	136	Yes	Yes	12	NFT	DYQFYIQ	FTALPLN	Yes	High	[R].YPQDYQFYIQNFTALPLNTVVPPQR.[Q]	1xTMT6plex [N-Term]; 1xDeamidated [N11(100)]	1.30172e-11	0	1	1	3	169404009	169404009 [126-150]	0	3242.67	N11(Deamidated): 100	145.1	131.6	129.1	127.4	131.8	158.7	135.267	139.3	1.02982	1.13	Unique	6.40378	High	0	2.001e-16
SSR2	6746	767910283	XP_011508225.1	123	Yes	Yes	6	NFT	PLKAGYF	FTSATIT	No	High	[K].AGYFNFTSATITYLAQEDGPVVIGSTSAPGQGGILAQR.[E]	1xTMT6plex [N-Term]; 1xDeamidated [N5(100)]	1.15949e-07	0	1	2	1	767910283	767910283 [119-156]	0	4088.08	N5(Deamidated): 100	104.8	73	53.5	138	65.1	76.3	77.1	93.1333	1.20796	1.05	Unique	3.75455	High	0	7.53e-11
SSR2	6746	767910283	XP_011508225.1	107	Yes	Yes	7	NVS	DRIAPAS	VSHTVVL	No	High	[R].IAPASNVSHTVVLRPLK.[A]	1xTMT6plex [K17]; 1xDeamidated [N6(100)]	2.76305e-08	0	1	2	7	767910283	767910283 [102-118]	0	2032.21	N6(Deamidated): 100	16.7	20.2	15.5	15.1	18.5	19.4	17.4667	17.6667	1.01145	1.05	Unique	4.12799	High	0	9.952e-12
SSR2	6746	767910283	XP_011508225.1	107	Yes	Yes	7	NVS	DRIAPAS	VSHTVVL	No	High	[R].IAPASNVSHTVVLRPLK.[A]	2xTMT6plex [N-Term; K17]; 1xDeamidated [N6(100)]	1.80269e-07	0	1	2	5	767910283	767910283 [102-118]	0	2261.37	N6(Deamidated): 100	17.4	17.8	11.5	16.2	14.8	25.6	15.5667	18.8667	1.21199	1.05	Unique	3.79229	High	0	8.749e-10
ST3GAL1	6482	1034661205	XP_016869225.1	114	Yes	No	7	NDT	EKKPNNL	DTIKELF	No	High	[K].KPNNLNDTIK.[E]	3xTMT6plex [K1; N-Term; K10]; 1xDeamidated [N6(98.6)]	0.00274612	0	1	1	2	1034661205	1034661205 [109-118]	0	1845.1	N4(Deamidated): 49.93; N6(Deamidated): 49.93	13.6	100.5	29.7	47.5	73.3	30.7	47.9333	50.5	1.05355	#N/A	Unique	2.19426	High	0	0.0009696
ST3GAL1	6482	1034661205	XP_016869225.1	323	Yes	Yes	12	NVT	HDADFES	VTATLAS	No	High	[K].TGVHDADFESNVTATLASINK.[I]	1xTMT6plex [K21]; 1xDeamidated [N11(100)]	0.0139978	0	1	1	3	1034661205	1034661205 [313-333]	0	2420.21	N11(Deamidated): 100	10.2	10.9	8.2	16.2	13.5	7.9	9.76667	12.5333	1.28328	#N/A	Unique	2.10965	High	0	0.00113
ST3GAL1	6482	1034661205	XP_016869225.1	114	Yes	Yes	9	NDT	EKKPNNL	DTIKELF	No	High	[R].EKKPNNLNDTIK.[E]	4xTMT6plex [N-Term; K2; K3; K12]; 1xDeamidated [N8(100)]	0.000205086	0	1	1	4	1034661205	1034661205 [107-118]	1	2331.41	N8(Deamidated): 100	4.3	35.9	10.7	18.9	35.8	12.4	16.9667	22.3667	1.31827	#N/A	Unique	2.30918	High	0	2.907e-06
ST3GAL1	6482	1034661205	XP_016869225.1	323	Yes	Yes	13	NVT	HDADFES	VTATLAS	No	High	[R].KTGVHDADFESNVTATLASINK.[I]	3xTMT6plex [K1; N-Term; K22]; 2xDeamidated [N12(100); N21(100)]	0.0515134	0.000598249	1	1	2	1034661205	1034661205 [312-333]	1	3007.62	N12(Deamidated): 100; N21(Deamidated): 100	4.9	7.6	5	10.1	6	6.2	5.83333	7.43333	1.27429	#N/A	Unique	2.01937	High	0.000164	0.007292
ST3GAL1	6482	1034661205	XP_016869225.1	323	Yes	Yes	13	NVT	HDADFES	VTATLAS	No	High	[R].KTGVHDADFESNVTATLASINK.[I]	3xTMT6plex [K1; N-Term; K22]; 1xDeamidated [N12(100)]	0.00139661	0	1	1	1	1034661205	1034661205 [312-333]	1	3006.64	N12(Deamidated): 100	3.8	10.1	3.7	11.4	7.8	5.4	5.86667	8.2	1.39773	#N/A	Unique	2.25644	High	0	4.339e-05
ST3GAL4	6484	363543348	NP_001241687.1	310	Yes	Yes	9	NVS	SMAGSGH	VSQEALA	Yes	High	[K].SMAGSGHNVSQEALAIK.[R]	2xTMT6plex [N-Term; K17]; 1xOxidation [M2(100)]; 1xDeamidated [N8(100)]	0.0990973	0.00222925	1	3	1	363543348	363543348 [303-319]	0	2175.15	M2(Oxidation): 100; N8(Deamidated): 100	11	12.6	8.3	7.8	6.9	13.9	10.6333	9.53333	0.896552	#N/A	Unique	1.4414	High	0.0005939	0.01894
ST8SIA6	338596	54234057	NP_001004470.1	66	Yes	Yes	4	NST	TAVPRAT	STYLNEK	No	High	[R].ATNSTYLNEK.[S]	2xTMT6plex [N-Term; K10]; 1xDeamidated [N3(100)]	0.0589423	0.000598249	1	1	3	54234057	54234057 [64-73]	0	1599.86	N3(Deamidated): 100	15.5	7.3	9.3	84.7	9.3	11.1	10.7	35.0333	3.27414	#N/A	Unique	1.85073	High	0.000164	0.00886
STIM1	6786	485836756	NP_001264890.1	171	Yes	Yes	6	NTT	MPRLAVT	TTMTGTV	Yes	High	[R].LAVTNTTMTGTVLK.[M]	2xTMT6plex [N-Term; K14]; 1xOxidation [M8(100)]; 1xDeamidated [N5(100)]	0.000204105	0	1	3	6	485836756	485836756 [167-180]	0	1925.1	N5(Deamidated): 100; M8(Oxidation): 100	20.7	20.1	12.7	25.4	22.5	18.2	17.8333	22.0333	1.23551	1.11	Unique	2.62427	High	0	2.869e-06
STIM1	6786	485836756	NP_001264890.1	171	Yes	Yes	6	NTT	MPRLAVT	TTMTGTV	Yes	High	[R].LAVTNTTMTGTVLK.[M]	1xTMT6plex [K14]; 1xOxidation [M8(100)]; 1xDeamidated [N5(100)]	0.00176654	0	1	3	5	485836756	485836756 [167-180]	0	1695.94	N5(Deamidated): 100; M8(Oxidation): 100	21.1	28.5	23.1	22.8	36.8	20.7	24.2333	26.7667	1.10454	1.11	Unique	3.01296	High	0	6.06e-05
STT3A	3703	511630715	NP_001265432.1	544	Yes	Yes	7	NNT	NRTILVD	NTWNNTH	Yes	High	[R].TILVDNNTWNNTHISR.[V]	1xTMT6plex [N-Term]; 2xDeamidated [N6(99.8); N7(99.6)]	8.28664e-07	0	1	2	9	511630715	511630715 [539-554]	0	2129.08	N6(Deamidated): 99.85; N10(Deamidated): 100	11.1	6.6	7.2	7.8	6.3	14.5	8.3	9.53333	1.14859	1.19	Unique	3.77473	High	0	1.188e-07
STT3A	3703	511630715	NP_001265432.1	544	Yes	Yes	7	NNT	NRTILVD	NTWNNTH	Yes	High	[R].TILVDNNTWNNTHISR.[V]	1xTMT6plex [N-Term]; 1xDeamidated [N]	3.34747e-08	0	1	2	16	511630715	511630715 [539-554]	0	2128.1	N10(Deamidated): 99.81	39.2	40.1	30.4	30.1	35	57.6	36.5667	40.9	1.11851	1.19	Unique	5.37679	High	0	1.308e-11
STT3B	201595	30578410	NP_849193.1	641	Yes	Yes	6	NET	VGKAMSS	ETAAYKI	Yes	High	[K].AMSSNETAAYK.[I]	2xTMT6plex [N-Term; K11]; 1xOxidation [M2(100)]; 1xDeamidated [N5(100)]	0.000111529	0	1	4	13	30578410	30578410 [637-647]	0	1647.83	M2(Oxidation): 100; N5(Deamidated): 100	143.2	182.5	150.9	84.9	132.7	248.1	158.867	155.233	0.97713	0.96	Unique	2.85347	High	0	5.109e-06
STT3B	201595	30578410	NP_849193.1	641	Yes	Yes	6	NET	VGKAMSS	ETAAYKI	Yes	High	[K].AMSSNETAAYK.[I]	1xTMT6plex [K11]; 1xOxidation [M2(100)]; 1xDeamidated [N5(100)]	0.0010275	0	1	4	5	30578410	30578410 [637-647]	0	1418.67	M2(Oxidation): 100; N5(Deamidated): 100	19.3	35.2	25.5	15.2	29.7	32.5	26.6667	25.8	0.9675	0.96	Unique	3.10128	High	0	0.001728
STT3B	201595	30578410	NP_849193.1	623	Yes	Yes	7	NNT	NRTTLVD	NTWNNSH	Yes	High	[R].TTLVDNNTWNNSHIALVGK.[A]	2xTMT6plex [N-Term; K19]; 3xDeamidated [N7(75); N10(75); N11(75)]	0.0814082	0.00222925	1	4	3	30578410	30578410 [618-636]	0	2558.35	N6(Deamidated): 75; N7(Deamidated): 75; N10(Deamidated): 75; N11(Deamidated): 75	11	11.4	12.9	14.7	10	17.2	11.7667	13.9667	1.18697	0.96	Unique	1.84872	High	0.0005939	0.0169
STT3B	201595	30578410	NP_849193.1	623	Yes	Yes	7	NNT	NRTTLVD	NTWNNSH	Yes	High	[R].TTLVDNNTWNNSHIALVGK.[A]	2xTMT6plex [N-Term; K19]; 2xDeamidated [N6(99.8); N]	2.22661e-08	0	1	4	8	30578410	30578410 [618-636]	0	2557.37	N6(Deamidated): 99.79; N10(Deamidated): 99.79	35.7	34.1	27.7	33.3	28.9	48.8	32.5	37	1.13846	0.96	Unique	3.44707	High	0	7.325e-12
STT3B	201595	30578410	NP_849193.1	623	Yes	Yes	7	NNT	NRTTLVD	NTWNNSH	Yes	High	[R].TTLVDNNTWNNSHIALVGK.[A]	2xTMT6plex [N-Term; K19]; 1xDeamidated [N]	1.53967e-11	0	1	4	19	30578410	30578410 [618-636]	0	2556.38	N10(Deamidated): 100	32.3	37.1	30.5	26.4	26.2	57.6	33.3	36.7333	1.1031	0.96	Unique	5.16872	High	0	2.53e-16
STT3B	201595	30578410	NP_849193.1	623	Yes	No	7	NNT	NRTTLVD	NTWNNSH	Yes	High	[R].TTLVDNNTWNNSHIALVGK.[A]	1xTMT6plex [K19]; 1xDeamidated [N]	0.00339116	0	1	4	10	30578410	30578410 [618-636]	0	2327.22	N10(Deamidated): 49.87; N11(Deamidated): 49.87	12.2	13.6	12.4	14.9	13	15.2	12.7333	14.3667	1.12827	0.96	Unique	2.24778	High	0	0.0001527
STT3B	201595	30578410	NP_849193.1	623	Yes	No	7	NNT	NRTTLVD	NTWNNSH	Yes	High	[R].TTLVDNNTWNNSHIALVGK.[A]	1xTMT6plex [K19]; 2xDeamidated [N]	0.019167	0	1	4	18	30578410	30578410 [618-636]	0	2328.2	N6(Deamidated): 50; N7(Deamidated): 50; N10(Deamidated): 50; N11(Deamidated): 50	29.3	19.1	17.9	23.1	22.8	29.7	22.1	25.2	1.14027	0.96	Unique	1.98663	High	0.002187	0.04846
SUCO	51430	544346209	NP_057311.3	681	Yes	Yes	6	NAT	GNKSISE	ATATAAP	No	High	[K].SISENATATAAPK.[M]	2xTMT6plex [N-Term; K13]; 1xDeamidated [N5(100)]	0.00196309	0	1	6	6	544346209	544346209 [677-689]	0	1719.95	N5(Deamidated): 100	25	20.3	20.5	16.1	14.8	20.6	21.9333	17.1667	0.782675	#N/A	Unique	2.37309	High	0	7.031e-05
SUCO	51430	544346209	NP_057311.3	681	Yes	Yes	6	NAT	GNKSISE	ATATAAP	No	High	[K].SISENATATAAPK.[M]	1xTMT6plex [K13]; 1xDeamidated [N5(100)]	0.0342877	0	1	6	3	544346209	544346209 [677-689]	0	1490.79	N5(Deamidated): 100	14.1	10.6	11.3	9.6	12.9	11.1	12	11.2	0.933333	#N/A	Unique	1.61948	High	0.0005939	0.0196
SUMF1	285362	767923038	XP_011531926.1	141	Yes	Yes	4	NST	TEFEKFV	STGYLTE	Yes	High	[K].FVNSTGYLTEAEK.[F]	2xTMT6plex [N-Term; K13]; 1xDeamidated [N3(100)]	0.00773542	0	1	8	6	767923038	767923038 [139-151]	0	1918.02	N3(Deamidated): 100	36.1	50.3	32.7	16.1	33.6	34.5	39.7	28.0667	0.706969	#N/A	Unique	2.29214	High	0	0.00284
SUMF1	285362	767923038	XP_011531926.1	141	Yes	Yes	4	NST	TEFEKFV	STGYLTE	Yes	High	[K].FVNSTGYLTEAEK.[F]	1xTMT6plex [K13]; 1xDeamidated [N3(100)]	0.00021933	0	1	8	4	767923038	767923038 [139-151]	0	1688.86	N3(Deamidated): 100	35.3	58.4	51.2	17.9	45.4	29.3	48.3	30.8667	0.639061	#N/A	Unique	3.24034	High	0	3.176e-06
SUN1	23353	195972890	NP_001124437.1	705	Yes	Yes	8	NIS	KTLSPTG	ISSAPKD	No	High	[K].TLSPTGNISSAPK.[D]	2xTMT6plex [N-Term; K13]; 1xDeamidated [N7(100)]	1.16506e-07	0	1	3	7	195972890	195972890 [699-711]	0	1731.99	N7(Deamidated): 100	81.3	73.2	60	37.9	59.4	64.2	71.5	53.8333	0.752914	1.13	Unique	4.00863	High	0	1.116e-07
SUN1	23353	195972890	NP_001124437.1	705	Yes	Yes	8	NIS	KTLSPTG	ISSAPKD	No	High	[K].TLSPTGNISSAPK.[D]	1xTMT6plex [K13]; 1xDeamidated [N7(100)]	0.00158967	0	1	3	4	195972890	195972890 [699-711]	0	1502.83	N7(Deamidated): 100	18.7	16.7	16.1	19.7	18.3	23.2	17.1667	20.4	1.18835	1.13	Unique	2.58559	High	0	5.232e-05
SUN1	23353	195972890	NP_001124437.1	561	Yes	Yes	2	NVT	LQLQILR	VTHHVSV	No	High	[R].NVTHHVSVTK.[Q]	1xTMT6plex [K10]; 1xDeamidated [N1(100)]	0.140319	0.00357109	1	3	5	195972890	195972890 [561-570]	0	1351.75	N1(Deamidated): 100	13	11.9	8.1	7.7	10.6	10.2	11	9.5	0.863636	1.13	Unique	2.20929	High	0.001589	0.04107
SUN2	25777	313760643	NP_001186508.1	657	Yes	Yes	6	NST	VPKALSP	STISSAP	No	High	[K].ALSPNSTISSAPK.[D]	2xTMT6plex [N-Term; K13]; 1xDeamidated [N5(100)]	7.21261e-09	0	1	5	9	313760643	313760643 [653-665]	0	1731.99	N5(Deamidated): 100	56.6	55.6	40.9	26.1	53.9	33.3	51.0333	37.7667	0.740039	1.02	Unique	3.96663	High	0	1.496e-12
SUN2	25777	313760643	NP_001186508.1	657	Yes	Yes	6	NST	VPKALSP	STISSAP	No	High	[K].ALSPNSTISSAPK.[D]	1xTMT6plex [K13]; 1xDeamidated [N5(100)]	0.0221004	0	1	5	4	313760643	313760643 [653-665]	0	1502.83	N5(Deamidated): 100	15.6	16.6	13.1	12	16.4	11.5	15.1	13.3	0.880795	1.02	Unique	1.97987	High	0	0.002163
SUSD2	56241	10092665	NP_062547.1	162	Yes	Yes	6	NET	MEKSELV	ETRWQYY	Yes	High	[K].SELVNETR.[W]	1xTMT6plex [N-Term]; 1xDeamidated [N5(100)]	0.173477	0.00554469	1	1	2	10092665	10092665 [158-165]	0	1177.63	N5(Deamidated): 100	38.6	16.2	19.6	22.9	14.1	25	24.8	20.6667	0.833333	#N/A	Unique	1.79534	High	0.001833	0.04353
SUSD2	56241	10092665	NP_062547.1	494	Yes	Yes	9	NGT	AQPGTMS	GTETRGT	No	High	[R].AQPGTMSNGTETR.[G]	1xTMT6plex [N-Term]; 1xOxidation [M6(100)]; 1xDeamidated [N8(100)]	0.112545	0.00274374	1	1	3	10092665	10092665 [487-499]	0	1595.75	M6(Oxidation): 100; N8(Deamidated): 100	52.7	4.7	6.4	22.2	4.7	5.3	21.2667	10.7333	0.504702	#N/A	Unique	1.65051	High	0.003206	0.06433
SYPL1	6856	5803185	NP_006745.1	71	Yes	Yes	17	NKT	CPPAVTE	KTVTATF	Yes	High	[K].GQTEIQVNCPPAVTENK.[T]	1xCarbamidomethyl [C9]; 2xTMT6plex [N-Term; K17]; 1xDeamidated [N16(100)]	6.27595e-09	0	1	2	3	5803185	5803185 [56-72]	0	2344.22	N16(Deamidated): 100	23.6	22.8	11.5	6.9	12.2	23.3	19.3	14.1333	0.732297	1.02	Unique	4.20589	High	0	1.226e-12
TACSTD2	4070	166795236	NP_002344.2	168	Yes	Yes	10	NHS	RPTAGAF	HSDLDAE	No	High	[R].HRPTAGAFNHSDLDAELR.[R]	1xTMT6plex [N-Term]; 1xDeamidated [N9(100)]	0.00128727	0	1	1	11	166795236	166795236 [160-177]	0	2237.13	N9(Deamidated): 100	19.7	29.6	17.4	28.7	24	18.6	22.2333	23.7667	1.06897	0.91	Unique	2.47146	High	0	3.875e-05
TACSTD2	4070	166795236	NP_002344.2	168	Yes	Yes	10	NHS	RPTAGAF	HSDLDAE	No	High	[R].HRPTAGAFNHSDLDAELRR.[L]	1xTMT6plex [N-Term]; 1xDeamidated [N9(100)]	0.187595	0.00695865	1	1	4	166795236	166795236 [160-178]	1	2393.23	N9(Deamidated): 100	9.1	6	6.5	7	5.3	4.7	7.2	5.66667	0.787037	0.91	Unique	1.19523	High	0.002187	0.04906
TACSTD2	4070	166795236	NP_002344.2	208	Yes	Yes	3	NTS	IQIELRQ	TSQKAAG	No	High	[R].QNTSQKAAGDVDIGDAAYYFER.[D]	2xTMT6plex [N-Term; K6]; 1xDeamidated [N2(100)]	0.0986468	0.00222925	1	1	1	166795236	166795236 [207-228]	1	2878.43	N2(Deamidated): 100	5.1	19.7	4.1	34.9	9.6	5.4	9.63333	16.6333	1.72664	0.91	Unique	1.10975	High	0.0005939	0.01884
TENM2	57451	1034645510	XP_016865149.1	2197	Yes	Yes	7	NTT	LKLGPYA	TTKYTYD	No	High	[K].LGPYANTTK.[Y]	1xTMT6plex [K9]; 1xDeamidated [N6(100)]	0.0732403	0.00117085	1	14	3	1034645510	1034645510 [2192-2200]	0	1194.66	N6(Deamidated): 100	8.3	7.3	6.3	6	6.5	25.5	7.3	12.6667	1.73516	#N/A	Unique	1.53231	High	0.0003202	0.01215
TFPI	7035	767919447	XP_011510011.1	145	Yes	Yes	6	NQT	ITRYFYN	QTKQCER	No	High	[R].YFYNNQTK.[Q]	2xTMT6plex [N-Term; K8]; 2xDeamidated [N4(100); N5(100)]	0.0105595	0	1	2	6	767919447	767919447 [141-148]	0	1537.79	N4(Deamidated): 100; N5(Deamidated): 100	40	41.1	56.7	60.5	38.2	84.5	45.9333	61.0667	1.32946	#N/A	Unique	2.44493	High	0.000164	0.008054
TFPI	7035	767919447	XP_011510011.1	145	Yes	Yes	6	NQT	ITRYFYN	QTKQCER	No	High	[R].YFYNNQTK.[Q]	1xTMT6plex [K8]; 2xDeamidated [N4(100); N5(100)]	0.116697	0.00315632	1	2	6	767919447	767919447 [141-148]	0	1308.63	N4(Deamidated): 100; N5(Deamidated): 100	23.6	25.9	28	34.5	22.6	29.8	25.8333	28.9667	1.12129	#N/A	Unique	1.91697	High	0.005257	0.0918
TFPI	7035	767919447	XP_011510011.1	145	Yes	Yes	6	NQT	ITRYFYN	QTKQCER	No	High	[R].YFYNNQTK.[Q]	2xTMT6plex [N-Term; K8]; 1xDeamidated [N]	0.00823254	0	1	2	7	767919447	767919447 [141-148]	0	1536.81	N5(Deamidated): 100	32	45	61.6	49.8	35.2	89.9	46.2	58.3	1.2619	#N/A	Unique	2.80242	High	0.0009713	0.02993
TFPI2	7980	5730091	NP_006519.1	170	Yes	Yes	9	NVT	DEGLCSA	VTRYYFN	No	High	[K].DEGLCSANVTR.[Y]	1xCarbamidomethyl [C5]; 1xTMT6plex [N-Term]; 1xDeamidated [N8(100)]	0.00811507	0	1	2	4	5730091	5730091 [163-173]	0	1451.7	N8(Deamidated): 100	11	12.5	35.2	11.5	32.4	16.2	19.5667	20.0333	1.02385	#N/A	Unique	2.22589	High	0	0.0005221
TFRC	7037	189458817	NP_003225.2	251	Yes	Yes	11	NGS	EDLYTPV	GSIVIVR	Yes	High	[K].DFEDLYTPVNGSIVIVR.[A]	1xTMT6plex [N-Term]; 1xDeamidated [N10(100)]	7.49586e-10	0	1	2	7	189458817	189458817 [242-258]	0	2167.15	N10(Deamidated): 100	559	364.3	217.3	507.4	283.1	687.4	380.2	492.633	1.29572	1.2	Unique	5.61553	High	0	6.123e-14
TFRC	7037	189458817	NP_003225.2	251	Yes	Yes	12	NGS	EDLYTPV	GSIVIVR	Yes	High	[K].KDFEDLYTPVNGSIVIVR.[A]	2xTMT6plex [K1; N-Term]; 1xDeamidated [N11(100)]	6.04145e-11	0	1	2	6	189458817	189458817 [241-258]	1	2524.41	N11(Deamidated): 100	540.5	315	156.1	459.4	256.5	632.9	337.2	449.6	1.33333	1.2	Unique	6.34419	High	0	1.749e-15
TFRC	7037	189458817	NP_003225.2	251	Yes	Yes	12	NGS	EDLYTPV	GSIVIVR	Yes	High	[K].KDFEDLYTPVNGSIVIVR.[A]	1xTMT6plex [K1]; 1xDeamidated [N11(100)]	4.27399e-06	0	1	2	3	189458817	189458817 [241-258]	1	2295.24	N11(Deamidated): 100	11.1	9.6	7.2	11.9	10.4	9.4	9.3	10.5667	1.1362	1.2	Unique	3.93863	High	0	4.377e-08
TFRC	7037	189458817	NP_003225.2	251	Yes	Yes	21	NGS	EDLYTPV	GSIVIVR	Yes	High	[K].LVHANFGTKKDFEDLYTPVNGSIVIVR.[A]	3xTMT6plex [N-Term; K9; K10]; 1xDeamidated [N20(100)]	0.000296705	0	1	2	1	189458817	189458817 [232-258]	2	3721.09	N20(Deamidated): 100	11.5	9.9	7.9	71.4	8.1	9.6	9.76667	29.7	3.04096	1.2	Unique	3.14899	High	0	4.866e-06
TFRC	7037	189458817	NP_003225.2	727	Yes	Yes	8	NET	KQNNGAF	ETLFRNQ	Yes	High	[K].QNNGAFNETLFR.[N]	1xTMT6plex [N-Term]; 2xDeamidated [N7(100); N]	5.70018e-07	0	1	3	9	189458817	189458817 [721-732]	0	1641.81	N3(Deamidated): 100; N7(Deamidated): 100	113.2	70.3	39.7	140.2	49.3	145	74.4	111.5	1.49866	1.2	Unique	4.08889	High	0	7.127e-10
TFRC	7037	189458817	NP_003225.2	727	Yes	Yes	8	NET	KQNNGAF	ETLFRNQ	Yes	High	[K].QNNGAFNETLFR.[N]	1xTMT6plex [N-Term]; 3xDeamidated [N2(100); N3(100); N7(100)]	0.000572376	0	1	3	14	189458817	189458817 [721-732]	0	1642.79	N2(Deamidated): 100; N3(Deamidated): 100; N7(Deamidated): 100	71.5	75.5	43.1	152.2	48.4	108.3	63.3667	102.967	1.62493	1.2	Unique	2.87602	High	0	0.0003053
TFRC	7037	189458817	NP_003225.2	727	Yes	Yes	9	NET	KQNNGAF	ETLFRNQ	Yes	High	[R].KQNNGAFNETLFR.[N]	2xTMT6plex [K1; N-Term]; 3xDeamidated [N3(100); N4(100); N8(100)]	2.31372e-08	0	1	3	10	189458817	189458817 [720-732]	1	2000.05	N3(Deamidated): 100; N4(Deamidated): 100; N8(Deamidated): 100	126.8	59.1	37.3	236.7	51.6	146.3	74.4	144.867	1.94713	1.2	Unique	3.59939	High	0	7.76e-12
TFRC	7037	189458817	NP_003225.2	727	Yes	Yes	9	NET	KQNNGAF	ETLFRNQ	Yes	High	[R].KQNNGAFNETLFR.[N]	2xTMT6plex [K1; N-Term]; 2xDeamidated [N]	6.74219e-07	0	1	3	17	189458817	189458817 [720-732]	1	1999.06	N4(Deamidated): 100; N8(Deamidated): 100	164.4	109.1	50	249.5	76.6	186.5	107.833	170.867	1.58454	1.2	Unique	3.65302	High	0	9.038e-10
TFRC	7037	189458817	NP_003225.2	727	Yes	Yes	9	NET	KQNNGAF	ETLFRNQ	Yes	High	[R].KQNNGAFNETLFR.[N]	2xTMT6plex [K1; N-Term]; 1xDeamidated [N8(100)]	5.61874e-07	0	1	3	3	189458817	189458817 [720-732]	1	1998.08	N8(Deamidated): 100	61.5	44	17.5	48.3	21.3	56.6	41	42.0667	1.02602	1.2	Unique	3.64477	High	0	6.983e-10
TFRC	7037	189458817	NP_003225.2	727	Yes	Yes	9	NET	KQNNGAF	ETLFRNQ	Yes	High	[R].KQNNGAFNETLFR.[N]	1xTMT6plex [K1]; 3xDeamidated [N3(100); N4(100); N8(100)]	0.124311	0.00315632	1	3	2	189458817	189458817 [720-732]	1	1770.89	N3(Deamidated): 100; N4(Deamidated): 100; N8(Deamidated): 100	5	4.6	5	8.7	5.3	7.7	4.86667	7.23333	1.4863	1.2	Unique	1.38453	High	0.00084	0.02648
TFRC	7037	189458817	NP_003225.2	727	Yes	Yes	9	NET	KQNNGAF	ETLFRNQ	Yes	High	[R].KQNNGAFNETLFR.[N]	1xTMT6plex [K1]; 2xDeamidated [N8(100); N]	4.70358e-05	0	1	3	10	189458817	189458817 [720-732]	1	1769.9	N4(Deamidated): 100; N8(Deamidated): 100	49.1	33.5	24.1	43.7	29.4	40.9	35.5667	38	1.06842	1.2	Unique	3.78985	High	0	6.452e-06
TGFB1	7040	768010712	XP_011525544.1	136	Yes	Yes	12	NTS	HSIYMFF	TSELREA	Yes	High	[K].QSTHSIYMFFNTSELR.[E]	1xTMT6plex [N-Term]; 1xOxidation [M8(100)]; 1xDeamidated [N11(100)]	0.000951608	0	1	2	3	768010712	768010712 [126-141]	0	2207.06	M8(Oxidation): 100; N11(Deamidated): 100	7.5	6.1	5.1	4.7	6	6.6	6.23333	5.76667	0.925134	#N/A	Unique	2.2062	High	0	2.537e-05
TGFB2	7042	208022653	NP_001129071.1	168	Yes	Yes	10	NAS	DVSAMEK	ASNLVKA	No	High	[R].FDVSAMEKNASNLVK.[A]	2xTMT6plex [K8; K15]; 1xOxidation [M6(100)]; 1xDeamidated [N9(100)]	0.206184	0.00881471	1	2	2	208022653	208022653 [160-174]	1	2128.14	M6(Oxidation): 100; N9(Deamidated): 100	9.7	5.1	6	21.7	9.1	5.3	6.93333	12.0333	1.73558	#N/A	Unique	1.10204	High	0.006444	0.1107
TGOLN2	10618	332205947	NP_001193769.1	222	Yes	Yes	5	NKS	QTPKDGS	KSGAEEQ	Yes	High	[K].DGSNKSGAEEQGPIDGPSK.[S]	2xTMT6plex [K5; K19]; 1xDeamidated [N4(100)]	0.0281319	0	1	4	3	332205947	332205947 [219-237]	1	2332.17	N4(Deamidated): 100	10.3	8.2	7.6	6.2	7.7	8.8	8.7	7.56667	0.869732	#N/A	Unique	1.55103	High	0	0.00305
TGOLN2	10618	332205947	NP_001193769.1	152	Yes	Yes	14	NRS	QTPEDSP	RSGAEAK	Yes	High	[K].SGAEAQTPEDSPNRSGAEAK.[T]	1xTMT6plex [K20]; 1xDeamidated [N13(100)]	0.00129346	0	1	4	3	332205947	332205947 [140-159]	1	2232.06	N13(Deamidated): 100	7.8	3.8	4.1	8.5	3.4	5.4	5.23333	5.76667	1.10191	#N/A	Unique	2.14255	High	0	3.906e-05
THBD	7056	4507483	NP_000352.1	115	Yes	Yes	10	NNT	FQWVTGD	NTSYSRW	No	High	[R].GFQWVTGDNNTSYSR.[W]	1xTMT6plex [N-Term]; 1xDeamidated [N]	0.00185332	0	1	1	12	4507483	4507483 [107-121]	0	1961.92	N10(Deamidated): 99.7	42.2	16.3	9.2	10.8	12.3	5.9	22.5667	9.66667	0.42836	0.98	Unique	2.42404	High	0	0.0004924
THBS1	7057	40317626	NP_003237.2	1067	Yes	Yes	4	NST	GLSVKVV	STTGPGE	Yes	High	[K].VVNSTTGPGEHLR.[N]	1xTMT6plex [N-Term]; 1xDeamidated [N3(100)]	1.15932e-06	0	1	2	14	40317626	40317626 [1065-1077]	0	1596.85	N3(Deamidated): 100	39.1	34.5	43.2	73.5	29.3	41.5	38.9333	48.1	1.23545	#N/A	Unique	4.94718	High	0	1.948e-09
THBS2	7058	40317628	NP_003238.2	1069	Yes	Yes	4	NST	GVSLKVV	STTGTGE	Yes	High	[K].VVNSTTGTGEHLR.[N]	1xTMT6plex [N-Term]; 1xDeamidated [N3(100)]	0.122089	0.00315632	1	1	1	40317628	40317628 [1067-1079]	0	1600.85	N3(Deamidated): 100	8.3		4.1	3.8	7.1		6.2	5.45	0.879032	#N/A	Unique	0.905896	High	0.00084	0.02575
THY1	7070	902967473	NP_001298091.1	42	Yes	Yes	4	NTS	RLDCRHE	TSSSPIQ	Yes	High	[R].HENTSSSPIQYEFSLTR.[E]	1xTMT6plex [N-Term]; 1xDeamidated [N3(100)]	0.190864	0.00695865	1	1	1	902967473	902967473 [40-56]	0	2226.09	N3(Deamidated): 100	10.5	7	6	6.6	9.7	14.5	7.83333	10.2667	1.31064	#N/A	Unique	1.37026	High	0.002301	0.05025
[truncated: 97 more rows]

## Sheet: S2
Supplementary table S2 : Differentially N-glycosylated proteins without significant changes in their global protein expression levels
[truncated: 103 more rows]

## Sheet: S3
Supplementary table S3 : Differentially glycosylated (p<0.05) N-linked glycopeptides in the non-type subtype of bladder carcinoma
[truncated: 120 more rows]
